# Supplementary material for: Transcription Factor ZNF683 Inhibits SIV/HIV Replication through Regulating IFNγ Secretion of CD8+ T Cells
Source: Viruses. 2022 Mar 30;14(4):719. doi: 10.3390/v14040719 (PMC9030044; doi:10.3390/v14040719)
Supplement: Supplementary file 1 [file viruses-14-00719-s001.zip › Table S1.xlsx]

## Sheet: Sheet1
IRF5	hTFtarget	NW_012015244.1:18944122-18946122	747	762	+	27.1169	1.04e-09	1.82e-06	AAAAAAAAAAAAAAAA
IRF5	hTFtarget	NW_012015244.1:18944122-18946122	748	763	+	27.1169	1.04e-09	1.82e-06	AAAAAAAAAAAAAAAA
POLR3A	hTFtarget	NW_012015244.1:18944122-18946122	747	762	+	19.5769	1.04e-09	1.82e-06	AAAAAAAAAAAAAAAA
POLR3A	hTFtarget	NW_012015244.1:18944122-18946122	748	763	+	19.5769	1.04e-09	1.82e-06	AAAAAAAAAAAAAAAA
BTAF1	hTFtarget	NW_012015244.1:18944122-18946122	747	762	+	23.1282	1.04e-09	1.9e-06	AAAAAAAAAAAAAAAA
BTAF1	hTFtarget	NW_012015244.1:18944122-18946122	748	763	+	23.1282	1.04e-09	1.9e-06	AAAAAAAAAAAAAAAA
ZNF384	hTFtarget	NW_012015244.1:18944122-18946122	747	768	-	25.0833	3.38e-09	1.24e-05	AGGAATTTTTTTTTTTTTTTTT
IRF5	hTFtarget	NW_012015244.1:18944122-18946122	749	764	+	25.013	3.98e-09	4.64e-06	AAAAAAAAAAAAAAAT
POLR3A	hTFtarget	NW_012015244.1:18944122-18946122	749	764	+	19.1154	3.98e-09	4.65e-06	AAAAAAAAAAAAAAAT
ZNF384	hTFtarget	NW_012015244.1:18944122-18946122	747	771	+	23.125	1.08e-08	2.43e-05	AAAAAAAAAAAAAAAAATTCCTTGT
BTAF1	hTFtarget	NW_012015244.1:18944122-18946122	746	761	+	20.9615	1.24e-08	1.5e-05	CAAAAAAAAAAAAAAA
ZNF384	hTFtarget	NW_012015244.1:18944122-18946122	746	770	+	22.75	1.34e-08	2.43e-05	CAAAAAAAAAAAAAAAAATTCCTTG
IRF5	hTFtarget	NW_012015244.1:18944122-18946122	750	765	+	23.1818	1.69e-08	1.48e-05	AAAAAAAAAAAAAATT
BTAF1	hTFtarget	NW_012015244.1:18944122-18946122	749	764	+	20.5769	1.95e-08	1.77e-05	AAAAAAAAAAAAAAAT
ZNF384	hTFtarget	NW_012015244.1:18944122-18946122	748	772	+	21.6667	2.41e-08	2.92e-05	AAAAAAAAAAAAAAAATTCCTTGTC
GTF3C2	hTFtarget	NW_012015244.1:18944122-18946122	740	764	+	21.6364	2.44e-08	4.37e-05	CACCACCAAAAAAAAAAAAAAAAAT
GTF3C2	hTFtarget	NW_012015244.1:18944122-18946122	737	761	+	21.4935	2.66e-08	4.37e-05	AATCACCACCAAAAAAAAAAAAAAA
ZNF384	hTFtarget	NW_012015244.1:18944122-18946122	748	769	-	22.0833	2.71e-08	3.47e-05	AAGGAATTTTTTTTTTTTTTTT
ZNF384	hTFtarget	NW_012015244.1:18944122-18946122	746	767	-	22.0139	2.83e-08	3.47e-05	GGAATTTTTTTTTTTTTTTTTG
ZNF384	hTFtarget	NW_012015244.1:18944122-18946122	749	770	-	19.9722	9.43e-08	8.67e-05	CAAGGAATTTTTTTTTTTTTTT
ZKSCAN1	hTFtarget	NW_012015244.1:18944122-18946122	21	42	+	18.7168	1.01e-07	0.000381	CAGCAAGTATTTGATGAATTAG
CREBBP	hTFtarget	NW_012015244.1:18944122-18946122	398	409	-	16.7	1.02e-07	0.0004	AGAGAGAGGGAG
NKX6-1	database	NW_012015244.1:18944122-18946122	337	352	-	16.9249	1.34e-07	0.000485	AGTTATTAATTATTCC
ZNF384	hTFtarget	NW_012015244.1:18944122-18946122	744	768	+	18.0556	1.38e-07	0.000126	ACCAAAAAAAAAAAAAAAAATTCCT
IRF5	hTFtarget	NW_012015244.1:18944122-18946122	751	766	+	19.1818	1.92e-07	0.000134	AAAAAAAAAAAAATTC
GTF2I	hTFtarget	NW_012015244.1:18944122-18946122	1502	1517	+	18.7895	1.98e-07	0.000788	CCTGTGTGGCCTGGGC
ZNF143	hTFtarget	NW_012015244.1:18944122-18946122	741	765	-	16.3718	2.22e-07	0.000793	AATTTTTTTTTTTTTTTTTGGTGGT
ZNF384	hTFtarget	NW_012015244.1:18944122-18946122	745	766	-	18.2639	2.34e-07	0.000172	GAATTTTTTTTTTTTTTTTTGG
BTAF1	hTFtarget	NW_012015244.1:18944122-18946122	745	760	+	18.1282	2.47e-07	0.00018	CCAAAAAAAAAAAAAA
SP2	hTFtarget	NW_012015244.1:18944122-18946122	747	762	-	16.7778	2.5e-07	0.000469	TTTTTTTTTTTTTTTT
SP2	hTFtarget	NW_012015244.1:18944122-18946122	748	763	-	16.7778	2.5e-07	0.000469	TTTTTTTTTTTTTTTT
ZNF384	hTFtarget	NW_012015244.1:18944122-18946122	745	769	+	16.4167	2.81e-07	0.000204	CCAAAAAAAAAAAAAAAAATTCCTT
BTAF1	hTFtarget	NW_012015244.1:18944122-18946122	750	765	+	17.9359	3.03e-07	0.000184	AAAAAAAAAAAAAATT
AP2	database	NW_012015244.1:18944122-18946122	1587	1599	+	16.2424	3.49e-07	0.00139	CACCCCCCAGGCC
ERG	hTFtarget	NW_012015244.1:18944122-18946122	685	700	+	18.5789	3.51e-07	0.00134	CTTCCTTCCCTTCCCT
POLR3A	hTFtarget	NW_012015244.1:18944122-18946122	750	765	+	16.5769	3.97e-07	0.000347	AAAAAAAAAAAAAATT
ZNF384	hTFtarget	NW_012015244.1:18944122-18946122	744	765	-	17.0833	4.2e-07	0.000258	AATTTTTTTTTTTTTTTTTGGT
ZNF384	hTFtarget	NW_012015244.1:18944122-18946122	750	774	+	14.8194	5.38e-07	0.000298	AAAAAAAAAAAAAATTCCTTGTCTC
ZNF384	hTFtarget	NW_012015244.1:18944122-18946122	749	773	+	14.6528	5.74e-07	0.000298	AAAAAAAAAAAAAAATTCCTTGTCT
ZNF384	hTFtarget	NW_012015244.1:18944122-18946122	750	771	-	16.3611	5.9e-07	0.00031	ACAAGGAATTTTTTTTTTTTTT
RCOR1	hTFtarget	NW_012015244.1:18944122-18946122	1044	1062	+	17.3462	6.11e-07	0.00242	TTGCCTAGATTCACACAGT
ZNF143	hTFtarget	NW_012015244.1:18944122-18946122	739	763	-	15.6026	6.53e-07	0.00116	TTTTTTTTTTTTTTTTTGGTGGTGA
SUMO2/SUMO3	hTFtarget	NW_012015244.1:18944122-18946122	297	318	+	16.4231	7.07e-07	0.00238	TGAAAAATAAAGGATGTAATAA
AR	hTFtarget	NW_012015244.1:18944122-18946122	458	478	+	17.2597	7.2e-07	0.00272	GGTTTCTTTCTGTTTGCACAT
CREB1	hTFtarget	NW_012015244.1:18944122-18946122	398	413	-	16.5547	7.3e-07	0.00276	AAGAAGAGAGAGGGAG
TP53	hTFtarget	NW_012015244.1:18944122-18946122	151	172	-	16.9762	8.07e-07	0.00312	CAGGGTTTGTCTCCCTACCTGT
STAT1	hTFtarget	NW_012015244.1:18944122-18946122	138	153	-	15.4744	8.91e-07	0.00338	TGTCACTTCTGCTTCT
SP2	hTFtarget	NW_012015244.1:18944122-18946122	746	761	-	15.8889	9.25e-07	0.00116	TTTTTTTTTTTTTTTG
NKX3-1	hTFtarget	NW_012015244.1:18944122-18946122	1633	1644	+	15.1447	9.93e-07	0.00394	AAGCACTCAGCC
SMARCA4	hTFtarget	NW_012015244.1:18944122-18946122	747	762	+	16.2778	1e-06	0.00177	AAAAAAAAAAAAAAAA
SMARCA4	hTFtarget	NW_012015244.1:18944122-18946122	748	763	+	16.2778	1e-06	0.00177	AAAAAAAAAAAAAAAA
FLI1	hTFtarget	NW_012015244.1:18944122-18946122	681	695	+	15.9242	1.05e-06	0.00416	CTGACTTCCTTCCCT
ESR1	hTFtarget	NW_012015244.1:18944122-18946122	394	409	-	16.0141	1.09e-06	0.00426	AGAGAGAGGGAGGCTG
ERG	hTFtarget	NW_012015244.1:18944122-18946122	935	950	-	16.1447	1.12e-06	0.00432	AAGCACAATGTGTGCT
RCOR1	hTFtarget	NW_012015244.1:18944122-18946122	795	810	+	16.5915	1.15e-06	0.00452	CCCAACCTCAGTTTCT
ZNF384	hTFtarget	NW_012015244.1:18944122-18946122	751	772	-	14.7778	1.2e-06	0.000552	GACAAGGAATTTTTTTTTTTTT
TRIM28	hTFtarget	NW_012015244.1:18944122-18946122	1555	1576	-	15.3636	1.21e-06	0.00474	GGCCTCTTAGCTAGGGCTGCAA
ZNF219	database	NW_012015244.1:18944122-18946122	1585	1596	-	16.6404	1.24e-06	0.00494	CTGGGGGGTGGA
CDK8	hTFtarget	NW_012015244.1:18944122-18946122	313	328	-	15.961	1.27e-06	0.00485	TTTTCAGTTTTTATTA
ZNF219	database	NW_012015244.1:18944122-18946122	1585	1596	-	16.6122	1.27e-06	0.00504	CTGGGGGGTGGA
EP300	hTFtarget	NW_012015244.1:18944122-18946122	466	477	-	13.7222	1.35e-06	0.00517	TGTGCAAACAGA
E2F7	hTFtarget	NW_012015244.1:18944122-18946122	1288	1299	+	14.6753	1.36e-06	0.00493	TATATAAACAGG
TRIM28	hTFtarget	NW_012015244.1:18944122-18946122	1098	1119	-	16.2308	1.37e-06	0.00512	AGACAAAGGAGCCAGACTGAGT
IRF5	hTFtarget	NW_012015244.1:18944122-18946122	746	761	+	14.5974	1.41e-06	0.000821	CAAAAAAAAAAAAAAA
AR	hTFtarget	NW_012015244.1:18944122-18946122	458	479	-	16.403	1.41e-06	0.00524	CATGTGCAAACAGAAAGAAACC
AP4	database	NW_012015244.1:18944122-18946122	1066	1075	+	15.4228	1.49e-06	0.00591	CACAGCTGGT
AR	hTFtarget	NW_012015244.1:18944122-18946122	935	950	-	16.3636	1.52e-06	0.00575	AAGCACAATGTGTGCT
ZBTB10	hTFtarget	NW_012015244.1:18944122-18946122	686	701	-	16.2237	1.53e-06	0.00598	CAGGGAAGGGAAGGAA
GTF2I	hTFtarget	NW_012015244.1:18944122-18946122	413	428	+	16.0909	1.65e-06	0.00641	TACCCTCTGCCTGTGA
SMAD2/SMAD3	hTFtarget	NW_012015244.1:18944122-18946122	1102	1113	-	15.2763	1.67e-06	0.00665	AGGAGCCAGACT
EBF1	hTFtarget	NW_012015244.1:18944122-18946122	1909	1923	-	16.5606	1.74e-06	0.00683	GAGTCCCCAGGGCCT
TCF3	hTFtarget	NW_012015244.1:18944122-18946122	1858	1869	-	15.2879	1.76e-06	0.00697	ACACCTGCTGCC
EWSR1	hTFtarget	NW_012015244.1:18944122-18946122	685	700	-	6.68571	1.81e-06	0.00702	AGGGAAGGGAAGGAAG
IRF5	hTFtarget	NW_012015244.1:18944122-18946122	752	767	+	13.961	1.82e-06	0.000911	AAAAAAAAAAAATTCC
FOXH1	hTFtarget	NW_012015244.1:18944122-18946122	1102	1113	-	15.3684	1.88e-06	0.00745	AGGAGCCAGACT
C17orf96	hTFtarget	NW_012015244.1:18944122-18946122	398	422	-	15.7089	1.89e-06	0.00725	GCAGAGGGTAAGAAGAGAGAGGGAG
AR	hTFtarget	NW_012015244.1:18944122-18946122	933	952	+	15.2576	1.92e-06	0.00747	TGAGCACACATTGTGCTTGC
BRD4	hTFtarget	NW_012015244.1:18944122-18946122	397	418	+	15.6883	2.07e-06	0.00792	CCTCCCTCTCTCTTCTTACCCT
HIF1A	hTFtarget	NW_012015244.1:18944122-18946122	397	412	+	15.3636	2.08e-06	0.00802	CCTCCCTCTCTCTTCT
AR	hTFtarget	NW_012015244.1:18944122-18946122	935	950	-	15.9242	2.12e-06	0.00819	AAGCACAATGTGTGCT
HOXD8	database	NW_012015244.1:18944122-18946122	337	353	+	14.5543	2.13e-06	0.00737	GGAATAATTAATAACTT
TCF3	hTFtarget	NW_012015244.1:18944122-18946122	1909	1920	-	15.2763	2.14e-06	0.00842	TCCCCAGGGCCT
POU2F1	hTFtarget	NW_012015244.1:18944122-18946122	684	699	+	15.4211	2.15e-06	0.00834	ACTTCCTTCCCTTCCC
MYOG	database	NW_012015244.1:18944122-18946122	1859	1871	-	15.9213	2.17e-06	0.00855	TCACACCTGCTGC
ERG	hTFtarget	NW_012015244.1:18944122-18946122	681	696	+	15.2727	2.17e-06	0.00851	CTGACTTCCTTCCCTT
BTAF1	hTFtarget	NW_012015244.1:18944122-18946122	751	766	+	15.7179	2.18e-06	0.00114	AAAAAAAAAAAAATTC
ZNF143	hTFtarget	NW_012015244.1:18944122-18946122	1934	1945	-	15.8816	2.19e-06	0.00844	AACTGCAAGGAA
ERG	hTFtarget	NW_012015244.1:18944122-18946122	685	696	+	15.8026	2.19e-06	0.00854	CTTCCTTCCCTT
MYOG	database	NW_012015244.1:18944122-18946122	1859	1871	-	15.898	2.19e-06	0.00864	TCACACCTGCTGC
EBF1	database	NW_012015244.1:18944122-18946122	1910	1921	+	15.8276	2.21e-06	0.00872	GGCCCTGGGGAC
CREB1	hTFtarget	NW_012015244.1:18944122-18946122	394	409	-	15.2891	2.21e-06	0.00418	AGAGAGAGGGAGGCTG
EBF1	database	NW_012015244.1:18944122-18946122	1910	1921	+	15.7755	2.21e-06	0.00874	GGCCCTGGGGAC
HOXA9	hTFtarget	NW_012015244.1:18944122-18946122	1912	1920	+	15.2105	2.23e-06	0.00882	CCCTGGGGA
PBX1	hTFtarget	NW_012015244.1:18944122-18946122	1912	1920	+	16.2895	2.23e-06	0.00885	CCCTGGGGA
EP300	hTFtarget	NW_012015244.1:18944122-18946122	1912	1920	+	15.4857	2.23e-06	0.00884	CCCTGGGGA
HNF4A	hTFtarget	NW_012015244.1:18944122-18946122	1442	1453	-	14.8	2.24e-06	0.00889	GTCTGCCCTCTG
POLR3A	hTFtarget	NW_012015244.1:18944122-18946122	744	759	+	15.1026	2.31e-06	0.00162	ACCAAAAAAAAAAAAA
SMAD4	hTFtarget	NW_012015244.1:18944122-18946122	1101	1113	+	15.4242	2.35e-06	0.00933	CAGTCTGGCTCCT
SMAD1	hTFtarget	NW_012015244.1:18944122-18946122	913	924	-	14.831	2.39e-06	0.00931	ATTTCCATTTCA
ZFHX3	database	NW_012015244.1:18944122-18946122	341	351	-	15.5625	2.43e-06	0.00838	GTTATTAATTA
ESR1	hTFtarget	NW_012015244.1:18944122-18946122	912	927	+	15.2917	2.43e-06	0.00946	ATGAAATGGAAATAAA
MYC	hTFtarget	NW_012015244.1:18944122-18946122	145	166	+	13.1316	2.43e-06	0.00951	GAAGTGACAGGTAGGGAGACAA
ZFHX3	database	NW_012015244.1:18944122-18946122	341	351	-	15.6733	2.43e-06	0.00857	GTTATTAATTA
POU5F1	hTFtarget	NW_012015244.1:18944122-18946122	912	923	+	14.013	2.46e-06	0.00932	ATGAAATGGAAA
BRD4	hTFtarget	NW_012015244.1:18944122-18946122	317	328	+	15.2237	2.48e-06	0.00937	AAAAACTGAAAA
IKZF1	hTFtarget	NW_012015244.1:18944122-18946122	684	699	+	14.303	2.49e-06	0.00987	ACTTCCTTCCCTTCCC
ZNF384	hTFtarget	NW_012015244.1:18944122-18946122	743	764	-	13.0278	2.49e-06	0.00102	ATTTTTTTTTTTTTTTTTGGTG
FLI1	hTFtarget	NW_012015244.1:18944122-18946122	684	697	+	2.59211	2.52e-06	0.0099	ACTTCCTTCCCTTC
EBF1	hTFtarget	NW_012015244.1:18944122-18946122	1910	1921	+	15.9091	2.55e-06	0.0101	GGCCCTGGGGAC
ETV1	hTFtarget	NW_012015244.1:18944122-18946122	1288	1298	-	14	2.56e-06	0.00909	CTGTTTATATA
ELK3	database	NW_012015244.1:18944122-18946122	485	496	+	15.8265	2.58e-06	0.0103	GACTGGAAGTGC
ELK3	database	NW_012015244.1:18944122-18946122	485	496	+	15.7431	2.65e-06	0.0106	GACTGGAAGTGC
AR	hTFtarget	NW_012015244.1:18944122-18946122	459	475	+	15.7887	2.68e-06	0.00989	GTTTCTTTCTGTTTGCA
HNF4A	hTFtarget	NW_012015244.1:18944122-18946122	1442	1450	+	13.9857	2.72e-06	0.0108	CAGAGGGCA
MED1	hTFtarget	NW_012015244.1:18944122-18946122	1923	1931	-	13.8143	2.72e-06	0.0108	CACCTGCAG
AR	hTFtarget	NW_012015244.1:18944122-18946122	935	950	+	15.4429	2.72e-06	0.0107	AGCACACATTGTGCTT
GTF2I	hTFtarget	NW_012015244.1:18944122-18946122	794	809	+	15.0143	2.73e-06	0.0107	ACCCAACCTCAGTTTC
MYC	hTFtarget	NW_012015244.1:18944122-18946122	134	149	-	14.9231	2.74e-06	0.0105	ACTTCTGCTTCTCTTG
TFAP4	hTFtarget	NW_012015244.1:18944122-18946122	1065	1076	-	15.3182	2.74e-06	0.0108	TACCAGCTGTGT
SMAD2:SMAD3:SMAD4	database	NW_012015244.1:18944122-18946122	1101	1113	+	15.623	2.75e-06	0.0109	CAGTCTGGCTCCT
AR	hTFtarget	NW_012015244.1:18944122-18946122	935	949	-	15.5921	2.78e-06	0.0106	AGCACAATGTGTGCT
SMAD1	hTFtarget	NW_012015244.1:18944122-18946122	1952	1963	+	15.1842	2.78e-06	0.0108	ATAAAAGGAAGT
EWSR1	hTFtarget	NW_012015244.1:18944122-18946122	682	697	-	13.2714	2.81e-06	0.0108	GAAGGGAAGGAAGTCA
SMARCA4	hTFtarget	NW_012015244.1:18944122-18946122	746	761	+	15.2083	2.82e-06	0.00331	CAAAAAAAAAAAAAAA
ESR1	hTFtarget	NW_012015244.1:18944122-18946122	399	409	-	14.1194	2.93e-06	0.0112	AGAGAGAGGGA
CREB1	hTFtarget	NW_012015244.1:18944122-18946122	397	408	-	15.3939	2.93e-06	0.0114	GAGAGAGGGAGG
GTF2I	hTFtarget	NW_012015244.1:18944122-18946122	413	428	+	15.4096	2.96e-06	0.0114	TACCCTCTGCCTGTGA
ONECUT2	database	NW_012015244.1:18944122-18946122	336	356	-	15.5743	2.97e-06	0.0106	GAGAAGTTATTAATTATTCCC
ONECUT2	database	NW_012015244.1:18944122-18946122	336	356	-	15.5	3e-06	0.0107	GAGAAGTTATTAATTATTCCC
KDM5B	hTFtarget	NW_012015244.1:18944122-18946122	398	422	-	14.8333	3e-06	0.0114	GCAGAGGGTAAGAAGAGAGAGGGAG
AR	hTFtarget	NW_012015244.1:18944122-18946122	934	949	+	14.9143	3.02e-06	0.00656	GAGCACACATTGTGCT
FLI1	hTFtarget	NW_012015244.1:18944122-18946122	680	695	-	14.9793	3.15e-06	0.0122	AGGGAAGGAAGTCAGT
TP53	hTFtarget	NW_012015244.1:18944122-18946122	470	492	+	14.2857	3.21e-06	0.0122	TTTGCACATGAGGAAGACTGGAA
ESR1	hTFtarget	NW_012015244.1:18944122-18946122	397	411	+	14.5522	3.25e-06	0.0124	CCTCCCTCTCTCTTC
TCF12	hTFtarget	NW_012015244.1:18944122-18946122	1861	1869	-	13.5	3.31e-06	0.0131	ACACCTGCT
TAL1:TCF3	database	NW_012015244.1:18944122-18946122	1762	1773	+	15.6404	3.35e-06	0.0133	AAAACATCTGGT
AR	hTFtarget	NW_012015244.1:18944122-18946122	935	950	-	14.8	3.39e-06	0.00656	AAGCACAATGTGTGCT
ASCL1	hTFtarget	NW_012015244.1:18944122-18946122	1856	1867	+	15.0141	3.39e-06	0.0133	GTGGCAGCAGGT
AR	hTFtarget	NW_012015244.1:18944122-18946122	934	949	-	15.2	3.42e-06	0.0123	AGCACAATGTGTGCTC
AP4	database	NW_012015244.1:18944122-18946122	1066	1075	+	13.8073	3.46e-06	0.0137	CACAGCTGGT
PCGF2	hTFtarget	NW_012015244.1:18944122-18946122	396	417	+	14.9342	3.46e-06	0.0136	GCCTCCCTCTCTCTTCTTACCC
FOXQ1	database	NW_012015244.1:18944122-18946122	1215	1226	+	16.051	3.53e-06	0.0132	CATTGTTTATAC
FOXQ1	database	NW_012015244.1:18944122-18946122	1215	1226	-	16.051	3.53e-06	0.0132	GTATAAACAATG
NANOG	hTFtarget	NW_012015244.1:18944122-18946122	1921	1932	+	14.7571	3.56e-06	0.0141	CTCTGCAGGTGG
EP300	hTFtarget	NW_012015244.1:18944122-18946122	468	477	-	13.8182	3.56e-06	0.0133	TGTGCAAACA
TP53	hTFtarget	NW_012015244.1:18944122-18946122	472	493	+	14.5128	3.59e-06	0.00895	TGCACATGAGGAAGACTGGAAG
TP53	hTFtarget	NW_012015244.1:18944122-18946122	704	719	-	14.4853	3.62e-06	0.0137	GAAAGAGTCAAAGAGA
EP300	hTFtarget	NW_012015244.1:18944122-18946122	303	321	-	6.38158	3.64e-06	0.0137	TTTTTATTACATCCTTTAT
IRF5	hTFtarget	NW_012015244.1:18944122-18946122	753	768	+	11.9221	3.67e-06	0.0016	AAAAAAAAAAATTCCT
ZBTB33	hTFtarget	NW_012015244.1:18944122-18946122	1153	1168	-	15.026	3.7e-06	0.0143	CACCTTTTTAAAACAT
BTAF1	hTFtarget	NW_012015244.1:18944122-18946122	317	332	+	15	3.75e-06	0.00171	AAAAACTGAAAAAAAA
FLI1	hTFtarget	NW_012015244.1:18944122-18946122	682	697	-	7.95714	3.79e-06	0.0145	GAAGGGAAGGAAGTCA
AR	hTFtarget	NW_012015244.1:18944122-18946122	458	479	-	14.7606	3.87e-06	0.0139	CATGTGCAAACAGAAAGAAACC
TP53	hTFtarget	NW_012015244.1:18944122-18946122	473	488	+	14.3158	3.94e-06	0.0149	GCACATGAGGAAGACT
SPI1	database	NW_012015244.1:18944122-18946122	137	153	+	15.0102	3.94e-06	0.015	GAGAAGCAGAAGTGACA
SPI1	database	NW_012015244.1:18944122-18946122	137	153	+	15.0364	3.96e-06	0.0149	GAGAAGCAGAAGTGACA
SP1	hTFtarget	NW_012015244.1:18944122-18946122	138	153	+	14.3158	3.97e-06	0.0152	AGAAGCAGAAGTGACA
ZBTB17	hTFtarget	NW_012015244.1:18944122-18946122	296	317	-	13	3.99e-06	0.015	TATTACATCCTTTATTTTTCAG
AR	hTFtarget	NW_012015244.1:18944122-18946122	935	950	-	14.6061	4.01e-06	0.0155	AAGCACAATGTGTGCT
AR	hTFtarget	NW_012015244.1:18944122-18946122	935	950	-	14.7183	4.02e-06	0.0158	AAGCACAATGTGTGCT
NKX3-1	hTFtarget	NW_012015244.1:18944122-18946122	1633	1641	+	13.7286	4.03e-06	0.0161	AAGCACTCA
SPI1	hTFtarget	NW_012015244.1:18944122-18946122	137	154	+	14.6667	4.03e-06	0.0156	GAGAAGCAGAAGTGACAG
SMAD3	hTFtarget	NW_012015244.1:18944122-18946122	1102	1113	-	15.0429	4.05e-06	0.0161	AGGAGCCAGACT
DMRT1	database	NW_012015244.1:18944122-18946122	1209	1223	+	14.4796	4.06e-06	0.0146	CAGTTACATTGTTTA
GTF2I	hTFtarget	NW_012015244.1:18944122-18946122	394	402	+	14.9286	4.06e-06	0.0162	CAGCCTCCC
AR	hTFtarget	NW_012015244.1:18944122-18946122	935	950	-	14.5758	4.12e-06	0.0157	AAGCACAATGTGTGCT
EWSR1	hTFtarget	NW_012015244.1:18944122-18946122	685	696	+	14.6	4.13e-06	0.0162	CTTCCTTCCCTT
CDK9	hTFtarget	NW_012015244.1:18944122-18946122	747	762	+	14.8205	4.13e-06	0.00776	AAAAAAAAAAAAAAAA
CDK9	hTFtarget	NW_012015244.1:18944122-18946122	748	763	+	14.8205	4.13e-06	0.00776	AAAAAAAAAAAAAAAA
AR	hTFtarget	NW_012015244.1:18944122-18946122	935	950	-	14.7424	4.21e-06	0.0161	AAGCACAATGTGTGCT
GTF2I	hTFtarget	NW_012015244.1:18944122-18946122	1906	1921	+	14.0921	4.25e-06	0.0167	TTTAGGCCCTGGGGAC
SPI1	hTFtarget	NW_012015244.1:18944122-18946122	1574	1598	+	14.6429	4.27e-06	0.0169	GCCCTGCTTGTTCCACCCCCCAGGC
NFE2	hTFtarget	NW_012015244.1:18944122-18946122	399	420	+	14.6282	4.3e-06	0.0164	TCCCTCTCTCTTCTTACCCTCT
AR	hTFtarget	NW_012015244.1:18944122-18946122	934	949	+	15.0658	4.35e-06	0.0167	GAGCACACATTGTGCT
SP2	hTFtarget	NW_012015244.1:18944122-18946122	749	764	-	14.5139	4.38e-06	0.00378	ATTTTTTTTTTTTTTT
AR	hTFtarget	NW_012015244.1:18944122-18946122	935	950	+	14.4697	4.39e-06	0.0114	AGCACACATTGTGCTT
SPI1	hTFtarget	NW_012015244.1:18944122-18946122	136	153	-	14.4545	4.42e-06	0.0174	TGTCACTTCTGCTTCTCT
HOXA9	hTFtarget	NW_012015244.1:18944122-18946122	573	581	-	14.6316	4.46e-06	0.00882	CCCAGGGGA
PBX1	hTFtarget	NW_012015244.1:18944122-18946122	573	581	-	15.8553	4.46e-06	0.00885	CCCAGGGGA
EP300	hTFtarget	NW_012015244.1:18944122-18946122	573	581	-	14.8714	4.46e-06	0.00884	CCCAGGGGA
SPIB	hTFtarget	NW_012015244.1:18944122-18946122	136	153	+	14.2121	4.5e-06	0.0175	AGAGAAGCAGAAGTGACA
TCF3	database	NW_012015244.1:18944122-18946122	1763	1773	-	14.2763	4.52e-06	0.0179	ACCAGATGTTT
TCF3	database	NW_012015244.1:18944122-18946122	1763	1773	+	14.2449	4.52e-06	0.0179	AAACATCTGGT
EZH2	hTFtarget	NW_012015244.1:18944122-18946122	307	328	+	12.8256	4.53e-06	0.0166	AGGATGTAATAAAAACTGAAAA
AR	hTFtarget	NW_012015244.1:18944122-18946122	935	950	-	14.8421	4.59e-06	0.018	AAGCACAATGTGTGCT
NANOG	hTFtarget	NW_012015244.1:18944122-18946122	1111	1121	-	14.6753	4.59e-06	0.0173	ACAGACAAAGG
ZNF263	hTFtarget	NW_012015244.1:18944122-18946122	401	422	-	14.4545	4.6e-06	0.0175	GCAGAGGGTAAGAAGAGAGAGG
TP53	hTFtarget	NW_012015244.1:18944122-18946122	690	701	-	14.5513	4.65e-06	0.0176	CAGGGAAGGGAA
IRF4	database	NW_012015244.1:18944122-18946122	747	762	+	14.8475	4.67e-06	0.00884	AAAAAAAAAAAAAAAA
IRF4	database	NW_012015244.1:18944122-18946122	748	763	+	14.8475	4.67e-06	0.00884	AAAAAAAAAAAAAAAA
EZH2	hTFtarget	NW_012015244.1:18944122-18946122	911	922	+	14.6056	4.67e-06	0.0179	CATGAAATGGAA
FOXA2	hTFtarget	NW_012015244.1:18944122-18946122	468	477	+	14.0789	4.67e-06	0.0179	TGTTTGCACA
TP53	hTFtarget	NW_012015244.1:18944122-18946122	1101	1122	-	14.0385	4.69e-06	0.00895	CACAGACAAAGGAGCCAGACTG
AR	hTFtarget	NW_012015244.1:18944122-18946122	934	949	-	15.0263	4.69e-06	0.014	AGCACAATGTGTGCTC
AR	hTFtarget	NW_012015244.1:18944122-18946122	458	479	-	14.6623	4.7e-06	0.0167	CATGTGCAAACAGAAAGAAACC
IRF4	database	NW_012015244.1:18944122-18946122	747	762	+	14.7921	4.72e-06	0.00885	AAAAAAAAAAAAAAAA
IRF4	database	NW_012015244.1:18944122-18946122	748	763	+	14.7921	4.72e-06	0.00885	AAAAAAAAAAAAAAAA
NANOG	hTFtarget	NW_012015244.1:18944122-18946122	1110	1121	+	13.9722	4.74e-06	0.018	TCCTTTGTCTGT
USF1	hTFtarget	NW_012015244.1:18944122-18946122	139	154	-	14.6071	4.79e-06	0.018	CTGTCACTTCTGCTTC
SETDB1	hTFtarget	NW_012015244.1:18944122-18946122	158	173	-	12.8816	4.8e-06	0.0155	ACAGGGTTTGTCTCCC
HNF4A	hTFtarget	NW_012015244.1:18944122-18946122	1442	1453	-	14.5	4.82e-06	0.0188	GTCTGCCCTCTG
CBX3	hTFtarget	NW_012015244.1:18944122-18946122	88	109	-	14.5128	4.82e-06	0.0178	CCACAGAGCAGCATTCACCAGC
AR	hTFtarget	NW_012015244.1:18944122-18946122	935	950	+	14.4545	4.87e-06	0.0189	AGCACACATTGTGCTT
HIF1A	hTFtarget	NW_012015244.1:18944122-18946122	393	410	+	9.31579	4.87e-06	0.0187	GCAGCCTCCCTCTCTCTT
TAL1	hTFtarget	NW_012015244.1:18944122-18946122	723	734	+	14.8947	4.89e-06	0.0191	CTGGTGCTTCCT
OVOL1	database	NW_012015244.1:18944122-18946122	1208	1216	-	14.2857	4.91e-06	0.0189	TGTAACTGT
AR	hTFtarget	NW_012015244.1:18944122-18946122	935	950	-	14.3636	4.91e-06	0.0187	AAGCACAATGTGTGCT
CREB1	hTFtarget	NW_012015244.1:18944122-18946122	1253	1261	-	14.8421	4.91e-06	0.0195	ATGACATCA
CREBBP	hTFtarget	NW_012015244.1:18944122-18946122	1253	1261	-	14	4.91e-06	0.0187	ATGACATCA
OVOL1	database	NW_012015244.1:18944122-18946122	1208	1216	-	14.37	4.91e-06	0.0189	TGTAACTGT
GTF2I	database	NW_012015244.1:18944122-18946122	397	405	-	14.9024	4.95e-06	0.0197	AGAGGGAGG
SMAD2/SMAD3	hTFtarget	NW_012015244.1:18944122-18946122	1102	1113	-	14.7429	4.96e-06	0.0197	AGGAGCCAGACT
AR	hTFtarget	NW_012015244.1:18944122-18946122	935	950	+	14.1667	4.98e-06	0.019	AGCACACATTGTGCTT
GATA1	hTFtarget	NW_012015244.1:18944122-18946122	82	93	+	14.6579	5.04e-06	0.02	CTTCCAGCTGGT
PHF8	hTFtarget	NW_012015244.1:18944122-18946122	1850	1865	+	14.5789	5.05e-06	0.02	GAAGCTGTGGCAGCAG
AR	hTFtarget	NW_012015244.1:18944122-18946122	935	950	-	14.2714	5.07e-06	0.0191	AAGCACAATGTGTGCT
AR	hTFtarget	NW_012015244.1:18944122-18946122	935	950	-	14.4394	5.07e-06	0.0179	AAGCACAATGTGTGCT
NKX6-1	database	NW_012015244.1:18944122-18946122	339	354	+	13.9653	5.11e-06	0.00927	AATAATTAATAACTTC
EBF1	database	NW_012015244.1:18944122-18946122	1911	1921	-	15.0851	5.15e-06	0.0202	GTCCCCAGGGC
AR	hTFtarget	NW_012015244.1:18944122-18946122	935	950	+	14.5303	5.17e-06	0.0159	AGCACACATTGTGCTT
ZBTB18	database	NW_012015244.1:18944122-18946122	1808	1821	+	14.7857	5.23e-06	0.0207	TACAGATGTTGGTG
ZNF238	database	NW_012015244.1:18944122-18946122	1808	1821	+	14.7857	5.23e-06	0.0207	TACAGATGTTGGTG
SOX9	database	NW_012015244.1:18944122-18946122	1439	1449	+	13.1743	5.24e-06	0.0204	AAACAGAGGGC
AR	hTFtarget	NW_012015244.1:18944122-18946122	935	950	+	14.2727	5.24e-06	0.0202	AGCACACATTGTGCTT
TOP1	hTFtarget	NW_012015244.1:18944122-18946122	420	431	-	14.2763	5.27e-06	0.0174	CAGTCACAGGCA
FOXP4	database	NW_012015244.1:18944122-18946122	752	766	+	14.1881	5.3e-06	0.00689	AAAAAAAAAAAATTC
VEZF1	hTFtarget	NW_012015244.1:18944122-18946122	397	418	+	14	5.38e-06	0.0212	CCTCCCTCTCTCTTCTTACCCT
SRF	hTFtarget	NW_012015244.1:18944122-18946122	686	697	-	14.5789	5.41e-06	0.0206	GAAGGGAAGGAA
SP2	hTFtarget	NW_012015244.1:18944122-18946122	750	765	-	14.2917	5.42e-06	0.00378	AATTTTTTTTTTTTTT
EZH1	hTFtarget	NW_012015244.1:18944122-18946122	911	922	+	14.7013	5.43e-06	0.0213	CATGAAATGGAA
FLI1	hTFtarget	NW_012015244.1:18944122-18946122	689	700	-	14.3947	5.43e-06	0.0213	AGGGAAGGGAAG
MED1	hTFtarget	NW_012015244.1:18944122-18946122	1860	1868	-	13.4571	5.43e-06	0.0108	CACCTGCTG
EP300	hTFtarget	NW_012015244.1:18944122-18946122	1066	1074	+	14.6184	5.43e-06	0.0215	CACAGCTGG
EZH2	hTFtarget	NW_012015244.1:18944122-18946122	685	700	+	13.6753	5.47e-06	0.0209	CTTCCTTCCCTTCCCT
CDX2	hTFtarget	NW_012015244.1:18944122-18946122	309	320	+	13.5373	5.47e-06	0.021	GATGTAATAAAA
EP300	hTFtarget	NW_012015244.1:18944122-18946122	1575	1599	+	13.0395	5.49e-06	0.0217	CCCTGCTTGTTCCACCCCCCAGGCC
AR	hTFtarget	NW_012015244.1:18944122-18946122	458	476	+	14.5352	5.51e-06	0.0204	GGTTTCTTTCTGTTTGCAC
EP300	hTFtarget	NW_012015244.1:18944122-18946122	304	317	+	12.2429	5.51e-06	0.021	TAAAGGATGTAATA
AR	hTFtarget	NW_012015244.1:18944122-18946122	935	950	+	14.0606	5.54e-06	0.021	AGCACACATTGTGCTT
KDM1A	hTFtarget	NW_012015244.1:18944122-18946122	1575	1596	-	14.2254	5.56e-06	0.0219	CTGGGGGGTGGAACAAGCAGGG
TP53	hTFtarget	NW_012015244.1:18944122-18946122	474	489	-	14.4545	5.56e-06	0.0188	CAGTCTTCCTCATGTG
SPIB	hTFtarget	NW_012015244.1:18944122-18946122	138	153	-	14.4587	5.6e-06	0.0216	TGTCACTTCTGCTTCT
USF1	hTFtarget	NW_012015244.1:18944122-18946122	1003	1027	-	2.01316	5.6e-06	0.022	GGACTCTACTTCACAGGGTTCTGTG
EP300	hTFtarget	NW_012015244.1:18944122-18946122	287	301	-	13.7051	5.6e-06	0.021	TTTCAGTGTTAGTGT
EP300	hTFtarget	NW_012015244.1:18944122-18946122	549	564	+	10.2	5.61e-06	0.0219	AAGATAGATATCCCAA
RP58	database	NW_012015244.1:18944122-18946122	1808	1819	-	15.4079	5.64e-06	0.0223	CCAACATCTGTA
SOX4	database	NW_012015244.1:18944122-18946122	1437	1448	+	14.6972	5.67e-06	0.0219	GAAAACAGAGGG
SOX4	database	NW_012015244.1:18944122-18946122	1437	1448	+	14.7449	5.67e-06	0.0218	GAAAACAGAGGG
AR	hTFtarget	NW_012015244.1:18944122-18946122	935	950	-	14.3788	5.74e-06	0.0211	AAGCACAATGTGTGCT
FOXP4	database	NW_012015244.1:18944122-18946122	321	335	+	14.1386	5.75e-06	0.00689	ACTGAAAAAAAATGA
GTF3C2	hTFtarget	NW_012015244.1:18944122-18946122	741	765	+	11.1688	5.78e-06	0.00633	ACCACCAAAAAAAAAAAAAAAAATT
AR	hTFtarget	NW_012015244.1:18944122-18946122	935	950	+	14.1061	5.8e-06	0.0224	AGCACACATTGTGCTT
MYC	hTFtarget	NW_012015244.1:18944122-18946122	150	168	+	-0.815789	5.83e-06	0.0227	GACAGGTAGGGAGACAAAC
AR	hTFtarget	NW_012015244.1:18944122-18946122	935	950	+	14.3333	5.84e-06	0.0226	AGCACACATTGTGCTT
PIAS1	hTFtarget	NW_012015244.1:18944122-18946122	935	950	+	14.0455	5.85e-06	0.0219	AGCACACATTGTGCTT
TFAP2C	database	NW_012015244.1:18944122-18946122	1590	1598	-	14.4355	5.9e-06	0.0234	GCCTGGGGG
BRD4	hTFtarget	NW_012015244.1:18944122-18946122	694	718	-	14.4805	5.9e-06	0.0227	AAAGAGTCAAAGAGATTCAGGGAAG
BRD4	hTFtarget	NW_012015244.1:18944122-18946122	198	209	+	14.0658	5.9e-06	0.0232	GATCCTTTCTTT
TFAP2C	database	NW_012015244.1:18944122-18946122	1590	1598	-	14.4184	5.9e-06	0.0234	GCCTGGGGG
ASCL1	hTFtarget	NW_012015244.1:18944122-18946122	1858	1880	+	14.0789	5.94e-06	0.0234	GGCAGCAGGTGTGATTACTTCAG
AR	hTFtarget	NW_012015244.1:18944122-18946122	934	949	-	14.1515	5.97e-06	0.0114	AGCACAATGTGTGCTC
FOXM1	hTFtarget	NW_012015244.1:18944122-18946122	319	327	+	14.3421	5.98e-06	0.0224	AAACTGAAA
VDR	hTFtarget	NW_012015244.1:18944122-18946122	319	327	+	14.0395	5.98e-06	0.0224	AAACTGAAA
TCF12	database	NW_012015244.1:18944122-18946122	1861	1869	+	14.9836	6.03e-06	0.0238	AGCAGGTGT
SIN3A	hTFtarget	NW_012015244.1:18944122-18946122	85	93	-	14.5658	6.03e-06	0.0238	ACCAGCTGG
TCF12	database	NW_012015244.1:18944122-18946122	1861	1869	+	14.9082	6.03e-06	0.0239	AGCAGGTGT
AR	hTFtarget	NW_012015244.1:18944122-18946122	934	949	+	14.2143	6.04e-06	0.0118	GAGCACACATTGTGCT
AR	hTFtarget	NW_012015244.1:18944122-18946122	935	950	-	14.2143	6.04e-06	0.0118	AAGCACAATGTGTGCT
SP2	hTFtarget	NW_012015244.1:18944122-18946122	744	759	-	14.1806	6.05e-06	0.00378	TTTTTTTTTTTTTGGT
FLI1	hTFtarget	NW_012015244.1:18944122-18946122	680	697	-	-2.06061	6.06e-06	0.0233	GAAGGGAAGGAAGTCAGT
MAZ	database	NW_012015244.1:18944122-18946122	396	412	-	14.2551	6.14e-06	0.0243	AGAAGAGAGAGGGAGGC
MAZ	database	NW_012015244.1:18944122-18946122	396	412	-	14.2584	6.15e-06	0.0244	AGAAGAGAGAGGGAGGC
EP300	hTFtarget	NW_012015244.1:18944122-18946122	549	564	+	9.95714	6.2e-06	0.0241	AAGATAGATATCCCAA
ZNF143	hTFtarget	NW_012015244.1:18944122-18946122	305	320	-	14.0513	6.21e-06	0.0224	TTTTATTACATCCTTT
NR3C1	hTFtarget	NW_012015244.1:18944122-18946122	934	949	-	14.4571	6.22e-06	0.0238	AGCACAATGTGTGCTC
SPI1	hTFtarget	NW_012015244.1:18944122-18946122	1002	1026	+	13.9868	6.24e-06	0.0247	CCACAGAACCCTGTGAAGTAGAGTC
TCF12	hTFtarget	NW_012015244.1:18944122-18946122	1856	1871	-	14.5	6.32e-06	0.025	TCACACCTGCTGCCAC
NANOG	hTFtarget	NW_012015244.1:18944122-18946122	1110	1121	-	13.25	6.33e-06	0.0244	ACAGACAAAGGA
TFAP2B	database	NW_012015244.1:18944122-18946122	1589	1598	-	14.0225	6.35e-06	0.0252	GCCTGGGGGG
TFAP2B	database	NW_012015244.1:18944122-18946122	1589	1598	+	14.0306	6.35e-06	0.0252	CCCCCCAGGC
AR	hTFtarget	NW_012015244.1:18944122-18946122	934	949	-	14.6316	6.36e-06	0.0244	AGCACAATGTGTGCTC
BTAF1	hTFtarget	NW_012015244.1:18944122-18946122	744	759	+	14.3077	6.36e-06	0.00258	ACCAAAAAAAAAAAAA
ZNF143	hTFtarget	NW_012015244.1:18944122-18946122	740	764	-	13.641	6.36e-06	0.00756	ATTTTTTTTTTTTTTTTTGGTGGTG
FOXA1	hTFtarget	NW_012015244.1:18944122-18946122	468	479	-	13.4861	6.44e-06	0.0241	CATGTGCAAACA
SMARCA4	hTFtarget	NW_012015244.1:18944122-18946122	745	760	+	14.25	6.44e-06	0.00568	CCAAAAAAAAAAAAAA
AR	hTFtarget	NW_012015244.1:18944122-18946122	935	950	+	14.3857	6.44e-06	0.0123	AGCACACATTGTGCTT
ZBTB17	hTFtarget	NW_012015244.1:18944122-18946122	480	504	+	12.3158	6.5e-06	0.025	AGGAAGACTGGAAGTGCTAGGGGTT
CTBP2	hTFtarget	NW_012015244.1:18944122-18946122	398	413	-	14.2571	6.55e-06	0.0257	AAGAAGAGAGAGGGAG
TBX5	database	NW_012015244.1:18944122-18946122	1863	1872	-	15	6.59e-06	0.026	ATCACACCTG
EP300	hTFtarget	NW_012015244.1:18944122-18946122	139	154	+	14.2632	6.6e-06	0.024	GAAGCAGAAGTGACAG
TAL1	database	NW_012015244.1:18944122-18946122	84	93	+	14.8211	6.61e-06	0.0263	TCCAGCTGGT
ZBTB17	hTFtarget	NW_012015244.1:18944122-18946122	301	319	+	9.51316	6.62e-06	0.025	AAATAAAGGATGTAATAAA
FOXA2	hTFtarget	NW_012015244.1:18944122-18946122	468	479	-	13.961	6.64e-06	0.026	CATGTGCAAACA
CEBPB	hTFtarget	NW_012015244.1:18944122-18946122	317	328	+	14.7368	6.64e-06	0.0251	AAAAACTGAAAA
TP53	hTFtarget	NW_012015244.1:18944122-18946122	474	489	+	13.8816	6.65e-06	0.0255	CACATGAGGAAGACTG
TAL1	hTFtarget	NW_012015244.1:18944122-18946122	723	734	+	14.4805	6.66e-06	0.0261	CTGGTGCTTCCT
BCL6	hTFtarget	NW_012015244.1:18944122-18946122	1952	1963	+	13.9857	6.68e-06	0.0264	ATAAAAGGAAGT
CDX2	hTFtarget	NW_012015244.1:18944122-18946122	468	479	-	14.4416	6.72e-06	0.0252	CATGTGCAAACA
MED1	hTFtarget	NW_012015244.1:18944122-18946122	312	327	-	14.2338	6.75e-06	0.0113	TTTCAGTTTTTATTAC
RXRA	hTFtarget	NW_012015244.1:18944122-18946122	913	927	-	13.3816	6.75e-06	0.0256	TTTATTTCCATTTCA
SPI1	hTFtarget	NW_012015244.1:18944122-18946122	1579	1594	+	14.6711	6.84e-06	0.0272	GCTTGTTCCACCCCCC
AR	hTFtarget	NW_012015244.1:18944122-18946122	458	478	+	13.8732	6.85e-06	0.0263	GGTTTCTTTCTGTTTGCACAT
VDR	hTFtarget	NW_012015244.1:18944122-18946122	318	329	-	14.2208	6.87e-06	0.026	TTTTTCAGTTTT
PAX5	database	NW_012015244.1:18944122-18946122	136	145	+	10.9663	6.91e-06	0.0272	AGAGAAGCAG
FOXA2	hTFtarget	NW_012015244.1:18944122-18946122	835	845	+	13.5974	6.92e-06	0.0258	CTGAACAAATA
EP300	hTFtarget	NW_012015244.1:18944122-18946122	139	154	+	14.2429	6.96e-06	0.0262	GAAGCAGAAGTGACAG
JUN	hTFtarget	NW_012015244.1:18944122-18946122	1183	1194	-	14.3506	6.98e-06	0.0276	ATGATATCATGC
SPI1	hTFtarget	NW_012015244.1:18944122-18946122	138	153	+	13.4242	6.99e-06	0.027	AGAAGCAGAAGTGACA
NANOG	hTFtarget	NW_012015244.1:18944122-18946122	1110	1121	-	13.6528	7.1e-06	0.0266	ACAGACAAAGGA
POU3F2	database	NW_012015244.1:18944122-18946122	57	70	+	11.92	7.12e-06	0.0148	TTAAATATATTAAT
GLYR1	hTFtarget	NW_012015244.1:18944122-18946122	198	217	+	12.2771	7.13e-06	0.0256	GATCCTTTCTTTAATCAAAA
AR	hTFtarget	NW_012015244.1:18944122-18946122	934	949	-	14.1515	7.14e-06	0.0226	AGCACAATGTGTGCTC
TRIM28	hTFtarget	NW_012015244.1:18944122-18946122	317	341	-	12.7738	7.17e-06	0.0261	ATTCCCTCATTTTTTTTCAGTTTTT
MYC	hTFtarget	NW_012015244.1:18944122-18946122	139	153	-	14.0779	7.19e-06	0.0265	TGTCACTTCTGCTTC
TBL1XR1	hTFtarget	NW_012015244.1:18944122-18946122	313	328	+	14.0423	7.22e-06	0.026	TAATAAAAACTGAAAA
TP53	hTFtarget	NW_012015244.1:18944122-18946122	399	410	-	13.3023	7.23e-06	0.0278	AAGAGAGAGGGA
SPI1	hTFtarget	NW_012015244.1:18944122-18946122	1950	1965	+	13.2576	7.25e-06	0.0189	AAATAAAAGGAAGTCT
AR	hTFtarget	NW_012015244.1:18944122-18946122	928	948	+	13.8939	7.27e-06	0.0285	AATGATGAGCACACATTGTGC
ERG	hTFtarget	NW_012015244.1:18944122-18946122	396	420	+	-12.6447	7.28e-06	0.0269	GCCTCCCTCTCTCTTCTTACCCTCT
HOXD12	database	NW_012015244.1:18944122-18946122	312	320	-	13.1765	7.28e-06	0.0278	TTTTATTAC
SPI1	hTFtarget	NW_012015244.1:18944122-18946122	138	154	+	13.5909	7.34e-06	0.0283	AGAAGCAGAAGTGACAG
CTCF	hTFtarget	NW_012015244.1:18944122-18946122	1939	1947	-	14.5	7.34e-06	0.0282	AGAACTGCA
CTCF	hTFtarget	NW_012015244.1:18944122-18946122	1939	1947	-	14.4079	7.34e-06	0.0293	AGAACTGCA
CTCF	hTFtarget	NW_012015244.1:18944122-18946122	1939	1947	-	14.2895	7.34e-06	0.0291	AGAACTGCA
CTCF	hTFtarget	NW_012015244.1:18944122-18946122	1939	1947	-	14.1842	7.34e-06	0.0287	AGAACTGCA
E2F7	hTFtarget	NW_012015244.1:18944122-18946122	1065	1073	+	14.6711	7.34e-06	0.029	ACACAGCTG
AR	hTFtarget	NW_012015244.1:18944122-18946122	935	950	+	14.4211	7.35e-06	0.014	AGCACACATTGTGCTT
FOXP1	database	NW_012015244.1:18944122-18946122	1432	1446	+	14.43	7.36e-06	0.0275	CTTAGGAAAACAGAG
ELF1	hTFtarget	NW_012015244.1:18944122-18946122	606	621	+	14.3026	7.37e-06	0.0292	ACACCATCACCCAGAG
FOXP1	database	NW_012015244.1:18944122-18946122	1432	1446	+	14.4366	7.38e-06	0.0275	CTTAGGAAAACAGAG
CDK8	hTFtarget	NW_012015244.1:18944122-18946122	747	762	-	14.0519	7.39e-06	0.00938	TTTTTTTTTTTTTTTT
CDK8	hTFtarget	NW_012015244.1:18944122-18946122	748	763	-	14.0519	7.39e-06	0.00938	TTTTTTTTTTTTTTTT
EZH2	hTFtarget	NW_012015244.1:18944122-18946122	719	734	-	13.75	7.4e-06	0.0291	AGGAAGCACCAGCAGG
BCL11A	hTFtarget	NW_012015244.1:18944122-18946122	139	154	+	14.25	7.41e-06	0.028	GAAGCAGAAGTGACAG
SPI1	hTFtarget	NW_012015244.1:18944122-18946122	137	154	-	13.2727	7.43e-06	0.0186	CTGTCACTTCTGCTTCTC
FLI1	hTFtarget	NW_012015244.1:18944122-18946122	681	696	+	14.303	7.52e-06	0.0298	CTGACTTCCTTCCCTT
TCF12	hTFtarget	NW_012015244.1:18944122-18946122	1860	1869	+	14.5152	7.53e-06	0.0232	CAGCAGGTGT
YY1	hTFtarget	NW_012015244.1:18944122-18946122	1853	1868	-	13.5263	7.54e-06	0.0299	CACCTGCTGCCACAGC
ELF1	hTFtarget	NW_012015244.1:18944122-18946122	688	703	+	14.0395	7.56e-06	0.03	CCTTCCCTTCCCTGAA
SPI1	hTFtarget	NW_012015244.1:18944122-18946122	606	621	+	13.9474	7.58e-06	0.0301	ACACCATCACCCAGAG
FOXA1	hTFtarget	NW_012015244.1:18944122-18946122	934	949	-	13.9737	7.61e-06	0.0298	AGCACAATGTGTGCTC
PML	hTFtarget	NW_012015244.1:18944122-18946122	680	695	-	13.9286	7.67e-06	0.03	AGGGAAGGAAGTCAGT
SMAD3	hTFtarget	NW_012015244.1:18944122-18946122	1066	1074	+	14.2763	7.67e-06	0.0304	CACAGCTGG
MED1	hTFtarget	NW_012015244.1:18944122-18946122	139	154	+	13.9577	7.68e-06	0.029	GAAGCAGAAGTGACAG
TFAP2A	database	NW_012015244.1:18944122-18946122	1590	1598	-	14.1897	7.73e-06	0.0308	GCCTGGGGG
TFAP2A	database	NW_012015244.1:18944122-18946122	1590	1598	+	14.1515	7.73e-06	0.0307	CCCCCAGGC
ESR1	hTFtarget	NW_012015244.1:18944122-18946122	684	699	+	13.5195	7.74e-06	0.0273	ACTTCCTTCCCTTCCC
MAZ	hTFtarget	NW_012015244.1:18944122-18946122	398	419	-	13.0857	7.76e-06	0.0306	GAGGGTAAGAAGAGAGAGGGAG
PAX6	hTFtarget	NW_012015244.1:18944122-18946122	909	924	-	14.0779	7.77e-06	0.0266	ATTTCCATTTCATGGG
RUNX1	hTFtarget	NW_012015244.1:18944122-18946122	137	151	-	14.1711	7.77e-06	0.0297	TCACTTCTGCTTCTC
RXRG	hTFtarget	NW_012015244.1:18944122-18946122	682	693	+	13.6857	7.77e-06	0.0307	TGACTTCCTTCC
SIN3A	hTFtarget	NW_012015244.1:18944122-18946122	466	478	+	13.625	7.78e-06	0.0278	TCTGTTTGCACAT
IRF5	hTFtarget	NW_012015244.1:18944122-18946122	394	412	+	10.8947	7.8e-06	0.0306	CAGCCTCCCTCTCTCTTCT
AR	hTFtarget	NW_012015244.1:18944122-18946122	935	950	-	13.7576	7.81e-06	0.0204	AAGCACAATGTGTGCT
SPI1	hTFtarget	NW_012015244.1:18944122-18946122	606	621	+	14.0132	7.82e-06	0.031	ACACCATCACCCAGAG
EHF	hTFtarget	NW_012015244.1:18944122-18946122	390	411	-	13.9041	7.82e-06	0.0202	GAAGAGAGAGGGAGGCTGCTGA
SPIB	hTFtarget	NW_012015244.1:18944122-18946122	138	153	-	14.0789	7.88e-06	0.0307	TGTCACTTCTGCTTCT
SETDB1	hTFtarget	NW_012015244.1:18944122-18946122	898	913	-	11.7368	7.89e-06	0.0155	ATGGGGTTTTTTTCCC
SPI1	hTFtarget	NW_012015244.1:18944122-18946122	136	151	+	13.0606	7.93e-06	0.0306	AGAGAAGCAGAAGTGA
ESR1	hTFtarget	NW_012015244.1:18944122-18946122	696	720	-	13.4328	7.94e-06	0.0202	GGAAAGAGTCAAAGAGATTCAGGGA
ZNF384	hTFtarget	NW_012015244.1:18944122-18946122	743	767	+	7.05556	7.94e-06	0.00361	CACCAAAAAAAAAAAAAAAAATTCC
AR	hTFtarget	NW_012015244.1:18944122-18946122	935	950	-	13.7576	8.02e-06	0.0272	AAGCACAATGTGTGCT
TAF1	hTFtarget	NW_012015244.1:18944122-18946122	397	420	-	13.9211	8.03e-06	0.0169	AGAGGGTAAGAAGAGAGAGGGAGG
ZEB1	database	NW_012015244.1:18944122-18946122	780	788	+	11.6422	8.06e-06	0.0321	CTGTTTCTG
EOMES	database	NW_012015244.1:18944122-18946122	1864	1872	+	13.6364	8.06e-06	0.0321	AGGTGTGAT
AR	hTFtarget	NW_012015244.1:18944122-18946122	467	475	-	12.5	8.06e-06	0.0313	TGCAAACAG
FOXA2	hTFtarget	NW_012015244.1:18944122-18946122	1066	1074	+	14.1447	8.15e-06	0.0324	CACAGCTGG
SOX17	hTFtarget	NW_012015244.1:18944122-18946122	1066	1074	+	14.3947	8.15e-06	0.0323	CACAGCTGG
POU4F3	database	NW_012015244.1:18944122-18946122	336	351	+	13.8898	8.15e-06	0.0288	GGGAATAATTAATAAC
USF1	hTFtarget	NW_012015244.1:18944122-18946122	1003	1026	-	3.81429	8.2e-06	0.0319	GACTCTACTTCACAGGGTTCTGTG
GTF2I	hTFtarget	NW_012015244.1:18944122-18946122	1060	1078	+	12.5132	8.22e-06	0.0319	AGTTTACACAGCTGGTAAA
ZNF143	hTFtarget	NW_012015244.1:18944122-18946122	389	408	+	13.2857	8.22e-06	0.0325	CTCAGCAGCCTCCCTCTCTC
AR	hTFtarget	NW_012015244.1:18944122-18946122	935	950	-	13.9342	8.24e-06	0.0318	AAGCACAATGTGTGCT
TP53	hTFtarget	NW_012015244.1:18944122-18946122	576	584	+	14.7895	8.26e-06	0.0329	CCTGGGCAG
SPI1	hTFtarget	NW_012015244.1:18944122-18946122	1579	1594	+	14.2286	8.31e-06	0.033	GCTTGTTCCACCCCCC
AR	hTFtarget	NW_012015244.1:18944122-18946122	934	949	-	13.9242	8.34e-06	0.0159	AGCACAATGTGTGCTC
MED1	hTFtarget	NW_012015244.1:18944122-18946122	313	328	+	13.987	8.4e-06	0.0168	TAATAAAAACTGAAAA
AR	hTFtarget	NW_012015244.1:18944122-18946122	934	949	+	13.9848	8.43e-06	0.0161	GAGCACACATTGTGCT
AR	hTFtarget	NW_012015244.1:18944122-18946122	934	949	+	13.9697	8.46e-06	0.016	GAGCACACATTGTGCT
ZNF92	hTFtarget	NW_012015244.1:18944122-18946122	895	919	-	12.9722	8.46e-06	0.0223	CATTTCATGGGGTTTTTTTCCCTTG
ERG	hTFtarget	NW_012015244.1:18944122-18946122	468	478	-	13.4028	8.46e-06	0.0323	ATGTGCAAACA
EP300	hTFtarget	NW_012015244.1:18944122-18946122	466	477	-	13.7403	8.47e-06	0.0311	TGTGCAAACAGA
PGR	hTFtarget	NW_012015244.1:18944122-18946122	934	949	-	13.8939	8.49e-06	0.0271	AGCACAATGTGTGCTC
MEIS1	hTFtarget	NW_012015244.1:18944122-18946122	1166	1177	+	13.7121	8.51e-06	0.0328	GTGATTTATTAG
ZNF143	hTFtarget	NW_012015244.1:18944122-18946122	737	761	-	13.3462	8.55e-06	0.00762	TTTTTTTTTTTTTTTGGTGGTGATT
MED1	hTFtarget	NW_012015244.1:18944122-18946122	139	154	-	13.8831	8.57e-06	0.0168	CTGTCACTTCTGCTTC
POU3F2	database	NW_012015244.1:18944122-18946122	34	47	-	11.29	8.59e-06	0.0148	CTGCACTAATTCAT
ATF2	hTFtarget	NW_012015244.1:18944122-18946122	317	328	-	14.2105	8.6e-06	0.0318	TTTTCAGTTTTT
BCL6	hTFtarget	NW_012015244.1:18944122-18946122	606	627	-	13.8421	8.61e-06	0.0341	ATAGACCTCTGGGTGATGGTGT
EP300	hTFtarget	NW_012015244.1:18944122-18946122	312	327	-	13.8684	8.63e-06	0.0323	TTTCAGTTTTTATTAC
SUMO2/SUMO3	hTFtarget	NW_012015244.1:18944122-18946122	326	347	+	13.641	8.64e-06	0.0145	AAAAAAATGAGGGAATAATTAA
TFAP2A	hTFtarget	NW_012015244.1:18944122-18946122	1586	1600	+	14.3143	8.64e-06	0.0342	CCACCCCCCAGGCCT
AR	hTFtarget	NW_012015244.1:18944122-18946122	935	950	-	14.1447	8.66e-06	0.0327	AAGCACAATGTGTGCT
AR	hTFtarget	NW_012015244.1:18944122-18946122	934	949	-	13.7273	8.68e-06	0.0209	AGCACAATGTGTGCTC
TAF1	hTFtarget	NW_012015244.1:18944122-18946122	140	163	+	13.8026	8.68e-06	0.0169	AAGCAGAAGTGACAGGTAGGGAGA
TP53	hTFtarget	NW_012015244.1:18944122-18946122	1106	1121	-	12.6447	8.69e-06	0.0164	ACAGACAAAGGAGCCA
AR	hTFtarget	NW_012015244.1:18944122-18946122	935	950	+	14.1212	8.69e-06	0.019	AGCACACATTGTGCTT
AR	hTFtarget	NW_012015244.1:18944122-18946122	398	413	-	13.7949	8.76e-06	0.0251	AAGAAGAGAGAGGGAG
HDAC2	hTFtarget	NW_012015244.1:18944122-18946122	716	727	+	14.1711	8.78e-06	0.0238	TTTCCTGCTGGT
ELF1	hTFtarget	NW_012015244.1:18944122-18946122	688	703	-	13.8289	8.82e-06	0.035	TTCAGGGAAGGGAAGG
CREB1	hTFtarget	NW_012015244.1:18944122-18946122	685	709	+	13.4257	8.86e-06	0.0209	CTTCCTTCCCTTCCCTGAATCTCTT
IRF4	hTFtarget	NW_012015244.1:18944122-18946122	139	154	-	13.8286	8.88e-06	0.0338	CTGTCACTTCTGCTTC
TOP1	hTFtarget	NW_012015244.1:18944122-18946122	185	196	-	13.7368	8.88e-06	0.0174	CAGAGACAGGTA
MTA3	hTFtarget	NW_012015244.1:18944122-18946122	914	929	-	13.974	8.91e-06	0.0269	TTTTTATTTCCATTTC
JUND	hTFtarget	NW_012015244.1:18944122-18946122	1253	1261	-	15.1316	8.94e-06	0.0352	ATGACATCA
MYB	hTFtarget	NW_012015244.1:18944122-18946122	1955	1963	+	13.4342	8.94e-06	0.0347	AAAGGAAGT
MYC	hTFtarget	NW_012015244.1:18944122-18946122	1111	1119	-	12.5974	8.94e-06	0.0329	AGACAAAGG
NANOG	hTFtarget	NW_012015244.1:18944122-18946122	1111	1119	-	13.0141	8.94e-06	0.034	AGACAAAGG
TEAD4	hTFtarget	NW_012015244.1:18944122-18946122	226	234	-	14.1184	8.94e-06	0.0344	AAATTCCAG
EP300	hTFtarget	NW_012015244.1:18944122-18946122	224	232	-	14.0263	8.94e-06	0.0344	ATTCCAGTC
FOXP4	database	NW_012015244.1:18944122-18946122	895	909	+	13.8515	8.97e-06	0.00689	CAAGGGAAAAAAACC
TP53	hTFtarget	NW_012015244.1:18944122-18946122	759	774	-	13.8442	8.98e-06	0.0351	GAGACAAGGAATTTTT
TRIM28	hTFtarget	NW_012015244.1:18944122-18946122	549	564	+	8.76316	9.01e-06	0.0357	AAGATAGATATCCCAA
ZBTB17	hTFtarget	NW_012015244.1:18944122-18946122	1009	1031	+	13.6711	9.04e-06	0.0357	ACCCTGTGAAGTAGAGTCCAGAG
ZBTB17	hTFtarget	NW_012015244.1:18944122-18946122	757	778	+	11.1447	9.04e-06	0.0169	AAAAAAATTCCTTGTCTCAAGC
REX1	database	NW_012015244.1:18944122-18946122	67	76	-	12.9592	9.05e-06	0.0347	TTAGCCATTA
HDAC2	hTFtarget	NW_012015244.1:18944122-18946122	462	477	+	13.4935	9.05e-06	0.0345	TCTTTCTGTTTGCACA
MED1	hTFtarget	NW_012015244.1:18944122-18946122	747	762	-	13.8831	9.1e-06	0.0113	TTTTTTTTTTTTTTTT
MED1	hTFtarget	NW_012015244.1:18944122-18946122	748	763	-	13.8831	9.1e-06	0.0113	TTTTTTTTTTTTTTTT
AR	hTFtarget	NW_012015244.1:18944122-18946122	934	949	+	13.5455	9.12e-06	0.0202	GAGCACACATTGTGCT
NFE2	database	NW_012015244.1:18944122-18946122	632	642	+	14.4495	9.18e-06	0.0365	AGCTGAGTCCC
YY1	hTFtarget	NW_012015244.1:18944122-18946122	1077	1088	-	14.0132	9.25e-06	0.0363	GGCTCCATCTTT
AR	hTFtarget	NW_012015244.1:18944122-18946122	468	479	-	13.4026	9.29e-06	0.0351	CATGTGCAAACA
MYC	hTFtarget	NW_012015244.1:18944122-18946122	766	787	-	9.72368	9.29e-06	0.0135	AGAAACAGAGCTTGAGACAAGG
AR	hTFtarget	NW_012015244.1:18944122-18946122	467	478	+	13.3056	9.3e-06	0.0362	CTGTTTGCACAT
ZBTB6	database	NW_012015244.1:18944122-18946122	1077	1089	-	14.0337	9.31e-06	0.037	GGGCTCCATCTTT
HIF1A	hTFtarget	NW_012015244.1:18944122-18946122	399	410	-	13.7662	9.32e-06	0.0357	AAGAGAGAGGGA
SPI1	hTFtarget	NW_012015244.1:18944122-18946122	1577	1594	-	13.75	9.32e-06	0.037	GGGGGGTGGAACAAGCAG
AR	hTFtarget	NW_012015244.1:18944122-18946122	934	949	+	13.7424	9.36e-06	0.0179	GAGCACACATTGTGCT
ARRB1	hTFtarget	NW_012015244.1:18944122-18946122	912	927	-	13.2078	9.4e-06	0.0365	TTTATTTCCATTTCAT
AR	hTFtarget	NW_012015244.1:18944122-18946122	935	950	+	13.5606	9.4e-06	0.0357	AGCACACATTGTGCTT
EZH1	hTFtarget	NW_012015244.1:18944122-18946122	916	927	+	13.4805	9.42e-06	0.0365	AATGGAAATAAA
AR	hTFtarget	NW_012015244.1:18944122-18946122	935	949	-	13.6364	9.42e-06	0.0285	AGCACAATGTGTGCT
TCF3	database	NW_012015244.1:18944122-18946122	1859	1873	+	14.3761	9.43e-06	0.0374	GCAGCAGGTGTGATT
AR	database	NW_012015244.1:18944122-18946122	936	950	-	14.1538	9.45e-06	0.0238	AAGCACAATGTGTGC
SPI1	hTFtarget	NW_012015244.1:18944122-18946122	138	153	-	13.6974	9.45e-06	0.0357	TGTCACTTCTGCTTCT
HOXD8	database	NW_012015244.1:18944122-18946122	59	75	+	13.0629	9.49e-06	0.0164	AAATATATTAATGGCTA
AR	hTFtarget	NW_012015244.1:18944122-18946122	926	948	-	13.4545	9.49e-06	0.0356	GCACAATGTGTGCTCATCATTTT
FOS	hTFtarget	NW_012015244.1:18944122-18946122	1583	1594	-	14.0263	9.51e-06	0.0379	GGGGGGTGGAAC
FOXA1	hTFtarget	NW_012015244.1:18944122-18946122	1590	1598	-	13.7105	9.56e-06	0.0321	GCCTGGGGG
EP300	hTFtarget	NW_012015244.1:18944122-18946122	1590	1598	+	13.6316	9.56e-06	0.038	CCCCCAGGC
FOXM1	hTFtarget	NW_012015244.1:18944122-18946122	466	477	-	13.974	9.58e-06	0.0351	TGTGCAAACAGA
EWSR1	hTFtarget	NW_012015244.1:18944122-18946122	680	695	-	0.285714	9.58e-06	0.0186	AGGGAAGGAAGTCAGT
REPIN1	hTFtarget	NW_012015244.1:18944122-18946122	83	94	+	14.2879	9.58e-06	0.038	TTCCAGCTGGTG
SPI1	hTFtarget	NW_012015244.1:18944122-18946122	1577	1597	+	13.75	9.6e-06	0.038	CTGCTTGTTCCACCCCCCAGG
SUMO2	hTFtarget	NW_012015244.1:18944122-18946122	935	950	+	13.8714	9.61e-06	0.0376	AGCACACATTGTGCTT
EP300	hTFtarget	NW_012015244.1:18944122-18946122	1853	1868	-	11.9429	9.63e-06	0.0382	CACCTGCTGCCACAGC
AR	hTFtarget	NW_012015244.1:18944122-18946122	934	949	+	13.6212	9.68e-06	0.0187	GAGCACACATTGTGCT
MYC	hTFtarget	NW_012015244.1:18944122-18946122	564	579	+	13.6282	9.69e-06	0.0186	ACTTCTTCATCCCCTG
CREBBP	hTFtarget	NW_012015244.1:18944122-18946122	150	165	+	4.84286	9.75e-06	0.0382	GACAGGTAGGGAGACA
AR	hTFtarget	NW_012015244.1:18944122-18946122	936	950	+	13.7879	9.75e-06	0.0314	GCACACATTGTGCTT
CBX1	hTFtarget	NW_012015244.1:18944122-18946122	912	923	+	13.6974	9.78e-06	0.0382	ATGAAATGGAAA
AR	hTFtarget	NW_012015244.1:18944122-18946122	934	949	-	13.9697	9.79e-06	0.019	AGCACAATGTGTGCTC
AR	hTFtarget	NW_012015244.1:18944122-18946122	936	951	+	13.2727	9.81e-06	0.0382	GCACACATTGTGCTTG
EP300	hTFtarget	NW_012015244.1:18944122-18946122	224	234	-	13.5132	9.82e-06	0.0367	AAATTCCAGTC
ZFX	database	NW_012015244.1:18944122-18946122	1586	1604	+	13.8182	9.87e-06	0.0391	CCACCCCCCAGGCCTGAAT
FOXA1	hTFtarget	NW_012015244.1:18944122-18946122	935	949	+	13.8485	9.87e-06	0.038	AGCACACATTGTGCT
TP53	hTFtarget	NW_012015244.1:18944122-18946122	1105	1120	+	13.4545	9.89e-06	0.0188	CTGGCTCCTTTGTCTG
ASCL1	hTFtarget	NW_012015244.1:18944122-18946122	1860	1868	+	14.197	9.9e-06	0.0392	CAGCAGGTG
SP2	hTFtarget	NW_012015244.1:18944122-18946122	745	766	-	13.5128	9.9e-06	0.0261	GAATTTTTTTTTTTTTTTTTGG
TP53	hTFtarget	NW_012015244.1:18944122-18946122	470	485	-	13.4211	9.91e-06	0.0379	CTTCCTCATGTGCAAA
TBX5	database	NW_012015244.1:18944122-18946122	174	183	-	13.0306	9.92e-06	0.0395	TCAGGTGTTG
SPI1	hTFtarget	NW_012015244.1:18944122-18946122	1951	1968	-	12.6818	9.92e-06	0.0186	CTTAGACTTCCTTTTATT
FOXA1	hTFtarget	NW_012015244.1:18944122-18946122	1286	1301	-	13.9403	9.93e-06	0.0372	CTCCTGTTTATATAAG
EP300	hTFtarget	NW_012015244.1:18944122-18946122	301	316	-	7.46053	9.94e-06	0.0384	ATTACATCCTTTATTT
FOXA1	hTFtarget	NW_012015244.1:18944122-18946122	1590	1598	+	13.9868	9.96e-06	0.0394	CCCCCAGGC
IRF5	hTFtarget	NW_012015244.1:18944122-18946122	754	769	+	8.74026	9.97e-06	0.00387	AAAAAAAAAATTCCTT
ESR1	hTFtarget	NW_012015244.1:18944122-18946122	397	407	-	12.9851	9.98e-06	0.0192	AGAGAGGGAGG
EWSR1	hTFtarget	NW_012015244.1:18944122-18946122	679	697	-	3.07576	1e-05	0.0384	GAAGGGAAGGAAGTCAGTT
AR	hTFtarget	NW_012015244.1:18944122-18946122	467	478	+	13.2917	1e-05	0.0381	CTGTTTGCACAT
IRF4	database	NW_012015244.1:18944122-18946122	746	761	+	13.8644	1.01e-05	0.0125	CAAAAAAAAAAAAAAA
ZBTB6	database	NW_012015244.1:18944122-18946122	1076	1088	+	13.8539	1.01e-05	0.04	AAAAGATGGAGCC
CTCF	hTFtarget	NW_012015244.1:18944122-18946122	1939	1947	-	13.9868	1.01e-05	0.0387	AGAACTGCA
CTCF	hTFtarget	NW_012015244.1:18944122-18946122	1939	1947	-	14.1184	1.01e-05	0.0387	AGAACTGCA
ZFX	database	NW_012015244.1:18944122-18946122	1586	1604	+	13.7857	1.01e-05	0.0401	CCACCCCCCAGGCCTGAAT
NR2E3	database	NW_012015244.1:18944122-18946122	1246	1259	-	12.3333	1.02e-05	0.0379	GACATCAAATGTTA
AR	hTFtarget	NW_012015244.1:18944122-18946122	936	951	+	13.9211	1.02e-05	0.0381	GCACACATTGTGCTTG
AR	hTFtarget	NW_012015244.1:18944122-18946122	934	949	+	13.7576	1.02e-05	0.0197	GAGCACACATTGTGCT
JUND	hTFtarget	NW_012015244.1:18944122-18946122	317	328	+	14.0263	1.02e-05	0.0381	AAAAACTGAAAA
RNF2	hTFtarget	NW_012015244.1:18944122-18946122	417	432	-	12	1.02e-05	0.0397	ACAGTCACAGGCAGAG
SIX5	hTFtarget	NW_012015244.1:18944122-18946122	1931	1942	+	13.6184	1.02e-05	0.0405	GGTTTCCTTGCA
AR	hTFtarget	NW_012015244.1:18944122-18946122	935	950	-	13.5	1.02e-05	0.0246	AAGCACAATGTGTGCT
AR	hTFtarget	NW_012015244.1:18944122-18946122	935	950	-	13.0758	1.02e-05	0.0215	AAGCACAATGTGTGCT
IRF4	database	NW_012015244.1:18944122-18946122	746	761	+	13.8119	1.02e-05	0.0127	CAAAAAAAAAAAAAAA
ZBTB6	database	NW_012015244.1:18944122-18946122	1076	1088	+	13.8061	1.02e-05	0.0404	AAAAGATGGAGCC
AR	hTFtarget	NW_012015244.1:18944122-18946122	935	950	-	13.4091	1.03e-05	0.0202	AAGCACAATGTGTGCT
MYC	hTFtarget	NW_012015244.1:18944122-18946122	409	430	-	9.43421	1.03e-05	0.0135	AGTCACAGGCAGAGGGTAAGAA
RUNX1T1	hTFtarget	NW_012015244.1:18944122-18946122	1970	1981	-	13.7286	1.03e-05	0.0399	GAGTCAGGAAGC
TP53	hTFtarget	NW_012015244.1:18944122-18946122	704	719	-	13.1471	1.03e-05	0.0398	GAAAGAGTCAAAGAGA
SMAD2	database	NW_012015244.1:18944122-18946122	1640	1650	-	13.3265	1.04e-05	0.0414	GTGCCTGGCTG
ZNF219	database	NW_012015244.1:18944122-18946122	1587	1598	+	12.878	1.04e-05	0.0415	CACCCCCCAGGC
GTF2I	hTFtarget	NW_012015244.1:18944122-18946122	108	116	-	14.1143	1.04e-05	0.0206	CTGCCTCCC
PAX5	hTFtarget	NW_012015244.1:18944122-18946122	138	153	-	13.381	1.04e-05	0.0372	TGTCACTTCTGCTTCT
BRD4	hTFtarget	NW_012015244.1:18944122-18946122	1455	1473	+	10.6184	1.04e-05	0.0399	TAGTTTAAAGCTATCATCA
SMARCA4	hTFtarget	NW_012015244.1:18944122-18946122	1921	1929	-	13.2105	1.04e-05	0.041	CCTGCAGAG
TEAD4	hTFtarget	NW_012015244.1:18944122-18946122	223	234	+	13.5455	1.04e-05	0.0388	TGACTGGAATTT
EOMES	hTFtarget	NW_012015244.1:18944122-18946122	1066	1074	-	13.1	1.04e-05	0.0411	CCAGCTGTG
EOMES	hTFtarget	NW_012015244.1:18944122-18946122	1921	1929	+	13.1579	1.04e-05	0.0411	CTCTGCAGG
SMAD2	database	NW_012015244.1:18944122-18946122	1640	1650	-	13.3265	1.04e-05	0.0413	GTGCCTGGCTG
EBF1	database	NW_012015244.1:18944122-18946122	1911	1924	+	13.6742	1.05e-05	0.0413	GCCCTGGGGACTCT
SP1	hTFtarget	NW_012015244.1:18944122-18946122	1583	1594	+	13.8684	1.05e-05	0.0417	GTTCCACCCCCC
SPI1	hTFtarget	NW_012015244.1:18944122-18946122	1950	1965	+	11.7121	1.05e-05	0.0358	AAATAAAAGGAAGTCT
AR	hTFtarget	NW_012015244.1:18944122-18946122	934	949	+	13.4394	1.05e-05	0.0204	GAGCACACATTGTGCT
TCF21	database	NW_012015244.1:18944122-18946122	1399	1412	-	12.449	1.05e-05	0.0279	GCAAAAGCTGTTGT
MAX	hTFtarget	NW_012015244.1:18944122-18946122	139	154	+	13.6883	1.06e-05	0.0398	GAAGCAGAAGTGACAG
PBX3	hTFtarget	NW_012015244.1:18944122-18946122	1412	1422	+	13.4848	1.06e-05	0.0422	CGATTGGCAGC
YY1	hTFtarget	NW_012015244.1:18944122-18946122	1077	1088	-	14.0132	1.06e-05	0.0421	GGCTCCATCTTT
CTCF	hTFtarget	NW_012015244.1:18944122-18946122	1939	1947	-	13.6184	1.06e-05	0.0407	AGAACTGCA
CTCF	hTFtarget	NW_012015244.1:18944122-18946122	1939	1947	-	13.7895	1.06e-05	0.0415	AGAACTGCA
EP300	hTFtarget	NW_012015244.1:18944122-18946122	685	693	-	12.5143	1.06e-05	0.0423	GGAAGGAAG
ESR1	hTFtarget	NW_012015244.1:18944122-18946122	692	716	-	12.9403	1.07e-05	0.0202	AGAGTCAAAGAGATTCAGGGAAGGG
STAT2	hTFtarget	NW_012015244.1:18944122-18946122	690	701	+	13.8158	1.07e-05	0.0424	TTCCCTTCCCTG
ZBTB17	hTFtarget	NW_012015244.1:18944122-18946122	526	541	-	11.7286	1.07e-05	0.0423	TCTTTAGCACTGCCTG
EP300	hTFtarget	NW_012015244.1:18944122-18946122	484	499	-	13.8684	1.07e-05	0.0423	CTAGCACTTCCAGTCT
AR	hTFtarget	NW_012015244.1:18944122-18946122	934	949	+	13.6364	1.07e-05	0.0211	GAGCACACATTGTGCT
AR	hTFtarget	NW_012015244.1:18944122-18946122	935	950	+	13.4848	1.08e-05	0.0209	AGCACACATTGTGCTT
RELA	hTFtarget	NW_012015244.1:18944122-18946122	317	327	+	13.8553	1.08e-05	0.0401	AAAAACTGAAA
SMAD4	hTFtarget	NW_012015244.1:18944122-18946122	1247	1262	-	13.2987	1.08e-05	0.0429	AATGACATCAAATGTT
SUMO2	hTFtarget	NW_012015244.1:18944122-18946122	298	319	+	12.6429	1.08e-05	0.0422	GAAAAATAAAGGATGTAATAAA
TP53	hTFtarget	NW_012015244.1:18944122-18946122	474	485	+	13.8421	1.08e-05	0.0413	CACATGAGGAAG
TFAP2C	database	NW_012015244.1:18944122-18946122	1586	1600	+	13.9796	1.09e-05	0.0428	CCACCCCCCAGGCCT
HIF1A	hTFtarget	NW_012015244.1:18944122-18946122	150	167	-	7.10526	1.09e-05	0.0209	TTTGTCTCCCTACCTGTC
PBX1	hTFtarget	NW_012015244.1:18944122-18946122	1409	1420	-	13.1818	1.09e-05	0.0431	TGCCAATCGCAA
SMAD4	hTFtarget	NW_012015244.1:18944122-18946122	1101	1109	+	13.1857	1.09e-05	0.0432	CAGTCTGGC
AR	hTFtarget	NW_012015244.1:18944122-18946122	935	950	-	13.5	1.09e-05	0.0307	AAGCACAATGTGTGCT
FOXA1	hTFtarget	NW_012015244.1:18944122-18946122	468	479	-	12.6389	1.1e-05	0.041	CATGTGCAAACA
AR	hTFtarget	NW_012015244.1:18944122-18946122	453	477	+	13.169	1.1e-05	0.0398	CCAAAGGTTTCTTTCTGTTTGCACA
SPI1	hTFtarget	NW_012015244.1:18944122-18946122	1950	1965	+	10.7424	1.1e-05	0.0281	AAATAAAAGGAAGTCT
PGR	hTFtarget	NW_012015244.1:18944122-18946122	1572	1587	-	12.9242	1.11e-05	0.0417	GGAACAAGCAGGGCCT
BTAF1	hTFtarget	NW_012015244.1:18944122-18946122	1571	1595	+	4.46053	1.11e-05	0.0438	GAGGCCCTGCTTGTTCCACCCCCCA
SPI1	hTFtarget	NW_012015244.1:18944122-18946122	138	153	+	13.3636	1.11e-05	0.0423	AGAAGCAGAAGTGACA
SPI1	hTFtarget	NW_012015244.1:18944122-18946122	138	153	+	12.8286	1.11e-05	0.043	AGAAGCAGAAGTGACA
SOX11	database	NW_012015244.1:18944122-18946122	1207	1221	+	3.30612	1.11e-05	0.0412	CACAGTTACATTGTT
AR	hTFtarget	NW_012015244.1:18944122-18946122	936	951	-	13.3939	1.12e-05	0.044	CAAGCACAATGTGTGC
SPI1	hTFtarget	NW_012015244.1:18944122-18946122	137	153	-	12.8333	1.13e-05	0.0438	TGTCACTTCTGCTTCTC
CBX3	hTFtarget	NW_012015244.1:18944122-18946122	898	922	+	6.13158	1.13e-05	0.0444	GGGAAAAAAACCCCATGAAATGGAA
EP300	hTFtarget	NW_012015244.1:18944122-18946122	549	564	+	6.80263	1.13e-05	0.0443	AAGATAGATATCCCAA
EP300	hTFtarget	NW_012015244.1:18944122-18946122	467	478	-	13.375	1.13e-05	0.0422	ATGTGCAAACAG
HOMEZ	database	NW_012015244.1:18944122-18946122	1238	1249	-	13.4848	1.13e-05	0.0393	GTTATTCGTTTT
SMAD1	database	NW_012015244.1:18944122-18946122	1447	1458	-	13.6465	1.13e-05	0.0442	ACTATGTCTGCC
SPIB	hTFtarget	NW_012015244.1:18944122-18946122	138	153	+	13.1212	1.14e-05	0.0437	AGAAGCAGAAGTGACA
SMAD1	database	NW_012015244.1:18944122-18946122	1447	1458	-	13.6126	1.15e-05	0.045	ACTATGTCTGCC
PCGF2	hTFtarget	NW_012015244.1:18944122-18946122	397	418	+	13.4605	1.15e-05	0.023	CCTCCCTCTCTCTTCTTACCCT
TAF1	hTFtarget	NW_012015244.1:18944122-18946122	1843	1863	-	12.8553	1.15e-05	0.0454	GCTGCCACAGCTTCAATAGCT
NKX6-1	database	NW_012015244.1:18944122-18946122	336	352	-	13.1214	1.16e-05	0.0414	AGTTATTAATTATTCCC
HDAC2	hTFtarget	NW_012015244.1:18944122-18946122	1057	1078	+	13.1786	1.16e-05	0.0449	CACAGTTTACACAGCTGGTAAA
NR2C2	hTFtarget	NW_012015244.1:18944122-18946122	1577	1601	+	13.2078	1.16e-05	0.0457	CTGCTTGTTCCACCCCCCAGGCCTG
REST	hTFtarget	NW_012015244.1:18944122-18946122	233	244	-	13.6447	1.16e-05	0.0455	CAAGTGATGAAA
SPI1	hTFtarget	NW_012015244.1:18944122-18946122	1953	1964	+	13.5714	1.16e-05	0.0453	TAAAAGGAAGTC
SPI1	hTFtarget	NW_012015244.1:18944122-18946122	606	621	+	13.4211	1.16e-05	0.046	ACACCATCACCCAGAG
ZNF384	hTFtarget	NW_012015244.1:18944122-18946122	1574	1598	+	13.1807	1.16e-05	0.0456	GCCCTGCTTGTTCCACCCCCCAGGC
ASCL2	hTFtarget	NW_012015244.1:18944122-18946122	878	893	+	13.8158	1.17e-05	0.0463	TCTTGTAAATCAAGTT
SP2	hTFtarget	NW_012015244.1:18944122-18946122	838	853	-	13.4583	1.17e-05	0.00627	TTTTAATGTATTTGTT
TCF12	hTFtarget	NW_012015244.1:18944122-18946122	85	94	-	14.0152	1.17e-05	0.0232	CACCAGCTGG
TRIM28	hTFtarget	NW_012015244.1:18944122-18946122	302	315	+	9.59211	1.17e-05	0.0448	AATAAAGGATGTAA
ZNF384	hTFtarget	NW_012015244.1:18944122-18946122	1734	1755	+	8.83333	1.17e-05	0.00429	TAACTTGGACTTTTTTTCTTCT
AR	database	NW_012015244.1:18944122-18946122	1396	1410	-	13.2477	1.18e-05	0.0443	AAAAGCTGTTGTTCA
NFIC	hTFtarget	NW_012015244.1:18944122-18946122	316	327	-	13.9211	1.18e-05	0.0443	TTTCAGTTTTTA
NR3C1	hTFtarget	NW_012015244.1:18944122-18946122	934	949	-	13.5	1.18e-05	0.0297	AGCACAATGTGTGCTC
PCGF2	hTFtarget	NW_012015244.1:18944122-18946122	386	407	+	13.4342	1.18e-05	0.023	CCTCTCAGCAGCCTCCCTCTCT
SPI1	hTFtarget	NW_012015244.1:18944122-18946122	1579	1594	-	13.5429	1.18e-05	0.047	GGGGGGTGGAACAAGC
CENPA	hTFtarget	NW_012015244.1:18944122-18946122	346	361	+	10.8816	1.18e-05	0.0444	AATAACTTCTCATAGC
AR	hTFtarget	NW_012015244.1:18944122-18946122	935	950	+	13.5606	1.18e-05	0.0226	AGCACACATTGTGCTT
AR	hTFtarget	NW_012015244.1:18944122-18946122	933	951	+	13.4848	1.19e-05	0.0233	TGAGCACACATTGTGCTTG
FLI1	hTFtarget	NW_012015244.1:18944122-18946122	681	696	+	-11.6061	1.19e-05	0.0459	CTGACTTCCTTCCCTT
GTF2I	hTFtarget	NW_012015244.1:18944122-18946122	1838	1858	-	12.3158	1.19e-05	0.0466	CACAGCTTCAATAGCTGAAGC
MXI1	hTFtarget	NW_012015244.1:18944122-18946122	1507	1522	+	13.4737	1.19e-05	0.0473	GTGGCCTGGGCACTAA
POLR2A	hTFtarget	NW_012015244.1:18944122-18946122	1850	1865	-	12.7714	1.19e-05	0.0471	CTGCTGCCACAGCTTC
EP300	hTFtarget	NW_012015244.1:18944122-18946122	302	317	-	8.78947	1.19e-05	0.0451	TATTACATCCTTTATT
AR	hTFtarget	NW_012015244.1:18944122-18946122	934	949	+	12.9242	1.19e-05	0.0215	GAGCACACATTGTGCT
NR3C1	database	NW_012015244.1:18944122-18946122	933	951	+	12.4607	1.2e-05	0.0466	TGAGCACACATTGTGCTTG
AR	hTFtarget	NW_012015244.1:18944122-18946122	934	949	-	13.5921	1.2e-05	0.0445	AGCACAATGTGTGCTC
FLI1	hTFtarget	NW_012015244.1:18944122-18946122	680	701	+	-3.42857	1.2e-05	0.0384	ACTGACTTCCTTCCCTTCCCTG
AR	hTFtarget	NW_012015244.1:18944122-18946122	934	949	-	13.4394	1.2e-05	0.0259	AGCACAATGTGTGCTC
AR	hTFtarget	NW_012015244.1:18944122-18946122	934	949	-	13.3636	1.2e-05	0.0232	AGCACAATGTGTGCTC
IRF4	hTFtarget	NW_012015244.1:18944122-18946122	139	150	-	13.5526	1.2e-05	0.0467	CACTTCTGCTTC
MED1	hTFtarget	NW_012015244.1:18944122-18946122	1952	1963	+	13.5526	1.2e-05	0.0467	ATAAAAGGAAGT
STAT1	hTFtarget	NW_012015244.1:18944122-18946122	138	153	-	13.3944	1.2e-05	0.0459	TGTCACTTCTGCTTCT
CDK7	hTFtarget	NW_012015244.1:18944122-18946122	1285	1293	+	12.8718	1.2e-05	0.0435	CCTTATATA
AR	hTFtarget	NW_012015244.1:18944122-18946122	935	950	+	13.1515	1.2e-05	0.0344	AGCACACATTGTGCTT
ZFY	database	NW_012015244.1:18944122-18946122	1588	1601	+	13.9286	1.2e-05	0.0477	ACCCCCCAGGCCTG
SMAD4	database	NW_012015244.1:18944122-18946122	1446	1454	-	13.1463	1.21e-05	0.0478	TGTCTGCCC
AR	hTFtarget	NW_012015244.1:18944122-18946122	933	951	-	13.4697	1.21e-05	0.0233	CAAGCACAATGTGTGCTCA
GTF2I	hTFtarget	NW_012015244.1:18944122-18946122	689	710	+	12.3684	1.21e-05	0.0471	CTTCCCTTCCCTGAATCTCTTT
KDM5B	hTFtarget	NW_012015244.1:18944122-18946122	398	413	+	13.6806	1.21e-05	0.0315	CTCCCTCTCTCTTCTT
LMO2	hTFtarget	NW_012015244.1:18944122-18946122	685	693	+	13.3816	1.21e-05	0.0477	CTTCCTTCC
MYB	hTFtarget	NW_012015244.1:18944122-18946122	174	182	-	13.1	1.21e-05	0.0476	CAGGTGTTG
POLR3A	hTFtarget	NW_012015244.1:18944122-18946122	317	332	+	13.4103	1.21e-05	0.00703	AAAAACTGAAAAAAAA
SOX17	hTFtarget	NW_012015244.1:18944122-18946122	1079	1093	-	13.7143	1.21e-05	0.0478	GTCTGGGCTCCATCT
TAL1	hTFtarget	NW_012015244.1:18944122-18946122	1067	1075	+	13.4079	1.21e-05	0.0478	ACAGCTGGT
TCF12	hTFtarget	NW_012015244.1:18944122-18946122	1065	1076	-	13.7632	1.21e-05	0.031	TACCAGCTGTGT
SMAD4	database	NW_012015244.1:18944122-18946122	1446	1454	-	13.1122	1.21e-05	0.0478	TGTCTGCCC
AR	database	NW_012015244.1:18944122-18946122	934	948	+	13.8462	1.22e-05	0.0238	GAGCACACATTGTGC
HNF4:COUP	database	NW_012015244.1:18944122-18946122	1738	1746	-	11.7692	1.22e-05	0.0488	AAAGTCCAA
JUND	hTFtarget	NW_012015244.1:18944122-18946122	1253	1261	-	14.6316	1.22e-05	0.0473	ATGACATCA
TAF1	hTFtarget	NW_012015244.1:18944122-18946122	1078	1089	+	13.1974	1.22e-05	0.0486	AAGATGGAGCCC
TOP1	hTFtarget	NW_012015244.1:18944122-18946122	1123	1131	-	13.1429	1.22e-05	0.0474	AACAAACAG
HOXC5	database	NW_012015244.1:18944122-18946122	336	352	+	12.8333	1.23e-05	0.0449	GGGAATAATTAATAACT
HOXA9	hTFtarget	NW_012015244.1:18944122-18946122	1166	1177	+	13.3939	1.23e-05	0.0462	GTGATTTATTAG
BCL6	hTFtarget	NW_012015244.1:18944122-18946122	1951	1962	-	13.4429	1.23e-05	0.0483	CTTCCTTTTATT
GTF2I	hTFtarget	NW_012015244.1:18944122-18946122	391	406	-	13.3289	1.24e-05	0.0484	GAGAGGGAGGCTGCTG
MED1	hTFtarget	NW_012015244.1:18944122-18946122	746	761	-	13.5065	1.24e-05	0.0116	TTTTTTTTTTTTTTTG
TFAP2C	hTFtarget	NW_012015244.1:18944122-18946122	83	94	+	13.5526	1.24e-05	0.0492	TTCCAGCTGGTG
CTCF	hTFtarget	NW_012015244.1:18944122-18946122	1937	1948	+	13.6316	1.24e-05	0.0491	CTTGCAGTTCTT
TRIM63	database	NW_012015244.1:18944122-18946122	318	328	+	13.6222	1.25e-05	0.0467	AAAACTGAAAA
RUNX1	hTFtarget	NW_012015244.1:18944122-18946122	1909	1920	+	13.8421	1.25e-05	0.0496	AGGCCCTGGGGA
SPI1	hTFtarget	NW_012015244.1:18944122-18946122	606	621	+	13.2987	1.25e-05	0.0497	ACACCATCACCCAGAG
SPI1	hTFtarget	NW_012015244.1:18944122-18946122	1579	1594	-	13.4079	1.25e-05	0.0496	GGGGGGTGGAACAAGC
FOXA2	hTFtarget	NW_012015244.1:18944122-18946122	1066	1074	+	13.7368	1.26e-05	0.0499	CACAGCTGG
OTX2	hTFtarget	NW_012015244.1:18944122-18946122	1066	1074	+	13.5658	1.26e-05	0.0501	CACAGCTGG
PGR	hTFtarget	NW_012015244.1:18944122-18946122	1572	1587	-	12.5417	1.26e-05	0.0486	GGAACAAGCAGGGCCT
CREB1	hTFtarget	NW_012015244.1:18944122-18946122	934	949	-	13.3571	1.26e-05	0.0487	AGCACAATGTGTGCTC
BACH1	database	NW_012015244.1:18944122-18946122	632	645	+	10.789	1.27e-05	0.0502	AGCTGAGTCCCAGT
FLI1	hTFtarget	NW_012015244.1:18944122-18946122	680	693	+	-3.92105	1.27e-05	0.0249	ACTGACTTCCTTCC
FOXA1	hTFtarget	NW_012015244.1:18944122-18946122	935	949	+	13.5286	1.27e-05	0.0318	AGCACACATTGTGCT
FOXA1	hTFtarget	NW_012015244.1:18944122-18946122	1286	1301	-	13.8485	1.27e-05	0.0456	CTCCTGTTTATATAAG
AR	hTFtarget	NW_012015244.1:18944122-18946122	935	950	+	13.3571	1.27e-05	0.0293	AGCACACATTGTGCTT
SPI1	hTFtarget	NW_012015244.1:18944122-18946122	1578	1593	+	12.8421	1.27e-05	0.0503	TGCTTGTTCCACCCCC
AR	hTFtarget	NW_012015244.1:18944122-18946122	936	955	+	13.2273	1.27e-05	0.0498	GCACACATTGTGCTTGCTAT
AR	hTFtarget	NW_012015244.1:18944122-18946122	934	949	+	13.3636	1.27e-05	0.0246	GAGCACACATTGTGCT
NKX6-1	database	NW_012015244.1:18944122-18946122	842	854	-	13.6436	1.27e-05	0.0437	TTTTTAATGTATT
AR	hTFtarget	NW_012015244.1:18944122-18946122	934	949	+	13.3182	1.28e-05	0.0245	GAGCACACATTGTGCT
IRF4	hTFtarget	NW_012015244.1:18944122-18946122	141	157	+	13.1714	1.28e-05	0.0486	AGCAGAAGTGACAGGTA
SP1	hTFtarget	NW_012015244.1:18944122-18946122	1583	1594	-	13.6	1.29e-05	0.0515	GGGGGGTGGAAC
AR	hTFtarget	NW_012015244.1:18944122-18946122	934	949	+	13.2273	1.29e-05	0.0246	GAGCACACATTGTGCT
BACH1	database	NW_012015244.1:18944122-18946122	632	645	-	9.54082	1.29e-05	0.0512	ACTGGGACTCAGCT
RELA	hTFtarget	NW_012015244.1:18944122-18946122	913	921	-	14.1842	1.3e-05	0.0507	TCCATTTCA
TCF7L2	hTFtarget	NW_012015244.1:18944122-18946122	1955	1963	+	12.9143	1.3e-05	0.0512	AAAGGAAGT
CREBBP	hTFtarget	NW_012015244.1:18944122-18946122	226	234	-	14.1579	1.3e-05	0.049	AAATTCCAG
STAT4	database	NW_012015244.1:18944122-18946122	730	743	+	14	1.31e-05	0.0506	TTCCTAGAATCACC
AR	hTFtarget	NW_012015244.1:18944122-18946122	458	473	-	13.3662	1.31e-05	0.0498	CAAACAGAAAGAAACC
AR	hTFtarget	NW_012015244.1:18944122-18946122	409	424	-	13.3205	1.31e-05	0.0251	AGGCAGAGGGTAAGAA
NANOG	hTFtarget	NW_012015244.1:18944122-18946122	1921	1929	+	13.6053	1.31e-05	0.0521	CTCTGCAGG
STAT2	hTFtarget	NW_012015244.1:18944122-18946122	1583	1594	-	13.5	1.31e-05	0.0519	GGGGGGTGGAAC
TCF12	hTFtarget	NW_012015244.1:18944122-18946122	138	153	+	13.2895	1.31e-05	0.0484	AGAAGCAGAAGTGACA
IRF4	database	NW_012015244.1:18944122-18946122	312	327	+	13.4915	1.32e-05	0.0125	GTAATAAAAACTGAAA
MED1	hTFtarget	NW_012015244.1:18944122-18946122	139	154	+	13.3896	1.32e-05	0.0168	GAAGCAGAAGTGACAG
NR3C1	hTFtarget	NW_012015244.1:18944122-18946122	934	949	+	13.2576	1.32e-05	0.0356	GAGCACACATTGTGCT
AR	hTFtarget	NW_012015244.1:18944122-18946122	934	949	+	12.9697	1.32e-05	0.0506	GAGCACACATTGTGCT
CREB1	hTFtarget	NW_012015244.1:18944122-18946122	399	410	-	13.1667	1.32e-05	0.0257	AAGAGAGAGGGA
ETS1	hTFtarget	NW_012015244.1:18944122-18946122	693	708	+	13.3377	1.33e-05	0.0523	CCTTCCCTGAATCTCT
PRDM1	hTFtarget	NW_012015244.1:18944122-18946122	1307	1331	-	11.7738	1.33e-05	0.051	TTTTTTAAAAATGTGTTTATCTCAT
SUZ12	hTFtarget	NW_012015244.1:18944122-18946122	1850	1865	-	12.5395	1.33e-05	0.0528	CTGCTGCCACAGCTTC
CREBBP	hTFtarget	NW_012015244.1:18944122-18946122	1289	1297	+	14.026	1.33e-05	0.0447	ATATAAACA
RFX2	database	NW_012015244.1:18944122-18946122	777	795	-	12.7586	1.34e-05	0.0533	GTTACCTCAGAAACAGAGC
MAX	hTFtarget	NW_012015244.1:18944122-18946122	506	521	+	13.5132	1.34e-05	0.053	AATGCCCTGGGAGCAG
MED1	hTFtarget	NW_012015244.1:18944122-18946122	747	762	-	13.3117	1.34e-05	0.0168	TTTTTTTTTTTTTTTT
MED1	hTFtarget	NW_012015244.1:18944122-18946122	748	763	-	13.3117	1.34e-05	0.0168	TTTTTTTTTTTTTTTT
FOXC1	database	NW_012015244.1:18944122-18946122	1286	1300	-	13.4045	1.35e-05	0.037	TCCTGTTTATATAAG
NR3C1	hTFtarget	NW_012015244.1:18944122-18946122	935	949	-	13.3333	1.35e-05	0.0337	AGCACAATGTGTGCT
STAT1	hTFtarget	NW_012015244.1:18944122-18946122	1501	1512	-	12.1316	1.35e-05	0.0536	GGCCACACAGGG
IRF4	database	NW_012015244.1:18944122-18946122	312	327	+	13.4257	1.35e-05	0.0127	GTAATAAAAACTGAAA
RELA	hTFtarget	NW_012015244.1:18944122-18946122	402	413	+	13.2987	1.36e-05	0.0513	CTCTCTCTTCTT
SPI1	hTFtarget	NW_012015244.1:18944122-18946122	1951	1964	-	13.1061	1.36e-05	0.019	GACTTCCTTTTATT
FOXC1	database	NW_012015244.1:18944122-18946122	1286	1300	+	13.3673	1.36e-05	0.037	CTTATATAAACAGGA
AR	hTFtarget	NW_012015244.1:18944122-18946122	935	950	+	13.2727	1.37e-05	0.0259	AGCACACATTGTGCTT
SPI1	hTFtarget	NW_012015244.1:18944122-18946122	138	153	-	12.5152	1.37e-05	0.0535	TGTCACTTCTGCTTCT
SPI1	hTFtarget	NW_012015244.1:18944122-18946122	137	150	-	13.0909	1.37e-05	0.019	CACTTCTGCTTCTC
GTF3C2	hTFtarget	NW_012015244.1:18944122-18946122	1083	1104	-	8.05714	1.38e-05	0.0547	ACTGAGTTTGAGTCTGGGCTCC
PGR	hTFtarget	NW_012015244.1:18944122-18946122	935	950	+	13.2273	1.38e-05	0.0271	AGCACACATTGTGCTT
SOX10	hTFtarget	NW_012015244.1:18944122-18946122	754	775	-	13.2121	1.38e-05	0.0506	TGAGACAAGGAATTTTTTTTTT
SPI1	hTFtarget	NW_012015244.1:18944122-18946122	137	151	+	12.7576	1.38e-05	0.035	GAGAAGCAGAAGTGA
NANOGP1	database	NW_012015244.1:18944122-18946122	66	74	+	7.1448	1.38e-05	0.0528	TTAATGGCT
IRF4	hTFtarget	NW_012015244.1:18944122-18946122	139	154	-	13.1842	1.39e-05	0.0526	CTGTCACTTCTGCTTC
IRF5	hTFtarget	NW_012015244.1:18944122-18946122	745	760	+	7.63636	1.39e-05	0.00444	CCAAAAAAAAAAAAAA
STAT1	hTFtarget	NW_012015244.1:18944122-18946122	399	420	-	11.2987	1.39e-05	0.0543	AGAGGGTAAGAAGAGAGAGGGA
FOS	hTFtarget	NW_012015244.1:18944122-18946122	1583	1594	+	13.3684	1.4e-05	0.0556	GTTCCACCCCCC
IRF5	hTFtarget	NW_012015244.1:18944122-18946122	744	759	+	7.62338	1.4e-05	0.00444	ACCAAAAAAAAAAAAA
USF2	hTFtarget	NW_012015244.1:18944122-18946122	688	699	+	13.2169	1.4e-05	0.0409	CCTTCCCTTCCC
AR	hTFtarget	NW_012015244.1:18944122-18946122	934	949	-	13.1364	1.4e-05	0.0267	AGCACAATGTGTGCTC
EP300	hTFtarget	NW_012015244.1:18944122-18946122	1286	1297	+	13.5844	1.4e-05	0.0503	CTTATATAAACA
FERD3L	database	NW_012015244.1:18944122-18946122	1920	1940	+	12.8367	1.4e-05	0.0552	ACTCTGCAGGTGGTTTCCTTG
PTF1A	database	NW_012015244.1:18944122-18946122	1920	1940	-	12.8257	1.41e-05	0.0557	CAAGGAAACCACCTGCAGAGT
IRF1	hTFtarget	NW_012015244.1:18944122-18946122	747	762	+	13.4935	1.41e-05	0.0261	AAAAAAAAAAAAAAAA
IRF1	hTFtarget	NW_012015244.1:18944122-18946122	748	763	+	13.4935	1.41e-05	0.0261	AAAAAAAAAAAAAAAA
PRDM1	hTFtarget	NW_012015244.1:18944122-18946122	399	413	-	13.3485	1.41e-05	0.054	AAGAAGAGAGAGGGA
SMAD1	hTFtarget	NW_012015244.1:18944122-18946122	911	922	+	13.5	1.41e-05	0.0539	CATGAAATGGAA
ZNF143	hTFtarget	NW_012015244.1:18944122-18946122	890	901	+	13.3421	1.41e-05	0.0272	AGTTACAAGGGA
AR	hTFtarget	NW_012015244.1:18944122-18946122	935	949	-	13.3182	1.41e-05	0.0383	AGCACAATGTGTGCT
AR	hTFtarget	NW_012015244.1:18944122-18946122	934	949	+	13.1212	1.41e-05	0.0272	GAGCACACATTGTGCT
TCF21	database	NW_012015244.1:18944122-18946122	1399	1412	+	11.7245	1.41e-05	0.0279	ACAACAGCTTTTGC
AR	hTFtarget	NW_012015244.1:18944122-18946122	935	950	-	13.1061	1.42e-05	0.0283	AAGCACAATGTGTGCT
ZEB1	hTFtarget	NW_012015244.1:18944122-18946122	1862	1870	+	13.2576	1.42e-05	0.0561	GCAGGTGTG
MTA3	hTFtarget	NW_012015244.1:18944122-18946122	139	154	-	13.4026	1.43e-05	0.0269	CTGTCACTTCTGCTTC
SPIB	hTFtarget	NW_012015244.1:18944122-18946122	137	152	-	12.1364	1.43e-05	0.0533	GTCACTTCTGCTTCTC
STAT1	hTFtarget	NW_012015244.1:18944122-18946122	228	243	-	11.1688	1.43e-05	0.0531	AAGTGATGAAAATTCC
STAT1	hTFtarget	NW_012015244.1:18944122-18946122	228	243	-	11.1688	1.43e-05	0.0531	AAGTGATGAAAATTCC
AR	hTFtarget	NW_012015244.1:18944122-18946122	453	474	-	12.8057	1.43e-05	0.0548	GCAAACAGAAAGAAACCTTTGG
SOX2	hTFtarget	NW_012015244.1:18944122-18946122	719	727	+	13.2763	1.44e-05	0.0575	CCTGCTGGT
SPI1	hTFtarget	NW_012015244.1:18944122-18946122	136	151	+	10	1.44e-05	0.0281	AGAGAAGCAGAAGTGA
BRD4	hTFtarget	NW_012015244.1:18944122-18946122	147	167	-	13.038	1.45e-05	0.0562	TTTGTCTCCCTACCTGTCACT
SPI1	hTFtarget	NW_012015244.1:18944122-18946122	850	865	+	11.6667	1.45e-05	0.0189	AAAAATGAAGAAATGT
SPI1	hTFtarget	NW_012015244.1:18944122-18946122	1583	1598	+	13.2632	1.45e-05	0.0575	GTTCCACCCCCCAGGC
SPI1	hTFtarget	NW_012015244.1:18944122-18946122	1577	1594	+	12.7895	1.45e-05	0.0576	CTGCTTGTTCCACCCCCC
AR	hTFtarget	NW_012015244.1:18944122-18946122	934	949	-	13.1364	1.45e-05	0.0425	AGCACAATGTGTGCTC
ERMAP	hTFtarget	NW_012015244.1:18944122-18946122	683	694	-	13.4143	1.46e-05	0.0576	GGGAAGGAAGTC
NR3C1	hTFtarget	NW_012015244.1:18944122-18946122	934	949	-	13.197	1.46e-05	0.0313	AGCACAATGTGTGCTC
CREB1	hTFtarget	NW_012015244.1:18944122-18946122	392	416	+	12.6824	1.46e-05	0.0209	AGCAGCCTCCCTCTCTCTTCTTACC
EP300	hTFtarget	NW_012015244.1:18944122-18946122	1289	1297	+	13.6753	1.46e-05	0.0547	ATATAAACA
TBX5	database	NW_012015244.1:18944122-18946122	1864	1871	+	13.6517	1.47e-05	0.0585	AGGTGTGA
SPI1	hTFtarget	NW_012015244.1:18944122-18946122	136	151	+	11.6364	1.47e-05	0.0189	AGAGAAGCAGAAGTGA
AR	hTFtarget	NW_012015244.1:18944122-18946122	935	949	+	13.0909	1.47e-05	0.0285	AGCACACATTGTGCT
AR	hTFtarget	NW_012015244.1:18944122-18946122	936	956	-	13.0303	1.47e-05	0.0287	TATAGCAAGCACAATGTGTGC
FOXP4	database	NW_012015244.1:18944122-18946122	745	759	+	13.4752	1.47e-05	0.00689	CCAAAAAAAAAAAAA
TBX15	database	NW_012015244.1:18944122-18946122	1864	1871	+	15.3776	1.47e-05	0.0585	AGGTGTGA
TBX5	database	NW_012015244.1:18944122-18946122	1864	1871	+	13.6429	1.47e-05	0.0585	AGGTGTGA
FOXA1	hTFtarget	NW_012015244.1:18944122-18946122	468	478	+	12.6806	1.48e-05	0.0554	TGTTTGCACAT
ASCL1	hTFtarget	NW_012015244.1:18944122-18946122	1860	1868	+	13.7576	1.48e-05	0.0588	CAGCAGGTG
KLF5	hTFtarget	NW_012015244.1:18944122-18946122	1583	1594	-	13.25	1.48e-05	0.0588	GGGGGGTGGAAC
PRDM1	hTFtarget	NW_012015244.1:18944122-18946122	684	699	+	13.1818	1.48e-05	0.0586	ACTTCCTTCCCTTCCC
SRF	hTFtarget	NW_012015244.1:18944122-18946122	399	410	-	13.4474	1.48e-05	0.0281	AAGAGAGAGGGA
TCF12	hTFtarget	NW_012015244.1:18944122-18946122	1590	1598	-	13.6974	1.48e-05	0.0588	GCCTGGGGG
EWSR1	hTFtarget	NW_012015244.1:18944122-18946122	681	692	+	12.0714	1.49e-05	0.0293	CTGACTTCCTTC
NFYA	hTFtarget	NW_012015244.1:18944122-18946122	1583	1594	-	13.3026	1.49e-05	0.0592	GGGGGGTGGAAC
SOX2	hTFtarget	NW_012015244.1:18944122-18946122	719	727	-	13.4605	1.49e-05	0.0595	ACCAGCAGG
SPI1	hTFtarget	NW_012015244.1:18944122-18946122	851	864	-	12.9394	1.49e-05	0.019	CATTTCTTCATTTT
FOXP4	database	NW_012015244.1:18944122-18946122	744	758	+	13.4653	1.49e-05	0.00689	ACCAAAAAAAAAAAA
MESP1	database	NW_012015244.1:18944122-18946122	1861	1870	+	12.9388	1.49e-05	0.0591	AGCAGGTGTG
FLI1	hTFtarget	NW_012015244.1:18944122-18946122	684	699	-	12.6759	1.5e-05	0.029	GGGAAGGGAAGGAAGT
MEIS1	hTFtarget	NW_012015244.1:18944122-18946122	483	494	-	13.5	1.5e-05	0.0577	ACTTCCAGTCTT
PRAME	hTFtarget	NW_012015244.1:18944122-18946122	1583	1594	-	13.4605	1.5e-05	0.0599	GGGGGGTGGAAC
RARA	hTFtarget	NW_012015244.1:18944122-18946122	468	477	+	13.6234	1.5e-05	0.0555	TGTTTGCACA
SPI1	hTFtarget	NW_012015244.1:18944122-18946122	1583	1594	-	13.5	1.5e-05	0.0599	GGGGGGTGGAAC
DMRT2	database	NW_012015244.1:18944122-18946122	841	850	-	12.5149	1.5e-05	0.0515	TAATGTATTT
FOXD1	database	NW_012015244.1:18944122-18946122	1432	1446	-	13.12	1.51e-05	0.0579	CTCTGTTTTCCTAAG
ZNF263	database	NW_012015244.1:18944122-18946122	397	417	-	12.4286	1.51e-05	0.0436	GGGTAAGAAGAGAGAGGGAGG
AR	hTFtarget	NW_012015244.1:18944122-18946122	934	949	+	13.0303	1.52e-05	0.0283	GAGCACACATTGTGCT
AR	hTFtarget	NW_012015244.1:18944122-18946122	934	949	-	13.1143	1.52e-05	0.0293	AGCACAATGTGTGCTC
POLR3A	hTFtarget	NW_012015244.1:18944122-18946122	753	768	+	13.141	1.52e-05	0.0076	AAAAAAAAAAATTCCT
CDX2	hTFtarget	NW_012015244.1:18944122-18946122	309	320	-	13.0746	1.52e-05	0.0584	TTTTATTACATC
NR3C1	hTFtarget	NW_012015244.1:18944122-18946122	935	950	+	13.0758	1.53e-05	0.0297	AGCACACATTGTGCTT
LMO2	hTFtarget	NW_012015244.1:18944122-18946122	685	693	+	13.3421	1.54e-05	0.0602	CTTCCTTCC
NR3C1	hTFtarget	NW_012015244.1:18944122-18946122	935	949	+	13.1212	1.54e-05	0.0349	AGCACACATTGTGCT
ZFHX3	database	NW_012015244.1:18944122-18946122	343	353	+	13.6875	1.55e-05	0.0266	ATTAATAACTT
HEY1	hTFtarget	NW_012015244.1:18944122-18946122	912	923	+	13.0658	1.55e-05	0.058	ATGAAATGGAAA
NR3C1	hTFtarget	NW_012015244.1:18944122-18946122	935	950	+	13.1061	1.55e-05	0.0586	AGCACACATTGTGCTT
YY1	hTFtarget	NW_012015244.1:18944122-18946122	1077	1088	+	13.3026	1.55e-05	0.0609	AAAGATGGAGCC
ZFHX3	database	NW_012015244.1:18944122-18946122	343	353	+	13.7723	1.55e-05	0.0273	ATTAATAACTT
FLI1	hTFtarget	NW_012015244.1:18944122-18946122	401	425	-	6.09091	1.56e-05	0.035	CAGGCAGAGGGTAAGAAGAGAGAGG
ASCL1	hTFtarget	NW_012015244.1:18944122-18946122	1859	1872	-	13.6818	1.57e-05	0.0622	ATCACACCTGCTGC
SPI1	hTFtarget	NW_012015244.1:18944122-18946122	1577	1598	-	12.7286	1.57e-05	0.0622	GCCTGGGGGGTGGAACAAGCAG
SPI1	hTFtarget	NW_012015244.1:18944122-18946122	1579	1594	+	13.1429	1.58e-05	0.0627	GCTTGTTCCACCCCCC
TCF12	hTFtarget	NW_012015244.1:18944122-18946122	1920	1931	-	13.4342	1.58e-05	0.031	CACCTGCAGAGT
CTCF	hTFtarget	NW_012015244.1:18944122-18946122	1938	1949	+	13.2368	1.58e-05	0.0586	TTGCAGTTCTTC
NR3C1	hTFtarget	NW_012015244.1:18944122-18946122	935	950	+	13.0758	1.59e-05	0.0313	AGCACACATTGTGCTT
SIN3A	hTFtarget	NW_012015244.1:18944122-18946122	1590	1598	+	13.3026	1.59e-05	0.0629	CCCCCAGGC
TP53	hTFtarget	NW_012015244.1:18944122-18946122	1105	1120	-	12.1974	1.59e-05	0.0305	CAGACAAAGGAGCCAG
HIF1A	hTFtarget	NW_012015244.1:18944122-18946122	684	699	+	13.039	1.6e-05	0.0308	ACTTCCTTCCCTTCCC
IRF3	hTFtarget	NW_012015244.1:18944122-18946122	1654	1678	+	11.2821	1.6e-05	0.0603	GAGATAGACGAAGAAGACTAAGATG
STAT1	hTFtarget	NW_012015244.1:18944122-18946122	397	408	+	13.3816	1.6e-05	0.0617	CCTCCCTCTCTC
TAF1	hTFtarget	NW_012015244.1:18944122-18946122	1853	1868	-	11.3816	1.6e-05	0.0384	CACCTGCTGCCACAGC
AR	hTFtarget	NW_012015244.1:18944122-18946122	934	948	-	13.0303	1.6e-05	0.0314	GCACAATGTGTGCTC
HNF1A	database	NW_012015244.1:18944122-18946122	338	352	-	13.013	1.61e-05	0.0557	AGTTATTAATTATTC
AR	hTFtarget	NW_012015244.1:18944122-18946122	935	950	+	13.2763	1.61e-05	0.0308	AGCACACATTGTGCTT
ASCL1	hTFtarget	NW_012015244.1:18944122-18946122	1860	1871	-	13.7273	1.61e-05	0.0634	TCACACCTGCTG
LIN9	hTFtarget	NW_012015244.1:18944122-18946122	1410	1421	+	13.4342	1.61e-05	0.0637	TGCGATTGGCAG
NANOG	hTFtarget	NW_012015244.1:18944122-18946122	199	209	+	12.5972	1.61e-05	0.061	ATCCTTTCTTT
BHLHE40	hTFtarget	NW_012015244.1:18944122-18946122	466	477	+	12.2338	1.61e-05	0.0576	TCTGTTTGCACA
SIN3A	hTFtarget	NW_012015244.1:18944122-18946122	1066	1074	+	13.7632	1.61e-05	0.0318	CACAGCTGG
CTCF	hTFtarget	NW_012015244.1:18944122-18946122	1939	1947	-	13.2368	1.61e-05	0.0634	AGAACTGCA
AR	hTFtarget	NW_012015244.1:18944122-18946122	934	949	+	13.0152	1.62e-05	0.0307	GAGCACACATTGTGCT
AR	hTFtarget	NW_012015244.1:18944122-18946122	467	478	-	12.7639	1.62e-05	0.063	ATGTGCAAACAG
TAL1	database	NW_012015244.1:18944122-18946122	1763	1774	-	12.5955	1.63e-05	0.0556	TACCAGATGTTT
GLIS3	database	NW_012015244.1:18944122-18946122	1587	1596	-	13.3146	1.63e-05	0.065	CTGGGGGGTG
FOXA1	hTFtarget	NW_012015244.1:18944122-18946122	1912	1920	+	13.3947	1.63e-05	0.0321	CCCTGGGGA
SPI1	hTFtarget	NW_012015244.1:18944122-18946122	1590	1598	+	14.5132	1.63e-05	0.0646	CCCCCAGGC
TFAP2C	hTFtarget	NW_012015244.1:18944122-18946122	1590	1601	-	13.4848	1.63e-05	0.0458	CAGGCCTGGGGG
HNF1A	database	NW_012015244.1:18944122-18946122	338	352	+	12.97	1.63e-05	0.0564	GAATAATTAATAACT
FOXA1	hTFtarget	NW_012015244.1:18944122-18946122	114	129	-	13.4848	1.64e-05	0.0629	GACAATGTCAATACTG
RXRA	hTFtarget	NW_012015244.1:18944122-18946122	916	927	+	13.1169	1.64e-05	0.0627	AATGGAAATAAA
SPI1	hTFtarget	NW_012015244.1:18944122-18946122	1583	1594	-	13.4286	1.64e-05	0.0654	GGGGGGTGGAAC
EP300	hTFtarget	NW_012015244.1:18944122-18946122	233	246	-	9.8	1.64e-05	0.0337	AACAAGTGATGAAA
ATOH8	database	NW_012015244.1:18944122-18946122	1925	1933	-	13.3776	1.64e-05	0.0653	ACCACCTGC
BCL11A	database	NW_012015244.1:18944122-18946122	140	154	+	13.051	1.64e-05	0.0619	AAGCAGAAGTGACAG
POU4F1	database	NW_012015244.1:18944122-18946122	846	859	-	12.937	1.64e-05	0.048	CTTCATTTTTAATG
CTCF	hTFtarget	NW_012015244.1:18944122-18946122	1938	1953	-	13.1711	1.65e-05	0.0643	ATTTGAAGAACTGCAA
FLI1	hTFtarget	NW_012015244.1:18944122-18946122	397	412	+	12.8816	1.66e-05	0.0494	CCTCCCTCTCTCTTCT
FOS	hTFtarget	NW_012015244.1:18944122-18946122	1583	1594	-	13.0526	1.66e-05	0.0658	GGGGGGTGGAAC
CDX2	hTFtarget	NW_012015244.1:18944122-18946122	309	320	-	13.0299	1.66e-05	0.0622	TTTTATTACATC
FOXA1	hTFtarget	NW_012015244.1:18944122-18946122	114	129	-	13.3881	1.67e-05	0.0632	GACAATGTCAATACTG
GTF2I	hTFtarget	NW_012015244.1:18944122-18946122	1850	1865	-	12.8714	1.67e-05	0.0328	CTGCTGCCACAGCTTC
OTX2	hTFtarget	NW_012015244.1:18944122-18946122	1066	1074	+	13.4474	1.67e-05	0.0562	CACAGCTGG
OTX2	hTFtarget	NW_012015244.1:18944122-18946122	1921	1929	+	13.3553	1.67e-05	0.0663	CTCTGCAGG
CREB1	hTFtarget	NW_012015244.1:18944122-18946122	394	418	+	12.4797	1.67e-05	0.0209	CAGCCTCCCTCTCTCTTCTTACCCT
EHF	hTFtarget	NW_012015244.1:18944122-18946122	914	935	+	12.9589	1.67e-05	0.0202	GAAATGGAAATAAAAATGATGA
SOX14	database	NW_012015244.1:18944122-18946122	287	299	+	11.8673	1.67e-05	0.0654	ACACTAACACTGA
HDAC2	hTFtarget	NW_012015244.1:18944122-18946122	1921	1932	-	13.3553	1.68e-05	0.0238	CCACCTGCAGAG
SPI1	hTFtarget	NW_012015244.1:18944122-18946122	1583	1594	+	13.1711	1.68e-05	0.0669	GTTCCACCCCCC
FOXM1	hTFtarget	NW_012015244.1:18944122-18946122	49	57	+	12.7403	1.69e-05	0.0602	GTTTCAAAT
JUND	hTFtarget	NW_012015244.1:18944122-18946122	319	327	+	13.6711	1.69e-05	0.065	AAACTGAAA
NOTCH1	hTFtarget	NW_012015244.1:18944122-18946122	1410	1421	-	13.4474	1.69e-05	0.0671	CTGCCAATCGCA
RUNX3	hTFtarget	NW_012015244.1:18944122-18946122	317	328	+	13.4211	1.69e-05	0.0636	AAAAACTGAAAA
AR	hTFtarget	NW_012015244.1:18944122-18946122	467	478	+	12.974	1.69e-05	0.063	CTGTTTGCACAT
SPI1	hTFtarget	NW_012015244.1:18944122-18946122	1953	1964	+	13.0606	1.69e-05	0.0651	TAAAAGGAAGTC
FOXP4	database	NW_012015244.1:18944122-18946122	743	757	+	13.3564	1.69e-05	0.00689	CACCAAAAAAAAAAA
ESR1	hTFtarget	NW_012015244.1:18944122-18946122	696	717	-	11.9254	1.7e-05	0.0415	AAGAGTCAAAGAGATTCAGGGA
KLF4	hTFtarget	NW_012015244.1:18944122-18946122	484	499	+	13.1447	1.7e-05	0.0663	AGACTGGAAGTGCTAG
NR3C1	hTFtarget	NW_012015244.1:18944122-18946122	935	949	+	12.8939	1.7e-05	0.0654	AGCACACATTGTGCT
SMAD2/SMAD3	hTFtarget	NW_012015244.1:18944122-18946122	719	727	-	13.2368	1.7e-05	0.0376	ACCAGCAGG
TP53	hTFtarget	NW_012015244.1:18944122-18946122	224	232	-	13.2105	1.7e-05	0.0674	ATTCCAGTC
ZBTB17	hTFtarget	NW_012015244.1:18944122-18946122	1592	1610	-	12.7857	1.7e-05	0.0475	TTGACCATTCAGGCCTGGG
ZNF143	hTFtarget	NW_012015244.1:18944122-18946122	314	329	-	12.8462	1.7e-05	0.0307	TTTTTCAGTTTTTATT
EHF	hTFtarget	NW_012015244.1:18944122-18946122	397	418	-	12.9315	1.7e-05	0.0202	AGGGTAAGAAGAGAGAGGGAGG
STAT1	database	NW_012015244.1:18944122-18946122	729	739	-	13.3091	1.71e-05	0.0651	ATTCTAGGAAG
EP300	hTFtarget	NW_012015244.1:18944122-18946122	301	316	-	8.72368	1.71e-05	0.0663	ATTACATCCTTTATTT
PDX1	database	NW_012015244.1:18944122-18946122	1365	1379	+	12.7822	1.72e-05	0.0644	TTTGCCATTAATGTC
IRF3	hTFtarget	NW_012015244.1:18944122-18946122	1583	1594	-	13.2237	1.72e-05	0.0684	GGGGGGTGGAAC
NR3C1	hTFtarget	NW_012015244.1:18944122-18946122	935	949	+	12.9848	1.72e-05	0.0337	AGCACACATTGTGCT
SPI1	hTFtarget	NW_012015244.1:18944122-18946122	1579	1594	+	12.8947	1.72e-05	0.0685	GCTTGTTCCACCCCCC
AR	hTFtarget	NW_012015244.1:18944122-18946122	934	949	-	12.8939	1.72e-05	0.0333	AGCACAATGTGTGCTC
IRF1	database	NW_012015244.1:18944122-18946122	313	333	-	12.0968	1.73e-05	0.0645	ATTTTTTTTCAGTTTTTATTA
STAT1	database	NW_012015244.1:18944122-18946122	685	706	-	13	1.73e-05	0.0526	AGATTCAGGGAAGGGAAGGAAG
IRF5	hTFtarget	NW_012015244.1:18944122-18946122	137	155	-	8.89474	1.73e-05	0.034	CCTGTCACTTCTGCTTCTC
SPI1	hTFtarget	NW_012015244.1:18944122-18946122	685	700	+	13.1053	1.73e-05	0.0477	CTTCCTTCCCTTCCCT
SPI1	hTFtarget	NW_012015244.1:18944122-18946122	1950	1965	+	11.2879	1.73e-05	0.032	AAATAAAAGGAAGTCT
SUPT20H	hTFtarget	NW_012015244.1:18944122-18946122	484	495	-	13.1447	1.73e-05	0.0678	CACTTCCAGTCT
SP2	database	NW_012015244.1:18944122-18946122	579	587	+	13.1633	1.74e-05	0.0692	GGGCAGGAC
FOXA1	hTFtarget	NW_012015244.1:18944122-18946122	935	949	-	13.0571	1.74e-05	0.0318	AGCACAATGTGTGCT
FOXA1	hTFtarget	NW_012015244.1:18944122-18946122	468	479	-	12.3731	1.74e-05	0.069	CATGTGCAAACA
FOXA1	hTFtarget	NW_012015244.1:18944122-18946122	468	478	-	12.75	1.74e-05	0.0649	ATGTGCAAACA
GATA3	hTFtarget	NW_012015244.1:18944122-18946122	468	479	-	12.9861	1.74e-05	0.0641	CATGTGCAAACA
MYOD1	hTFtarget	NW_012015244.1:18944122-18946122	146	154	-	13.3816	1.74e-05	0.0681	CTGTCACTT
CDK9	hTFtarget	NW_012015244.1:18944122-18946122	5	20	-	13.0641	1.74e-05	0.0594	AGCTACATATTTATAT
IRF3	hTFtarget	NW_012015244.1:18944122-18946122	311	332	+	12.1127	1.75e-05	0.0547	TGTAATAAAAACTGAAAAAAAA
AR	hTFtarget	NW_012015244.1:18944122-18946122	934	949	-	12.8636	1.75e-05	0.0338	AGCACAATGTGTGCTC
SETDB1	hTFtarget	NW_012015244.1:18944122-18946122	1869	1890	-	10.2632	1.75e-05	0.0676	CTTCGCTCTTCTGAAGTAATCA
SPI1	hTFtarget	NW_012015244.1:18944122-18946122	1572	1596	+	11.4857	1.75e-05	0.0692	AGGCCCTGCTTGTTCCACCCCCCAG
SUMO2/SUMO3	hTFtarget	NW_012015244.1:18944122-18946122	835	845	+	12.5694	1.75e-05	0.0655	CTGAACAAATA
TCF21	hTFtarget	NW_012015244.1:18944122-18946122	84	92	-	14.1711	1.75e-05	0.0617	CCAGCTGGA
ZBTB3	database	NW_012015244.1:18944122-18946122	1675	1683	+	10.73	1.75e-05	0.0409	GATGCAGTG
RNF2	hTFtarget	NW_012015244.1:18944122-18946122	562	577	-	13.1429	1.76e-05	0.0505	GGGGATGAAGAAGTTG
SMAD1	hTFtarget	NW_012015244.1:18944122-18946122	717	727	-	13.3289	1.76e-05	0.0695	ACCAGCAGGAA
AR	hTFtarget	NW_012015244.1:18944122-18946122	458	474	-	12.7746	1.76e-05	0.0655	GCAAACAGAAAGAAACC
EP300	hTFtarget	NW_012015244.1:18944122-18946122	1439	1454	+	12.4857	1.76e-05	0.0694	AAACAGAGGGCAGACA
EP300	hTFtarget	NW_012015244.1:18944122-18946122	466	477	-	12.4805	1.76e-05	0.0671	TGTGCAAACAGA
NFYA	hTFtarget	NW_012015244.1:18944122-18946122	1583	1594	-	13.2632	1.77e-05	0.0704	GGGGGGTGGAAC
PRDM1	hTFtarget	NW_012015244.1:18944122-18946122	338	362	+	12.4578	1.77e-05	0.0656	GAATAATTAATAACTTCTCATAGCA
SP2	hTFtarget	NW_012015244.1:18944122-18946122	146	167	+	12.7237	1.77e-05	0.0702	AAGTGACAGGTAGGGAGACAAA
YY1	hTFtarget	NW_012015244.1:18944122-18946122	1078	1088	-	13.1842	1.77e-05	0.0696	GGCTCCATCTT
ZNF711	hTFtarget	NW_012015244.1:18944122-18946122	1592	1600	-	13.8947	1.77e-05	0.0705	AGGCCTGGG
EP300	hTFtarget	NW_012015244.1:18944122-18946122	302	315	+	9.61429	1.77e-05	0.0337	AATAAAGGATGTAA
OTX2	hTFtarget	NW_012015244.1:18944122-18946122	719	727	-	13.1579	1.78e-05	0.0407	ACCAGCAGG
SPI1	hTFtarget	NW_012015244.1:18944122-18946122	1579	1594	-	12.8553	1.78e-05	0.0708	GGGGGGTGGAACAAGC
AR	hTFtarget	NW_012015244.1:18944122-18946122	934	949	-	12.6818	1.78e-05	0.0344	AGCACAATGTGTGCTC
POU6F1	database	NW_012015244.1:18944122-18946122	338	348	+	13.0297	1.79e-05	0.0627	GAATAATTAAT
AR	hTFtarget	NW_012015244.1:18944122-18946122	171	187	-	12.6056	1.79e-05	0.033	GTACTCAGGTGTTGACA
FOXA1	hTFtarget	NW_012015244.1:18944122-18946122	465	479	+	12.8209	1.79e-05	0.0665	TTCTGTTTGCACATG
MED1	hTFtarget	NW_012015244.1:18944122-18946122	747	762	+	12.961	1.79e-05	0.0168	AAAAAAAAAAAAAAAA
MED1	hTFtarget	NW_012015244.1:18944122-18946122	748	763	+	12.961	1.79e-05	0.0168	AAAAAAAAAAAAAAAA
NANOG	hTFtarget	NW_012015244.1:18944122-18946122	1111	1119	-	13.0857	1.79e-05	0.068	AGACAAAGG
PAX6	hTFtarget	NW_012015244.1:18944122-18946122	1111	1119	-	13.2237	1.79e-05	0.0683	AGACAAAGG
SPI1	hTFtarget	NW_012015244.1:18944122-18946122	1938	1949	-	12.697	1.79e-05	0.0482	GAAGAACTGCAA
YY1	database	NW_012015244.1:18944122-18946122	1077	1088	+	13	1.8e-05	0.0703	AAAGATGGAGCC
AR	hTFtarget	NW_012015244.1:18944122-18946122	934	949	-	12.8333	1.8e-05	0.0343	AGCACAATGTGTGCTC
ZNF263	hTFtarget	NW_012015244.1:18944122-18946122	514	525	-	13.6061	1.8e-05	0.0714	AGCGCTGCTCCC
AR	hTFtarget	NW_012015244.1:18944122-18946122	935	948	-	12.8143	1.8e-05	0.0601	GCACAATGTGTGCT
EP300	hTFtarget	NW_012015244.1:18944122-18946122	302	316	-	5.15789	1.8e-05	0.0697	ATTACATCCTTTATT
CDX2	database	NW_012015244.1:18944122-18946122	310	320	+	13.6271	1.81e-05	0.0678	ATGTAATAAAA
FOS	hTFtarget	NW_012015244.1:18944122-18946122	1583	1594	-	13.0921	1.81e-05	0.0719	GGGGGGTGGAAC
SP2	hTFtarget	NW_012015244.1:18944122-18946122	1411	1419	+	13	1.81e-05	0.0721	GCGATTGGC
SPI1	hTFtarget	NW_012015244.1:18944122-18946122	1583	1598	-	12.1053	1.81e-05	0.0719	GCCTGGGGGGTGGAAC
SPI1	hTFtarget	NW_012015244.1:18944122-18946122	1951	1965	+	12.2121	1.81e-05	0.035	AATAAAAGGAAGTCT
SUMO2/SUMO3	hTFtarget	NW_012015244.1:18944122-18946122	515	530	-	12.5526	1.81e-05	0.0719	GCCTGAGCGCTGCTCC
ASCL1	hTFtarget	NW_012015244.1:18944122-18946122	1861	1869	+	13.6364	1.82e-05	0.072	AGCAGGTGT
STAT1	hTFtarget	NW_012015244.1:18944122-18946122	876	887	-	13.4026	1.82e-05	0.0681	ATTTACAAGAAG
YY1	database	NW_012015244.1:18944122-18946122	1077	1088	+	12.9592	1.82e-05	0.0722	AAAGATGGAGCC
NHLH1	database	NW_012015244.1:18944122-18946122	1855	1876	+	10.6579	1.83e-05	0.0722	TGTGGCAGCAGGTGTGATTACT
POLR2A	hTFtarget	NW_012015244.1:18944122-18946122	1850	1865	+	12.4474	1.83e-05	0.0725	GAAGCTGTGGCAGCAG
SP2	hTFtarget	NW_012015244.1:18944122-18946122	287	308	-	12.7564	1.83e-05	0.0261	CTTTATTTTTCAGTGTTAGTGT
SPI1	hTFtarget	NW_012015244.1:18944122-18946122	1578	1593	+	12.7857	1.83e-05	0.0727	TGCTTGTTCCACCCCC
NR3C1	hTFtarget	NW_012015244.1:18944122-18946122	935	950	-	12.8485	1.84e-05	0.0498	AAGCACAATGTGTGCT
SPI1	hTFtarget	NW_012015244.1:18944122-18946122	1579	1594	+	12.8684	1.84e-05	0.073	GCTTGTTCCACCCCCC
TP53	hTFtarget	NW_012015244.1:18944122-18946122	398	416	-	5.98592	1.84e-05	0.0721	GGTAAGAAGAGAGAGGGAG
ERMAP	hTFtarget	NW_012015244.1:18944122-18946122	683	694	-	12.9857	1.85e-05	0.0728	GGGAAGGAAGTC
AR	hTFtarget	NW_012015244.1:18944122-18946122	466	477	+	12.8961	1.85e-05	0.0711	TCTGTTTGCACA
FOXA1	hTFtarget	NW_012015244.1:18944122-18946122	1286	1300	+	13.2537	1.85e-05	0.0696	CTTATATAAACAGGA
IRF3	hTFtarget	NW_012015244.1:18944122-18946122	398	413	-	12.9221	1.85e-05	0.0386	AAGAAGAGAGAGGGAG
PRDM1	hTFtarget	NW_012015244.1:18944122-18946122	400	416	+	12.3857	1.85e-05	0.0713	CCCTCTCTCTTCTTACC
FLI1	hTFtarget	NW_012015244.1:18944122-18946122	671	695	-	5.60606	1.86e-05	0.035	AGGGAAGGAAGTCAGTTCAGGGTGG
FOXA1	hTFtarget	NW_012015244.1:18944122-18946122	1286	1301	-	13.2836	1.86e-05	0.0663	CTCCTGTTTATATAAG
NR3C1	hTFtarget	NW_012015244.1:18944122-18946122	935	950	-	12.697	1.86e-05	0.0356	AAGCACAATGTGTGCT
NR3C1	hTFtarget	NW_012015244.1:18944122-18946122	935	949	-	12.803	1.86e-05	0.0349	AGCACAATGTGTGCT
SRF	hTFtarget	NW_012015244.1:18944122-18946122	1577	1601	+	12.3976	1.86e-05	0.0592	CTGCTTGTTCCACCCCCCAGGCCTG
TCF12	hTFtarget	NW_012015244.1:18944122-18946122	1862	1870	-	13.4697	1.86e-05	0.0739	CACACCTGC
CDK9	hTFtarget	NW_012015244.1:18944122-18946122	388	403	-	12.9079	1.86e-05	0.0738	AGGGAGGCTGCTGAGA
HIC1	database	NW_012015244.1:18944122-18946122	509	526	-	12.8421	1.87e-05	0.074	GAGCGCTGCTCCCAGGGC
NKX2-1	hTFtarget	NW_012015244.1:18944122-18946122	1632	1643	+	12.5	1.87e-05	0.0743	AAAGCACTCAGC
SPI1	hTFtarget	NW_012015244.1:18944122-18946122	1583	1594	+	12.9571	1.87e-05	0.0744	GTTCCACCCCCC
AR	hTFtarget	NW_012015244.1:18944122-18946122	468	478	+	12.6806	1.87e-05	0.0725	TGTTTGCACAT
ZNF148	database	NW_012015244.1:18944122-18946122	1584	1598	-	12.573	1.88e-05	0.0746	GCCTGGGGGGTGGAA
TCF3	database	NW_012015244.1:18944122-18946122	1922	1934	-	12.8539	1.88e-05	0.0745	AACCACCTGCAGA
NFYA	hTFtarget	NW_012015244.1:18944122-18946122	1583	1594	-	12.8714	1.88e-05	0.0747	GGGGGGTGGAAC
SPI1	hTFtarget	NW_012015244.1:18944122-18946122	1583	1594	-	13.0143	1.88e-05	0.075	GGGGGGTGGAAC
TCF3	hTFtarget	NW_012015244.1:18944122-18946122	1857	1868	+	12.8143	1.88e-05	0.0745	TGGCAGCAGGTG
RFX5	database	NW_012015244.1:18944122-18946122	781	796	+	10.0505	1.88e-05	0.0471	TGTTTCTGAGGTAACC
ZNF281	database	NW_012015244.1:18944122-18946122	1584	1598	-	12.5714	1.88e-05	0.0745	GCCTGGGGGGTGGAA
NANOG	hTFtarget	NW_012015244.1:18944122-18946122	1066	1074	+	12.3429	1.89e-05	0.0528	CACAGCTGG
RELA	hTFtarget	NW_012015244.1:18944122-18946122	1938	1949	+	13.013	1.89e-05	0.0728	TTGCAGTTCTTC
SP2	hTFtarget	NW_012015244.1:18944122-18946122	745	760	-	12.8889	1.89e-05	0.00887	TTTTTTTTTTTTTTGG
STAT1	hTFtarget	NW_012015244.1:18944122-18946122	969	980	-	13.0921	1.89e-05	0.0745	CAGCTCTTGGAA
TCF3	hTFtarget	NW_012015244.1:18944122-18946122	140	153	+	12.8421	1.89e-05	0.0445	AAGCAGAAGTGACA
CTCF	hTFtarget	NW_012015244.1:18944122-18946122	1937	1948	-	12.9737	1.89e-05	0.0753	AAGAACTGCAAG
HOXC6	database	NW_012015244.1:18944122-18946122	1166	1180	+	8.69725	1.9e-05	0.0692	GTGATTTATTAGTAA
GTF2I	hTFtarget	NW_012015244.1:18944122-18946122	470	485	+	12.4156	1.9e-05	0.0523	TTTGCACATGAGGAAG
BRCA1	hTFtarget	NW_012015244.1:18944122-18946122	1583	1594	+	12.6053	1.9e-05	0.0758	GTTCCACCCCCC
FOXP4	database	NW_012015244.1:18944122-18946122	746	760	+	13.2574	1.9e-05	0.00689	CAAAAAAAAAAAAAA
AR	hTFtarget	NW_012015244.1:18944122-18946122	467	478	+	12.8889	1.91e-05	0.0718	CTGTTTGCACAT
FLI1	hTFtarget	NW_012015244.1:18944122-18946122	683	694	+	13.2576	1.91e-05	0.0489	GACTTCCTTCCC
FOXA1	hTFtarget	NW_012015244.1:18944122-18946122	460	481	-	12.1493	1.91e-05	0.0732	CTCATGTGCAAACAGAAAGAAA
AP4	database	NW_012015244.1:18944122-18946122	1067	1075	-	12.4312	1.92e-05	0.0764	ACCAGCTGT
FLI1	hTFtarget	NW_012015244.1:18944122-18946122	1066	1074	+	13.6842	1.92e-05	0.0763	CACAGCTGG
SPI1	hTFtarget	NW_012015244.1:18944122-18946122	1574	1595	+	11.9857	1.92e-05	0.0761	GCCCTGCTTGTTCCACCCCCCA
SPI1	hTFtarget	NW_012015244.1:18944122-18946122	142	153	-	13.0921	1.92e-05	0.0734	TGTCACTTCTGC
TAF1	hTFtarget	NW_012015244.1:18944122-18946122	1850	1865	+	11.5526	1.92e-05	0.0761	GAAGCTGTGGCAGCAG
TAL1	hTFtarget	NW_012015244.1:18944122-18946122	85	93	-	12.5286	1.92e-05	0.0688	ACCAGCTGG
FOXP4	database	NW_012015244.1:18944122-18946122	747	761	+	13.2475	1.92e-05	0.00689	AAAAAAAAAAAAAAA
FOXP4	database	NW_012015244.1:18944122-18946122	748	762	+	13.2475	1.92e-05	0.00689	AAAAAAAAAAAAAAA
FOXP4	database	NW_012015244.1:18944122-18946122	749	763	+	13.2475	1.92e-05	0.00689	AAAAAAAAAAAAAAA
BCL6	hTFtarget	NW_012015244.1:18944122-18946122	1688	1698	-	12.8701	1.93e-05	0.0745	GTCCTAGAGAG
POLR2A	hTFtarget	NW_012015244.1:18944122-18946122	138	160	-	11.4737	1.93e-05	0.0762	CCCTACCTGTCACTTCTGCTTCT
ZNF92	hTFtarget	NW_012015244.1:18944122-18946122	1307	1331	-	11.4583	1.93e-05	0.0223	TTTTTTAAAAATGTGTTTATCTCAT
CTCF	hTFtarget	NW_012015244.1:18944122-18946122	1936	1947	+	12.9079	1.93e-05	0.0767	CCTTGCAGTTCT
MEF2A	hTFtarget	NW_012015244.1:18944122-18946122	316	327	+	13.1316	1.94e-05	0.0746	TAAAAACTGAAA
TAF1	hTFtarget	NW_012015244.1:18944122-18946122	1850	1865	-	10.9737	1.94e-05	0.0384	CTGCTGCCACAGCTTC
TRIM28	hTFtarget	NW_012015244.1:18944122-18946122	1097	1118	+	12.4048	1.94e-05	0.0735	AACTCAGTCTGGCTCCTTTGTC
TEF	database	NW_012015244.1:18944122-18946122	1284	1297	-	12.6436	1.95e-05	0.0716	TGTTTATATAAGGA
FLI1	hTFtarget	NW_012015244.1:18944122-18946122	402	426	+	-21.3714	1.95e-05	0.0681	CTCTCTCTTCTTACCCTCTGCCTGT
FOXA1	hTFtarget	NW_012015244.1:18944122-18946122	117	128	-	13.1549	1.95e-05	0.0735	ACAATGTCAATA
NFYB	hTFtarget	NW_012015244.1:18944122-18946122	1583	1594	-	12.7763	1.95e-05	0.0777	GGGGGGTGGAAC
SP2	hTFtarget	NW_012015244.1:18944122-18946122	1575	1598	+	11.4211	1.95e-05	0.0771	CCCTGCTTGTTCCACCCCCCAGGC
SPI1	hTFtarget	NW_012015244.1:18944122-18946122	1583	1594	+	12.8857	1.95e-05	0.0776	GTTCCACCCCCC
AR	hTFtarget	NW_012015244.1:18944122-18946122	935	949	+	12.8636	1.95e-05	0.0383	AGCACACATTGTGCT
NFATC1	database	NW_012015244.1:18944122-18946122	227	239	+	12.9697	1.96e-05	0.0752	TGGAATTTTCATC
HOXA9	hTFtarget	NW_012015244.1:18944122-18946122	1955	1963	-	13.4868	1.96e-05	0.0623	ACTTCCTTT
BCL11A	hTFtarget	NW_012015244.1:18944122-18946122	226	234	-	13.2237	1.96e-05	0.0757	AAATTCCAG
SPI1	hTFtarget	NW_012015244.1:18944122-18946122	1583	1594	-	13.0429	1.96e-05	0.0781	GGGGGGTGGAAC
ZBTB33	hTFtarget	NW_012015244.1:18944122-18946122	1578	1593	+	11.8421	1.96e-05	0.0778	TGCTTGTTCCACCCCC
TEF	database	NW_012015244.1:18944122-18946122	1284	1297	-	12.6436	1.96e-05	0.0714	TGTTTATATAAGGA
SPI1	hTFtarget	NW_012015244.1:18944122-18946122	1410	1421	+	13.1579	1.97e-05	0.0781	TGCGATTGGCAG
SPI1	hTFtarget	NW_012015244.1:18944122-18946122	1579	1594	+	12.2895	1.97e-05	0.0782	GCTTGTTCCACCCCCC
SPI1	hTFtarget	NW_012015244.1:18944122-18946122	1953	1964	+	13.0286	1.97e-05	0.077	TAAAAGGAAGTC
STAT1	hTFtarget	NW_012015244.1:18944122-18946122	457	472	-	10.0658	1.97e-05	0.0536	AAACAGAAAGAAACCT
ZNF274	hTFtarget	NW_012015244.1:18944122-18946122	1334	1349	+	12.7237	1.97e-05	0.0759	CCTTTAAATGGATGTC
AR	hTFtarget	NW_012015244.1:18944122-18946122	935	948	-	12.7121	1.97e-05	0.0412	GCACAATGTGTGCT
SNAI1	database	NW_012015244.1:18944122-18946122	1925	1932	+	13.5366	1.98e-05	0.0788	GCAGGTGG
AP4	database	NW_012015244.1:18944122-18946122	1857	1869	-	12.4184	1.98e-05	0.0782	ACACCTGCTGCCA
EZH2	hTFtarget	NW_012015244.1:18944122-18946122	896	911	-	12.4744	1.98e-05	0.0784	GGGGTTTTTTTCCCTT
MYC	hTFtarget	NW_012015244.1:18944122-18946122	1954	1962	+	12.6316	1.98e-05	0.0754	AAAAGGAAG
SIN3A	hTFtarget	NW_012015244.1:18944122-18946122	992	1002	-	12.3636	1.98e-05	0.0735	GGATTCAAATG
SPI1	hTFtarget	NW_012015244.1:18944122-18946122	1578	1593	-	12.4605	1.98e-05	0.0785	GGGGGTGGAACAAGCA
SRF	hTFtarget	NW_012015244.1:18944122-18946122	1167	1182	-	12.2632	1.98e-05	0.0739	CATTACTAATAAATCA
ZBTB17	hTFtarget	NW_012015244.1:18944122-18946122	362	383	-	2.65789	1.98e-05	0.0781	ATTGGCAAGGCAGGTAATATCT
SNAI1	database	NW_012015244.1:18944122-18946122	1925	1932	+	13.6224	1.98e-05	0.0784	GCAGGTGG
FOXA1	hTFtarget	NW_012015244.1:18944122-18946122	468	478	+	12.3611	1.99e-05	0.0778	TGTTTGCACAT
SPI1	hTFtarget	NW_012015244.1:18944122-18946122	1583	1594	+	12.8947	1.99e-05	0.079	GTTCCACCCCCC
TCF12	hTFtarget	NW_012015244.1:18944122-18946122	1923	1932	+	13.5303	1.99e-05	0.0262	CTGCAGGTGG
TP53	hTFtarget	NW_012015244.1:18944122-18946122	746	761	-	12.1299	1.99e-05	0.0252	TTTTTTTTTTTTTTTG
FLI1	hTFtarget	NW_012015244.1:18944122-18946122	397	408	-	11.5132	2e-05	0.0338	GAGAGAGGGAGG
GTF2B	hTFtarget	NW_012015244.1:18944122-18946122	1583	1594	+	12.75	2e-05	0.0795	GTTCCACCCCCC
MXI1	hTFtarget	NW_012015244.1:18944122-18946122	782	798	+	11.6316	2e-05	0.0794	GTTTCTGAGGTAACCCA
OTX2	hTFtarget	NW_012015244.1:18944122-18946122	1066	1074	+	13.0395	2e-05	0.0795	CACAGCTGG
FOXA1	database	NW_012015244.1:18944122-18946122	468	478	+	13.1522	2.01e-05	0.0745	TGTTTGCACAT
FOXC1	database	NW_012015244.1:18944122-18946122	1432	1446	-	12.5618	2.01e-05	0.037	CTCTGTTTTCCTAAG
FLI1	hTFtarget	NW_012015244.1:18944122-18946122	684	695	-	12.1324	2.01e-05	0.0774	AGGGAAGGAAGT
NR3C1	hTFtarget	NW_012015244.1:18944122-18946122	468	479	-	13.0909	2.01e-05	0.0735	CATGTGCAAACA
SPI1	hTFtarget	NW_012015244.1:18944122-18946122	1579	1594	-	11.9474	2.01e-05	0.0798	GGGGGGTGGAACAAGC
ZKSCAN1	hTFtarget	NW_012015244.1:18944122-18946122	948	963	+	12.4211	2.01e-05	0.0798	CTTGCTATATGCCAAG
FOXA1	database	NW_012015244.1:18944122-18946122	468	478	-	13.1089	2.01e-05	0.0745	ATGTGCAAACA
FOXC1	database	NW_012015244.1:18944122-18946122	1432	1446	+	12.5408	2.01e-05	0.037	CTTAGGAAAACAGAG
TCF12	database	NW_012015244.1:18944122-18946122	1924	1932	+	13.6066	2.02e-05	0.04	TGCAGGTGG
PKNOX2	database	NW_012015244.1:18944122-18946122	145	160	-	12.6667	2.02e-05	0.0803	CCCTACCTGTCACTTC
IRF4	hTFtarget	NW_012015244.1:18944122-18946122	139	150	+	12.8169	2.02e-05	0.0709	GAAGCAGAAGTG
TP53	hTFtarget	NW_012015244.1:18944122-18946122	1876	1897	+	11.2564	2.02e-05	0.0257	TTCAGAAGAGCGAAGGTGCAAA
TP53	hTFtarget	NW_012015244.1:18944122-18946122	399	414	-	12.4559	2.02e-05	0.0381	TAAGAAGAGAGAGGGA
TRIM28	hTFtarget	NW_012015244.1:18944122-18946122	1558	1571	-	10.5658	2.02e-05	0.0757	CTTAGCTAGGGCTG
YY1	hTFtarget	NW_012015244.1:18944122-18946122	1078	1089	+	12.4091	2.02e-05	0.0804	AAGATGGAGCCC
ZBTB17	hTFtarget	NW_012015244.1:18944122-18946122	526	541	+	10.8553	2.02e-05	0.0803	CAGGCAGTGCTAAAGA
TCF12	database	NW_012015244.1:18944122-18946122	1924	1932	+	13.551	2.02e-05	0.04	TGCAGGTGG
AR	hTFtarget	NW_012015244.1:18944122-18946122	934	949	+	12.7324	2.03e-05	0.0399	GAGCACACATTGTGCT
FLI1	hTFtarget	NW_012015244.1:18944122-18946122	399	420	+	-5.51429	2.03e-05	0.0384	TCCCTCTCTCTTCTTACCCTCT
RELA	hTFtarget	NW_012015244.1:18944122-18946122	911	926	+	12.2051	2.03e-05	0.0759	CATGAAATGGAAATAA
SPI1	hTFtarget	NW_012015244.1:18944122-18946122	1583	1594	-	12.7105	2.03e-05	0.081	GGGGGGTGGAAC
TAL1:TCF3	database	NW_012015244.1:18944122-18946122	1808	1819	-	13.1798	2.04e-05	0.0404	CCAACATCTGTA
JUN	hTFtarget	NW_012015244.1:18944122-18946122	1185	1196	+	13.1039	2.04e-05	0.0403	ATGATATCATGA
SPI1	hTFtarget	NW_012015244.1:18944122-18946122	1579	1594	+	12.75	2.04e-05	0.081	GCTTGTTCCACCCCCC
ZNF238	database	NW_012015244.1:18944122-18946122	1760	1773	-	11.0918	2.04e-05	0.0404	ACCAGATGTTTTTC
FOXP3	database	NW_012015244.1:18944122-18946122	1314	1322	-	12.7568	2.05e-05	0.0749	AATGTGTTT
MYEF2	database	NW_012015244.1:18944122-18946122	528	549	+	11.378	2.05e-05	0.0694	GGCAGTGCTAAAGATAGTTGCA
FOXA1	hTFtarget	NW_012015244.1:18944122-18946122	1285	1301	-	13.0758	2.05e-05	0.0763	CTCCTGTTTATATAAGG
GABPA	hTFtarget	NW_012015244.1:18944122-18946122	1955	1963	+	12.8143	2.05e-05	0.0811	AAAGGAAGT
OTX2	hTFtarget	NW_012015244.1:18944122-18946122	1066	1074	+	13.1184	2.05e-05	0.0407	CACAGCTGG
SPI1	hTFtarget	NW_012015244.1:18944122-18946122	1581	1594	-	12.4868	2.05e-05	0.0814	GGGGGGTGGAACAA
EP300	hTFtarget	NW_012015244.1:18944122-18946122	1289	1297	+	13.026	2.05e-05	0.0692	ATATAAACA
FOXP3	database	NW_012015244.1:18944122-18946122	1314	1322	+	12.83	2.05e-05	0.0749	AAACACATT
TAL1	database	NW_012015244.1:18944122-18946122	1749	1773	-	10.2022	2.06e-05	0.0535	ACCAGATGTTTTTCTCATAGAAGAA
ZBTB18	database	NW_012015244.1:18944122-18946122	1760	1773	-	11.102	2.06e-05	0.0409	ACCAGATGTTTTTC
SP1	hTFtarget	NW_012015244.1:18944122-18946122	1583	1594	-	12.7105	2.06e-05	0.0822	GGGGGGTGGAAC
SPI1	hTFtarget	NW_012015244.1:18944122-18946122	1578	1601	-	11.9605	2.06e-05	0.0815	CAGGCCTGGGGGGTGGAACAAGCA
ETS1	hTFtarget	NW_012015244.1:18944122-18946122	509	524	+	12.5263	2.07e-05	0.0818	GCCCTGGGAGCAGCGC
HDAC2	hTFtarget	NW_012015244.1:18944122-18946122	82	93	+	13.0921	2.07e-05	0.0238	CTTCCAGCTGGT
MEF2C	hTFtarget	NW_012015244.1:18944122-18946122	402	413	+	13.2368	2.07e-05	0.0437	CTCTCTCTTCTT
MYC	hTFtarget	NW_012015244.1:18944122-18946122	1077	1088	+	12.9737	2.08e-05	0.0824	AAAGATGGAGCC
SPI1	hTFtarget	NW_012015244.1:18944122-18946122	851	868	-	11.0758	2.08e-05	0.0243	TGTACATTTCTTCATTTT
EOMES	hTFtarget	NW_012015244.1:18944122-18946122	1921	1929	-	12.7571	2.08e-05	0.0411	CCTGCAGAG
NFIB	database	NW_012015244.1:18944122-18946122	948	962	-	9.4898	2.08e-05	0.0826	TTGGCATATAGCAAG
ZBTB3	database	NW_012015244.1:18944122-18946122	41	49	+	10.72	2.08e-05	0.0409	AGTGCAGTG
FLI1	database	NW_012015244.1:18944122-18946122	681	691	-	13.0714	2.09e-05	0.083	AAGGAAGTCAG
HAND2	hTFtarget	NW_012015244.1:18944122-18946122	1078	1093	-	12.9848	2.09e-05	0.0827	GTCTGGGCTCCATCTT
SALL4	hTFtarget	NW_012015244.1:18944122-18946122	1858	1868	+	12.9079	2.09e-05	0.0676	GGCAGCAGGTG
SPI1	hTFtarget	NW_012015244.1:18944122-18946122	487	495	-	13.0395	2.09e-05	0.0831	CACTTCCAG
AR	hTFtarget	NW_012015244.1:18944122-18946122	466	477	+	12.8333	2.09e-05	0.0783	TCTGTTTGCACA
ZBTB33	hTFtarget	NW_012015244.1:18944122-18946122	606	621	-	12.6506	2.1e-05	0.0789	CTCTGGGTGATGGTGT
AR	hTFtarget	NW_012015244.1:18944122-18946122	936	949	+	12.6212	2.1e-05	0.0412	GCACACATTGTGCT
AR	hTFtarget	NW_012015244.1:18944122-18946122	935	950	-	12.6143	2.11e-05	0.0605	AAGCACAATGTGTGCT
SPI1	hTFtarget	NW_012015244.1:18944122-18946122	136	151	+	9.80303	2.11e-05	0.0358	AGAGAAGCAGAAGTGA
USF2	hTFtarget	NW_012015244.1:18944122-18946122	684	695	+	12.747	2.11e-05	0.0409	ACTTCCTTCCCT
CREBBP	hTFtarget	NW_012015244.1:18944122-18946122	704	719	-	2	2.11e-05	0.0415	GAAAGAGTCAAAGAGA
AR	hTFtarget	NW_012015244.1:18944122-18946122	934	949	+	12.6857	2.12e-05	0.0398	GAGCACACATTGTGCT
BCL11A	hTFtarget	NW_012015244.1:18944122-18946122	226	234	-	13.75	2.12e-05	0.0811	AAATTCCAG
CBX3	hTFtarget	NW_012015244.1:18944122-18946122	443	464	-	8.88312	2.12e-05	0.0802	AGAAACCTTTGGGCCAAGAATG
EHF	hTFtarget	NW_012015244.1:18944122-18946122	393	414	-	12.6438	2.12e-05	0.0202	TAAGAAGAGAGAGGGAGGCTGC
MYC	hTFtarget	NW_012015244.1:18944122-18946122	479	494	-	12.6923	2.13e-05	0.0273	ACTTCCAGTCTTCCTC
SPI1	hTFtarget	NW_012015244.1:18944122-18946122	1577	1594	+	12.0921	2.13e-05	0.0845	CTGCTTGTTCCACCCCCC
FOXA1	hTFtarget	NW_012015244.1:18944122-18946122	935	949	-	12.7121	2.14e-05	0.0412	AGCACAATGTGTGCT
BRD2	hTFtarget	NW_012015244.1:18944122-18946122	181	196	-	11.6184	2.15e-05	0.0852	CAGAGACAGGTACTCA
TFAP2C	hTFtarget	NW_012015244.1:18944122-18946122	1590	1601	-	12.9242	2.15e-05	0.0851	CAGGCCTGGGGG
NCOR1	hTFtarget	NW_012015244.1:18944122-18946122	1952	1963	+	12.9143	2.16e-05	0.0509	ATAAAAGGAAGT
SOX2	hTFtarget	NW_012015244.1:18944122-18946122	719	727	-	12.7632	2.16e-05	0.0861	ACCAGCAGG
TCF12	hTFtarget	NW_012015244.1:18944122-18946122	684	695	+	12.7424	2.16e-05	0.0468	ACTTCCTTCCCT
LYL1	database	NW_012015244.1:18944122-18946122	1749	1773	+	10.2245	2.16e-05	0.057	TTCTTCTATGAGAAAAACATCTGGT
ZSCAN10	database	NW_012015244.1:18944122-18946122	488	498	+	13.4796	2.16e-05	0.0858	TGGAAGTGCTA
STAT1	database	NW_012015244.1:18944122-18946122	729	738	-	12.6506	2.17e-05	0.0531	TTCTAGGAAG
STAT5A	hTFtarget	NW_012015244.1:18944122-18946122	729	740	+	13.0303	2.17e-05	0.0801	CTTCCTAGAATC
AR	hTFtarget	NW_012015244.1:18944122-18946122	935	950	+	12.5758	2.17e-05	0.0425	AGCACACATTGTGCTT
HOXA5	database	NW_012015244.1:18944122-18946122	37	44	-	10.82	2.18e-05	0.0821	CACTAATT
STAT6	database	NW_012015244.1:18944122-18946122	918	925	-	9.08824	2.18e-05	0.0845	TATTTCCA
HOXA5	database	NW_012015244.1:18944122-18946122	37	44	-	10.82	2.18e-05	0.0819	CACTAATT
PBX1	hTFtarget	NW_012015244.1:18944122-18946122	1583	1594	-	12.7632	2.18e-05	0.0869	GGGGGGTGGAAC
RXRG	hTFtarget	NW_012015244.1:18944122-18946122	485	496	-	12.7429	2.18e-05	0.0432	GCACTTCCAGTC
STAT3	hTFtarget	NW_012015244.1:18944122-18946122	1397	1418	-	12.5065	2.18e-05	0.0863	CCAATCGCAAAAGCTGTTGTTC
SNAI3	database	NW_012015244.1:18944122-18946122	147	156	+	10.2727	2.18e-05	0.0868	AGTGACAGGT
OTX2	hTFtarget	NW_012015244.1:18944122-18946122	1111	1119	-	13.0658	2.19e-05	0.0839	AGACAAAGG
PALB2	hTFtarget	NW_012015244.1:18944122-18946122	894	909	-	12.7976	2.19e-05	0.076	GGTTTTTTTCCCTTGT
SPI1	hTFtarget	NW_012015244.1:18944122-18946122	688	703	+	12.6053	2.19e-05	0.0357	CCTTCCCTTCCCTGAA
NANOG	hTFtarget	NW_012015244.1:18944122-18946122	719	727	-	13.0395	2.2e-05	0.0749	ACCAGCAGG
NANOG	hTFtarget	NW_012015244.1:18944122-18946122	1066	1074	+	13	2.2e-05	0.0552	CACAGCTGG
TP53	hTFtarget	NW_012015244.1:18944122-18946122	1502	1510	+	13.4868	2.2e-05	0.0437	CCTGTGTGG
STAT5B	database	NW_012015244.1:18944122-18946122	728	740	+	12.6707	2.21e-05	0.0851	GCTTCCTAGAATC
TGIF1	database	NW_012015244.1:18944122-18946122	146	156	-	13.1939	2.21e-05	0.0855	ACCTGTCACTT
EZH2	hTFtarget	NW_012015244.1:18944122-18946122	404	425	+	12.5455	2.21e-05	0.0699	CTCTCTTCTTACCCTCTGCCTG
GLI2	hTFtarget	NW_012015244.1:18944122-18946122	1583	1594	-	12.9	2.21e-05	0.088	GGGGGGTGGAAC
SPI1	hTFtarget	NW_012015244.1:18944122-18946122	1410	1421	-	13.0263	2.21e-05	0.0881	CTGCCAATCGCA
FOXQ1	database	NW_012015244.1:18944122-18946122	1289	1300	-	11.7551	2.22e-05	0.0415	TCCTGTTTATAT
AR	hTFtarget	NW_012015244.1:18944122-18946122	935	950	+	12.4242	2.22e-05	0.0526	AGCACACATTGTGCTT
GTF3C2	hTFtarget	NW_012015244.1:18944122-18946122	742	766	+	8.01299	2.22e-05	0.0182	CCACCAAAAAAAAAAAAAAAAATTC
IRF2	hTFtarget	NW_012015244.1:18944122-18946122	312	330	+	9.63636	2.22e-05	0.0836	GTAATAAAAACTGAAAAAA
NANOG	hTFtarget	NW_012015244.1:18944122-18946122	1066	1074	+	12.7105	2.22e-05	0.0681	CACAGCTGG
NANOG	hTFtarget	NW_012015244.1:18944122-18946122	719	727	-	12.8947	2.22e-05	0.0615	ACCAGCAGG
BRD4	hTFtarget	NW_012015244.1:18944122-18946122	406	430	-	12.1818	2.22e-05	0.0323	AGTCACAGGCAGAGGGTAAGAAGAG
STAT3	hTFtarget	NW_012015244.1:18944122-18946122	873	888	-	12.7879	2.22e-05	0.0834	GATTTACAAGAAGTTG
FOXQ1	database	NW_012015244.1:18944122-18946122	1289	1300	+	11.7449	2.22e-05	0.0413	ATATAAACAGGA
STAT5B	database	NW_012015244.1:18944122-18946122	728	740	+	12.6429	2.22e-05	0.0854	GCTTCCTAGAATC
ICE2	hTFtarget	NW_012015244.1:18944122-18946122	600	622	-	10.6316	2.23e-05	0.0554	CCTCTGGGTGATGGTGTAGCCTA
SP2	hTFtarget	NW_012015244.1:18944122-18946122	747	768	-	12.5	2.23e-05	0.0261	AGGAATTTTTTTTTTTTTTTTT
SPI1	hTFtarget	NW_012015244.1:18944122-18946122	1583	1598	+	12.4857	2.23e-05	0.0886	GTTCCACCCCCCAGGC
YY1	hTFtarget	NW_012015244.1:18944122-18946122	1077	1088	+	12.7368	2.23e-05	0.0871	AAAGATGGAGCC
AR	hTFtarget	NW_012015244.1:18944122-18946122	934	949	-	12.5455	2.23e-05	0.0424	AGCACAATGTGTGCTC
AR	hTFtarget	NW_012015244.1:18944122-18946122	468	479	-	12.7222	2.23e-05	0.0698	CATGTGCAAACA
ERG	hTFtarget	NW_012015244.1:18944122-18946122	934	949	+	12.7237	2.24e-05	0.0434	GAGCACACATTGTGCT
PML	hTFtarget	NW_012015244.1:18944122-18946122	682	693	+	12.6	2.24e-05	0.0885	TGACTTCCTTCC
SPI1	hTFtarget	NW_012015244.1:18944122-18946122	1583	1594	-	12.8571	2.24e-05	0.089	GGGGGGTGGAAC
SP1	hTFtarget	NW_012015244.1:18944122-18946122	1575	1596	-	11.0303	2.26e-05	0.0895	CTGGGGGGTGGAACAAGCAGGG
GLIS3	database	NW_012015244.1:18944122-18946122	1587	1596	-	12.6517	2.27e-05	0.0905	CTGGGGGGTG
ESR1	hTFtarget	NW_012015244.1:18944122-18946122	141	165	+	11.6716	2.27e-05	0.023	AGCAGAAGTGACAGGTAGGGAGACA
SPI1	hTFtarget	NW_012015244.1:18944122-18946122	1937	1953	-	11.2576	2.27e-05	0.0437	ATTTGAAGAACTGCAAG
SPI1	hTFtarget	NW_012015244.1:18944122-18946122	1578	1593	+	12.3816	2.27e-05	0.0902	TGCTTGTTCCACCCCC
AR	hTFtarget	NW_012015244.1:18944122-18946122	931	942	-	12.974	2.27e-05	0.0458	TGTGTGCTCATC
EOMES	hTFtarget	NW_012015244.1:18944122-18946122	719	727	-	13.0526	2.27e-05	0.0787	ACCAGCAGG
GLIS3	database	NW_012015244.1:18944122-18946122	1587	1596	-	12.6327	2.27e-05	0.0905	CTGGGGGGTG
TGIF2LY	database	NW_012015244.1:18944122-18946122	147	156	-	10.9796	2.27e-05	0.0906	ACCTGTCACT
NR2F1	database	NW_012015244.1:18944122-18946122	1695	1708	+	12.3163	2.28e-05	0.09	GGACCTTAAAACCT
COUP-TF:HNF4	database	NW_012015244.1:18944122-18946122	1695	1708	+	12.3163	2.28e-05	0.09	GGACCTTAAAACCT
TAF1	hTFtarget	NW_012015244.1:18944122-18946122	385	408	-	12.25	2.28e-05	0.0296	GAGAGAGGGAGGCTGCTGAGAGGA
TP53	hTFtarget	NW_012015244.1:18944122-18946122	1040	1051	-	12.9079	2.28e-05	0.09	CTAGGCAAGCTC
NKX2-8	database	NW_012015244.1:18944122-18946122	1268	1276	+	13.0328	2.29e-05	0.0911	CTCAAGGAC
MEF2C	hTFtarget	NW_012015244.1:18944122-18946122	317	328	-	13.1184	2.29e-05	0.0437	TTTTCAGTTTTT
NFAT5	hTFtarget	NW_012015244.1:18944122-18946122	226	240	+	12.1579	2.29e-05	0.0837	CTGGAATTTTCATCA
SPI1	hTFtarget	NW_012015244.1:18944122-18946122	1951	1967	-	11.2727	2.29e-05	0.0444	TTAGACTTCCTTTTATT
STAT5B	hTFtarget	NW_012015244.1:18944122-18946122	725	740	-	12.9697	2.29e-05	0.0634	GATTCTAGGAAGCACC
CREB1	hTFtarget	NW_012015244.1:18944122-18946122	399	423	+	11.9865	2.29e-05	0.0215	TCCCTCTCTCTTCTTACCCTCTGCC
EP300	hTFtarget	NW_012015244.1:18944122-18946122	1912	1920	-	12.9079	2.29e-05	0.0456	TCCCCAGGG
SP1	database	NW_012015244.1:18944122-18946122	1583	1593	+	13.0192	2.3e-05	0.091	GTTCCACCCCC
POLR2A	hTFtarget	NW_012015244.1:18944122-18946122	1850	1865	-	11.1842	2.3e-05	0.0896	CTGCTGCCACAGCTTC
SMAD1	hTFtarget	NW_012015244.1:18944122-18946122	719	727	-	12.6447	2.3e-05	0.0916	ACCAGCAGG
SPI1	hTFtarget	NW_012015244.1:18944122-18946122	1010	1025	+	12.5789	2.3e-05	0.0912	CCCTGTGAAGTAGAGT
AR	hTFtarget	NW_012015244.1:18944122-18946122	468	478	+	12.7083	2.3e-05	0.0852	TGTTTGCACAT
TFAP2C	hTFtarget	NW_012015244.1:18944122-18946122	1909	1920	+	12.9697	2.31e-05	0.0458	AGGCCCTGGGGA
CDK8	hTFtarget	NW_012015244.1:18944122-18946122	914	929	-	12.5974	2.31e-05	0.022	TTTTTATTTCCATTTC
FOXA1	hTFtarget	NW_012015244.1:18944122-18946122	1285	1300	+	12.9545	2.32e-05	0.0871	CCTTATATAAACAGGA
GATA4	hTFtarget	NW_012015244.1:18944122-18946122	719	727	-	12.9737	2.32e-05	0.0558	ACCAGCAGG
TFCP2	database	NW_012015244.1:18944122-18946122	168	183	+	12.5714	2.33e-05	0.0922	CCCTGTCAACACCTGA
MAFB	hTFtarget	NW_012015244.1:18944122-18946122	1852	1863	-	11.7763	2.33e-05	0.0929	GCTGCCACAGCT
BCOR	hTFtarget	NW_012015244.1:18944122-18946122	1938	1949	-	12.4028	2.33e-05	0.0638	GAAGAACTGCAA
NR3C1	hTFtarget	NW_012015244.1:18944122-18946122	935	949	+	12.4848	2.33e-05	0.0553	AGCACACATTGTGCT
SPI1	hTFtarget	NW_012015244.1:18944122-18946122	137	151	-	12.6711	2.33e-05	0.0774	TCACTTCTGCTTCTC
C17orf96	hTFtarget	NW_012015244.1:18944122-18946122	401	425	-	12.3671	2.33e-05	0.0308	CAGGCAGAGGGTAAGAAGAGAGAGG
CDK9	hTFtarget	NW_012015244.1:18944122-18946122	138	153	+	12.6667	2.33e-05	0.0273	AGAAGCAGAAGTGACA
TFCP2	database	NW_012015244.1:18944122-18946122	168	183	+	12.5714	2.33e-05	0.0925	CCCTGTCAACACCTGA
SPI1	hTFtarget	NW_012015244.1:18944122-18946122	1579	1594	+	12.3289	2.34e-05	0.0931	GCTTGTTCCACCCCCC
SPI1	hTFtarget	NW_012015244.1:18944122-18946122	688	703	-	12.5584	2.34e-05	0.0927	TTCAGGGAAGGGAAGG
AR	hTFtarget	NW_012015244.1:18944122-18946122	468	479	-	12.5972	2.34e-05	0.0665	CATGTGCAAACA
HOXB4	database	NW_012015244.1:18944122-18946122	336	352	+	12.1561	2.35e-05	0.0864	GGGAATAATTAATAACT
SP1	hTFtarget	NW_012015244.1:18944122-18946122	1583	1594	-	12.2895	2.35e-05	0.0936	GGGGGGTGGAAC
ETS1	hTFtarget	NW_012015244.1:18944122-18946122	606	621	-	10.5526	2.36e-05	0.0934	CTCTGGGTGATGGTGT
RELA	hTFtarget	NW_012015244.1:18944122-18946122	912	923	+	11.1316	2.36e-05	0.0887	ATGAAATGGAAA
SPI1	hTFtarget	NW_012015244.1:18944122-18946122	1583	1594	-	12.6711	2.36e-05	0.0938	GGGGGGTGGAAC
TP53	hTFtarget	NW_012015244.1:18944122-18946122	1471	1490	+	10.7632	2.36e-05	0.0936	TCAGCGTGTGTAATGAGGTA
ERG	hTFtarget	NW_012015244.1:18944122-18946122	396	411	+	11.3947	2.36e-05	0.0451	GCCTCCCTCTCTCTTC
SPI1	hTFtarget	NW_012015244.1:18944122-18946122	689	700	+	12.8571	2.37e-05	0.0681	CTTCCCTTCCCT
TCF12	hTFtarget	NW_012015244.1:18944122-18946122	1970	1981	+	12.6818	2.37e-05	0.0468	GCTTCCTGACTC
CDX2	hTFtarget	NW_012015244.1:18944122-18946122	309	320	+	13.0139	2.37e-05	0.0919	GATGTAATAAAA
RFX5	database	NW_012015244.1:18944122-18946122	274	289	+	9.50505	2.37e-05	0.0471	TGTTGGTATAGTGACA
FOXA2	hTFtarget	NW_012015244.1:18944122-18946122	1575	1599	-	10.6316	2.38e-05	0.094	GGCCTGGGGGGTGGAACAAGCAGGG
AR	hTFtarget	NW_012015244.1:18944122-18946122	468	478	+	12.6111	2.38e-05	0.0916	TGTTTGCACAT
LMO2	hTFtarget	NW_012015244.1:18944122-18946122	713	724	+	12.7	2.38e-05	0.093	CTCTTTCCTGCT
RELA	hTFtarget	NW_012015244.1:18944122-18946122	1927	1938	-	12.5909	2.38e-05	0.0829	AGGAAACCACCT
ZNF263	hTFtarget	NW_012015244.1:18944122-18946122	514	522	-	13.8429	2.38e-05	0.0946	GCTGCTCCC
CREB1	hTFtarget	NW_012015244.1:18944122-18946122	147	171	+	-6.33333	2.38e-05	0.0933	AGTGACAGGTAGGGAGACAAACCCT
ELF1	hTFtarget	NW_012015244.1:18944122-18946122	1971	1982	+	12.9211	2.38e-05	0.0937	CTTCCTGACTCT
NR3C1	database	NW_012015244.1:18944122-18946122	933	951	-	11.8652	2.39e-05	0.0466	CAAGCACAATGTGTGCTCA
FOXA1	hTFtarget	NW_012015244.1:18944122-18946122	468	476	-	12.1528	2.39e-05	0.0924	GTGCAAACA
AR	hTFtarget	NW_012015244.1:18944122-18946122	468	476	-	12.2917	2.39e-05	0.0922	GTGCAAACA
NANOG	hTFtarget	NW_012015244.1:18944122-18946122	1111	1119	-	12.7792	2.39e-05	0.0914	AGACAAAGG
SMAD3	hTFtarget	NW_012015244.1:18944122-18946122	1921	1932	-	12.3429	2.39e-05	0.0946	CCACCTGCAGAG
TAF1	hTFtarget	NW_012015244.1:18944122-18946122	1285	1293	+	12.3846	2.39e-05	0.0863	CCTTATATA
MAFF	database	NW_012015244.1:18944122-18946122	1851	1865	-	10.2347	2.39e-05	0.0904	CTGCTGCCACAGCTT
AR	hTFtarget	NW_012015244.1:18944122-18946122	467	478	+	12.7639	2.4e-05	0.0914	CTGTTTGCACAT
STAT1	hTFtarget	NW_012015244.1:18944122-18946122	875	890	+	12.5909	2.41e-05	0.0928	ACTTCTTGTAAATCAA
TP53	hTFtarget	NW_012015244.1:18944122-18946122	329	340	+	12.5395	2.41e-05	0.0459	AAAATGAGGGAA
ZBTB17	hTFtarget	NW_012015244.1:18944122-18946122	158	176	-	12.2262	2.41e-05	0.0475	TTGACAGGGTTTGTCTCCC
CREBBP	hTFtarget	NW_012015244.1:18944122-18946122	1218	1226	-	13.2857	2.41e-05	0.0447	GTATAAACA
AR	hTFtarget	NW_012015244.1:18944122-18946122	468	479	+	12.9221	2.41e-05	0.0458	TGTTTGCACATG
ZNF263	database	NW_012015244.1:18944122-18946122	139	159	+	11.5918	2.42e-05	0.0436	GAAGCAGAAGTGACAGGTAGG
HDAC2	hTFtarget	NW_012015244.1:18944122-18946122	1066	1077	-	12.8816	2.42e-05	0.0238	TTACCAGCTGTG
RBCK1	hTFtarget	NW_012015244.1:18944122-18946122	1583	1594	+	12.6184	2.42e-05	0.0964	GTTCCACCCCCC
CBX3	hTFtarget	NW_012015244.1:18944122-18946122	1178	1193	-	11.9474	2.42e-05	0.0923	TGATATCATGCCATTA
TCF3	hTFtarget	NW_012015244.1:18944122-18946122	314	327	+	12.5263	2.42e-05	0.0445	AATAAAAACTGAAA
EGR2	database	NW_012015244.1:18944122-18946122	102	116	-	12.5574	2.43e-05	0.0966	CTGCCTCCCACAGAG
ESR1	hTFtarget	NW_012015244.1:18944122-18946122	881	894	+	12.6623	2.43e-05	0.0895	TGTAAATCAAGTTA
LMO2	hTFtarget	NW_012015244.1:18944122-18946122	1861	1869	+	12.8684	2.43e-05	0.0589	AGCAGGTGT
NANOG	hTFtarget	NW_012015244.1:18944122-18946122	719	727	-	12.6184	2.43e-05	0.0483	ACCAGCAGG
NANOG	hTFtarget	NW_012015244.1:18944122-18946122	1921	1929	+	12.6184	2.43e-05	0.0483	CTCTGCAGG
POU4F3	database	NW_012015244.1:18944122-18946122	844	859	-	12.3701	2.43e-05	0.0429	CTTCATTTTTAATGTA
FOXA1	hTFtarget	NW_012015244.1:18944122-18946122	114	128	-	13.0303	2.44e-05	0.0912	ACAATGTCAATACTG
SPI1	hTFtarget	NW_012015244.1:18944122-18946122	1578	1599	-	10.9211	2.44e-05	0.0967	GGCCTGGGGGGTGGAACAAGCA
SPI1	hTFtarget	NW_012015244.1:18944122-18946122	1938	1953	-	11.1	2.44e-05	0.0473	ATTTGAAGAACTGCAA
TAF3	hTFtarget	NW_012015244.1:18944122-18946122	715	730	-	12.5789	2.44e-05	0.0658	AGCACCAGCAGGAAAG
SPI1	database	NW_012015244.1:18944122-18946122	138	156	-	12.6742	2.45e-05	0.061	ACCTGTCACTTCTGCTTCT
GATA1	hTFtarget	NW_012015244.1:18944122-18946122	1117	1130	-	9.43421	2.45e-05	0.0965	ACAAACAGCACAGA
GATA4	hTFtarget	NW_012015244.1:18944122-18946122	226	234	-	12.6143	2.45e-05	0.0942	AAATTCCAG
POLR2A	hTFtarget	NW_012015244.1:18944122-18946122	1850	1871	+	9.46053	2.45e-05	0.097	GAAGCTGTGGCAGCAGGTGTGA
SMAD1	hTFtarget	NW_012015244.1:18944122-18946122	475	486	+	12.75	2.45e-05	0.0474	ACATGAGGAAGA
SPI1	hTFtarget	NW_012015244.1:18944122-18946122	398	413	+	12.5789	2.45e-05	0.0477	CTCCCTCTCTCTTCTT
TCF12	hTFtarget	NW_012015244.1:18944122-18946122	606	627	+	10.3553	2.45e-05	0.0968	ACACCATCACCCAGAGGTCTAT
TP53	hTFtarget	NW_012015244.1:18944122-18946122	150	165	+	12.1324	2.45e-05	0.0471	GACAGGTAGGGAGACA
AR	hTFtarget	NW_012015244.1:18944122-18946122	467	478	-	12.4861	2.46e-05	0.0956	ATGTGCAAACAG
GATA3	hTFtarget	NW_012015244.1:18944122-18946122	468	477	-	12.7532	2.46e-05	0.0907	TGTGCAAACA
TAL1	hTFtarget	NW_012015244.1:18944122-18946122	723	734	+	12.3947	2.46e-05	0.0971	CTGGTGCTTCCT
CREB1	hTFtarget	NW_012015244.1:18944122-18946122	935	950	+	12.4286	2.46e-05	0.0487	AGCACACATTGTGCTT
SPI1	hTFtarget	NW_012015244.1:18944122-18946122	1578	1593	+	12.3571	2.47e-05	0.0982	TGCTTGTTCCACCCCC
SPI1	hTFtarget	NW_012015244.1:18944122-18946122	1581	1596	-	12.1974	2.47e-05	0.098	CTGGGGGGTGGAACAA
SPI1	hTFtarget	NW_012015244.1:18944122-18946122	683	694	-	12.7286	2.47e-05	0.0501	GGGAAGGAAGTC
TP63	hTFtarget	NW_012015244.1:18944122-18946122	1345	1357	-	12.7273	2.47e-05	0.0828	CAAGAACTGACAT
TRIM28	hTFtarget	NW_012015244.1:18944122-18946122	1192	1203	-	12.2105	2.47e-05	0.0963	AATACTTTCATG
FLI1	hTFtarget	NW_012015244.1:18944122-18946122	714	725	+	12.9091	2.48e-05	0.0489	TCTTTCCTGCTG
IRF1	hTFtarget	NW_012015244.1:18944122-18946122	316	332	+	11.5455	2.48e-05	0.0935	TAAAAACTGAAAAAAAA
PGR	hTFtarget	NW_012015244.1:18944122-18946122	1572	1587	+	12.0746	2.48e-05	0.0707	AGGCCCTGCTTGTTCC
SPI1	hTFtarget	NW_012015244.1:18944122-18946122	850	865	+	10.3788	2.49e-05	0.032	AAAAATGAAGAAATGT
EOMES	hTFtarget	NW_012015244.1:18944122-18946122	719	727	-	12.9868	2.49e-05	0.0586	ACCAGCAGG
FLI1	hTFtarget	NW_012015244.1:18944122-18946122	684	695	+	-3.75714	2.5e-05	0.0975	ACTTCCTTCCCT
FOXA1	hTFtarget	NW_012015244.1:18944122-18946122	1285	1300	-	12.8939	2.5e-05	0.0952	TCCTGTTTATATAAGG
GATA6	hTFtarget	NW_012015244.1:18944122-18946122	466	477	-	12.8182	2.5e-05	0.0931	TGTGCAAACAGA
SPI1	hTFtarget	NW_012015244.1:18944122-18946122	1583	1594	-	12.1447	2.5e-05	0.0996	GGGGGGTGGAAC
STAT5A	hTFtarget	NW_012015244.1:18944122-18946122	457	472	-	8.09211	2.5e-05	0.0973	AAACAGAAAGAAACCT
TWIST1	database	NW_012015244.1:18944122-18946122	1860	1869	+	13.2245	2.5e-05	0.0995	CAGCAGGTGT
FOXA1	hTFtarget	NW_012015244.1:18944122-18946122	1285	1300	+	12.9701	2.51e-05	0.0943	CCTTATATAAACAGGA
BRD4	hTFtarget	NW_012015244.1:18944122-18946122	317	341	+	11.9481	2.51e-05	0.0323	AAAAACTGAAAAAAAATGAGGGAAT
SPI1	hTFtarget	NW_012015244.1:18944122-18946122	142	153	+	12.0758	2.51e-05	0.0482	GCAGAAGTGACA
SPIC	database	NW_012015244.1:18944122-18946122	1951	1964	+	12.4343	2.51e-05	0.0546	AATAAAAGGAAGTC
KDM5B	hTFtarget	NW_012015244.1:18944122-18946122	747	762	-	12.3889	2.52e-05	0.0315	TTTTTTTTTTTTTTTT
KDM5B	hTFtarget	NW_012015244.1:18944122-18946122	748	763	-	12.3889	2.52e-05	0.0315	TTTTTTTTTTTTTTTT
ZNF143	hTFtarget	NW_012015244.1:18944122-18946122	1008	1027	+	6.12857	2.52e-05	0.0997	AACCCTGTGAAGTAGAGTCC
EOMES	hTFtarget	NW_012015244.1:18944122-18946122	1066	1074	+	12.8553	2.52e-05	0.0498	CACAGCTGG
NEUROG3	database	NW_012015244.1:18944122-18946122	1860	1871	+	12.7755	2.52e-05	0.0998	CAGCAGGTGTGA
ARRB1	hTFtarget	NW_012015244.1:18944122-18946122	684	701	-	10.1084	2.53e-05	0.0964	CAGGGAAGGGAAGGAAGT
SPI1	hTFtarget	NW_012015244.1:18944122-18946122	1953	1964	+	12.7	2.53e-05	0.0501	TAAAAGGAAGTC
TRIM28	hTFtarget	NW_012015244.1:18944122-18946122	391	402	-	12.6711	2.53e-05	0.1	GGGAGGCTGCTG
EP300	hTFtarget	NW_012015244.1:18944122-18946122	682	696	-	12.5286	2.53e-05	0.0857	AAGGGAAGGAAGTCA
NEUROD1	database	NW_012015244.1:18944122-18946122	1860	1871	+	12.764	2.54e-05	0.101	CAGCAGGTGTGA
ESR1	hTFtarget	NW_012015244.1:18944122-18946122	146	167	+	11.194	2.54e-05	0.0415	AAGTGACAGGTAGGGAGACAAA
NR3C1	hTFtarget	NW_012015244.1:18944122-18946122	934	949	+	12.3636	2.54e-05	0.0498	GAGCACACATTGTGCT
RELA	hTFtarget	NW_012015244.1:18944122-18946122	1927	1938	-	12.4242	2.54e-05	0.0835	AGGAAACCACCT
RNF2	hTFtarget	NW_012015244.1:18944122-18946122	604	619	-	12.7857	2.54e-05	0.0505	CTGGGTGATGGTGTAG
BCL6	database	NW_012015244.1:18944122-18946122	730	745	+	12.0606	2.54e-05	0.0933	TTCCTAGAATCACCAC
SMAD1	hTFtarget	NW_012015244.1:18944122-18946122	685	698	-	12.2857	2.55e-05	0.0506	GGAAGGGAAGGAAG
AR	hTFtarget	NW_012015244.1:18944122-18946122	933	948	-	12.3182	2.55e-05	0.0496	GCACAATGTGTGCTCA
ELF1	hTFtarget	NW_012015244.1:18944122-18946122	1010	1025	-	12.3816	2.55e-05	0.0506	ACTCTACTTCACAGGG
BCL6	database	NW_012015244.1:18944122-18946122	730	745	-	12.0556	2.56e-05	0.094	GTGGTGATTCTAGGAA
SMAD3	database	NW_012015244.1:18944122-18946122	1446	1455	-	11.8171	2.56e-05	0.0568	ATGTCTGCCC
AR	hTFtarget	NW_012015244.1:18944122-18946122	468	478	+	12.4028	2.56e-05	0.0986	TGTTTGCACAT
TFAP4	hTFtarget	NW_012015244.1:18944122-18946122	1955	1963	-	12.5286	2.56e-05	0.0949	ACTTCCTTT
ETV7	database	NW_012015244.1:18944122-18946122	679	695	-	9.80612	2.56e-05	0.101	AGGGAAGGAAGTCAGTT
SMAD3	database	NW_012015244.1:18944122-18946122	1446	1455	-	11.8265	2.56e-05	0.0586	ATGTCTGCCC
TWIST1	database	NW_012015244.1:18944122-18946122	1860	1869	+	13.1382	2.57e-05	0.102	CAGCAGGTGT
ESR1	hTFtarget	NW_012015244.1:18944122-18946122	780	795	+	11.7632	2.57e-05	0.101	CTGTTTCTGAGGTAAC
NIPBL	hTFtarget	NW_012015244.1:18944122-18946122	468	478	+	13.013	2.57e-05	0.0735	TGTTTGCACAT
SMAD2/SMAD3	hTFtarget	NW_012015244.1:18944122-18946122	1921	1929	+	12.7763	2.57e-05	0.0376	CTCTGCAGG
TEAD4	hTFtarget	NW_012015244.1:18944122-18946122	220	236	-	12.4545	2.57e-05	0.102	GAAAATTCCAGTCACTC
TRIM63	database	NW_012015244.1:18944122-18946122	318	332	-	12.7191	2.58e-05	0.0999	TTTTTTTTCAGTTTT
FLI1	hTFtarget	NW_012015244.1:18944122-18946122	684	695	-	10.8684	2.59e-05	0.0338	AGGGAAGGAAGT
SPI1	hTFtarget	NW_012015244.1:18944122-18946122	1937	1954	+	10.5758	2.59e-05	0.0243	CTTGCAGTTCTTCAAATA
THAP11	hTFtarget	NW_012015244.1:18944122-18946122	606	627	+	10.5526	2.59e-05	0.103	ACACCATCACCCAGAGGTCTAT
ESR1	hTFtarget	NW_012015244.1:18944122-18946122	401	409	-	12.7042	2.6e-05	0.0641	AGAGAGAGG
BCL6	hTFtarget	NW_012015244.1:18944122-18946122	684	695	-	12.6143	2.6e-05	0.0514	AGGGAAGGAAGT
PAX6	hTFtarget	NW_012015244.1:18944122-18946122	1921	1929	-	12.6842	2.6e-05	0.103	CCTGCAGAG
POLR3A	hTFtarget	NW_012015244.1:18944122-18946122	847	862	+	12.4872	2.6e-05	0.0114	ATTAAAAATGAAGAAA
SIX5	hTFtarget	NW_012015244.1:18944122-18946122	606	624	+	9.42105	2.6e-05	0.103	ACACCATCACCCAGAGGTC
TAL1	hTFtarget	NW_012015244.1:18944122-18946122	712	723	-	12.75	2.6e-05	0.103	GCAGGAAAGAGT
BARX2	database	NW_012015244.1:18944122-18946122	341	350	-	12.0693	2.61e-05	0.0995	TTATTAATTA
HOXA4	database	NW_012015244.1:18944122-18946122	336	352	-	12.1149	2.61e-05	0.0948	AGTTATTAATTATTCCC
EZH2	hTFtarget	NW_012015244.1:18944122-18946122	849	870	+	11.314	2.61e-05	0.0336	TAAAAATGAAGAAATGTACAAA
TP53	hTFtarget	NW_012015244.1:18944122-18946122	397	408	-	11.876	2.61e-05	0.05	GAGAGAGGGAGG
CTCF	hTFtarget	NW_012015244.1:18944122-18946122	1939	1947	-	12.5395	2.61e-05	0.103	AGAACTGCA
BARX2	database	NW_012015244.1:18944122-18946122	341	350	-	12.0693	2.61e-05	0.0997	TTATTAATTA
ETV3	database	NW_012015244.1:18944122-18946122	486	495	+	12.5152	2.61e-05	0.103	ACTGGAAGTG
SPI1	hTFtarget	NW_012015244.1:18944122-18946122	1582	1593	+	12.1316	2.62e-05	0.104	TGTTCCACCCCC
AR	hTFtarget	NW_012015244.1:18944122-18946122	1572	1587	-	12.3788	2.62e-05	0.0337	GGAACAAGCAGGGCCT
IRF1	hTFtarget	NW_012015244.1:18944122-18946122	312	331	+	11.1972	2.63e-05	0.0949	GTAATAAAAACTGAAAAAAA
CREB1	hTFtarget	NW_012015244.1:18944122-18946122	1185	1196	+	12.5714	2.63e-05	0.104	ATGATATCATGA
E2F6	hTFtarget	NW_012015244.1:18944122-18946122	396	411	+	12.5429	2.63e-05	0.104	GCCTCCCTCTCTCTTC
RUNX1	database	NW_012015244.1:18944122-18946122	245	254	-	12.3293	2.64e-05	0.105	TTTGTGGTAA
FLI1	hTFtarget	NW_012015244.1:18944122-18946122	685	699	+	12.7273	2.64e-05	0.0523	CTTCCTTCCCTTCCC
BCL3	hTFtarget	NW_012015244.1:18944122-18946122	665	678	-	11.6316	2.64e-05	0.105	CAGGGTGGTTCCCA
SMAD1	hTFtarget	NW_012015244.1:18944122-18946122	686	699	-	12.2338	2.64e-05	0.0506	GGGAAGGGAAGGAA
RUNX1	database	NW_012015244.1:18944122-18946122	245	254	+	12.3265	2.64e-05	0.105	TTACCACAAA
FOXP3	database	NW_012015244.1:18944122-18946122	1217	1224	-	12.8429	2.65e-05	0.102	ATAAACAA
MYH11	hTFtarget	NW_012015244.1:18944122-18946122	1852	1867	+	11.1053	2.65e-05	0.105	AGCTGTGGCAGCAGGT
NFYB	hTFtarget	NW_012015244.1:18944122-18946122	330	345	+	6.10526	2.65e-05	0.1	AAATGAGGGAATAATT
NR3C1	hTFtarget	NW_012015244.1:18944122-18946122	936	949	+	12.3788	2.65e-05	0.0677	GCACACATTGTGCT
HLX	database	NW_012015244.1:18944122-18946122	1170	1177	-	9.83333	2.65e-05	0.095	CTAATAAA
NANOG	hTFtarget	NW_012015244.1:18944122-18946122	719	727	-	12.1	2.66e-05	0.0528	ACCAGCAGG
AR	hTFtarget	NW_012015244.1:18944122-18946122	1286	1297	+	12.3582	2.66e-05	0.0967	CTTATATAAACA
RARA	hTFtarget	NW_012015244.1:18944122-18946122	683	694	-	12.7143	2.66e-05	0.0829	GGGAAGGAAGTC
SREBF1	hTFtarget	NW_012015244.1:18944122-18946122	1408	1423	+	12.5526	2.66e-05	0.106	TTTGCGATTGGCAGCA
STAT3	hTFtarget	NW_012015244.1:18944122-18946122	743	758	+	12.2692	2.66e-05	0.0394	CACCAAAAAAAAAAAA
TFAP4	hTFtarget	NW_012015244.1:18944122-18946122	1288	1297	+	12.5974	2.66e-05	0.102	TATATAAACA
SP2	database	NW_012015244.1:18944122-18946122	1583	1597	+	12.2759	2.67e-05	0.105	GTTCCACCCCCCAGG
PGR	hTFtarget	NW_012015244.1:18944122-18946122	1971	1979	-	12.1053	2.67e-05	0.105	GTCAGGAAG
RUNX1	hTFtarget	NW_012015244.1:18944122-18946122	1970	1978	-	12.4848	2.67e-05	0.106	TCAGGAAGC
TBL1XR1	hTFtarget	NW_012015244.1:18944122-18946122	102	117	-	12.1316	2.67e-05	0.106	ACTGCCTCCCACAGAG
NKX6-1	database	NW_012015244.1:18944122-18946122	51	63	-	12.396	2.67e-05	0.0461	TATTTAATTTGAA
GATA3	hTFtarget	NW_012015244.1:18944122-18946122	1968	1979	-	12.7143	2.68e-05	0.0821	GTCAGGAAGCTC
GTF2I	hTFtarget	NW_012015244.1:18944122-18946122	1043	1058	-	11.8182	2.68e-05	0.0523	TGTGAATCTAGGCAAG
PIAS1	hTFtarget	NW_012015244.1:18944122-18946122	467	475	-	11.6528	2.68e-05	0.103	TGCAAACAG
SPI1	hTFtarget	NW_012015244.1:18944122-18946122	1583	1594	-	12.2632	2.68e-05	0.107	GGGGGGTGGAAC
MEIS1	database	NW_012015244.1:18944122-18946122	146	157	+	12.5408	2.69e-05	0.106	AAGTGACAGGTA
ESR1	hTFtarget	NW_012015244.1:18944122-18946122	1444	1452	+	12.5286	2.69e-05	0.107	GAGGGCAGA
HDAC3	hTFtarget	NW_012015244.1:18944122-18946122	938	949	-	12.7714	2.69e-05	0.106	AGCACAATGTGT
SPI1	hTFtarget	NW_012015244.1:18944122-18946122	137	151	-	11.4848	2.69e-05	0.0553	TCACTTCTGCTTCTC
AR	hTFtarget	NW_012015244.1:18944122-18946122	468	479	-	12.4722	2.7e-05	0.0997	CATGTGCAAACA
SPI1	hTFtarget	NW_012015244.1:18944122-18946122	1579	1594	-	12.4	2.7e-05	0.107	GGGGGGTGGAACAAGC
ZNF263	hTFtarget	NW_012015244.1:18944122-18946122	514	522	-	13.2286	2.7e-05	0.107	GCTGCTCCC
CTCF	hTFtarget	NW_012015244.1:18944122-18946122	604	625	-	11.2576	2.7e-05	0.106	AGACCTCTGGGTGATGGTGTAG
EP300	hTFtarget	NW_012015244.1:18944122-18946122	468	479	+	12.3194	2.7e-05	0.102	TGTTTGCACATG
TAL1	database	NW_012015244.1:18944122-18946122	84	108	+	9.42697	2.71e-05	0.0535	TCCAGCTGGTGAATGCTGCTCTGTG
IRF1	hTFtarget	NW_012015244.1:18944122-18946122	313	330	+	8.39394	2.71e-05	0.102	TAATAAAAACTGAAAAAA
SP1	hTFtarget	NW_012015244.1:18944122-18946122	1938	1953	-	9.82895	2.71e-05	0.0518	ATTTGAAGAACTGCAA
SPI1	hTFtarget	NW_012015244.1:18944122-18946122	1010	1025	-	12.2895	2.71e-05	0.0357	ACTCTACTTCACAGGG
SPI1	hTFtarget	NW_012015244.1:18944122-18946122	1583	1594	-	12.3816	2.71e-05	0.108	GGGGGGTGGAAC
T	hTFtarget	NW_012015244.1:18944122-18946122	1589	1597	-	12.8158	2.71e-05	0.0629	CCTGGGGGG
ZNF92	hTFtarget	NW_012015244.1:18944122-18946122	736	760	-	10.8056	2.71e-05	0.0223	TTTTTTTTTTTTTTGGTGGTGATTC
FOXP1	database	NW_012015244.1:18944122-18946122	747	766	-	-9.21429	2.72e-05	0.0508	GAATTTTTTTTTTTTTTTTT
GLI1	database	NW_012015244.1:18944122-18946122	740	749	+	12.6147	2.72e-05	0.0717	CACCACCAAA
STAT1	database	NW_012015244.1:18944122-18946122	720	741	-	12.3182	2.72e-05	0.0526	TGATTCTAGGAAGCACCAGCAG
MYC	hTFtarget	NW_012015244.1:18944122-18946122	201	209	-	11.9481	2.72e-05	0.0499	AAAGAAAGG
NCOR2	hTFtarget	NW_012015244.1:18944122-18946122	1953	1964	-	12.5857	2.72e-05	0.108	GACTTCCTTTTA
SPI1	hTFtarget	NW_012015244.1:18944122-18946122	1578	1593	+	12.2571	2.72e-05	0.108	TGCTTGTTCCACCCCC
NHLH1	database	NW_012015244.1:18944122-18946122	1855	1876	+	10.4868	2.73e-05	0.108	TGTGGCAGCAGGTGTGATTACT
NR3C1	hTFtarget	NW_012015244.1:18944122-18946122	934	949	-	12.2727	2.73e-05	0.0865	AGCACAATGTGTGCTC
SPI1	hTFtarget	NW_012015244.1:18944122-18946122	1583	1594	+	11.6316	2.73e-05	0.109	GTTCCACCCCCC
ENSG00000234254	database	NW_012015244.1:18944122-18946122	147	156	-	10.7431	2.73e-05	0.108	ACCTGTCACT
BARX2	hTFtarget	NW_012015244.1:18944122-18946122	1583	1594	-	12.6143	2.74e-05	0.109	GGGGGGTGGAAC
MYC	hTFtarget	NW_012015244.1:18944122-18946122	695	716	+	11.9912	2.74e-05	0.0573	TTCCCTGAATCTCTTTGACTCT
SIN3A	hTFtarget	NW_012015244.1:18944122-18946122	780	798	+	11.8158	2.74e-05	0.109	CTGTTTCTGAGGTAACCCA
CREB1	hTFtarget	NW_012015244.1:18944122-18946122	685	700	-	12	2.74e-05	0.0269	AGGGAAGGGAAGGAAG
STAT1	database	NW_012015244.1:18944122-18946122	694	703	-	12.3855	2.75e-05	0.0531	TTCAGGGAAG
KLF13	database	NW_012015244.1:18944122-18946122	394	406	-	12.5413	2.75e-05	0.109	GAGAGGGAGGCTG
IRF1	database	NW_012015244.1:18944122-18946122	317	330	-	12.378	2.75e-05	0.106	TTTTTTCAGTTTTT
ZNF350	database	NW_012015244.1:18944122-18946122	1893	1916	+	10.81	2.75e-05	0.108	GCAAAACAAACTCTTTAGGCCCTG
FOXA1	hTFtarget	NW_012015244.1:18944122-18946122	114	128	-	12.8485	2.76e-05	0.105	ACAATGTCAATACTG
SPI1	hTFtarget	NW_012015244.1:18944122-18946122	850	865	+	9.01515	2.76e-05	0.0358	AAAAATGAAGAAATGT
OSR2	database	NW_012015244.1:18944122-18946122	647	660	+	12.449	2.76e-05	0.108	GACTACAGTAGCTC
BCL6	hTFtarget	NW_012015244.1:18944122-18946122	1687	1698	+	12.2958	2.77e-05	0.105	TCTCTCTAGGAC
RB1	hTFtarget	NW_012015244.1:18944122-18946122	1583	1594	-	12.1184	2.77e-05	0.11	GGGGGGTGGAAC
SMAD1	hTFtarget	NW_012015244.1:18944122-18946122	913	921	-	12.8553	2.77e-05	0.11	TCCATTTCA
CEBPA	hTFtarget	NW_012015244.1:18944122-18946122	692	700	+	13.1579	2.77e-05	0.11	CCCTTCCCT
EBF1	hTFtarget	NW_012015244.1:18944122-18946122	572	583	-	12.3485	2.77e-05	0.0547	TGCCCAGGGGAT
EP300	hTFtarget	NW_012015244.1:18944122-18946122	226	234	-	12.8947	2.77e-05	0.105	AAATTCCAG
TBR1	database	NW_012015244.1:18944122-18946122	1863	1873	+	11.6735	2.77e-05	0.11	CAGGTGTGATT
FOXA1	hTFtarget	NW_012015244.1:18944122-18946122	936	951	+	12.1364	2.78e-05	0.109	GCACACATTGTGCTTG
RUNX1	hTFtarget	NW_012015244.1:18944122-18946122	682	693	-	12.5152	2.78e-05	0.0845	GGAAGGAAGTCA
STAT1	hTFtarget	NW_012015244.1:18944122-18946122	896	911	+	9.26316	2.78e-05	0.0536	AAGGGAAAAAAACCCC
POU4F1	database	NW_012015244.1:18944122-18946122	336	349	+	12.2126	2.78e-05	0.048	GGGAATAATTAATA
HNF4A	hTFtarget	NW_012015244.1:18944122-18946122	1020	1031	-	12.6184	2.79e-05	0.0545	CTCTGGACTCTA
ASCL2	hTFtarget	NW_012015244.1:18944122-18946122	368	379	+	12.5714	2.79e-05	0.107	TACCTGCCTTGC
SPI1	hTFtarget	NW_012015244.1:18944122-18946122	1580	1595	+	11.7368	2.79e-05	0.111	CTTGTTCCACCCCCCA
T	hTFtarget	NW_012015244.1:18944122-18946122	1921	1932	-	12.5429	2.79e-05	0.111	CCACCTGCAGAG
TRIM28	hTFtarget	NW_012015244.1:18944122-18946122	216	231	+	11.0263	2.79e-05	0.0648	AATAGAGTGACTGGAA
TAL1	database	NW_012015244.1:18944122-18946122	1807	1818	+	10.7753	2.8e-05	0.0556	TTACAGATGTTG
AR	hTFtarget	NW_012015244.1:18944122-18946122	934	949	-	12.1667	2.8e-05	0.0526	AGCACAATGTGTGCTC
ICE2	hTFtarget	NW_012015244.1:18944122-18946122	103	125	+	10.0921	2.8e-05	0.0554	TCTGTGGGAGGCAGTATTGACAT
NANOG	hTFtarget	NW_012015244.1:18944122-18946122	719	727	-	12.8143	2.8e-05	0.0552	ACCAGCAGG
SPI1	hTFtarget	NW_012015244.1:18944122-18946122	1583	1594	+	11.5395	2.8e-05	0.111	GTTCCACCCCCC
SPI1	hTFtarget	NW_012015244.1:18944122-18946122	1578	1593	+	11.9714	2.8e-05	0.111	TGCTTGTTCCACCCCC
HOXD8	database	NW_012015244.1:18944122-18946122	338	354	-	11.84	2.81e-05	0.0324	GAAGTTATTAATTATTC
GATA4	hTFtarget	NW_012015244.1:18944122-18946122	1921	1929	+	12.5395	2.81e-05	0.0558	CTCTGCAGG
IRF1	hTFtarget	NW_012015244.1:18944122-18946122	313	328	+	10.5909	2.81e-05	0.105	TAATAAAAACTGAAAA
SPI1	hTFtarget	NW_012015244.1:18944122-18946122	1582	1593	+	12.2895	2.81e-05	0.112	TGTTCCACCCCC
ZNF384	database	NW_012015244.1:18944122-18946122	899	910	+	12.8261	2.82e-05	0.109	GGAAAAAAACCC
ESR1	hTFtarget	NW_012015244.1:18944122-18946122	385	409	-	11.2985	2.82e-05	0.023	AGAGAGAGGGAGGCTGCTGAGAGGA
MAX	hTFtarget	NW_012015244.1:18944122-18946122	1583	1594	+	11.2237	2.82e-05	0.112	GTTCCACCCCCC
NANOG	hTFtarget	NW_012015244.1:18944122-18946122	719	727	-	12.5395	2.82e-05	0.112	ACCAGCAGG
SPI1	hTFtarget	NW_012015244.1:18944122-18946122	1579	1594	+	12.2714	2.82e-05	0.112	GCTTGTTCCACCCCCC
TCF12	hTFtarget	NW_012015244.1:18944122-18946122	466	477	+	12.7922	2.82e-05	0.103	TCTGTTTGCACA
ZNF350	database	NW_012015244.1:18944122-18946122	1893	1916	-	10.81	2.83e-05	0.111	CAGGGCCTAAAGAGTTTGTTTTGC
FOXA2	hTFtarget	NW_012015244.1:18944122-18946122	467	478	+	12.6667	2.83e-05	0.108	CTGTTTGCACAT
NR3C1	hTFtarget	NW_012015244.1:18944122-18946122	935	949	-	12.1515	2.83e-05	0.0553	AGCACAATGTGTGCT
ZBTB10	hTFtarget	NW_012015244.1:18944122-18946122	152	167	+	12.0526	2.83e-05	0.0378	CAGGTAGGGAGACAAA
BRD4	hTFtarget	NW_012015244.1:18944122-18946122	716	724	-	12.3289	2.84e-05	0.112	AGCAGGAAA
SPI1	hTFtarget	NW_012015244.1:18944122-18946122	1583	1594	-	12.1316	2.84e-05	0.113	GGGGGGTGGAAC
SPIC	database	NW_012015244.1:18944122-18946122	474	487	+	12.2424	2.84e-05	0.0546	CACATGAGGAAGAC
TBX22	database	NW_012015244.1:18944122-18946122	1817	1835	-	-6	2.85e-05	0.0621	AGGAGTAAAAATCGCACCA
FOXA2	hTFtarget	NW_012015244.1:18944122-18946122	467	478	-	12.6761	2.85e-05	0.109	ATGTGCAAACAG
POU5F1	hTFtarget	NW_012015244.1:18944122-18946122	685	700	-	12.2308	2.85e-05	0.106	AGGGAAGGGAAGGAAG
SMAD2/SMAD3	hTFtarget	NW_012015244.1:18944122-18946122	1066	1074	+	12.7368	2.85e-05	0.0376	CACAGCTGG
SPI1	hTFtarget	NW_012015244.1:18944122-18946122	682	696	+	11.3485	2.85e-05	0.0553	TGACTTCCTTCCCTT
SUMO2	hTFtarget	NW_012015244.1:18944122-18946122	696	717	-	10.8571	2.85e-05	0.0558	AAGAGTCAAAGAGATTCAGGGA
ZNF92	hTFtarget	NW_012015244.1:18944122-18946122	830	854	-	10.7083	2.85e-05	0.0223	TTTTTAATGTATTTGTTCAGGTTAA
CREB1	hTFtarget	NW_012015244.1:18944122-18946122	396	411	-	11.9453	2.85e-05	0.0269	GAAGAGAGAGGGAGGC
SMAD3	database	NW_012015244.1:18944122-18946122	1101	1110	+	11.7439	2.86e-05	0.0568	CAGTCTGGCT
SPI1	hTFtarget	NW_012015244.1:18944122-18946122	1583	1594	-	12.1053	2.86e-05	0.114	GGGGGGTGGAAC
SPI1	hTFtarget	NW_012015244.1:18944122-18946122	1583	1594	-	12.1316	2.86e-05	0.114	GGGGGGTGGAAC
YY1	hTFtarget	NW_012015244.1:18944122-18946122	1077	1088	-	11.8485	2.86e-05	0.114	GGCTCCATCTTT
SPI1	hTFtarget	NW_012015244.1:18944122-18946122	1953	1964	+	12.4545	2.87e-05	0.0915	TAAAAGGAAGTC
TBP	hTFtarget	NW_012015244.1:18944122-18946122	1285	1296	+	12.4156	2.87e-05	0.104	CCTTATATAAAC
ZNF384	database	NW_012015244.1:18944122-18946122	899	910	+	12.8218	2.87e-05	0.111	GGAAAAAAACCC
FOXP1	database	NW_012015244.1:18944122-18946122	735	754	-	-9.45238	2.88e-05	0.0508	TTTTTTTTGGTGGTGATTCT
PDX1	database	NW_012015244.1:18944122-18946122	62	71	-	12.6393	2.88e-05	0.107	CATTAATATA
SPI1	hTFtarget	NW_012015244.1:18944122-18946122	1951	1968	+	10.4242	2.88e-05	0.0459	AATAAAAGGAAGTCTAAG
ZNF143	hTFtarget	NW_012015244.1:18944122-18946122	747	767	+	12.0641	2.88e-05	0.0346	AAAAAAAAAAAAAAAAATTCC
AR	hTFtarget	NW_012015244.1:18944122-18946122	468	476	-	12.1944	2.88e-05	0.108	GTGCAAACA
FOXA1	hTFtarget	NW_012015244.1:18944122-18946122	117	128	+	12.806	2.89e-05	0.109	TATTGACATTGT
SPI1	hTFtarget	NW_012015244.1:18944122-18946122	1583	1594	+	12.1579	2.89e-05	0.115	GTTCCACCCCCC
HNF4G	database	NW_012015244.1:18944122-18946122	1508	1519	-	12.1633	2.89e-05	0.115	GTGCCCAGGCCA
ETS1	hTFtarget	NW_012015244.1:18944122-18946122	487	502	-	11.622	2.9e-05	0.115	CCCCTAGCACTTCCAG
ZBTB10	hTFtarget	NW_012015244.1:18944122-18946122	393	408	-	12.0132	2.9e-05	0.0378	GAGAGAGGGAGGCTGC
CDK9	hTFtarget	NW_012015244.1:18944122-18946122	746	761	+	12.359	2.9e-05	0.0273	CAAAAAAAAAAAAAAA
FOXP4	database	NW_012015244.1:18944122-18946122	742	756	+	12.8614	2.9e-05	0.00948	CCACCAAAAAAAAAA
LYL1	database	NW_012015244.1:18944122-18946122	84	108	-	9.43878	2.9e-05	0.057	CACAGAGCAGCATTCACCAGCTGGA
FOXA1	hTFtarget	NW_012015244.1:18944122-18946122	834	845	+	12.3611	2.91e-05	0.0438	CCTGAACAAATA
PAX5	hTFtarget	NW_012015244.1:18944122-18946122	312	327	-	12.1786	2.91e-05	0.0522	TTTCAGTTTTTATTAC
POLR2A	hTFtarget	NW_012015244.1:18944122-18946122	391	406	+	10.6184	2.91e-05	0.116	CAGCAGCCTCCCTCTC
SMAD3	hTFtarget	NW_012015244.1:18944122-18946122	1921	1929	-	13.0395	2.91e-05	0.0454	CCTGCAGAG
ESR1	hTFtarget	NW_012015244.1:18944122-18946122	411	426	-	8.47887	2.92e-05	0.0509	ACAGGCAGAGGGTAAG
MAFK	hTFtarget	NW_012015244.1:18944122-18946122	1852	1864	-	11.3333	2.92e-05	0.116	TGCTGCCACAGCT
RELA	hTFtarget	NW_012015244.1:18944122-18946122	316	327	-	12.6447	2.92e-05	0.0931	TTTCAGTTTTTA
SPI1	hTFtarget	NW_012015244.1:18944122-18946122	1579	1594	+	11.9429	2.92e-05	0.116	GCTTGTTCCACCCCCC
PRDM1	database	NW_012015244.1:18944122-18946122	399	413	-	11.9636	2.93e-05	0.11	AAGAAGAGAGAGGGA
GATA1	database	NW_012015244.1:18944122-18946122	607	616	-	9.67073	2.93e-05	0.117	GGTGATGGTG
EZH2	hTFtarget	NW_012015244.1:18944122-18946122	398	413	+	12.0909	2.93e-05	0.056	CTCCCTCTCTCTTCTT
FOXA2	hTFtarget	NW_012015244.1:18944122-18946122	467	478	+	12.6667	2.93e-05	0.109	CTGTTTGCACAT
AR	hTFtarget	NW_012015244.1:18944122-18946122	468	479	+	12.5556	2.93e-05	0.0679	TGTTTGCACATG
SP2	hTFtarget	NW_012015244.1:18944122-18946122	1583	1594	-	12.0526	2.93e-05	0.117	GGGGGGTGGAAC
CEBPA	hTFtarget	NW_012015244.1:18944122-18946122	713	723	-	12.7857	2.93e-05	0.116	GCAGGAAAGAG
HNF4G	database	NW_012015244.1:18944122-18946122	1508	1519	-	12.1376	2.94e-05	0.117	GTGCCCAGGCCA
AR	database	NW_012015244.1:18944122-18946122	935	949	-	12.1011	2.94e-05	0.111	AGCACAATGTGTGCT
SPI1	database	NW_012015244.1:18944122-18946122	478	485	+	12.8265	2.94e-05	0.0579	TGAGGAAG
SPI1	database	NW_012015244.1:18944122-18946122	1711	1718	+	12.8265	2.94e-05	0.0579	TGAGGAAG
AR	database	NW_012015244.1:18944122-18946122	935	949	-	12.2245	2.94e-05	0.117	AGCACAATGTGTGCT
SPI1	hTFtarget	NW_012015244.1:18944122-18946122	1580	1595	-	11.8553	2.94e-05	0.117	TGGGGGGTGGAACAAG
TP53	hTFtarget	NW_012015244.1:18944122-18946122	1109	1120	-	12.5128	2.94e-05	0.0557	CAGACAAAGGAG
EP300	hTFtarget	NW_012015244.1:18944122-18946122	226	234	-	12.8816	2.94e-05	0.102	AAATTCCAG
FOXA1	hTFtarget	NW_012015244.1:18944122-18946122	1286	1301	-	12.6061	2.95e-05	0.0637	CTCCTGTTTATATAAG
GTF3C2	hTFtarget	NW_012015244.1:18944122-18946122	739	763	+	7.31169	2.95e-05	0.0194	TCACCACCAAAAAAAAAAAAAAAAA
IRF1	hTFtarget	NW_012015244.1:18944122-18946122	318	333	+	12.2727	2.95e-05	0.0605	AAAACTGAAAAAAAAT
SPIB	hTFtarget	NW_012015244.1:18944122-18946122	1950	1967	+	9.77273	2.95e-05	0.0574	AAATAAAAGGAAGTCTAA
EOMES	hTFtarget	NW_012015244.1:18944122-18946122	1066	1074	+	12.6974	2.95e-05	0.0586	CACAGCTGG
SMAD3	database	NW_012015244.1:18944122-18946122	1101	1110	+	11.7347	2.95e-05	0.0586	CAGTCTGGCT
FLI1	hTFtarget	NW_012015244.1:18944122-18946122	675	699	-	4.30303	2.96e-05	0.0372	GGGAAGGGAAGGAAGTCAGTTCAGG
GATA2	hTFtarget	NW_012015244.1:18944122-18946122	716	724	+	12.4286	2.96e-05	0.0828	TTTCCTGCT
GATA2	hTFtarget	NW_012015244.1:18944122-18946122	716	724	+	12.4	2.96e-05	0.0705	TTTCCTGCT
PRDM1	hTFtarget	NW_012015244.1:18944122-18946122	399	413	-	12.0857	2.96e-05	0.114	AAGAAGAGAGAGGGA
SMAD4	hTFtarget	NW_012015244.1:18944122-18946122	224	232	-	12.3253	2.96e-05	0.11	ATTCCAGTC
AR	hTFtarget	NW_012015244.1:18944122-18946122	1286	1297	+	12.8701	2.96e-05	0.111	CTTATATAAACA
ERG	hTFtarget	NW_012015244.1:18944122-18946122	467	477	+	12.4675	2.97e-05	0.115	CTGTTTGCACA
PRDM1	hTFtarget	NW_012015244.1:18944122-18946122	399	412	-	12.1143	2.98e-05	0.114	AGAAGAGAGAGGGA
TP53	hTFtarget	NW_012015244.1:18944122-18946122	1098	1119	-	5.59211	2.98e-05	0.114	AGACAAAGGAGCCAGACTGAGT
TTF2	hTFtarget	NW_012015244.1:18944122-18946122	1911	1919	+	12.3421	2.98e-05	0.119	GCCCTGGGG
SREBF1	database	NW_012015244.1:18944122-18946122	628	638	+	11.8807	2.99e-05	0.119	AGTGAGCTGAG
IRF1	hTFtarget	NW_012015244.1:18944122-18946122	313	328	+	9.32394	2.99e-05	0.113	TAATAAAAACTGAAAA
SMAD3	hTFtarget	NW_012015244.1:18944122-18946122	719	727	-	12.4211	2.99e-05	0.0594	ACCAGCAGG
USF2	hTFtarget	NW_012015244.1:18944122-18946122	1583	1594	-	11.8286	2.99e-05	0.119	GGGGGGTGGAAC
NKX3-1	database	NW_012015244.1:18944122-18946122	56	68	+	12.1957	3e-05	0.107	ATTAAATATATTA
FOXA2	hTFtarget	NW_012015244.1:18944122-18946122	468	479	+	12.697	3e-05	0.103	TGTTTGCACATG
GATA4	hTFtarget	NW_012015244.1:18944122-18946122	1288	1297	+	12.6234	3e-05	0.107	TATATAAACA
RELA	hTFtarget	NW_012015244.1:18944122-18946122	903	911	+	12.6883	3e-05	0.0645	AAAAACCCC
SPI1	hTFtarget	NW_012015244.1:18944122-18946122	1578	1599	-	9.51429	3e-05	0.119	GGCCTGGGGGGTGGAACAAGCA
SPI1	hTFtarget	NW_012015244.1:18944122-18946122	1577	1598	-	11.1714	3e-05	0.119	GCCTGGGGGGTGGAACAAGCAG
SRF	hTFtarget	NW_012015244.1:18944122-18946122	1007	1031	-	11.6265	3e-05	0.0592	CTCTGGACTCTACTTCACAGGGTTC
ZNF143	hTFtarget	NW_012015244.1:18944122-18946122	736	760	-	11.9744	3e-05	0.0214	TTTTTTTTTTTTTTGGTGGTGATTC
FERD3L	database	NW_012015244.1:18944122-18946122	917	937	-	11.1122	3e-05	0.0593	GCTCATCATTTTTATTTCCAT
PBX3	database	NW_012015244.1:18944122-18946122	1409	1422	-	12.398	3e-05	0.119	GCTGCCAATCGCAA
TCF4	database	NW_012015244.1:18944122-18946122	1862	1870	+	13.6818	3.01e-05	0.12	GCAGGTGTG
PBX3	database	NW_012015244.1:18944122-18946122	1409	1422	+	12.431	3.01e-05	0.119	TTGCGATTGGCAGC
FLI1	hTFtarget	NW_012015244.1:18944122-18946122	685	700	-	11.5586	3.01e-05	0.037	AGGGAAGGGAAGGAAG
SREBF1	database	NW_012015244.1:18944122-18946122	628	638	+	11.8349	3.01e-05	0.12	AGTGAGCTGAG
TCF4	database	NW_012015244.1:18944122-18946122	1862	1870	+	13.6327	3.01e-05	0.119	GCAGGTGTG
GLI1	database	NW_012015244.1:18944122-18946122	1586	1597	-	12.2551	3.02e-05	0.12	CCTGGGGGGTGG
AR	hTFtarget	NW_012015244.1:18944122-18946122	1572	1587	+	12.2857	3.02e-05	0.0395	AGGCCCTGCTTGTTCC
FOXA1	hTFtarget	NW_012015244.1:18944122-18946122	1286	1301	-	12.7164	3.02e-05	0.0625	CTCCTGTTTATATAAG
IRF4	hTFtarget	NW_012015244.1:18944122-18946122	313	328	-	11.7632	3.02e-05	0.0573	TTTTCAGTTTTTATTA
NR3C1	hTFtarget	NW_012015244.1:18944122-18946122	935	950	+	12.0571	3.02e-05	0.0579	AGCACACATTGTGCTT
SPI1	hTFtarget	NW_012015244.1:18944122-18946122	605	629	-	11.3289	3.02e-05	0.0597	CTATAGACCTCTGGGTGATGGTGTA
CBX3	hTFtarget	NW_012015244.1:18944122-18946122	1640	1648	+	11.3947	3.02e-05	0.12	CAGCCAGGC
NKX2-3	database	NW_012015244.1:18944122-18946122	56	68	+	12.1584	3.02e-05	0.106	ATTAAATATATTA
SPI1	hTFtarget	NW_012015244.1:18944122-18946122	1583	1594	-	12.1429	3.03e-05	0.121	GGGGGGTGGAAC
ZNF143	hTFtarget	NW_012015244.1:18944122-18946122	1006	1026	+	5.40909	3.03e-05	0.12	AGAACCCTGTGAAGTAGAGTC
SMARCA4	hTFtarget	NW_012015244.1:18944122-18946122	749	764	+	12.1806	3.04e-05	0.0214	AAAAAAAAAAAAAAAT
SPI1	hTFtarget	NW_012015244.1:18944122-18946122	1583	1594	-	11.6447	3.04e-05	0.121	GGGGGGTGGAAC
MEIS1	database	NW_012015244.1:18944122-18946122	1458	1470	-	12.2	3.05e-05	0.12	TGATAGCTTTAAA
SPI1	hTFtarget	NW_012015244.1:18944122-18946122	850	865	+	7.77273	3.05e-05	0.0396	AAAAATGAAGAAATGT
EP300	hTFtarget	NW_012015244.1:18944122-18946122	1954	1962	+	11.9857	3.05e-05	0.0607	AAAAGGAAG
ESR1	hTFtarget	NW_012015244.1:18944122-18946122	684	708	-	11.1493	3.06e-05	0.023	AGAGATTCAGGGAAGGGAAGGAAGT
MED1	hTFtarget	NW_012015244.1:18944122-18946122	749	764	-	12.1818	3.06e-05	0.0288	ATTTTTTTTTTTTTTT
AR	hTFtarget	NW_012015244.1:18944122-18946122	935	950	+	12.1711	3.07e-05	0.0567	AGCACACATTGTGCTT
AR	hTFtarget	NW_012015244.1:18944122-18946122	934	949	+	12.0429	3.07e-05	0.0605	GAGCACACATTGTGCT
FOXA1	hTFtarget	NW_012015244.1:18944122-18946122	1286	1297	-	12.7164	3.07e-05	0.0886	TGTTTATATAAG
FOXA2	hTFtarget	NW_012015244.1:18944122-18946122	389	397	+	12.7632	3.07e-05	0.0606	CTCAGCAGC
PPARD/PPARG	hTFtarget	NW_012015244.1:18944122-18946122	915	923	-	12.4605	3.07e-05	0.118	TTTCCATTT
ZNF143	hTFtarget	NW_012015244.1:18944122-18946122	744	764	+	11.9872	3.07e-05	0.0346	ACCAAAAAAAAAAAAAAAAAT
AR	hTFtarget	NW_012015244.1:18944122-18946122	468	478	-	12.6494	3.07e-05	0.111	ATGTGCAAACA
MEIS1	database	NW_012015244.1:18944122-18946122	1458	1470	+	12.1735	3.07e-05	0.121	TTTAAAGCTATCA
ZEB1	database	NW_012015244.1:18944122-18946122	1863	1871	-	13.1091	3.08e-05	0.122	TCACACCTG
BRD4	hTFtarget	NW_012015244.1:18944122-18946122	911	922	+	12.3766	3.08e-05	0.118	CATGAAATGGAA
ZNF274	hTFtarget	NW_012015244.1:18944122-18946122	1802	1817	-	10.5429	3.08e-05	0.116	AACATCTGTAAATCCA
FOXA1	hTFtarget	NW_012015244.1:18944122-18946122	466	479	-	12.6061	3.09e-05	0.103	CATGTGCAAACAGA
KLF4	hTFtarget	NW_012015244.1:18944122-18946122	667	681	-	12.4848	3.09e-05	0.123	GTTCAGGGTGGTTCC
SPI1	hTFtarget	NW_012015244.1:18944122-18946122	606	621	+	11.8816	3.09e-05	0.068	ACACCATCACCCAGAG
SPI1	hTFtarget	NW_012015244.1:18944122-18946122	1583	1594	-	12.0857	3.09e-05	0.122	GGGGGGTGGAAC
SPI1	hTFtarget	NW_012015244.1:18944122-18946122	1583	1594	-	11.9211	3.09e-05	0.123	GGGGGGTGGAAC
TAF1	hTFtarget	NW_012015244.1:18944122-18946122	1077	1088	+	11.7632	3.09e-05	0.12	AAAGATGGAGCC
FOXA2	hTFtarget	NW_012015244.1:18944122-18946122	1286	1301	+	12.6197	3.1e-05	0.116	CTTATATAAACAGGAG
NANOG	hTFtarget	NW_012015244.1:18944122-18946122	1066	1074	+	12.6974	3.1e-05	0.0615	CACAGCTGG
ZNF92	hTFtarget	NW_012015244.1:18944122-18946122	739	763	-	10.5417	3.1e-05	0.0223	TTTTTTTTTTTTTTTTTGGTGGTGA
AR	hTFtarget	NW_012015244.1:18944122-18946122	936	949	+	12.1143	3.1e-05	0.0601	GCACACATTGTGCT
JUND	database	NW_012015244.1:18944122-18946122	1181	1195	+	12.4043	3.11e-05	0.0764	TGGCATGATATCATG
FLI1	hTFtarget	NW_012015244.1:18944122-18946122	685	700	+	12.4848	3.11e-05	0.0615	CTTCCTTCCCTTCCCT
BCL6	hTFtarget	NW_012015244.1:18944122-18946122	1687	1698	-	12.1127	3.11e-05	0.12	GTCCTAGAGAGA
FOXA1	hTFtarget	NW_012015244.1:18944122-18946122	468	476	-	12.3247	3.12e-05	0.118	GTGCAAACA
KLF4	hTFtarget	NW_012015244.1:18944122-18946122	511	522	+	11.5	3.12e-05	0.0653	CCTGGGAGCAGC
NR3C1	hTFtarget	NW_012015244.1:18944122-18946122	934	949	-	12.0758	3.12e-05	0.0589	AGCACAATGTGTGCTC
SETDB1	hTFtarget	NW_012015244.1:18944122-18946122	160	171	-	12.3553	3.12e-05	0.122	AGGGTTTGTCTC
C17orf96	hTFtarget	NW_012015244.1:18944122-18946122	402	426	-	11.9241	3.12e-05	0.0308	ACAGGCAGAGGGTAAGAAGAGAGAG
STAT3	hTFtarget	NW_012015244.1:18944122-18946122	146	161	+	11.9059	3.12e-05	0.105	AAGTGACAGGTAGGGA
TFAP2C	hTFtarget	NW_012015244.1:18944122-18946122	1589	1600	+	12.3788	3.12e-05	0.124	CCCCCCAGGCCT
GATA5	database	NW_012015244.1:18944122-18946122	550	566	+	12.1837	3.12e-05	0.114	AGATAGATATCCCAACT
GATA5	database	NW_012015244.1:18944122-18946122	550	566	+	12.1633	3.13e-05	0.113	AGATAGATATCCCAACT
FOXA1	hTFtarget	NW_012015244.1:18944122-18946122	1285	1300	-	12.5455	3.13e-05	0.11	TCCTGTTTATATAAGG
ASCL1	hTFtarget	NW_012015244.1:18944122-18946122	1923	1931	+	13.0152	3.13e-05	0.0619	CTGCAGGTG
TAF1	hTFtarget	NW_012015244.1:18944122-18946122	1077	1088	+	11.1579	3.13e-05	0.123	AAAGATGGAGCC
CTCF	hTFtarget	NW_012015244.1:18944122-18946122	1938	1947	-	12.2105	3.13e-05	0.122	AGAACTGCAA
SPI1	hTFtarget	NW_012015244.1:18944122-18946122	1583	1594	-	12	3.14e-05	0.125	GGGGGGTGGAAC
ETV1	hTFtarget	NW_012015244.1:18944122-18946122	1969	1980	+	12.4394	3.15e-05	0.125	AGCTTCCTGACT
FOXA1	hTFtarget	NW_012015244.1:18944122-18946122	468	478	-	12.3056	3.15e-05	0.119	ATGTGCAAACA
STAT3	hTFtarget	NW_012015244.1:18944122-18946122	876	889	+	12.3239	3.15e-05	0.124	CTTCTTGTAAATCA
TP53	hTFtarget	NW_012015244.1:18944122-18946122	1878	1893	-	11.2078	3.15e-05	0.0299	CACCTTCGCTCTTCTG
TBX22	database	NW_012015244.1:18944122-18946122	1817	1835	+	-6.36735	3.16e-05	0.0621	TGGTGCGATTTTTACTCCT
SOX2	hTFtarget	NW_012015244.1:18944122-18946122	719	727	+	12.5132	3.16e-05	0.068	CCTGCTGGT
T	hTFtarget	NW_012015244.1:18944122-18946122	1913	1921	+	12.6447	3.16e-05	0.0629	CCTGGGGAC
TP53	hTFtarget	NW_012015244.1:18944122-18946122	1065	1080	-	11.9643	3.16e-05	0.122	CTTTTACCAGCTGTGT
GATA3	hTFtarget	NW_012015244.1:18944122-18946122	467	477	-	12.7013	3.17e-05	0.0954	TGTGCAAACAG
DUXA	database	NW_012015244.1:18944122-18946122	1868	1880	-	12.4	3.17e-05	0.123	CTGAAGTAATCAC
PAX5	database	NW_012015244.1:18944122-18946122	1637	1644	-	12.1207	3.18e-05	0.127	GGCTGAGT
TCF12	database	NW_012015244.1:18944122-18946122	86	93	-	14.1463	3.18e-05	0.0582	ACCAGCTG
TCF12	database	NW_012015244.1:18944122-18946122	1068	1075	-	14.1463	3.18e-05	0.0582	ACCAGCTG
EZH2	hTFtarget	NW_012015244.1:18944122-18946122	311	332	+	11.1279	3.18e-05	0.0336	TGTAATAAAAACTGAAAAAAAA
GABPA	hTFtarget	NW_012015244.1:18944122-18946122	688	703	-	12	3.18e-05	0.126	TTCAGGGAAGGGAAGG
ASCL1	hTFtarget	NW_012015244.1:18944122-18946122	1861	1868	+	13.4091	3.18e-05	0.111	AGCAGGTG
HOXA9	hTFtarget	NW_012015244.1:18944122-18946122	684	692	+	12.9079	3.18e-05	0.0623	ACTTCCTTC
SMAD3	hTFtarget	NW_012015244.1:18944122-18946122	719	727	+	12.8947	3.18e-05	0.0454	CCTGCTGGT
SPI1	hTFtarget	NW_012015244.1:18944122-18946122	1583	1594	-	11.8026	3.18e-05	0.126	GGGGGGTGGAAC
SPI1	hTFtarget	NW_012015244.1:18944122-18946122	1581	1599	+	11.2286	3.18e-05	0.126	TTGTTCCACCCCCCAGGCC
TP53	hTFtarget	NW_012015244.1:18944122-18946122	150	165	+	11.8676	3.18e-05	0.0401	GACAGGTAGGGAGACA
PAX5	database	NW_012015244.1:18944122-18946122	1637	1644	+	12.0918	3.18e-05	0.127	ACTCAGCC
PTF1A	database	NW_012015244.1:18944122-18946122	917	937	+	11.0734	3.19e-05	0.063	ATGGAAATAAAAATGATGAGC
STAT5A	database	NW_012015244.1:18944122-18946122	729	740	-	12.3521	3.19e-05	0.123	GATTCTAGGAAG
STAT3	database	NW_012015244.1:18944122-18946122	725	740	-	12.1837	3.19e-05	0.126	GATTCTAGGAAGCACC
HCFC1	hTFtarget	NW_012015244.1:18944122-18946122	606	621	-	8.85714	3.19e-05	0.126	CTCTGGGTGATGGTGT
POU2F2	hTFtarget	NW_012015244.1:18944122-18946122	1626	1637	+	12.3429	3.19e-05	0.115	TCATGCAAAGCA
PRKDC	hTFtarget	NW_012015244.1:18944122-18946122	1579	1594	+	11.6842	3.19e-05	0.127	GCTTGTTCCACCCCCC
ZNF274	hTFtarget	NW_012015244.1:18944122-18946122	1334	1349	-	12	3.19e-05	0.125	GACATCCATTTAAAGG
EP300	hTFtarget	NW_012015244.1:18944122-18946122	316	327	+	12.3247	3.19e-05	0.106	TAAAAACTGAAA
ERG	hTFtarget	NW_012015244.1:18944122-18946122	1971	1982	+	12.5921	3.19e-05	0.09	CTTCCTGACTCT
SMAD1	database	NW_012015244.1:18944122-18946122	1500	1511	+	12.1802	3.2e-05	0.0625	TCCCTGTGTGGC
FLI1	hTFtarget	NW_012015244.1:18944122-18946122	685	700	+	11.8553	3.2e-05	0.0494	CTTCCTTCCCTTCCCT
MYC	hTFtarget	NW_012015244.1:18944122-18946122	138	153	+	12.0658	3.2e-05	0.121	AGAAGCAGAAGTGACA
C17orf96	hTFtarget	NW_012015244.1:18944122-18946122	690	714	-	11.8861	3.2e-05	0.0308	AGTCAAAGAGATTCAGGGAAGGGAA
SPI1	hTFtarget	NW_012015244.1:18944122-18946122	136	151	-	11.3788	3.2e-05	0.0596	TCACTTCTGCTTCTCT
NCOR1	hTFtarget	NW_012015244.1:18944122-18946122	1970	1981	-	12.4286	3.21e-05	0.0509	GAGTCAGGAAGC
STAT5A	database	NW_012015244.1:18944122-18946122	729	740	+	12.3232	3.21e-05	0.125	CTTCCTAGAATC
IRX4	database	NW_012015244.1:18944122-18946122	806	822	+	11.6964	3.22e-05	0.115	TTTCTATATGTAAAATA
TCF12	hTFtarget	NW_012015244.1:18944122-18946122	468	478	-	12.2778	3.22e-05	0.122	ATGTGCAAACA
SMAD1	database	NW_012015244.1:18944122-18946122	1500	1511	+	12.1717	3.22e-05	0.063	TCCCTGTGTGGC
IRF7	database	NW_012015244.1:18944122-18946122	318	327	+	12.337	3.23e-05	0.109	AAAACTGAAA
TBP	database	NW_012015244.1:18944122-18946122	6	13	+	12	3.23e-05	0.116	TATAAATA
SPI1	database	NW_012015244.1:18944122-18946122	1952	1970	-	12.2697	3.23e-05	0.061	CTCTTAGACTTCCTTTTAT
AR	hTFtarget	NW_012015244.1:18944122-18946122	1572	1587	+	12.1857	3.23e-05	0.0416	AGGCCCTGCTTGTTCC
FOXA1	hTFtarget	NW_012015244.1:18944122-18946122	113	128	+	12.6269	3.23e-05	0.0625	GCAGTATTGACATTGT
HDAC1	hTFtarget	NW_012015244.1:18944122-18946122	1953	1964	-	12.4857	3.23e-05	0.0698	GACTTCCTTTTA
KDM5B	hTFtarget	NW_012015244.1:18944122-18946122	1507	1518	+	12.2105	3.23e-05	0.129	GTGGCCTGGGCA
RARA	hTFtarget	NW_012015244.1:18944122-18946122	682	695	-	12.2286	3.23e-05	0.0889	AGGGAAGGAAGTCA
RXRA	hTFtarget	NW_012015244.1:18944122-18946122	468	478	+	12.2987	3.23e-05	0.122	TGTTTGCACAT
SPI1	hTFtarget	NW_012015244.1:18944122-18946122	1583	1594	-	12.0526	3.23e-05	0.129	GGGGGGTGGAAC
STAT6	hTFtarget	NW_012015244.1:18944122-18946122	781	796	+	12.338	3.23e-05	0.118	TGTTTCTGAGGTAACC
AR	hTFtarget	NW_012015244.1:18944122-18946122	180	195	+	12.1795	3.23e-05	0.126	CTGAGTACCTGTCTCT
CPEB1	database	NW_012015244.1:18944122-18946122	314	321	-	12.505	3.23e-05	0.0584	TTTTTATT
CPEB1	database	NW_012015244.1:18944122-18946122	922	929	-	12.505	3.23e-05	0.0584	TTTTTATT
IRF7	database	NW_012015244.1:18944122-18946122	318	327	+	12.3168	3.23e-05	0.108	AAAACTGAAA
FLI1	hTFtarget	NW_012015244.1:18944122-18946122	683	698	-	0.442857	3.24e-05	0.0618	GGAAGGGAAGGAAGTC
SPI1	hTFtarget	NW_012015244.1:18944122-18946122	1579	1594	+	11.7368	3.24e-05	0.129	GCTTGTTCCACCCCCC
HMGA1	database	NW_012015244.1:18944122-18946122	756	770	-	10.8824	3.25e-05	0.117	CAAGGAATTTTTTTT
FLI1	hTFtarget	NW_012015244.1:18944122-18946122	684	699	-	11.7015	3.25e-05	0.0614	GGGAAGGGAAGGAAGT
PIAS1	hTFtarget	NW_012015244.1:18944122-18946122	934	949	-	12.0758	3.25e-05	0.0609	AGCACAATGTGTGCTC
CBX3	hTFtarget	NW_012015244.1:18944122-18946122	1176	1191	+	11.0658	3.25e-05	0.128	AGTAATGGCATGATAT
CHD7	hTFtarget	NW_012015244.1:18944122-18946122	909	924	+	12.039	3.25e-05	0.113	CCCATGAAATGGAAAT
GLI1	database	NW_012015244.1:18944122-18946122	1502	1512	-	11.6788	3.26e-05	0.13	GGCCACACAGG
EWSR1	hTFtarget	NW_012015244.1:18944122-18946122	684	699	-	-5.1	3.26e-05	0.0421	GGGAAGGGAAGGAAGT
RUNX1	hTFtarget	NW_012015244.1:18944122-18946122	416	427	-	12.25	3.26e-05	0.128	CACAGGCAGAGG
SMAD1	hTFtarget	NW_012015244.1:18944122-18946122	224	232	-	12.8289	3.26e-05	0.127	ATTCCAGTC
FOXP4	database	NW_012015244.1:18944122-18946122	751	765	+	12.7426	3.26e-05	0.00975	AAAAAAAAAAAAATT
HLTF	database	NW_012015244.1:18944122-18946122	1554	1565	-	12.1982	3.27e-05	0.0665	TAGGGCTGCAAG
HNF1A	database	NW_012015244.1:18944122-18946122	342	352	-	11.8831	3.27e-05	0.117	AGTTATTAATT
ESR1	hTFtarget	NW_012015244.1:18944122-18946122	399	407	-	12.3239	3.27e-05	0.0641	AGAGAGGGA
FOXA1	hTFtarget	NW_012015244.1:18944122-18946122	464	479	+	12.4697	3.27e-05	0.0637	TTTCTGTTTGCACATG
FOXP1	hTFtarget	NW_012015244.1:18944122-18946122	402	413	-	12.2632	3.27e-05	0.0764	AAGAAGAGAGAG
ZNF274	database	NW_012015244.1:18944122-18946122	1745	1759	-	8.59184	3.27e-05	0.128	TCATAGAAGAAAAAA
ELF5	database	NW_012015244.1:18944122-18946122	306	314	-	11.236	3.28e-05	0.13	TACATCCTT
FOXA1	hTFtarget	NW_012015244.1:18944122-18946122	465	479	+	12.5758	3.28e-05	0.0869	TTCTGTTTGCACATG
PML	hTFtarget	NW_012015244.1:18944122-18946122	1710	1718	-	12.0857	3.28e-05	0.0792	CTTCCTCAC
SPI1	hTFtarget	NW_012015244.1:18944122-18946122	1938	1953	+	10.5455	3.28e-05	0.064	TTGCAGTTCTTCAAAT
STAT5B	hTFtarget	NW_012015244.1:18944122-18946122	728	743	+	12.4848	3.28e-05	0.0634	GCTTCCTAGAATCACC
TFAP2A	hTFtarget	NW_012015244.1:18944122-18946122	1585	1600	+	12.3182	3.28e-05	0.129	TCCACCCCCCAGGCCT
TP53	hTFtarget	NW_012015244.1:18944122-18946122	767	788	-	-4.26389	3.28e-05	0.0665	CAGAAACAGAGCTTGAGACAAG
TRIM28	hTFtarget	NW_012015244.1:18944122-18946122	559	574	-	10.6842	3.28e-05	0.0648	GATGAAGAAGTTGGGA
ZNF384	hTFtarget	NW_012015244.1:18944122-18946122	896	917	-	5.61111	3.28e-05	0.011	TTTCATGGGGTTTTTTTCCCTT
AR	hTFtarget	NW_012015244.1:18944122-18946122	467	478	+	12.3611	3.28e-05	0.0987	CTGTTTGCACAT
VDR	database	NW_012015244.1:18944122-18946122	403	417	-	12.2455	3.29e-05	0.13	GGGTAAGAAGAGAGA
FOXA1	hTFtarget	NW_012015244.1:18944122-18946122	1286	1297	+	11.7612	3.29e-05	0.119	CTTATATAAACA
KLF4	hTFtarget	NW_012015244.1:18944122-18946122	1591	1602	+	11.4211	3.29e-05	0.0653	CCCCAGGCCTGA
PBX3	hTFtarget	NW_012015244.1:18944122-18946122	1583	1594	-	11.4714	3.29e-05	0.131	GGGGGGTGGAAC
PRKDC	hTFtarget	NW_012015244.1:18944122-18946122	1583	1594	-	12	3.29e-05	0.131	GGGGGGTGGAAC
SPI1	hTFtarget	NW_012015244.1:18944122-18946122	1583	1594	-	11.8286	3.29e-05	0.131	GGGGGGTGGAAC
EP300	hTFtarget	NW_012015244.1:18944122-18946122	468	479	-	12.4028	3.29e-05	0.122	CATGTGCAAACA
AR	database	NW_012015244.1:18944122-18946122	929	955	+	7.40244	3.3e-05	0.0908	ATGATGAGCACACATTGTGCTTGCTAT
CART1	database	NW_012015244.1:18944122-18946122	336	352	+	11.9191	3.3e-05	0.122	GGGAATAATTAATAACT
ESR1	hTFtarget	NW_012015244.1:18944122-18946122	406	427	-	0.267606	3.3e-05	0.128	CACAGGCAGAGGGTAAGAAGAG
GATA2	hTFtarget	NW_012015244.1:18944122-18946122	477	485	+	12	3.3e-05	0.0688	ATGAGGAAG
NR3C1	hTFtarget	NW_012015244.1:18944122-18946122	935	948	+	12.0455	3.3e-05	0.0687	AGCACACATTGTGC
POLR3A	hTFtarget	NW_012015244.1:18944122-18946122	315	330	+	12.1795	3.3e-05	0.0128	ATAAAAACTGAAAAAA
SPI1	hTFtarget	NW_012015244.1:18944122-18946122	1583	1594	-	11.9571	3.3e-05	0.131	GGGGGGTGGAAC
HLTF	database	NW_012015244.1:18944122-18946122	1554	1565	-	12.2323	3.3e-05	0.066	TAGGGCTGCAAG
FOXA1	hTFtarget	NW_012015244.1:18944122-18946122	114	129	+	12.4697	3.31e-05	0.108	CAGTATTGACATTGTC
ASCL1	hTFtarget	NW_012015244.1:18944122-18946122	1860	1871	+	12.7727	3.31e-05	0.131	CAGCAGGTGTGA
SPI1	hTFtarget	NW_012015244.1:18944122-18946122	1578	1602	+	9.08571	3.31e-05	0.131	TGCTTGTTCCACCCCCCAGGCCTGA
SPI1	hTFtarget	NW_012015244.1:18944122-18946122	1579	1594	+	10.9571	3.31e-05	0.131	GCTTGTTCCACCCCCC
HIRA	hTFtarget	NW_012015244.1:18944122-18946122	898	909	-	12.2237	3.32e-05	0.0644	GGTTTTTTTCCC
MYC	hTFtarget	NW_012015244.1:18944122-18946122	693	714	-	6.01316	3.32e-05	0.0325	AGTCAAAGAGATTCAGGGAAGG
SMAD3	hTFtarget	NW_012015244.1:18944122-18946122	1066	1074	+	12.2571	3.32e-05	0.0571	CACAGCTGG
HLTF	database	NW_012015244.1:18944122-18946122	1415	1426	-	12.2222	3.32e-05	0.066	TGTTGCTGCCAA
FOXA2	hTFtarget	NW_012015244.1:18944122-18946122	468	478	+	12.4545	3.33e-05	0.127	TGTTTGCACAT
NANOG	hTFtarget	NW_012015244.1:18944122-18946122	1110	1118	-	12.3421	3.33e-05	0.128	GACAAAGGA
YY1	hTFtarget	NW_012015244.1:18944122-18946122	1078	1086	+	11.8816	3.33e-05	0.13	AAGATGGAG
ZFX	hTFtarget	NW_012015244.1:18944122-18946122	1593	1601	-	13.0143	3.33e-05	0.133	CAGGCCTGG
NR2F2	hTFtarget	NW_012015244.1:18944122-18946122	468	478	-	12.6883	3.34e-05	0.122	ATGTGCAAACA
RELA	hTFtarget	NW_012015244.1:18944122-18946122	1928	1936	-	12.6104	3.34e-05	0.0645	GAAACCACC
TCF12	hTFtarget	NW_012015244.1:18944122-18946122	1924	1932	-	12.4394	3.34e-05	0.0663	CCACCTGCA
CIITA	hTFtarget	NW_012015244.1:18944122-18946122	1077	1088	+	11.8714	3.34e-05	0.133	AAAGATGGAGCC
HLTF	database	NW_012015244.1:18944122-18946122	1415	1426	-	12.1802	3.35e-05	0.0665	TGTTGCTGCCAA
NR3C1	database	NW_012015244.1:18944122-18946122	934	949	-	10.1284	3.35e-05	0.131	AGCACAATGTGTGCTC
FOXA1	hTFtarget	NW_012015244.1:18944122-18946122	117	128	-	12.6515	3.35e-05	0.123	ACAATGTCAATA
FOXA2	hTFtarget	NW_012015244.1:18944122-18946122	931	942	+	12.4545	3.35e-05	0.0507	GATGAGCACACA
PBX1	hTFtarget	NW_012015244.1:18944122-18946122	1412	1422	+	12.6	3.35e-05	0.133	CGATTGGCAGC
T	hTFtarget	NW_012015244.1:18944122-18946122	101	115	+	12.1364	3.35e-05	0.0769	GCTCTGTGGGAGGCA
TP53	hTFtarget	NW_012015244.1:18944122-18946122	1878	1893	+	10.6316	3.35e-05	0.0428	CAGAAGAGCGAAGGTG
BCL11A	hTFtarget	NW_012015244.1:18944122-18946122	1918	1929	-	12.3857	3.36e-05	0.0974	CCTGCAGAGTCC
MXI1	hTFtarget	NW_012015244.1:18944122-18946122	780	795	-	11.0132	3.37e-05	0.0875	GTTACCTCAGAAACAG
SPI1	hTFtarget	NW_012015244.1:18944122-18946122	1579	1594	+	11.7143	3.37e-05	0.133	GCTTGTTCCACCCCCC
TP53	hTFtarget	NW_012015244.1:18944122-18946122	1523	1545	+	9.07792	3.37e-05	0.0467	CTTGCAGGTAAAGAATAGAGATC
BCL11A	hTFtarget	NW_012015244.1:18944122-18946122	1066	1074	+	12.6286	3.38e-05	0.0585	CACAGCTGG
POLR2A	hTFtarget	NW_012015244.1:18944122-18946122	1850	1865	-	10.5263	3.38e-05	0.134	CTGCTGCCACAGCTTC
SPI1	hTFtarget	NW_012015244.1:18944122-18946122	1409	1422	-	12.4737	3.38e-05	0.134	GCTGCCAATCGCAA
SPI1	hTFtarget	NW_012015244.1:18944122-18946122	1583	1594	-	11.8	3.38e-05	0.134	GGGGGGTGGAAC
YY1	hTFtarget	NW_012015244.1:18944122-18946122	1077	1088	+	11.2424	3.38e-05	0.135	AAAGATGGAGCC
FOXO4	database	NW_012015244.1:18944122-18946122	1124	1137	+	11.7755	3.39e-05	0.128	TGTTTGTTAACCAT
YY1	hTFtarget	NW_012015244.1:18944122-18946122	1078	1088	+	12.3026	3.39e-05	0.135	AAGATGGAGCC
OSR1	database	NW_012015244.1:18944122-18946122	651	659	+	10.101	3.39e-05	0.131	ACAGTAGCT
AR	hTFtarget	NW_012015244.1:18944122-18946122	934	949	-	12.0303	3.4e-05	0.0543	AGCACAATGTGTGCTC
REST	hTFtarget	NW_012015244.1:18944122-18946122	233	244	-	12.2763	3.4e-05	0.0808	CAAGTGATGAAA
SMARCA4	hTFtarget	NW_012015244.1:18944122-18946122	719	727	+	12.4605	3.4e-05	0.0513	CCTGCTGGT
TCF21	hTFtarget	NW_012015244.1:18944122-18946122	1067	1075	+	13.1053	3.4e-05	0.0617	ACAGCTGGT
E2F8	hTFtarget	NW_012015244.1:18944122-18946122	606	621	+	11.4474	3.4e-05	0.134	ACACCATCACCCAGAG
SPDEF	database	NW_012015244.1:18944122-18946122	708	723	-	9.83838	3.4e-05	0.132	GCAGGAAAGAGTCAAA
HOXB8	database	NW_012015244.1:18944122-18946122	205	215	-	12.2556	3.41e-05	0.121	TTGATTAAAGA
FLI1	hTFtarget	NW_012015244.1:18944122-18946122	679	694	-	4.21212	3.41e-05	0.0853	GGGAAGGAAGTCAGTT
FOXA1	hTFtarget	NW_012015244.1:18944122-18946122	114	129	+	12.4697	3.41e-05	0.0693	CAGTATTGACATTGTC
GTF2I	hTFtarget	NW_012015244.1:18944122-18946122	1838	1859	-	10.4079	3.41e-05	0.0564	CCACAGCTTCAATAGCTGAAGC
IRF1	hTFtarget	NW_012015244.1:18944122-18946122	397	412	-	12.2468	3.41e-05	0.0422	AGAAGAGAGAGGGAGG
IRF5	hTFtarget	NW_012015244.1:18944122-18946122	1556	1567	-	10.8158	3.41e-05	0.133	GCTAGGGCTGCA
AR	hTFtarget	NW_012015244.1:18944122-18946122	1116	1124	+	12.2368	3.41e-05	0.134	GTCTGTGCT
TRIM28	hTFtarget	NW_012015244.1:18944122-18946122	314	327	+	6.42105	3.42e-05	0.0653	AATAAAAACTGAAA
EP300	hTFtarget	NW_012015244.1:18944122-18946122	682	694	+	12.1364	3.42e-05	0.0757	TGACTTCCTTCCC
NR1I3	database	NW_012015244.1:18944122-18946122	699	716	-	11.6222	3.43e-05	0.136	AGAGTCAAAGAGATTCAG
CACD	database	NW_012015244.1:18944122-18946122	1586	1593	+	12.3673	3.43e-05	0.137	CCACCCCC
HIRA	hTFtarget	NW_012015244.1:18944122-18946122	962	973	+	12.1711	3.43e-05	0.0644	AGTATTATTCCA
NANOG	hTFtarget	NW_012015244.1:18944122-18946122	719	727	-	12.5132	3.43e-05	0.0681	ACCAGCAGG
SOX2	hTFtarget	NW_012015244.1:18944122-18946122	1066	1074	-	12.3553	3.43e-05	0.068	CCAGCTGTG
SPI1	hTFtarget	NW_012015244.1:18944122-18946122	688	703	+	11.7105	3.43e-05	0.068	CCTTCCCTTCCCTGAA
SPI1	hTFtarget	NW_012015244.1:18944122-18946122	1579	1594	+	11.6842	3.43e-05	0.136	GCTTGTTCCACCCCCC
TAF1	hTFtarget	NW_012015244.1:18944122-18946122	1851	1866	-	10.7632	3.43e-05	0.0854	CCTGCTGCCACAGCTT
FLI1	hTFtarget	NW_012015244.1:18944122-18946122	675	699	-	-16.5658	3.44e-05	0.0699	GGGAAGGGAAGGAAGTCAGTTCAGG
FOXA1	hTFtarget	NW_012015244.1:18944122-18946122	1286	1300	-	12.3731	3.44e-05	0.0918	TCCTGTTTATATAAG
HDAC2	hTFtarget	NW_012015244.1:18944122-18946122	1442	1450	+	12.3816	3.44e-05	0.131	CAGAGGGCA
NPAT	hTFtarget	NW_012015244.1:18944122-18946122	865	880	-	11.9524	3.44e-05	0.122	AGAAGTTGTATTTGTA
TAF3	hTFtarget	NW_012015244.1:18944122-18946122	718	733	-	12.0395	3.44e-05	0.0658	GGAAGCACCAGCAGGA
ERG	hTFtarget	NW_012015244.1:18944122-18946122	683	694	-	12.3857	3.44e-05	0.137	GGGAAGGAAGTC
ZNF263	database	NW_012015244.1:18944122-18946122	685	705	-	10.9388	3.45e-05	0.0436	GATTCAGGGAAGGGAAGGAAG
AR	hTFtarget	NW_012015244.1:18944122-18946122	935	949	+	11.8421	3.45e-05	0.0659	AGCACACATTGTGCT
SMAD3	hTFtarget	NW_012015244.1:18944122-18946122	1066	1074	-	12.8816	3.45e-05	0.0454	CCAGCTGTG
AR	hTFtarget	NW_012015244.1:18944122-18946122	934	949	-	11.9857	3.45e-05	0.068	AGCACAATGTGTGCTC
CTCF	hTFtarget	NW_012015244.1:18944122-18946122	1937	1952	-	11.9737	3.45e-05	0.136	TTTGAAGAACTGCAAG
ERG	hTFtarget	NW_012015244.1:18944122-18946122	685	709	+	-20.3947	3.45e-05	0.0637	CTTCCTTCCCTTCCCTGAATCTCTT
EBF1	database	NW_012015244.1:18944122-18946122	572	582	+	12.5532	3.46e-05	0.0679	ATCCCCTGGGC
NR3C1	hTFtarget	NW_012015244.1:18944122-18946122	935	948	-	11.9394	3.46e-05	0.0677	GCACAATGTGTGCT
AR	hTFtarget	NW_012015244.1:18944122-18946122	468	476	-	12.2987	3.47e-05	0.132	GTGCAAACA
FOXA1	hTFtarget	NW_012015244.1:18944122-18946122	468	476	-	12.2361	3.47e-05	0.133	GTGCAAACA
MED1	hTFtarget	NW_012015244.1:18944122-18946122	913	928	-	12.1299	3.47e-05	0.0259	TTTTATTTCCATTTCA
MYB	hTFtarget	NW_012015244.1:18944122-18946122	713	724	+	12.4211	3.47e-05	0.0712	CTCTTTCCTGCT
TCF12	hTFtarget	NW_012015244.1:18944122-18946122	468	479	+	12.3333	3.47e-05	0.136	TGTTTGCACATG
OTX2	hTFtarget	NW_012015244.1:18944122-18946122	719	727	-	12.75	3.48e-05	0.0533	ACCAGCAGG
AR	hTFtarget	NW_012015244.1:18944122-18946122	1286	1297	+	12.2639	3.48e-05	0.0665	CTTATATAAACA
ETV7	database	NW_012015244.1:18944122-18946122	679	695	-	9.80734	3.49e-05	0.138	AGGGAAGGAAGTCAGTT
AR	hTFtarget	NW_012015244.1:18944122-18946122	1572	1587	+	12.0303	3.49e-05	0.0433	AGGCCCTGCTTGTTCC
NCOR2	hTFtarget	NW_012015244.1:18944122-18946122	317	328	+	12.2676	3.49e-05	0.0932	AAAAACTGAAAA
SP1	hTFtarget	NW_012015244.1:18944122-18946122	1583	1594	+	11.6286	3.49e-05	0.139	GTTCCACCCCCC
TBX10	database	NW_012015244.1:18944122-18946122	999	1018	-	1.68367	3.49e-05	0.138	TTCACAGGGTTCTGTGGGAT
FOXA1	hTFtarget	NW_012015244.1:18944122-18946122	1286	1301	-	12.1642	3.5e-05	0.0753	CTCCTGTTTATATAAG
SALL4	hTFtarget	NW_012015244.1:18944122-18946122	1921	1931	+	12.1711	3.5e-05	0.0676	CTCTGCAGGTG
AR	hTFtarget	NW_012015244.1:18944122-18946122	1123	1131	-	11.7917	3.5e-05	0.0681	AACAAACAG
EP300	hTFtarget	NW_012015244.1:18944122-18946122	312	320	+	12.4861	3.5e-05	0.133	GTAATAAAA
FOXA1	hTFtarget	NW_012015244.1:18944122-18946122	1286	1297	+	12.1944	3.51e-05	0.0438	CTTATATAAACA
TRIM24	hTFtarget	NW_012015244.1:18944122-18946122	315	336	+	11.6923	3.51e-05	0.0906	ATAAAAACTGAAAAAAAATGAG
SUMO2/SUMO3	hTFtarget	NW_012015244.1:18944122-18946122	1922	1937	+	11.987	3.52e-05	0.134	TCTGCAGGTGGTTTCC
SPI1	hTFtarget	NW_012015244.1:18944122-18946122	1579	1594	-	11.4286	3.53e-05	0.14	GGGGGGTGGAACAAGC
TCF4	hTFtarget	NW_012015244.1:18944122-18946122	1248	1259	-	12.2083	3.53e-05	0.137	GACATCAAATGT
GLIS2	database	NW_012015244.1:18944122-18946122	102	115	+	10.102	3.53e-05	0.14	CTCTGTGGGAGGCA
AR	hTFtarget	NW_012015244.1:18944122-18946122	935	950	+	11.7778	3.54e-05	0.0899	AGCACACATTGTGCTT
FOXA1	hTFtarget	NW_012015244.1:18944122-18946122	1285	1299	-	12.4776	3.54e-05	0.13	CCTGTTTATATAAGG
NR3C1	hTFtarget	NW_012015244.1:18944122-18946122	936	949	-	11.9394	3.54e-05	0.0687	AGCACAATGTGTGC
RUNX3	hTFtarget	NW_012015244.1:18944122-18946122	402	413	-	12.4605	3.54e-05	0.0664	AAGAAGAGAGAG
SPI1	hTFtarget	NW_012015244.1:18944122-18946122	1581	1595	-	11.8289	3.54e-05	0.141	TGGGGGGTGGAACAA
STAT1	hTFtarget	NW_012015244.1:18944122-18946122	914	929	-	12.0141	3.54e-05	0.117	TTTTTATTTCCATTTC
AR	hTFtarget	NW_012015244.1:18944122-18946122	1286	1297	+	12.4935	3.54e-05	0.102	CTTATATAAACA
HDAC1	hTFtarget	NW_012015244.1:18944122-18946122	683	694	+	12.4	3.55e-05	0.0698	GACTTCCTTCCC
THRB	database	NW_012015244.1:18944122-18946122	579	588	+	12.2073	3.56e-05	0.141	GGGCAGGACA
EBF1	database	NW_012015244.1:18944122-18946122	1911	1921	-	10.0407	3.56e-05	0.141	GTCCCCAGGGC
SPI1	hTFtarget	NW_012015244.1:18944122-18946122	1937	1954	-	9.89394	3.56e-05	0.0459	TATTTGAAGAACTGCAAG
TBP	hTFtarget	NW_012015244.1:18944122-18946122	1333	1344	+	11.8194	3.56e-05	0.0648	CCCTTTAAATGG
THRB	database	NW_012015244.1:18944122-18946122	579	588	-	12.1919	3.56e-05	0.141	TGTCCTGCCC
FOXA1	hTFtarget	NW_012015244.1:18944122-18946122	464	479	+	12.4627	3.57e-05	0.0663	TTTCTGTTTGCACATG
NFE2	database	NW_012015244.1:18944122-18946122	632	645	-	11.6935	3.58e-05	0.142	ACTGGGACTCAGCT
PDX1	database	NW_012015244.1:18944122-18946122	63	74	-	11.8701	3.58e-05	0.129	AGCCATTAATAT
STAT3	hTFtarget	NW_012015244.1:18944122-18946122	727	738	+	12.2273	3.58e-05	0.139	TGCTTCCTAGAA
ZNF92	hTFtarget	NW_012015244.1:18944122-18946122	666	681	+	4.82857	3.58e-05	0.139	GGGAACCACCCTGAAC
EHF	hTFtarget	NW_012015244.1:18944122-18946122	399	420	-	11.9178	3.58e-05	0.0273	AGAGGGTAAGAAGAGAGAGGGA
FOXA1	hTFtarget	NW_012015244.1:18944122-18946122	463	480	+	12.3134	3.59e-05	0.0819	CTTTCTGTTTGCACATGA
YY1	hTFtarget	NW_012015244.1:18944122-18946122	1850	1865	-	9.02632	3.59e-05	0.143	CTGCTGCCACAGCTTC
ZBTB33	hTFtarget	NW_012015244.1:18944122-18946122	1317	1332	+	11.7143	3.59e-05	0.0691	CACATTTTTAAAAAAT
CTCF	hTFtarget	NW_012015244.1:18944122-18946122	1938	1949	-	11.9079	3.59e-05	0.0958	GAAGAACTGCAA
GLI1	database	NW_012015244.1:18944122-18946122	1587	1596	+	12.2294	3.6e-05	0.0717	CACCCCCCAG
PLAG1	database	NW_012015244.1:18944122-18946122	385	400	-	11.8469	3.6e-05	0.141	GAGGCTGCTGAGAGGA
GLYR1	hTFtarget	NW_012015244.1:18944122-18946122	1554	1573	-	4.09211	3.6e-05	0.138	CTCTTAGCTAGGGCTGCAAG
EWSR1	hTFtarget	NW_012015244.1:18944122-18946122	687	702	-	7.14286	3.6e-05	0.0624	TCAGGGAAGGGAAGGA
HAND1	hTFtarget	NW_012015244.1:18944122-18946122	1509	1515	-	13.4143	3.6e-05	0.0719	CCAGGCC
HAND1	hTFtarget	NW_012015244.1:18944122-18946122	1593	1599	+	13.4143	3.6e-05	0.0719	CCAGGCC
YY1	database	NW_012015244.1:18944122-18946122	1077	1088	+	11.9615	3.61e-05	0.14	AAAGATGGAGCC
FOXO1	database	NW_012015244.1:18944122-18946122	1894	1902	+	11.9091	3.61e-05	0.137	CAAAACAAA
HOXD10	database	NW_012015244.1:18944122-18946122	842	858	+	11.4686	3.61e-05	0.0762	AATACATTAAAAATGAA
EZH2	hTFtarget	NW_012015244.1:18944122-18946122	389	410	+	11.7792	3.61e-05	0.0699	CTCAGCAGCCTCCCTCTCTCTT
FOXA1	hTFtarget	NW_012015244.1:18944122-18946122	1286	1301	-	12.3939	3.61e-05	0.126	CTCCTGTTTATATAAG
BCL6	hTFtarget	NW_012015244.1:18944122-18946122	1911	1919	-	12.7105	3.61e-05	0.143	CCCCAGGGC
HEY1	hTFtarget	NW_012015244.1:18944122-18946122	1078	1088	+	11.7895	3.62e-05	0.144	AAGATGGAGCC
STAT3	hTFtarget	NW_012015244.1:18944122-18946122	1741	1756	-	11.8846	3.62e-05	0.0394	TAGAAGAAAAAAAGTC
TRIM28	hTFtarget	NW_012015244.1:18944122-18946122	896	920	+	11.4615	3.62e-05	0.0995	AAGGGAAAAAAACCCCATGAAATGG
AR	hTFtarget	NW_012015244.1:18944122-18946122	935	950	+	11.8816	3.62e-05	0.0857	AGCACACATTGTGCTT
NFE2	database	NW_012015244.1:18944122-18946122	632	645	-	11.6855	3.62e-05	0.143	ACTGGGACTCAGCT
IRF3	database	NW_012015244.1:18944122-18946122	895	907	-	12.4862	3.63e-05	0.142	TTTTTTTCCCTTG
EBF1	database	NW_012015244.1:18944122-18946122	573	582	-	12.2247	3.63e-05	0.0828	GCCCAGGGGA
POU2F1	database	NW_012015244.1:18944122-18946122	1626	1637	-	11.2063	3.63e-05	0.0869	TGCTTTGCATGA
BRD4	hTFtarget	NW_012015244.1:18944122-18946122	737	761	+	11.2208	3.63e-05	0.035	AATCACCACCAAAAAAAAAAAAAAA
BRD4	hTFtarget	NW_012015244.1:18944122-18946122	397	408	+	11.8684	3.63e-05	0.144	CCTCCCTCTCTC
SP2	hTFtarget	NW_012015244.1:18944122-18946122	1683	1697	-	11.0789	3.63e-05	0.144	TCCTAGAGAGAATAC
TAL1	hTFtarget	NW_012015244.1:18944122-18946122	1970	1978	-	12.5286	3.63e-05	0.144	TCAGGAAGC
FIGLA	database	NW_012015244.1:18944122-18946122	1924	1933	-	12.1735	3.63e-05	0.0704	ACCACCTGCA
SPI1	hTFtarget	NW_012015244.1:18944122-18946122	1579	1594	-	11.4342	3.64e-05	0.145	GGGGGGTGGAACAAGC
EZH2	hTFtarget	NW_012015244.1:18944122-18946122	442	453	-	11.1053	3.65e-05	0.145	GGCCAAGAATGG
TBP	hTFtarget	NW_012015244.1:18944122-18946122	1285	1296	-	11.8056	3.65e-05	0.0648	GTTTATATAAGG
HNF1A	database	NW_012015244.1:18944122-18946122	338	352	-	11.8556	3.66e-05	0.122	AGTTATTAATTATTC
STAT6	database	NW_012015244.1:18944122-18946122	683	690	+	10.1316	3.66e-05	0.0705	GACTTCCT
STAT6	database	NW_012015244.1:18944122-18946122	1957	1964	-	10.1316	3.66e-05	0.0705	GACTTCCT
RUNX1	hTFtarget	NW_012015244.1:18944122-18946122	415	426	-	11.5526	3.67e-05	0.146	ACAGGCAGAGGG
SPIB	hTFtarget	NW_012015244.1:18944122-18946122	1952	1967	+	10.6667	3.67e-05	0.0543	ATAAAAGGAAGTCTAA
CTCF	hTFtarget	NW_012015244.1:18944122-18946122	1936	1947	-	11.8947	3.67e-05	0.135	AGAACTGCAAGG
EZH2	hTFtarget	NW_012015244.1:18944122-18946122	839	860	+	10.9884	3.68e-05	0.0336	ACAAATACATTAAAAATGAAGA
MYB	hTFtarget	NW_012015244.1:18944122-18946122	682	693	+	12.3553	3.68e-05	0.0712	TGACTTCCTTCC
SMAD1	hTFtarget	NW_012015244.1:18944122-18946122	718	727	+	12.5571	3.68e-05	0.146	TCCTGCTGGT
SPI1	hTFtarget	NW_012015244.1:18944122-18946122	1709	1720	+	12.0909	3.68e-05	0.0708	AGTGAGGAAGAC
TP53	hTFtarget	NW_012015244.1:18944122-18946122	1102	1124	-	8.85714	3.68e-05	0.0467	AGCACAGACAAAGGAGCCAGACT
AR	hTFtarget	NW_012015244.1:18944122-18946122	468	478	-	12.0139	3.68e-05	0.136	ATGTGCAAACA
ZKSCAN4	database	NW_012015244.1:18944122-18946122	598	611	+	7.42857	3.68e-05	0.146	TATAGGCTACACCA
STAT3	hTFtarget	NW_012015244.1:18944122-18946122	750	765	+	11.859	3.69e-05	0.0394	AAAAAAAAAAAAAATT
ZNF280D	hTFtarget	NW_012015244.1:18944122-18946122	685	700	-	12.1429	3.69e-05	0.1	AGGGAAGGGAAGGAAG
ERG	hTFtarget	NW_012015244.1:18944122-18946122	482	493	-	12	3.69e-05	0.0381	CTTCCAGTCTTC
SPI1	hTFtarget	NW_012015244.1:18944122-18946122	1582	1593	-	11.7237	3.7e-05	0.147	GGGGGTGGAACA
SPI1	hTFtarget	NW_012015244.1:18944122-18946122	1579	1594	+	11.8143	3.7e-05	0.147	GCTTGTTCCACCCCCC
SPI1	hTFtarget	NW_012015244.1:18944122-18946122	1409	1422	-	12.1571	3.7e-05	0.147	GCTGCCAATCGCAA
EP300	hTFtarget	NW_012015244.1:18944122-18946122	910	921	+	7.75	3.7e-05	0.144	CCATGAAATGGA
NKX6-1	database	NW_012015244.1:18944122-18946122	339	355	+	11.7283	3.71e-05	0.0663	AATAATTAATAACTTCT
ESR1	hTFtarget	NW_012015244.1:18944122-18946122	395	409	+	11.6119	3.71e-05	0.0708	AGCCTCCCTCTCTCT
FLI1	hTFtarget	NW_012015244.1:18944122-18946122	401	425	-	-16.9211	3.71e-05	0.0699	CAGGCAGAGGGTAAGAAGAGAGAGG
ZNF263	hTFtarget	NW_012015244.1:18944122-18946122	397	418	-	10.9221	3.71e-05	0.0703	AGGGTAAGAAGAGAGAGGGAGG
E2F6	database	NW_012015244.1:18944122-18946122	396	406	-	12.5	3.72e-05	0.147	GAGAGGGAGGC
E2F6	hTFtarget	NW_012015244.1:18944122-18946122	397	408	-	12.5286	3.72e-05	0.148	GAGAGAGGGAGG
FOXA2	hTFtarget	NW_012015244.1:18944122-18946122	464	479	+	12.3788	3.73e-05	0.0827	TTTCTGTTTGCACATG
ICE1	hTFtarget	NW_012015244.1:18944122-18946122	1077	1088	+	11.25	3.73e-05	0.148	AAAGATGGAGCC
BCL6	hTFtarget	NW_012015244.1:18944122-18946122	139	150	-	12.1579	3.73e-05	0.0911	CACTTCTGCTTC
SNAI2	hTFtarget	NW_012015244.1:18944122-18946122	1924	1932	+	12.4143	3.73e-05	0.0804	TGCAGGTGG
SUMO2	hTFtarget	NW_012015244.1:18944122-18946122	934	949	-	11.7286	3.73e-05	0.073	AGCACAATGTGTGCTC
TAF1	hTFtarget	NW_012015244.1:18944122-18946122	1850	1871	-	10.2368	3.74e-05	0.148	TCACACCTGCTGCCACAGCTTC
AR	hTFtarget	NW_012015244.1:18944122-18946122	458	473	+	11.4648	3.74e-05	0.141	GGTTTCTTTCTGTTTG
NR1D1	database	NW_012015244.1:18944122-18946122	1339	1352	-	11.2857	3.74e-05	0.142	ACTGACATCCATTT
FOXA1	hTFtarget	NW_012015244.1:18944122-18946122	1285	1300	-	12.3333	3.75e-05	0.0693	TCCTGTTTATATAAGG
SOX2	hTFtarget	NW_012015244.1:18944122-18946122	1111	1119	+	12.2429	3.75e-05	0.143	CCTTTGTCT
SPI1	hTFtarget	NW_012015244.1:18944122-18946122	1577	1592	+	11.0132	3.75e-05	0.149	CTGCTTGTTCCACCCC
SPI1	hTFtarget	NW_012015244.1:18944122-18946122	682	697	+	11.0455	3.75e-05	0.0596	TGACTTCCTTCCCTTC
TBL1XR1	hTFtarget	NW_012015244.1:18944122-18946122	402	417	-	11.8873	3.75e-05	0.0675	GGGTAAGAAGAGAGAG
FOXA1	hTFtarget	NW_012015244.1:18944122-18946122	468	479	-	12.1806	3.76e-05	0.0718	CATGTGCAAACA
NR3C1	hTFtarget	NW_012015244.1:18944122-18946122	938	949	-	12.4	3.76e-05	0.147	AGCACAATGTGT
AR	hTFtarget	NW_012015244.1:18944122-18946122	929	948	-	11.8636	3.76e-05	0.0737	GCACAATGTGTGCTCATCAT
FOXA1	hTFtarget	NW_012015244.1:18944122-18946122	468	479	+	12.5224	3.77e-05	0.141	TGTTTGCACATG
SPI1	hTFtarget	NW_012015244.1:18944122-18946122	1583	1594	-	11.2368	3.77e-05	0.15	GGGGGGTGGAAC
E2F7	hTFtarget	NW_012015244.1:18944122-18946122	1763	1771	+	12.1053	3.77e-05	0.0743	AAACATCTG
ONECUT2	database	NW_012015244.1:18944122-18946122	1730	1750	+	9.54464	3.78e-05	0.0672	AGGATAACTTGGACTTTTTTT
SRF	database	NW_012015244.1:18944122-18946122	441	455	+	10.9633	3.78e-05	0.11	ACCATTCTTGGCCCA
IRF3	hTFtarget	NW_012015244.1:18944122-18946122	747	762	+	11.7792	3.78e-05	0.0386	AAAAAAAAAAAAAAAA
IRF3	hTFtarget	NW_012015244.1:18944122-18946122	748	763	+	11.7792	3.78e-05	0.0386	AAAAAAAAAAAAAAAA
SPI1	hTFtarget	NW_012015244.1:18944122-18946122	1409	1420	-	12.4079	3.78e-05	0.15	TGCCAATCGCAA
TP53	hTFtarget	NW_012015244.1:18944122-18946122	148	169	+	-4.91667	3.78e-05	0.0665	GTGACAGGTAGGGAGACAAACC
ID2	database	NW_012015244.1:18944122-18946122	1861	1870	+	12.8367	3.78e-05	0.15	AGCAGGTGTG
SOX14	database	NW_012015244.1:18944122-18946122	1208	1220	+	9.92857	3.78e-05	0.0742	ACAGTTACATTGT
NR1D1	database	NW_012015244.1:18944122-18946122	1339	1352	+	11.2857	3.79e-05	0.144	AAATGGATGTCAGT
SP2	hTFtarget	NW_012015244.1:18944122-18946122	147	168	+	11.2237	3.79e-05	0.15	AGTGACAGGTAGGGAGACAAAC
TAL1	hTFtarget	NW_012015244.1:18944122-18946122	1858	1866	+	12.1571	3.79e-05	0.0688	GGCAGCAGG
CREB1	hTFtarget	NW_012015244.1:18944122-18946122	142	166	-	11.1892	3.79e-05	0.027	TTGTCTCCCTACCTGTCACTTCTGC
HNF4A	hTFtarget	NW_012015244.1:18944122-18946122	1021	1032	+	12.1579	3.8e-05	0.148	AGAGTCCAGAGA
CTCF	hTFtarget	NW_012015244.1:18944122-18946122	1936	1947	-	11.8816	3.8e-05	0.15	AGAACTGCAAGG
TP53	hTFtarget	NW_012015244.1:18944122-18946122	179	196	-	-2.43056	3.81e-05	0.0499	CAGAGACAGGTACTCAGG
ZNF76	hTFtarget	NW_012015244.1:18944122-18946122	606	621	-	9.48684	3.81e-05	0.151	CTCTGGGTGATGGTGT
CTCF	hTFtarget	NW_012015244.1:18944122-18946122	1938	1946	+	11.9605	3.81e-05	0.145	TTGCAGTTC
STAT3	database	NW_012015244.1:18944122-18946122	729	739	-	12.102	3.82e-05	0.139	ATTCTAGGAAG
HEY1	hTFtarget	NW_012015244.1:18944122-18946122	689	700	-	11.9605	3.82e-05	0.0716	AGGGAAGGGAAG
MYBL2	hTFtarget	NW_012015244.1:18944122-18946122	1007	1028	+	10.1447	3.82e-05	0.149	GAACCCTGTGAAGTAGAGTCCA
BRD4	hTFtarget	NW_012015244.1:18944122-18946122	455	466	+	12.0526	3.82e-05	0.0751	AAAGGTTTCTTT
SMARCA4	hTFtarget	NW_012015244.1:18944122-18946122	1953	1968	-	12.4286	3.82e-05	0.0648	CTTAGACTTCCTTTTA
SPI1	hTFtarget	NW_012015244.1:18944122-18946122	1581	1596	-	11.3714	3.82e-05	0.152	CTGGGGGGTGGAACAA
FLI1	hTFtarget	NW_012015244.1:18944122-18946122	479	494	+	11.1586	3.83e-05	0.037	GAGGAAGACTGGAAGT
FOXA1	hTFtarget	NW_012015244.1:18944122-18946122	1286	1297	+	12.1667	3.83e-05	0.0718	CTTATATAAACA
FOXA1	hTFtarget	NW_012015244.1:18944122-18946122	1286	1300	-	12.2879	3.83e-05	0.0977	TCCTGTTTATATAAG
KDM5B	hTFtarget	NW_012015244.1:18944122-18946122	1910	1921	+	11.75	3.83e-05	0.152	GGCCCTGGGGAC
POLR2A	hTFtarget	NW_012015244.1:18944122-18946122	1849	1870	-	9.81579	3.83e-05	0.144	CACACCTGCTGCCACAGCTTCA
RCOR1	hTFtarget	NW_012015244.1:18944122-18946122	1666	1681	-	11	3.83e-05	0.0605	CTGCATCTTAGTCTTC
BRD4	hTFtarget	NW_012015244.1:18944122-18946122	1954	1962	+	12.3158	3.83e-05	0.147	AAAAGGAAG
SMAD1	hTFtarget	NW_012015244.1:18944122-18946122	226	234	-	12.9	3.83e-05	0.151	AAATTCCAG
SMAD1	hTFtarget	NW_012015244.1:18944122-18946122	226	234	-	12.5571	3.83e-05	0.151	AAATTCCAG
SOX2	hTFtarget	NW_012015244.1:18944122-18946122	1111	1119	+	12.0417	3.83e-05	0.149	CCTTTGTCT
EP300	hTFtarget	NW_012015244.1:18944122-18946122	713	725	+	12.0303	3.83e-05	0.0757	CTCTTTCCTGCTG
FOXA2	hTFtarget	NW_012015244.1:18944122-18946122	719	727	-	12.3553	3.84e-05	0.0457	ACCAGCAGG
JUND	database	NW_012015244.1:18944122-18946122	1184	1198	-	11.9574	3.85e-05	0.0764	TTTCATGATATCATG
IRF1	hTFtarget	NW_012015244.1:18944122-18946122	398	413	+	11.9	3.85e-05	0.0926	CTCCCTCTCTCTTCTT
NCOR1	hTFtarget	NW_012015244.1:18944122-18946122	684	695	-	12.2286	3.85e-05	0.0509	AGGGAAGGAAGT
SPIB	hTFtarget	NW_012015244.1:18944122-18946122	851	866	-	9.71212	3.85e-05	0.0533	TACATTTCTTCATTTT
CTCF	hTFtarget	NW_012015244.1:18944122-18946122	1938	1947	-	12.0395	3.85e-05	0.153	AGAACTGCAA
ETS1	hTFtarget	NW_012015244.1:18944122-18946122	606	621	+	10.4737	3.86e-05	0.102	ACACCATCACCCAGAG
RFX5	hTFtarget	NW_012015244.1:18944122-18946122	169	184	-	11.7121	3.86e-05	0.153	CTCAGGTGTTGACAGG
ERG	hTFtarget	NW_012015244.1:18944122-18946122	397	408	+	11.9211	3.86e-05	0.0381	CCTCCCTCTCTC
TEAD4	database	NW_012015244.1:18944122-18946122	1398	1409	-	11.9643	3.87e-05	0.145	AAAGCTGTTGTT
THRB	database	NW_012015244.1:18944122-18946122	572	588	+	11.6556	3.87e-05	0.153	ATCCCCTGGGCAGGACA
ESR1	hTFtarget	NW_012015244.1:18944122-18946122	1740	1758	-	9.47368	3.87e-05	0.146	CATAGAAGAAAAAAAGTCC
FOXA1	hTFtarget	NW_012015244.1:18944122-18946122	1286	1305	-	12.2879	3.87e-05	0.135	ACTGCTCCTGTTTATATAAG
POLR2A	hTFtarget	NW_012015244.1:18944122-18946122	1853	1868	-	10.5658	3.87e-05	0.154	CACCTGCTGCCACAGC
TCF7L2	hTFtarget	NW_012015244.1:18944122-18946122	834	845	+	12.4805	3.87e-05	0.102	CCTGAACAAATA
TEAD4	database	NW_012015244.1:18944122-18946122	1398	1409	+	11.9703	3.87e-05	0.146	AACAACAGCTTT
EZH2	hTFtarget	NW_012015244.1:18944122-18946122	912	923	+	11.7532	3.88e-05	0.152	ATGAAATGGAAA
T	hTFtarget	NW_012015244.1:18944122-18946122	1920	1934	+	11.9091	3.88e-05	0.0769	ACTCTGCAGGTGGTT
TCF12	hTFtarget	NW_012015244.1:18944122-18946122	1969	1977	-	12.5286	3.88e-05	0.154	CAGGAAGCT
ELF5	database	NW_012015244.1:18944122-18946122	304	314	+	11.9326	3.89e-05	0.0927	TAAAGGATGTA
FOXA1	hTFtarget	NW_012015244.1:18944122-18946122	834	845	+	11.75	3.89e-05	0.0592	CCTGAACAAATA
AR	hTFtarget	NW_012015244.1:18944122-18946122	931	942	+	12.1558	3.89e-05	0.0682	GATGAGCACACA
IRF4	hTFtarget	NW_012015244.1:18944122-18946122	142	153	+	11.4848	3.89e-05	0.136	GCAGAAGTGACA
BCOR	hTFtarget	NW_012015244.1:18944122-18946122	316	327	+	11.8472	3.89e-05	0.0638	TAAAAACTGAAA
POLR2A	hTFtarget	NW_012015244.1:18944122-18946122	387	401	-	10.3421	3.89e-05	0.11	GGAGGCTGCTGAGAG
FOXA1	database	NW_012015244.1:18944122-18946122	467	476	-	12.6515	3.9e-05	0.144	GTGCAAACAG
SMARCA4	hTFtarget	NW_012015244.1:18944122-18946122	1066	1074	-	12.4079	3.9e-05	0.0513	CCAGCTGTG
SPI1	hTFtarget	NW_012015244.1:18944122-18946122	1579	1594	-	11.7571	3.9e-05	0.154	GGGGGGTGGAACAAGC
SPI1	hTFtarget	NW_012015244.1:18944122-18946122	1579	1594	+	11.3571	3.9e-05	0.155	GCTTGTTCCACCCCCC
TLX1	database	NW_012015244.1:18944122-18946122	948	964	+	11.2913	3.9e-05	0.154	CTTGCTATATGCCAAGT
CDK8	hTFtarget	NW_012015244.1:18944122-18946122	746	761	-	11.8442	3.91e-05	0.0298	TTTTTTTTTTTTTTTG
ELK3	hTFtarget	NW_012015244.1:18944122-18946122	1578	1593	-	10.8947	3.91e-05	0.155	GGGGGTGGAACAAGCA
ONECUT2	database	NW_012015244.1:18944122-18946122	1730	1750	+	8.12871	3.91e-05	0.0698	AGGATAACTTGGACTTTTTTT
BCL11A	hTFtarget	NW_012015244.1:18944122-18946122	719	727	-	12.2286	3.92e-05	0.0585	ACCAGCAGG
BCL6	hTFtarget	NW_012015244.1:18944122-18946122	730	741	-	11.6479	3.92e-05	0.107	TGATTCTAGGAA
PAX3	hTFtarget	NW_012015244.1:18944122-18946122	909	920	+	12.1711	3.92e-05	0.156	CCCATGAAATGG
ERG	hTFtarget	NW_012015244.1:18944122-18946122	689	700	+	11.8947	3.92e-05	0.0381	CTTCCCTTCCCT
AR	hTFtarget	NW_012015244.1:18944122-18946122	934	949	+	11.7632	3.93e-05	0.077	GAGCACACATTGTGCT
FOXA1	hTFtarget	NW_012015244.1:18944122-18946122	1286	1300	-	12.2239	3.93e-05	0.0795	TCCTGTTTATATAAG
FOXP2	database	NW_012015244.1:18944122-18946122	1289	1299	+	12.8333	3.94e-05	0.0774	ATATAAACAGG
FOXA1	hTFtarget	NW_012015244.1:18944122-18946122	468	479	-	12.4925	3.94e-05	0.103	CATGTGCAAACA
YY1	hTFtarget	NW_012015244.1:18944122-18946122	1853	1868	+	10.4474	3.94e-05	0.132	GCTGTGGCAGCAGGTG
ELF5	database	NW_012015244.1:18944122-18946122	304	314	+	11.9286	3.94e-05	0.0958	TAAAGGATGTA
TBX20	database	NW_012015244.1:18944122-18946122	1693	1708	+	5.93878	3.94e-05	0.156	TAGGACCTTAAAACCT
FOXA1	hTFtarget	NW_012015244.1:18944122-18946122	467	478	-	11.8507	3.95e-05	0.117	ATGTGCAAACAG
GCM1	database	NW_012015244.1:18944122-18946122	1810	1823	+	12.3571	3.95e-05	0.0808	CAGATGTTGGTGCG
GCM1	database	NW_012015244.1:18944122-18946122	1810	1823	+	12.3211	3.96e-05	0.0821	CAGATGTTGGTGCG
HAND1	hTFtarget	NW_012015244.1:18944122-18946122	1079	1094	+	12.1571	3.96e-05	0.154	AGATGGAGCCCAGACT
E2F8	hTFtarget	NW_012015244.1:18944122-18946122	233	241	-	11.8429	3.96e-05	0.155	GTGATGAAA
TLX1	database	NW_012015244.1:18944122-18946122	948	964	+	11.2941	3.97e-05	0.157	CTTGCTATATGCCAAGT
FOXA2	hTFtarget	NW_012015244.1:18944122-18946122	464	479	-	12.0909	3.97e-05	0.103	CATGTGCAAACAGAAA
OTX2	hTFtarget	NW_012015244.1:18944122-18946122	1921	1929	+	12.2105	3.97e-05	0.0562	CTCTGCAGG
EOMES	hTFtarget	NW_012015244.1:18944122-18946122	1921	1929	+	12.2368	3.97e-05	0.0787	CTCTGCAGG
ERG	hTFtarget	NW_012015244.1:18944122-18946122	1971	1979	+	12.1857	3.98e-05	0.0623	CTTCCTGAC
FOXA1	hTFtarget	NW_012015244.1:18944122-18946122	113	128	-	12.2273	3.98e-05	0.0791	ACAATGTCAATACTGC
TP53	hTFtarget	NW_012015244.1:18944122-18946122	224	232	-	11.3684	3.98e-05	0.157	ATTCCAGTC
ERG	hTFtarget	NW_012015244.1:18944122-18946122	467	477	-	12.1299	3.98e-05	0.146	TGTGCAAACAG
FLI1	hTFtarget	NW_012015244.1:18944122-18946122	686	694	+	11.6667	3.99e-05	0.152	TTCCTTCCC
FOXA1	hTFtarget	NW_012015244.1:18944122-18946122	464	479	+	12.0299	3.99e-05	0.0753	TTTCTGTTTGCACATG
SPI1	hTFtarget	NW_012015244.1:18944122-18946122	1938	1953	-	9.33333	3.99e-05	0.0521	ATTTGAAGAACTGCAA
CEBPA	hTFtarget	NW_012015244.1:18944122-18946122	1954	1965	+	12.0606	3.99e-05	0.156	AAAAGGAAGTCT
ESR1	hTFtarget	NW_012015244.1:18944122-18946122	466	477	-	12.1948	4e-05	0.0959	TGTGCAAACAGA
FOXA1	hTFtarget	NW_012015244.1:18944122-18946122	117	128	-	12.3636	4e-05	0.112	ACAATGTCAATA
GTF3C2	hTFtarget	NW_012015244.1:18944122-18946122	497	518	+	4.65714	4e-05	0.0792	TAGGGGTTTAATGCCCTGGGAG
ASCL1	hTFtarget	NW_012015244.1:18944122-18946122	1923	1931	+	12.8333	4e-05	0.0792	CTGCAGGTG
SOX17	hTFtarget	NW_012015244.1:18944122-18946122	1593	1600	-	12.5143	4e-05	0.106	AGGCCTGG
EP300	hTFtarget	NW_012015244.1:18944122-18946122	719	727	-	12.0526	4e-05	0.0792	ACCAGCAGG
IRF4	database	NW_012015244.1:18944122-18946122	913	928	+	11.7822	4e-05	0.03	TGAAATGGAAATAAAA
IRF4	database	NW_012015244.1:18944122-18946122	913	928	+	11.7966	4.01e-05	0.0303	TGAAATGGAAATAAAA
FOXA1	hTFtarget	NW_012015244.1:18944122-18946122	1285	1299	+	12.2836	4.01e-05	0.119	CCTTATATAAACAGG
PML	hTFtarget	NW_012015244.1:18944122-18946122	477	485	-	11.9143	4.01e-05	0.0792	CTTCCTCAT
POLR2A	hTFtarget	NW_012015244.1:18944122-18946122	508	523	+	10.3421	4.02e-05	0.16	TGCCCTGGGAGCAGCG
TCF12	hTFtarget	NW_012015244.1:18944122-18946122	1921	1929	+	12.25	4.02e-05	0.16	CTCTGCAGG
FLI1	database	NW_012015244.1:18944122-18946122	679	695	-	11.8687	4.02e-05	0.155	AGGGAAGGAAGTCAGTT
ETS1	hTFtarget	NW_012015244.1:18944122-18946122	683	694	-	12.2571	4.03e-05	0.16	GGGAAGGAAGTC
AR	hTFtarget	NW_012015244.1:18944122-18946122	461	476	-	11.8718	4.03e-05	0.0504	GTGCAAACAGAAAGAA
AR	hTFtarget	NW_012015244.1:18944122-18946122	935	950	+	11.8182	4.03e-05	0.0543	AGCACACATTGTGCTT
HIF1A	hTFtarget	NW_012015244.1:18944122-18946122	704	715	-	11.9351	4.03e-05	0.0772	GAGTCAAAGAGA
OTX2	hTFtarget	NW_012015244.1:18944122-18946122	1921	1929	+	12.5658	4.03e-05	0.0533	CTCTGCAGG
POLR2A	hTFtarget	NW_012015244.1:18944122-18946122	398	413	-	11.8182	4.03e-05	0.0476	AAGAAGAGAGAGGGAG
ZBTB17	hTFtarget	NW_012015244.1:18944122-18946122	913	931	+	4.26316	4.03e-05	0.0448	TGAAATGGAAATAAAAATG
SPI1	database	NW_012015244.1:18944122-18946122	1951	1967	+	11.0909	4.04e-05	0.0494	AATAAAAGGAAGTCTAA
GTF2I	hTFtarget	NW_012015244.1:18944122-18946122	1848	1869	+	10.0658	4.04e-05	0.0564	TTGAAGCTGTGGCAGCAGGTGT
POLR2A	hTFtarget	NW_012015244.1:18944122-18946122	1078	1089	+	11.7237	4.04e-05	0.161	AAGATGGAGCCC
RELA	hTFtarget	NW_012015244.1:18944122-18946122	144	155	+	12.0658	4.04e-05	0.0904	AGAAGTGACAGG
SMAD3	hTFtarget	NW_012015244.1:18944122-18946122	719	727	-	12.1571	4.04e-05	0.0571	ACCAGCAGG
SPI1	hTFtarget	NW_012015244.1:18944122-18946122	1952	1967	+	9.30303	4.04e-05	0.0521	ATAAAAGGAAGTCTAA
ZNF143	hTFtarget	NW_012015244.1:18944122-18946122	606	621	+	10.2632	4.04e-05	0.16	ACACCATCACCCAGAG
AR	hTFtarget	NW_012015244.1:18944122-18946122	1572	1587	-	11.9091	4.04e-05	0.0515	GGAACAAGCAGGGCCT
GLI1	database	NW_012015244.1:18944122-18946122	1586	1596	-	11.5778	4.05e-05	0.11	CTGGGGGGTGG
GRHL2	hTFtarget	NW_012015244.1:18944122-18946122	878	893	+	11.8636	4.05e-05	0.161	TCTTGTAAATCAAGTT
GTF2I	hTFtarget	NW_012015244.1:18944122-18946122	401	422	+	9.96053	4.05e-05	0.0789	CCTCTCTCTTCTTACCCTCTGC
GTF2I	hTFtarget	NW_012015244.1:18944122-18946122	777	792	+	11.1184	4.05e-05	0.0803	GCTCTGTTTCTGAGGT
TFAP2C	hTFtarget	NW_012015244.1:18944122-18946122	1586	1601	-	11.9848	4.05e-05	0.0986	CAGGCCTGGGGGGTGG
SNAI2	hTFtarget	NW_012015244.1:18944122-18946122	1861	1869	+	12.2857	4.06e-05	0.0804	AGCAGGTGT
CTCF	hTFtarget	NW_012015244.1:18944122-18946122	606	624	+	10.6061	4.06e-05	0.16	ACACCATCACCCAGAGGTC
EZH2	hTFtarget	NW_012015244.1:18944122-18946122	911	922	+	10.4737	4.07e-05	0.115	CATGAAATGGAA
MXI1	hTFtarget	NW_012015244.1:18944122-18946122	782	797	-	10.3158	4.07e-05	0.0914	GGGTTACCTCAGAAAC
RELA	hTFtarget	NW_012015244.1:18944122-18946122	1938	1949	-	11.9079	4.07e-05	0.0872	GAAGAACTGCAA
SPI1	hTFtarget	NW_012015244.1:18944122-18946122	562	576	+	11.8684	4.07e-05	0.0774	CAACTTCTTCATCCC
GCM1	database	NW_012015244.1:18944122-18946122	717	730	+	12.3163	4.07e-05	0.0808	TTCCTGCTGGTGCT
SPI1	database	NW_012015244.1:18944122-18946122	1951	1967	+	11.102	4.07e-05	0.0506	AATAAAAGGAAGTCTAA
FLI1	database	NW_012015244.1:18944122-18946122	679	695	-	11.8333	4.08e-05	0.153	AGGGAAGGAAGTCAGTT
HNF4A	hTFtarget	NW_012015244.1:18944122-18946122	1505	1516	+	11.8571	4.08e-05	0.0809	GTGTGGCCTGGG
IRF5	hTFtarget	NW_012015244.1:18944122-18946122	403	421	+	6.57895	4.08e-05	0.0534	TCTCTCTTCTTACCCTCTG
ZNF143	hTFtarget	NW_012015244.1:18944122-18946122	1000	1015	+	10.6842	4.08e-05	0.162	TCCCACAGAACCCTGT
GLI1	database	NW_012015244.1:18944122-18946122	1586	1596	-	11.5714	4.08e-05	0.11	CTGGGGGGTGG
CREM	database	NW_012015244.1:18944122-18946122	1253	1263	+	11.9222	4.09e-05	0.163	TGATGTCATTA
GTF3C2	hTFtarget	NW_012015244.1:18944122-18946122	390	411	+	10.6867	4.09e-05	0.162	TCAGCAGCCTCCCTCTCTCTTC
SUMO2/SUMO3	hTFtarget	NW_012015244.1:18944122-18946122	938	949	+	12.1714	4.09e-05	0.104	ACACATTGTGCT
ZBTB33	hTFtarget	NW_012015244.1:18944122-18946122	606	621	+	11.641	4.09e-05	0.16	ACACCATCACCCAGAG
FOXA2	hTFtarget	NW_012015244.1:18944122-18946122	468	476	-	12.1299	4.1e-05	0.156	GTGCAAACA
FOXK1	hTFtarget	NW_012015244.1:18944122-18946122	1115	1123	-	12.1268	4.1e-05	0.162	GCACAGACA
SMAD4	hTFtarget	NW_012015244.1:18944122-18946122	893	917	+	11.5584	4.1e-05	0.154	TACAAGGGAAAAAAACCCCATGAAA
STAT3	database	NW_012015244.1:18944122-18946122	729	739	+	11.6061	4.1e-05	0.162	CTTCCTAGAAT
IRF3	hTFtarget	NW_012015244.1:18944122-18946122	913	934	+	10.4507	4.12e-05	0.0547	TGAAATGGAAATAAAAATGATG
IRF3	hTFtarget	NW_012015244.1:18944122-18946122	138	153	+	11.6364	4.12e-05	0.0386	AGAAGCAGAAGTGACA
SPI1	hTFtarget	NW_012015244.1:18944122-18946122	1579	1594	+	11.4	4.12e-05	0.164	GCTTGTTCCACCCCCC
TRIM28	hTFtarget	NW_012015244.1:18944122-18946122	1078	1102	-	10.2436	4.12e-05	0.15	TGAGTTTGAGTCTGGGCTCCATCTT
GCM1	database	NW_012015244.1:18944122-18946122	717	730	+	12.2661	4.13e-05	0.0821	TTCCTGCTGGTGCT
RORC	database	NW_012015244.1:18944122-18946122	11	23	+	10.4679	4.13e-05	0.159	ATATGTAGCTCAG
GATA4	database	NW_012015244.1:18944122-18946122	1950	1961	+	12.1009	4.13e-05	0.146	AAATAAAAGGAA
BRF1	database	NW_012015244.1:18944122-18946122	500	512	+	11.0857	4.13e-05	0.155	GGGTTTAATGCCC
GATA3	hTFtarget	NW_012015244.1:18944122-18946122	682	693	-	12	4.13e-05	0.16	GGAAGGAAGTCA
HNF4A	hTFtarget	NW_012015244.1:18944122-18946122	508	516	-	12.1286	4.13e-05	0.0824	CCCAGGGCA
PALB2	hTFtarget	NW_012015244.1:18944122-18946122	1744	1759	+	11.8214	4.13e-05	0.076	TTTTTTTCTTCTATGA
SPI1	hTFtarget	NW_012015244.1:18944122-18946122	1581	1596	+	11.6143	4.13e-05	0.164	TTGTTCCACCCCCCAG
ETV4	database	NW_012015244.1:18944122-18946122	1970	1977	-	11.5111	4.14e-05	0.125	CAGGAAGC
SPI1	hTFtarget	NW_012015244.1:18944122-18946122	1583	1594	-	11.5526	4.14e-05	0.165	GGGGGGTGGAAC
SPI1	hTFtarget	NW_012015244.1:18944122-18946122	1579	1594	+	11.3	4.14e-05	0.164	GCTTGTTCCACCCCCC
STAT1	hTFtarget	NW_012015244.1:18944122-18946122	729	740	-	12.2727	4.14e-05	0.0776	GATTCTAGGAAG
ETV4	database	NW_012015244.1:18944122-18946122	1970	1977	-	11.5051	4.14e-05	0.126	CAGGAAGC
STAT3	database	NW_012015244.1:18944122-18946122	729	739	+	11.5909	4.15e-05	0.165	CTTCCTAGAAT
ESR1	hTFtarget	NW_012015244.1:18944122-18946122	410	431	-	10.2687	4.15e-05	0.0415	CAGTCACAGGCAGAGGGTAAGA
FOXA1	hTFtarget	NW_012015244.1:18944122-18946122	114	128	+	12.2727	4.15e-05	0.148	CAGTATTGACATTGT
POU2F1	hTFtarget	NW_012015244.1:18944122-18946122	1078	1088	+	11.5658	4.15e-05	0.165	AAGATGGAGCC
SPI1	hTFtarget	NW_012015244.1:18944122-18946122	851	865	+	10.4091	4.15e-05	0.0535	AAAATGAAGAAATGT
SPIB	hTFtarget	NW_012015244.1:18944122-18946122	1951	1966	-	9.51515	4.15e-05	0.0533	TAGACTTCCTTTTATT
TOP1	hTFtarget	NW_012015244.1:18944122-18946122	467	475	-	12.2857	4.15e-05	0.0803	TGCAAACAG
ZNF143	hTFtarget	NW_012015244.1:18944122-18946122	1000	1016	-	9.60526	4.15e-05	0.165	CACAGGGTTCTGTGGGA
FOXA1	database	NW_012015244.1:18944122-18946122	464	478	+	12.2653	4.16e-05	0.154	TTTCTGTTTGCACAT
RELA	hTFtarget	NW_012015244.1:18944122-18946122	1927	1938	+	11.3182	4.16e-05	0.117	AGGTGGTTTCCT
TBP	hTFtarget	NW_012015244.1:18944122-18946122	1334	1344	+	11.7976	4.16e-05	0.0991	CCTTTAAATGG
PROP1	database	NW_012015244.1:18944122-18946122	61	75	-	11.8738	4.16e-05	0.15	TAGCCATTAATATAT
FOXF2	database	NW_012015244.1:18944122-18946122	1287	1297	-	12.163	4.17e-05	0.15	TGTTTATATAA
IRF4	hTFtarget	NW_012015244.1:18944122-18946122	139	150	-	11.9756	4.17e-05	0.128	CACTTCTGCTTC
RELA	hTFtarget	NW_012015244.1:18944122-18946122	1927	1938	+	11.303	4.17e-05	0.109	AGGTGGTTTCCT
TP63	hTFtarget	NW_012015244.1:18944122-18946122	467	479	-	11.9848	4.17e-05	0.0828	CATGTGCAAACAG
E2F4	hTFtarget	NW_012015244.1:18944122-18946122	1583	1594	-	11.3947	4.17e-05	0.166	GGGGGGTGGAAC
FOXF2	database	NW_012015244.1:18944122-18946122	1287	1297	+	12.1584	4.17e-05	0.15	TTATATAAACA
PROP1	database	NW_012015244.1:18944122-18946122	61	75	-	11.8087	4.18e-05	0.151	TAGCCATTAATATAT
EBF1	database	NW_012015244.1:18944122-18946122	659	668	-	12.1798	4.18e-05	0.0828	CCCAAAGGGA
AR	hTFtarget	NW_012015244.1:18944122-18946122	1572	1587	-	11.7727	4.18e-05	0.0543	GGAACAAGCAGGGCCT
SPI1	hTFtarget	NW_012015244.1:18944122-18946122	601	624	-	9.7	4.18e-05	0.165	GACCTCTGGGTGATGGTGTAGCCT
CTCF	hTFtarget	NW_012015244.1:18944122-18946122	1936	1947	-	11.6053	4.18e-05	0.166	AGAACTGCAAGG
AR	hTFtarget	NW_012015244.1:18944122-18946122	468	479	+	12.0149	4.18e-05	0.0879	TGTTTGCACATG
GATA2	hTFtarget	NW_012015244.1:18944122-18946122	1954	1962	-	12.0571	4.19e-05	0.0828	CTTCCTTTT
GATA2	hTFtarget	NW_012015244.1:18944122-18946122	1954	1962	-	12	4.19e-05	0.0705	CTTCCTTTT
GTF2I	hTFtarget	NW_012015244.1:18944122-18946122	1903	1924	-	10.2105	4.19e-05	0.164	AGAGTCCCCAGGGCCTAAAGAG
NR2C2	hTFtarget	NW_012015244.1:18944122-18946122	1010	1031	-	10.8158	4.19e-05	0.166	CTCTGGACTCTACTTCACAGGG
AR	hTFtarget	NW_012015244.1:18944122-18946122	172	188	+	11.2254	4.19e-05	0.0781	GTCAACACCTGAGTACC
FOXP4	database	NW_012015244.1:18944122-18946122	750	764	+	12.4653	4.19e-05	0.0116	AAAAAAAAAAAAAAT
RARA	hTFtarget	NW_012015244.1:18944122-18946122	1969	1980	-	12.1857	4.2e-05	0.0829	AGTCAGGAAGCT
RELA	hTFtarget	NW_012015244.1:18944122-18946122	1346	1357	-	11.9474	4.2e-05	0.0663	CAAGAACTGACA
CDK8	hTFtarget	NW_012015244.1:18944122-18946122	1950	1961	-	11.9481	4.2e-05	0.157	TTCCTTTTATTT
PRAME	hTFtarget	NW_012015244.1:18944122-18946122	1410	1418	-	12.4079	4.21e-05	0.164	CCAATCGCA
BTAF1	hTFtarget	NW_012015244.1:18944122-18946122	1743	1758	-	11.4103	4.21e-05	0.0153	CATAGAAGAAAAAAAG
STAT1:STAT1	database	NW_012015244.1:18944122-18946122	875	887	-	11.1441	4.22e-05	0.165	ATTTACAAGAAGT
MYC	hTFtarget	NW_012015244.1:18944122-18946122	684	699	+	11.8077	4.22e-05	0.0405	ACTTCCTTCCCTTCCC
SPI1	hTFtarget	NW_012015244.1:18944122-18946122	606	621	+	11.6316	4.22e-05	0.0963	ACACCATCACCCAGAG
STAT1	hTFtarget	NW_012015244.1:18944122-18946122	602	623	+	9.67105	4.22e-05	0.167	GGCTACACCATCACCCAGAGGT
CREM	database	NW_012015244.1:18944122-18946122	1253	1263	-	11.8687	4.22e-05	0.168	TAATGACATCA
ESR1	hTFtarget	NW_012015244.1:18944122-18946122	1289	1297	+	12.3636	4.23e-05	0.11	ATATAAACA
ZBTB17	hTFtarget	NW_012015244.1:18944122-18946122	325	346	-	7.26316	4.23e-05	0.0529	TAATTATTCCCTCATTTTTTTT
EPAS1	hTFtarget	NW_012015244.1:18944122-18946122	1636	1647	+	11.9605	4.23e-05	0.168	CACTCAGCCAGG
EZH2	hTFtarget	NW_012015244.1:18944122-18946122	690	701	-	11.8732	4.24e-05	0.0812	CAGGGAAGGGAA
GATA3	hTFtarget	NW_012015244.1:18944122-18946122	1970	1978	-	12.2368	4.24e-05	0.101	TCAGGAAGC
OTX2	hTFtarget	NW_012015244.1:18944122-18946122	719	727	-	12.0526	4.24e-05	0.0562	ACCAGCAGG
SOX10	hTFtarget	NW_012015244.1:18944122-18946122	33	54	-	11.5606	4.24e-05	0.0778	TGAAACACTGCACTAATTCATC
FLI1	hTFtarget	NW_012015244.1:18944122-18946122	408	423	+	11.3947	4.25e-05	0.0494	CTTCTTACCCTCTGCC
NKX3-1	hTFtarget	NW_012015244.1:18944122-18946122	178	189	-	12.25	4.25e-05	0.0842	AGGTACTCAGGT
RELA	hTFtarget	NW_012015244.1:18944122-18946122	665	676	+	11.4848	4.25e-05	0.0829	TGGGAACCACCC
SP2	hTFtarget	NW_012015244.1:18944122-18946122	1579	1594	+	10.9605	4.25e-05	0.169	GCTTGTTCCACCCCCC
SPI1	hTFtarget	NW_012015244.1:18944122-18946122	1583	1598	+	11.3816	4.25e-05	0.169	GTTCCACCCCCCAGGC
HOXD10	database	NW_012015244.1:18944122-18946122	309	325	+	11.2857	4.26e-05	0.0762	GATGTAATAAAAACTGA
POU2F1	hTFtarget	NW_012015244.1:18944122-18946122	224	232	-	12	4.26e-05	0.166	ATTCCAGTC
RELA	hTFtarget	NW_012015244.1:18944122-18946122	665	676	+	11.4091	4.26e-05	0.0835	TGGGAACCACCC
SPI1	hTFtarget	NW_012015244.1:18944122-18946122	685	696	+	12.1857	4.26e-05	0.0681	CTTCCTTCCCTT
SPI1	hTFtarget	NW_012015244.1:18944122-18946122	482	498	-	9.77273	4.26e-05	0.0552	TAGCACTTCCAGTCTTC
NFIX	database	NW_012015244.1:18944122-18946122	948	962	-	9.70408	4.26e-05	0.169	TTGGCATATAGCAAG
EHF	database	NW_012015244.1:18944122-18946122	714	726	-	11.5455	4.27e-05	0.09	CCAGCAGGAAAGA
IRF2	hTFtarget	NW_012015244.1:18944122-18946122	461	472	-	12.0649	4.27e-05	0.156	AAACAGAAAGAA
OTX2	hTFtarget	NW_012015244.1:18944122-18946122	1066	1074	+	12.3158	4.27e-05	0.0848	CACAGCTGG
SPI1	hTFtarget	NW_012015244.1:18944122-18946122	689	700	+	11.9737	4.27e-05	0.0815	CTTCCCTTCCCT
ELF1	hTFtarget	NW_012015244.1:18944122-18946122	1968	1981	+	11.6061	4.27e-05	0.169	GAGCTTCCTGACTC
[truncated: 2,775 more rows]
