# Supplementary material for: Transcription Factor ZNF683 Inhibits SIV/HIV Replication through Regulating IFNγ Secretion of CD8+ T Cells
Source: Viruses. 2022 Mar 30;14(4):719. doi: 10.3390/v14040719 (PMC9030044; doi:10.3390/v14040719)
Supplement: Supplementary file 1 [file viruses-14-00719-s001.zip › Table S2.xlsx]

## Sheet: Sheet1
IRF5	hTFtarget	NC_000012.12:c68161740-68159740	4	25	-	30.7532	7.49e-14	2.96e-10	GGCGTGAGCCACCGCACCCGGC
GTF3C2	hTFtarget	NC_000012.12:c68161740-68159740	1081	1105	-	36.026	1.65e-13	5.32e-10	CATCTCTACTAAAAATACAAAAAAA
TRIM24	hTFtarget	NC_000012.12:c68161740-68159740	193	214	+	30.8026	1.41e-12	5.56e-09	CGGGAGGCTGAGGCGGGAGAAT
ZNF384	hTFtarget	NC_000012.12:c68161740-68159740	304	325	-	31.4861	1.46e-12	4.87e-09	TTTCTTTTTTTTTTTTTTTTTT
ZNF384	hTFtarget	NC_000012.12:c68161740-68159740	303	327	+	33.4167	1.58e-12	3.44e-09	AAAAAAAAAAAAAAAAAAAGAAATG
GTF3C2	hTFtarget	NC_000012.12:c68161740-68159740	44	65	-	29.3133	1.9e-12	7.49e-09	TGATCCGCCCGCCTTGGCCTCC
GLYR1	hTFtarget	NC_000012.12:c68161740-68159740	175	194	-	34.4342	2.06e-12	7.96e-09	CGAGTAGCTGGGACTACAGG
ZNF384	hTFtarget	NC_000012.12:c68161740-68159740	134	158	+	33.1111	2.5e-12	3.44e-09	AAAAAAAAAAAAAAAAAAAAATTAG
ZNF384	hTFtarget	NC_000012.12:c68161740-68159740	301	325	+	33.0139	2.81e-12	3.44e-09	AAAAAAAAAAAAAAAAAAAAAGAAA
TRIM24	hTFtarget	NC_000012.12:c68161740-68159740	142	163	+	25.359	4.44e-12	1.54e-08	AAAAAAAAAAAAATTAGCCGGG
ZNF384	hTFtarget	NC_000012.12:c68161740-68159740	301	322	-	30.9167	4.55e-12	4.87e-09	CTTTTTTTTTTTTTTTTTTTTT
POLR3A	hTFtarget	NC_000012.12:c68161740-68159740	38	59	-	29.9079	4.59e-12	1.82e-08	GCCCGCCTTGGCCTCCCAAAGT
ZNF384	hTFtarget	NC_000012.12:c68161740-68159740	132	153	-	30.8889	5.2e-12	4.87e-09	TTTTTTTTTTTTTTTTTTTTTT
ZNF384	hTFtarget	NC_000012.12:c68161740-68159740	133	154	-	30.8889	5.2e-12	4.87e-09	TTTTTTTTTTTTTTTTTTTTTT
GLYR1	hTFtarget	NC_000012.12:c68161740-68159740	1091	1110	-	31.506	5.43e-12	1.88e-08	AACCCCATCTCTACTAAAAA
ZNF384	hTFtarget	NC_000012.12:c68161740-68159740	302	326	+	32.4861	5.68e-12	5.22e-09	AAAAAAAAAAAAAAAAAAAAGAAAT
GLYR1	hTFtarget	NC_000012.12:c68161740-68159740	195	216	-	33.2895	5.97e-12	1.28e-08	CCATTCTCCCGCCTCAGCCTCC
GLYR1	hTFtarget	NC_000012.12:c68161740-68159740	1016	1037	+	33.1974	6.49e-12	1.28e-08	CCATTCTCCTGCCTCAGCCTCC
GLYR1	hTFtarget	NC_000012.12:c68161740-68159740	1066	1085	+	32.4211	8.52e-12	3.21e-08	ACCATGCCTGGCTAATTTTT
ZNF384	hTFtarget	NC_000012.12:c68161740-68159740	303	324	-	30.5833	9.41e-12	7.05e-09	TTCTTTTTTTTTTTTTTTTTTT
IRF5	hTFtarget	NC_000012.12:c68161740-68159740	1020	1038	+	30.6974	1.26e-11	3.2e-08	TCTCCTGCCTCAGCCTCCC
ZNF384	hTFtarget	NC_000012.12:c68161740-68159740	305	329	+	31.75	1.34e-11	9.12e-09	AAAAAAAAAAAAAAAAAGAAATGAC
ZNF384	hTFtarget	NC_000012.12:c68161740-68159740	132	156	+	31.6667	1.49e-11	9.12e-09	AAAAAAAAAAAAAAAAAAAAAAATT
IRF5	hTFtarget	NC_000012.12:c68161740-68159740	194	212	-	30.5789	1.65e-11	3.2e-08	TCTCCCGCCTCAGCCTCCC
ZNF384	hTFtarget	NC_000012.12:c68161740-68159740	302	323	-	30.1806	1.86e-11	1.16e-08	TCTTTTTTTTTTTTTTTTTTTT
SP2	hTFtarget	NC_000012.12:c68161740-68159740	1176	1196	-	22.0886	3.35e-11	1.13e-07	CACACCTGTAATCCCAGCACT
GTF3C2	hTFtarget	NC_000012.12:c68161740-68159740	295	319	+	30.5714	3.75e-11	6.04e-08	CGTCTCAAAAAAAAAAAAAAAAAAA
ZNF384	hTFtarget	NC_000012.12:c68161740-68159740	133	157	+	30.6528	4.33e-11	2.27e-08	AAAAAAAAAAAAAAAAAAAAAATTA
ZNF384	hTFtarget	NC_000012.12:c68161740-68159740	300	324	+	30.4306	5.39e-11	2.47e-08	CAAAAAAAAAAAAAAAAAAAAAGAA
KDM1A	hTFtarget	NC_000012.12:c68161740-68159740	192	213	+	26.2535	6.42e-11	2.51e-07	TCGGGAGGCTGAGGCGGGAGAA
ZNF384	hTFtarget	NC_000012.12:c68161740-68159740	134	155	-	28.9861	8.71e-11	4.47e-08	ATTTTTTTTTTTTTTTTTTTTT
ZNF384	hTFtarget	NC_000012.12:c68161740-68159740	306	327	-	28.9167	9.54e-11	4.47e-08	CATTTCTTTTTTTTTTTTTTTT
SP2	hTFtarget	NC_000012.12:c68161740-68159740	20	40	+	21.6709	1.08e-10	1.81e-07	CACGCCTGTAATCCCAGCACT
ZNF384	hTFtarget	NC_000012.12:c68161740-68159740	137	161	+	29.4861	1.28e-10	5.24e-08	AAAAAAAAAAAAAAAAAATTAGCCG
ZNF384	hTFtarget	NC_000012.12:c68161740-68159740	136	157	-	28.5833	1.38e-10	5.75e-08	TAATTTTTTTTTTTTTTTTTTT
GLYR1	hTFtarget	NC_000012.12:c68161740-68159740	44	65	-	29.2763	1.52e-10	2e-07	TGATCCGCCCGCCTTGGCCTCC
ZNF384	hTFtarget	NC_000012.12:c68161740-68159740	906	930	-	29.1944	1.66e-10	5.67e-08	AAAAAAAAAAAAGAAAAAAAGAAAA
GLYR1	hTFtarget	NC_000012.12:c68161740-68159740	24	43	-	29.1447	1.68e-10	2.16e-07	CAAAGTGCTGGGATTACAGG
GLYR1	hTFtarget	NC_000012.12:c68161740-68159740	1173	1192	+	29.1447	1.68e-10	2.16e-07	CAAAGTGCTGGGATTACAGG
ZNF384	hTFtarget	NC_000012.12:c68161740-68159740	131	155	+	29.1667	1.7e-10	5.67e-08	CAAAAAAAAAAAAAAAAAAAAAAAT
ZNF384	hTFtarget	NC_000012.12:c68161740-68159740	137	158	-	28.4028	1.71e-10	6.4e-08	CTAATTTTTTTTTTTTTTTTTT
TRIM24	hTFtarget	NC_000012.12:c68161740-68159740	175	190	+	24.7195	1.77e-10	6.94e-07	CCTGTAGTCCCAGCTA
ZNF384	hTFtarget	NC_000012.12:c68161740-68159740	907	931	-	29.0139	1.93e-10	5.91e-08	AAAAAAAAAAAAAGAAAAAAAGAAA
TRIM24	hTFtarget	NC_000012.12:c68161740-68159740	1018	1039	-	27.0921	2.01e-10	3.96e-07	AGGGAGGCTGAGGCAGGAGAAT
ZNF384	hTFtarget	NC_000012.12:c68161740-68159740	135	159	+	28.8889	2.14e-10	6.05e-08	AAAAAAAAAAAAAAAAAAAATTAGC
LMNB1	hTFtarget	NC_000012.12:c68161740-68159740	195	210	-	28.7805	2.17e-10	8.59e-07	TCCCGCCTCAGCCTCC
GTF3C2	hTFtarget	NC_000012.12:c68161740-68159740	194	209	-	26.6386	2.27e-10	5.24e-07	CCCGCCTCAGCCTCCC
IRF5	hTFtarget	NC_000012.12:c68161740-68159740	43	61	-	28.0789	2.35e-10	3.04e-07	CCGCCCGCCTTGGCCTCCC
ZNF384	hTFtarget	NC_000012.12:c68161740-68159740	136	160	+	28.6389	2.63e-10	6.91e-08	AAAAAAAAAAAAAAAAAAATTAGCC
ZNF384	hTFtarget	NC_000012.12:c68161740-68159740	135	156	-	27.8472	3.01e-10	1.03e-07	AATTTTTTTTTTTTTTTTTTTT
GTF3C2	hTFtarget	NC_000012.12:c68161740-68159740	43	58	-	26.2892	3.07e-10	5.24e-07	CCCGCCTTGGCCTCCC
GLYR1	hTFtarget	NC_000012.12:c68161740-68159740	1151	1172	+	28.2632	3.14e-10	3.1e-07	TGATCCACCCGCCTCAACCTCC
ZNF384	hTFtarget	NC_000012.12:c68161740-68159740	130	154	+	28.375	3.26e-10	7.82e-08	ACAAAAAAAAAAAAAAAAAAAAAAA
ZNF384	hTFtarget	NC_000012.12:c68161740-68159740	304	328	+	28.3194	3.4e-10	7.82e-08	AAAAAAAAAAAAAAAAAAGAAATGA
GTF3C2	hTFtarget	NC_000012.12:c68161740-68159740	1151	1172	+	25.5542	3.71e-10	6.08e-07	TGATCCACCCGCCTCAACCTCC
GTF3C2	hTFtarget	NC_000012.12:c68161740-68159740	1023	1038	+	26.2048	4.05e-10	5.24e-07	CCTGCCTCAGCCTCCC
GTF3C2	hTFtarget	NC_000012.12:c68161740-68159740	195	216	-	25.3614	4.62e-10	6.08e-07	CCATTCTCCCGCCTCAGCCTCC
GLYR1	hTFtarget	NC_000012.12:c68161740-68159740	150	169	-	27.7763	4.65e-10	8.77e-07	GCCACGCCCGGCTAATTTTT
TRIM24	hTFtarget	NC_000012.12:c68161740-68159740	42	63	+	26.2632	4.86e-10	6.38e-07	TGGGAGGCCAAGGCGGGCGGAT
ZNF384	hTFtarget	NC_000012.12:c68161740-68159740	910	931	+	27.2639	5.36e-10	1.5e-07	CTTTTTTTCTTTTTTTTTTTTT
GTF3C2	hTFtarget	NC_000012.12:c68161740-68159740	1123	1144	-	27.3	5.58e-10	2.21e-06	CAGGAGTTTGAGACCAGCCTAG
HDAC2	hTFtarget	NC_000012.12:c68161740-68159740	469	490	-	24.2857	5.66e-10	2.18e-06	CTCAGTCTCCTTACCTGTAAAA
ZNF384	hTFtarget	NC_000012.12:c68161740-68159740	909	930	+	27.1806	5.79e-10	1.5e-07	TCTTTTTTTCTTTTTTTTTTTT
ZNF384	hTFtarget	NC_000012.12:c68161740-68159740	307	328	-	27.1667	5.86e-10	1.5e-07	TCATTTCTTTTTTTTTTTTTTT
ZNF384	hTFtarget	NC_000012.12:c68161740-68159740	306	330	+	27.5972	5.95e-10	1.22e-07	AAAAAAAAAAAAAAAAGAAATGACT
ZNF384	hTFtarget	NC_000012.12:c68161740-68159740	903	927	-	27.5972	5.95e-10	1.22e-07	AAAAAAAAAGAAAAAAAGAAAAAAG
GTF2I	hTFtarget	NC_000012.12:c68161740-68159740	469	489	-	27.1711	6.07e-10	2.37e-06	TCAGTCTCCTTACCTGTAAAA
ZNF384	hTFtarget	NC_000012.12:c68161740-68159740	308	329	-	27.125	6.07e-10	1.5e-07	GTCATTTCTTTTTTTTTTTTTT
ZNF384	hTFtarget	NC_000012.12:c68161740-68159740	907	928	+	27.0694	6.4e-10	1.5e-07	TTTCTTTTTTTCTTTTTTTTTT
LMNB1	hTFtarget	NC_000012.12:c68161740-68159740	1022	1037	+	27.3537	6.6e-10	1.31e-06	TCCTGCCTCAGCCTCC
GLYR1	hTFtarget	NC_000012.12:c68161740-68159740	106	125	+	26.506	6.76e-10	1.17e-06	AACCCCGTCTGTACTAAAAA
ZNF384	hTFtarget	NC_000012.12:c68161740-68159740	307	331	+	27.3194	7.3e-10	1.37e-07	AAAAAAAAAAAAAAAGAAATGACTA
ZNF384	hTFtarget	NC_000012.12:c68161740-68159740	908	932	-	27.2917	7.45e-10	1.37e-07	CAAAAAAAAAAAAAGAAAAAAAGAA
TRIM24	hTFtarget	NC_000012.12:c68161740-68159740	1072	1093	-	22.5897	8.01e-10	1.38e-06	AAATACAAAAAAATTAGCCAGG
ZNF384	hTFtarget	NC_000012.12:c68161740-68159740	904	928	-	27	9.22e-10	1.61e-07	AAAAAAAAAAGAAAAAAAGAAAAAA
KDM1A	hTFtarget	NC_000012.12:c68161740-68159740	1019	1040	-	24.2535	9.45e-10	1.84e-06	TAGGGAGGCTGAGGCAGGAGAA
ZNF384	hTFtarget	NC_000012.12:c68161740-68159740	902	926	-	26.9306	9.69e-10	1.61e-07	AAAAAAAAGAAAAAAAGAAAAAAGG
ZNF384	hTFtarget	NC_000012.12:c68161740-68159740	138	162	+	26.875	1.01e-09	1.61e-07	AAAAAAAAAAAAAAAAATTAGCCGG
TRIM24	hTFtarget	NC_000012.12:c68161740-68159740	1153	1174	-	25.5263	1.02e-09	1e-06	TGGGAGGTTGAGGCGGGTGGAT
IRF5	hTFtarget	NC_000012.12:c68161740-68159740	132	147	+	27.1169	1.04e-09	2.73e-07	AAAAAAAAAAAAAAAA
IRF5	hTFtarget	NC_000012.12:c68161740-68159740	133	148	+	27.1169	1.04e-09	2.73e-07	AAAAAAAAAAAAAAAA
IRF5	hTFtarget	NC_000012.12:c68161740-68159740	134	149	+	27.1169	1.04e-09	2.73e-07	AAAAAAAAAAAAAAAA
IRF5	hTFtarget	NC_000012.12:c68161740-68159740	135	150	+	27.1169	1.04e-09	2.73e-07	AAAAAAAAAAAAAAAA
IRF5	hTFtarget	NC_000012.12:c68161740-68159740	136	151	+	27.1169	1.04e-09	2.73e-07	AAAAAAAAAAAAAAAA
IRF5	hTFtarget	NC_000012.12:c68161740-68159740	137	152	+	27.1169	1.04e-09	2.73e-07	AAAAAAAAAAAAAAAA
IRF5	hTFtarget	NC_000012.12:c68161740-68159740	138	153	+	27.1169	1.04e-09	2.73e-07	AAAAAAAAAAAAAAAA
IRF5	hTFtarget	NC_000012.12:c68161740-68159740	139	154	+	27.1169	1.04e-09	2.73e-07	AAAAAAAAAAAAAAAA
IRF5	hTFtarget	NC_000012.12:c68161740-68159740	301	316	+	27.1169	1.04e-09	2.73e-07	AAAAAAAAAAAAAAAA
IRF5	hTFtarget	NC_000012.12:c68161740-68159740	302	317	+	27.1169	1.04e-09	2.73e-07	AAAAAAAAAAAAAAAA
IRF5	hTFtarget	NC_000012.12:c68161740-68159740	303	318	+	27.1169	1.04e-09	2.73e-07	AAAAAAAAAAAAAAAA
IRF5	hTFtarget	NC_000012.12:c68161740-68159740	304	319	+	27.1169	1.04e-09	2.73e-07	AAAAAAAAAAAAAAAA
IRF5	hTFtarget	NC_000012.12:c68161740-68159740	305	320	+	27.1169	1.04e-09	2.73e-07	AAAAAAAAAAAAAAAA
IRF5	hTFtarget	NC_000012.12:c68161740-68159740	306	321	+	27.1169	1.04e-09	2.73e-07	AAAAAAAAAAAAAAAA
POLR3A	hTFtarget	NC_000012.12:c68161740-68159740	132	147	+	19.5769	1.04e-09	2.68e-07	AAAAAAAAAAAAAAAA
POLR3A	hTFtarget	NC_000012.12:c68161740-68159740	133	148	+	19.5769	1.04e-09	2.68e-07	AAAAAAAAAAAAAAAA
POLR3A	hTFtarget	NC_000012.12:c68161740-68159740	134	149	+	19.5769	1.04e-09	2.68e-07	AAAAAAAAAAAAAAAA
POLR3A	hTFtarget	NC_000012.12:c68161740-68159740	135	150	+	19.5769	1.04e-09	2.68e-07	AAAAAAAAAAAAAAAA
POLR3A	hTFtarget	NC_000012.12:c68161740-68159740	136	151	+	19.5769	1.04e-09	2.68e-07	AAAAAAAAAAAAAAAA
POLR3A	hTFtarget	NC_000012.12:c68161740-68159740	137	152	+	19.5769	1.04e-09	2.68e-07	AAAAAAAAAAAAAAAA
POLR3A	hTFtarget	NC_000012.12:c68161740-68159740	138	153	+	19.5769	1.04e-09	2.68e-07	AAAAAAAAAAAAAAAA
POLR3A	hTFtarget	NC_000012.12:c68161740-68159740	139	154	+	19.5769	1.04e-09	2.68e-07	AAAAAAAAAAAAAAAA
POLR3A	hTFtarget	NC_000012.12:c68161740-68159740	301	316	+	19.5769	1.04e-09	2.68e-07	AAAAAAAAAAAAAAAA
POLR3A	hTFtarget	NC_000012.12:c68161740-68159740	302	317	+	19.5769	1.04e-09	2.68e-07	AAAAAAAAAAAAAAAA
POLR3A	hTFtarget	NC_000012.12:c68161740-68159740	303	318	+	19.5769	1.04e-09	2.68e-07	AAAAAAAAAAAAAAAA
POLR3A	hTFtarget	NC_000012.12:c68161740-68159740	304	319	+	19.5769	1.04e-09	2.68e-07	AAAAAAAAAAAAAAAA
POLR3A	hTFtarget	NC_000012.12:c68161740-68159740	305	320	+	19.5769	1.04e-09	2.68e-07	AAAAAAAAAAAAAAAA
POLR3A	hTFtarget	NC_000012.12:c68161740-68159740	306	321	+	19.5769	1.04e-09	2.68e-07	AAAAAAAAAAAAAAAA
BTAF1	hTFtarget	NC_000012.12:c68161740-68159740	132	147	+	23.1282	1.04e-09	2.75e-07	AAAAAAAAAAAAAAAA
BTAF1	hTFtarget	NC_000012.12:c68161740-68159740	133	148	+	23.1282	1.04e-09	2.75e-07	AAAAAAAAAAAAAAAA
BTAF1	hTFtarget	NC_000012.12:c68161740-68159740	134	149	+	23.1282	1.04e-09	2.75e-07	AAAAAAAAAAAAAAAA
BTAF1	hTFtarget	NC_000012.12:c68161740-68159740	135	150	+	23.1282	1.04e-09	2.75e-07	AAAAAAAAAAAAAAAA
BTAF1	hTFtarget	NC_000012.12:c68161740-68159740	136	151	+	23.1282	1.04e-09	2.75e-07	AAAAAAAAAAAAAAAA
BTAF1	hTFtarget	NC_000012.12:c68161740-68159740	137	152	+	23.1282	1.04e-09	2.75e-07	AAAAAAAAAAAAAAAA
BTAF1	hTFtarget	NC_000012.12:c68161740-68159740	138	153	+	23.1282	1.04e-09	2.75e-07	AAAAAAAAAAAAAAAA
BTAF1	hTFtarget	NC_000012.12:c68161740-68159740	139	154	+	23.1282	1.04e-09	2.75e-07	AAAAAAAAAAAAAAAA
BTAF1	hTFtarget	NC_000012.12:c68161740-68159740	301	316	+	23.1282	1.04e-09	2.75e-07	AAAAAAAAAAAAAAAA
BTAF1	hTFtarget	NC_000012.12:c68161740-68159740	302	317	+	23.1282	1.04e-09	2.75e-07	AAAAAAAAAAAAAAAA
BTAF1	hTFtarget	NC_000012.12:c68161740-68159740	303	318	+	23.1282	1.04e-09	2.75e-07	AAAAAAAAAAAAAAAA
BTAF1	hTFtarget	NC_000012.12:c68161740-68159740	304	319	+	23.1282	1.04e-09	2.75e-07	AAAAAAAAAAAAAAAA
BTAF1	hTFtarget	NC_000012.12:c68161740-68159740	305	320	+	23.1282	1.04e-09	2.75e-07	AAAAAAAAAAAAAAAA
BTAF1	hTFtarget	NC_000012.12:c68161740-68159740	306	321	+	23.1282	1.04e-09	2.75e-07	AAAAAAAAAAAAAAAA
ZNF384	hTFtarget	NC_000012.12:c68161740-68159740	138	159	-	26.4444	1.13e-09	2.48e-07	GCTAATTTTTTTTTTTTTTTTT
ZNF384	hTFtarget	NC_000012.12:c68161740-68159740	308	332	+	26.5694	1.25e-09	1.91e-07	AAAAAAAAAAAAAAGAAATGACTAG
GTF3C2	hTFtarget	NC_000012.12:c68161740-68159740	1016	1037	+	24.4458	1.26e-09	1.25e-06	CCATTCTCCTGCCTCAGCCTCC
ZNF384	hTFtarget	NC_000012.12:c68161740-68159740	305	326	-	26.2639	1.3e-09	2.71e-07	ATTTCTTTTTTTTTTTTTTTTT
GTF3C2	hTFtarget	NC_000012.12:c68161740-68159740	913	937	-	25.974	1.39e-09	1.49e-06	CGTCTCAAAAAAAAAAAAAGAAAAA
TRIM24	hTFtarget	NC_000012.12:c68161740-68159740	24	39	+	23.2561	1.43e-09	1.87e-06	CCTGTAATCCCAGCAC
TRIM24	hTFtarget	NC_000012.12:c68161740-68159740	1177	1192	-	23.2561	1.43e-09	1.87e-06	CCTGTAATCCCAGCAC
ZNF384	hTFtarget	NC_000012.12:c68161740-68159740	131	152	-	26.1111	1.49e-09	2.78e-07	TTTTTTTTTTTTTTTTTTTTTG
ZNF384	hTFtarget	NC_000012.12:c68161740-68159740	300	321	-	26.1111	1.49e-09	2.78e-07	TTTTTTTTTTTTTTTTTTTTTG
IRF5	hTFtarget	NC_000012.12:c68161740-68159740	1056	1077	+	24.3506	1.62e-09	3.19e-06	GGCATACACCACCATGCCTGGC
IRF5	hTFtarget	NC_000012.12:c68161740-68159740	1155	1173	+	25.8684	1.64e-09	1.59e-06	CCACCCGCCTCAACCTCCC
IRF3	hTFtarget	NC_000012.12:c68161740-68159740	898	922	-	24.7436	1.82e-09	6.87e-06	AAAAGAAAAAAAGAAAAAAGGAAAG
GLYR1	hTFtarget	NC_000012.12:c68161740-68159740	1116	1135	+	25.4878	1.85e-09	7.31e-06	ATATTGGCTAGGCTGGTCTC
IRF5	hTFtarget	NC_000012.12:c68161740-68159740	307	322	+	25.2987	1.9e-09	4.63e-07	AAAAAAAAAAAAAAAG
BTAF1	hTFtarget	NC_000012.12:c68161740-68159740	309	324	+	21.9744	1.9e-09	4.38e-07	AAAAAAAAAAAAAGAA
BTAF1	hTFtarget	NC_000012.12:c68161740-68159740	916	931	-	21.9744	1.9e-09	4.38e-07	AAAAAAAAAAAAAGAA
ZNF384	hTFtarget	NC_000012.12:c68161740-68159740	130	151	-	25.8056	1.9e-09	3.39e-07	TTTTTTTTTTTTTTTTTTTTGT
ZNF384	hTFtarget	NC_000012.12:c68161740-68159740	139	163	+	25.8889	1.99e-09	2.92e-07	AAAAAAAAAAAAAAAATTAGCCGGG
ZNF384	hTFtarget	NC_000012.12:c68161740-68159740	898	922	-	25.7083	2.24e-09	3.17e-07	AAAAGAAAAAAAGAAAAAAGGAAAG
ZNF384	hTFtarget	NC_000012.12:c68161740-68159740	140	161	-	25.4028	2.63e-09	4.48e-07	CGGCTAATTTTTTTTTTTTTTT
BTAF1	hTFtarget	NC_000012.12:c68161740-68159740	307	322	+	21.9231	2.75e-09	5.98e-07	AAAAAAAAAAAAAAAG
ZNF384	hTFtarget	NC_000012.12:c68161740-68159740	908	929	+	25.2778	2.91e-09	4.75e-07	TTCTTTTTTTCTTTTTTTTTTT
GLYR1	hTFtarget	NC_000012.12:c68161740-68159740	1038	1057	+	24.9737	3.04e-09	2.93e-06	CTAGTAGCTGAGATTACAGG
ZNF384	hTFtarget	NC_000012.12:c68161740-68159740	905	926	+	24.875	3.95e-09	6.16e-07	TTTTTCTTTTTTTCTTTTTTTT
IRF5	hTFtarget	NC_000012.12:c68161740-68159740	140	155	+	25.013	3.98e-09	9.11e-07	AAAAAAAAAAAAAAAT
POLR3A	hTFtarget	NC_000012.12:c68161740-68159740	140	155	+	19.1154	3.98e-09	9.57e-07	AAAAAAAAAAAAAAAT
ZNF384	hTFtarget	NC_000012.12:c68161740-68159740	905	929	-	24.7778	4.07e-09	5.53e-07	AAAAAAAAAAAGAAAAAAAGAAAAA
IRF5	hTFtarget	NC_000012.12:c68161740-68159740	309	324	+	24.9481	4.84e-09	9.84e-07	AAAAAAAAAAAAAGAA
IRF5	hTFtarget	NC_000012.12:c68161740-68159740	916	931	-	24.9481	4.84e-09	9.84e-07	AAAAAAAAAAAAAGAA
ZNF384	hTFtarget	NC_000012.12:c68161740-68159740	911	932	+	24.4583	5.42e-09	8.13e-07	TTTTTTTCTTTTTTTTTTTTTG
TRIM24	hTFtarget	NC_000012.12:c68161740-68159740	1042	1057	-	22.3659	5.45e-09	5.34e-06	CCTGTAATCTCAGCTA
GTF3C2	hTFtarget	NC_000012.12:c68161740-68159740	1106	1121	+	23.8684	5.82e-09	2.27e-05	GGGTTTCACCATATTG
ZNF143	hTFtarget	NC_000012.12:c68161740-68159740	194	213	-	23.1571	5.97e-09	2.35e-05	TTCTCCCGCCTCAGCCTCCC
BTAF1	hTFtarget	NC_000012.12:c68161740-68159740	310	325	+	21.1923	6.36e-09	1.24e-06	AAAAAAAAAAAAGAAA
BTAF1	hTFtarget	NC_000012.12:c68161740-68159740	915	930	-	21.1923	6.36e-09	1.24e-06	AAAAAAAAAAAAGAAA
IRF5	hTFtarget	NC_000012.12:c68161740-68159740	308	323	+	24.5714	6.55e-09	1.26e-06	AAAAAAAAAAAAAAGA
GTF3C2	hTFtarget	NC_000012.12:c68161740-68159740	72	93	+	24.0714	6.57e-09	1.3e-05	CAGGAGATCGAGACCATCCTGA
GLYR1	hTFtarget	NC_000012.12:c68161740-68159740	290	309	+	23.7108	7.05e-09	8.14e-06	GACTCCGTCTCAAAAAAAAA
ZNF384	hTFtarget	NC_000012.12:c68161740-68159740	129	153	+	23.7778	7.44e-09	9.77e-07	CACAAAAAAAAAAAAAAAAAAAAAA
ERG	hTFtarget	NC_000012.12:c68161740-68159740	898	922	+	13.9342	7.62e-09	2.85e-05	CTTTCCTTTTTTCTTTTTTTCTTTT
SP2	hTFtarget	NC_000012.12:c68161740-68159740	1019	1037	+	23.4675	8.09e-09	3.17e-05	TTCTCCTGCCTCAGCCTCC
ZNF384	hTFtarget	NC_000012.12:c68161740-68159740	139	160	-	23.7917	8.7e-09	1.25e-06	GGCTAATTTTTTTTTTTTTTTT
BTAF1	hTFtarget	NC_000012.12:c68161740-68159740	911	926	-	21.141	8.93e-09	1.65e-06	AAAAAAAAGAAAAAAA
GTF2I	hTFtarget	NC_000012.12:c68161740-68159740	469	487	-	23.1842	9.43e-09	3.61e-05	AGTCTCCTTACCTGTAAAA
POLR3A	hTFtarget	NC_000012.12:c68161740-68159740	310	325	+	18.7051	1e-08	2.12e-06	AAAAAAAAAAAAGAAA
POLR3A	hTFtarget	NC_000012.12:c68161740-68159740	915	930	-	18.7051	1e-08	2.12e-06	AAAAAAAAAAAAGAAA
SP2	hTFtarget	NC_000012.12:c68161740-68159740	7	22	-	20.6316	1.05e-08	4.18e-05	GTGAGCCACCGCACCC
ZNF384	hTFtarget	NC_000012.12:c68161740-68159740	299	323	+	23.1667	1.06e-08	1.34e-06	TCAAAAAAAAAAAAAAAAAAAAAGA
IRF3	hTFtarget	NC_000012.12:c68161740-68159740	906	930	-	22.8718	1.11e-08	2.1e-05	AAAAAAAAAAAAGAAAAAAAGAAAA
ZNF384	hTFtarget	NC_000012.12:c68161740-68159740	140	164	+	22.9583	1.19e-08	1.46e-06	AAAAAAAAAAAAAAATTAGCCGGGC
IRF5	hTFtarget	NC_000012.12:c68161740-68159740	914	929	-	23.5325	1.21e-08	2.21e-06	AAAAAAAAAAAGAAAA
LMNB1	hTFtarget	NC_000012.12:c68161740-68159740	44	59	-	23.2439	1.23e-08	1.63e-05	GCCCGCCTTGGCCTCC
BTAF1	hTFtarget	NC_000012.12:c68161740-68159740	131	146	+	20.9615	1.24e-08	2.07e-06	CAAAAAAAAAAAAAAA
BTAF1	hTFtarget	NC_000012.12:c68161740-68159740	300	315	+	20.9615	1.24e-08	2.07e-06	CAAAAAAAAAAAAAAA
KDM1A	hTFtarget	NC_000012.12:c68161740-68159740	1154	1175	-	21.8592	1.29e-08	1.68e-05	TTGGGAGGTTGAGGCGGGTGGA
BTAF1	hTFtarget	NC_000012.12:c68161740-68159740	308	323	+	20.8846	1.43e-08	2.29e-06	AAAAAAAAAAAAAAGA
GTF3C2	hTFtarget	NC_000012.12:c68161740-68159740	1085	1106	-	20.8077	1.46e-08	4.79e-05	CCATCTCTACTAAAAATACAAA
IRF5	hTFtarget	NC_000012.12:c68161740-68159740	310	325	+	23.2857	1.48e-08	2.46e-06	AAAAAAAAAAAAGAAA
IRF5	hTFtarget	NC_000012.12:c68161740-68159740	915	930	-	23.2857	1.48e-08	2.46e-06	AAAAAAAAAAAAGAAA
ZNF384	hTFtarget	NC_000012.12:c68161740-68159740	901	922	+	23.0139	1.48e-08	2.06e-06	TCCTTTTTTCTTTTTTTCTTTT
ZNF143	hTFtarget	NC_000012.12:c68161740-68159740	1019	1038	+	22.1286	1.56e-08	3.07e-05	TTCTCCTGCCTCAGCCTCCC
ZNF384	hTFtarget	NC_000012.12:c68161740-68159740	309	330	-	22.875	1.63e-08	2.18e-06	AGTCATTTCTTTTTTTTTTTTT
IRF5	hTFtarget	NC_000012.12:c68161740-68159740	141	156	+	23.1818	1.69e-08	2.69e-06	AAAAAAAAAAAAAATT
ZNF384	hTFtarget	NC_000012.12:c68161740-68159740	309	333	+	22.3194	1.7e-08	2.01e-06	AAAAAAAAAAAAAGAAATGACTAGT
ZNF384	hTFtarget	NC_000012.12:c68161740-68159740	896	920	-	22.2222	1.79e-08	2.05e-06	AAGAAAAAAAGAAAAAAGGAAAGAA
ZNF384	hTFtarget	NC_000012.12:c68161740-68159740	299	320	-	22.6111	1.94e-08	2.5e-06	TTTTTTTTTTTTTTTTTTTTGA
GTF3C2	hTFtarget	NC_000012.12:c68161740-68159740	1158	1173	+	22.2169	1.95e-08	1.89e-05	CCCGCCTCAACCTCCC
BTAF1	hTFtarget	NC_000012.12:c68161740-68159740	140	155	+	20.5769	1.95e-08	2.99e-06	AAAAAAAAAAAAAAAT
ZNF384	hTFtarget	NC_000012.12:c68161740-68159740	904	925	+	22.4722	2.12e-08	2.64e-06	TTTTTTCTTTTTTTCTTTTTTT
BTAF1	hTFtarget	NC_000012.12:c68161740-68159740	130	145	+	20.2949	2.21e-08	3.26e-06	ACAAAAAAAAAAAAAA
KDM1A	hTFtarget	NC_000012.12:c68161740-68159740	41	62	+	21.1972	2.46e-08	2.4e-05	TTGGGAGGCCAAGGCGGGCGGA
ZNF384	hTFtarget	NC_000012.12:c68161740-68159740	901	925	-	21.5556	2.55e-08	2.84e-06	AAAAAAAGAAAAAAAGAAAAAAGGA
GTF3C2	hTFtarget	NC_000012.12:c68161740-68159740	21	42	+	20.2949	2.59e-08	4.79e-05	ACGCCTGTAATCCCAGCACTTT
POLR3A	database	NC_000012.12:c68161740-68159740	1130	1145	-	21.0909	2.84e-08	7.98e-05	TCAGGAGTTTGAGACC
ZNF92	hTFtarget	NC_000012.12:c68161740-68159740	904	928	+	21.4722	2.88e-08	0.000104	TTTTTTCTTTTTTTCTTTTTTTTTT
KDM5B	hTFtarget	NC_000012.12:c68161740-68159740	906	930	-	21.7308	2.97e-08	7.44e-05	AAAAAAAAAAAAGAAAAAAAGAAAA
IRF5	hTFtarget	NC_000012.12:c68161740-68159740	142	157	+	22.4156	3.09e-08	4.71e-06	AAAAAAAAAAAAATTA
ZNF384	hTFtarget	NC_000012.12:c68161740-68159740	909	933	-	21.0833	3.26e-08	3.52e-06	TCAAAAAAAAAAAAAGAAAAAAAGA
ZNF384	hTFtarget	NC_000012.12:c68161740-68159740	900	921	+	21.7778	3.28e-08	3.96e-06	TTCCTTTTTTCTTTTTTTCTTT
SP2	hTFtarget	NC_000012.12:c68161740-68159740	1017	1038	+	21.3117	3.32e-08	0.000112	CATTCTCCTGCCTCAGCCTCCC
ZNF384	hTFtarget	NC_000012.12:c68161740-68159740	310	334	+	20.9167	3.54e-08	3.72e-06	AAAAAAAAAAAAGAAATGACTAGTC
POLR3A	hTFtarget	NC_000012.12:c68161740-68159740	1157	1178	+	21.9868	3.56e-08	7.04e-05	ACCCGCCTCAACCTCCCAAAGT
ZNF143	hTFtarget	NC_000012.12:c68161740-68159740	1180	1193	-	20.0658	3.78e-08	0.00015	ACCTGTAATCCCAG
POLR3A	database	NC_000012.12:c68161740-68159740	71	86	+	20.7545	4.02e-08	7.98e-05	TCAGGAGATCGAGACC
ZNF384	hTFtarget	NC_000012.12:c68161740-68159740	895	919	-	20.5972	4.16e-08	4.25e-06	AGAAAAAAAGAAAAAAGGAAAGAAA
MYEF2	database	NC_000012.12:c68161740-68159740	112	133	+	20.4474	4.3e-08	0.000145	GTCTGTACTAAAAATAGCACAA
ZNF384	hTFtarget	NC_000012.12:c68161740-68159740	899	920	+	21.3333	4.3e-08	5.03e-06	TTTCCTTTTTTCTTTTTTTCTT
TRIM24	hTFtarget	NC_000012.12:c68161740-68159740	910	931	-	19.4103	4.36e-08	5.03e-05	AAAAAAAAAAAAAGAAAAAAAG
FLI1	hTFtarget	NC_000012.12:c68161740-68159740	897	921	-	9.23684	4.43e-08	0.000168	AAAGAAAAAAAGAAAAAAGGAAAGA
ZNF384	hTFtarget	NC_000012.12:c68161740-68159740	310	331	-	21.25	4.52e-08	5.13e-06	TAGTCATTTCTTTTTTTTTTTT
IRF3	hTFtarget	NC_000012.12:c68161740-68159740	900	924	-	21.2179	4.53e-08	5.69e-05	AAAAAAGAAAAAAAGAAAAAAGGAA
KDM5B	hTFtarget	NC_000012.12:c68161740-68159740	894	918	-	21.0385	5.25e-08	7.44e-05	GAAAAAAAGAAAAAAGGAAAGAAAT
IRF5	hTFtarget	NC_000012.12:c68161740-68159740	311	326	+	21.4286	5.3e-08	7.77e-06	AAAAAAAAAAAGAAAT
IRF5	hTFtarget	NC_000012.12:c68161740-68159740	26	37	-	21.5658	5.62e-08	0.000111	GCTGGGATTACA
IRF5	hTFtarget	NC_000012.12:c68161740-68159740	1179	1190	+	21.5658	5.62e-08	0.000111	GCTGGGATTACA
ZNF384	hTFtarget	NC_000012.12:c68161740-68159740	894	918	-	19.9583	5.7e-08	5.67e-06	GAAAAAAAGAAAAAAGGAAAGAAAT
ZNF384	hTFtarget	NC_000012.12:c68161740-68159740	141	162	-	20.8333	5.77e-08	6.37e-06	CCGGCTAATTTTTTTTTTTTTT
KDM5B	hTFtarget	NC_000012.12:c68161740-68159740	898	922	-	20.8846	5.94e-08	7.44e-05	AAAAGAAAAAAAGAAAAAAGGAAAG
ZNF384	hTFtarget	NC_000012.12:c68161740-68159740	912	933	+	20.7639	6.01e-08	6.44e-06	TTTTTTCTTTTTTTTTTTTTGA
POLR3A	hTFtarget	NC_000012.12:c68161740-68159740	1174	1189	-	18.6447	6.14e-08	0.000122	GTAATCCCAGCACTTT
POLR3A	hTFtarget	NC_000012.12:c68161740-68159740	27	42	+	18.6447	6.14e-08	0.000122	GTAATCCCAGCACTTT
ERG	hTFtarget	NC_000012.12:c68161740-68159740	902	926	+	6.93421	6.14e-08	9.83e-05	CCTTTTTTCTTTTTTTCTTTTTTTT
ZNF384	hTFtarget	NC_000012.12:c68161740-68159740	896	917	+	20.5139	6.94e-08	7.23e-06	TTCTTTCCTTTTTTCTTTTTTT
ZNF384	hTFtarget	NC_000012.12:c68161740-68159740	129	150	-	20.4306	7.28e-08	7.38e-06	TTTTTTTTTTTTTTTTTTTGTG
BTAF1	hTFtarget	NC_000012.12:c68161740-68159740	907	922	-	19.1923	7.62e-08	1.08e-05	AAAAGAAAAAAAGAAA
TRIM24	hTFtarget	NC_000012.12:c68161740-68159740	301	322	+	18.8846	7.67e-08	6.63e-05	AAAAAAAAAAAAAAAAAAAAAG
ZNF384	hTFtarget	NC_000012.12:c68161740-68159740	311	332	-	20.3194	7.76e-08	7.65e-06	CTAGTCATTTCTTTTTTTTTTT
ZNF384	hTFtarget	NC_000012.12:c68161740-68159740	141	165	+	19.3056	7.79e-08	7.54e-06	AAAAAAAAAAAAAATTAGCCGGGCG
ERG	hTFtarget	NC_000012.12:c68161740-68159740	894	918	+	6.03947	7.88e-08	9.83e-05	ATTTCTTTCCTTTTTTCTTTTTTTC
GLYR1	hTFtarget	NC_000012.12:c68161740-68159740	265	284	-	20.2195	8.06e-08	0.00016	CTGTCACCCAGGCTGGAGTG
SP2	hTFtarget	NC_000012.12:c68161740-68159740	43	64	-	20.2987	8.21e-08	0.000112	GATCCGCCCGCCTTGGCCTCCC
GLYR1	hTFtarget	NC_000012.12:c68161740-68159740	923	942	-	20.1446	8.43e-08	7.3e-05	GATTCCGTCTCAAAAAAAAA
SP2	hTFtarget	NC_000012.12:c68161740-68159740	1152	1173	+	20.2468	8.58e-08	0.000112	GATCCACCCGCCTCAACCTCCC
IRF3	hTFtarget	NC_000012.12:c68161740-68159740	899	923	-	20.3846	8.65e-08	6.52e-05	AAAAAGAAAAAAAGAAAAAAGGAAA
IRF3	hTFtarget	NC_000012.12:c68161740-68159740	904	928	-	20.3846	8.65e-08	6.52e-05	AAAAAAAAAAGAAAAAAAGAAAAAA
SP2	hTFtarget	NC_000012.12:c68161740-68159740	1081	1096	+	17.2639	9.54e-08	6.32e-05	TTTTTTTGTATTTTTA
KDM5B	hTFtarget	NC_000012.12:c68161740-68159740	904	928	-	20.2179	9.95e-08	8.8e-05	AAAAAAAAAAGAAAAAAAGAAAAAA
FLI1	hTFtarget	NC_000012.12:c68161740-68159740	893	917	-	6.52632	1.02e-07	0.000192	AAAAAAAGAAAAAAGGAAAGAAATA
IRF5	hTFtarget	NC_000012.12:c68161740-68159740	177	188	-	20.6579	1.02e-07	0.000135	GCTGGGACTACA
SMARCA4	hTFtarget	NC_000012.12:c68161740-68159740	913	928	-	18.1944	1.02e-07	0.000208	AAAAAAAAAAGAAAAA
BTAF1	hTFtarget	NC_000012.12:c68161740-68159740	914	929	-	19	1.02e-07	1.39e-05	AAAAAAAAAAAGAAAA
POLR3A	hTFtarget	NC_000012.12:c68161740-68159740	914	929	-	17.4615	1.06e-07	2.11e-05	AAAAAAAAAAAGAAAA
ZNF143	hTFtarget	NC_000012.12:c68161740-68159740	293	317	-	16.8333	1.09e-07	0.00033	TTTTTTTTTTTTTTTTTGAGACGGA
POLR3A	hTFtarget	NC_000012.12:c68161740-68159740	130	145	+	17.4487	1.11e-07	2.11e-05	ACAAAAAAAAAAAAAA
ZNF92	hTFtarget	NC_000012.12:c68161740-68159740	130	154	-	19.7222	1.11e-07	0.000155	TTTTTTTTTTTTTTTTTTTTTTTGT
LMNB1	hTFtarget	NC_000012.12:c68161740-68159740	1157	1172	+	19.7073	1.13e-07	0.000111	ACCCGCCTCAACCTCC
IRF5	hTFtarget	NC_000012.12:c68161740-68159740	913	928	-	20.1948	1.16e-07	1.61e-05	AAAAAAAAAAGAAAAA
KDM5B	hTFtarget	NC_000012.12:c68161740-68159740	900	924	-	20	1.17e-07	8.8e-05	AAAAAAGAAAAAAAGAAAAAAGGAA
IRF5	hTFtarget	NC_000012.12:c68161740-68159740	130	145	+	20.1558	1.19e-07	1.61e-05	ACAAAAAAAAAAAAAA
SP2	hTFtarget	NC_000012.12:c68161740-68159740	195	213	-	20.0519	1.19e-07	0.000233	TTCTCCCGCCTCAGCCTCC
BTAF1	hTFtarget	NC_000012.12:c68161740-68159740	910	925	-	18.8718	1.23e-07	1.62e-05	AAAAAAAGAAAAAAAG
ZNF384	hTFtarget	NC_000012.12:c68161740-68159740	893	917	-	18.2778	1.25e-07	1.18e-05	AAAAAAAGAAAAAAGGAAAGAAATA
IRF3	hTFtarget	NC_000012.12:c68161740-68159740	301	325	+	19.8462	1.29e-07	8.1e-05	AAAAAAAAAAAAAAAAAAAAAGAAA
ZNF92	hTFtarget	NC_000012.12:c68161740-68159740	301	325	-	19.5139	1.29e-07	0.000155	TTTCTTTTTTTTTTTTTTTTTTTTT
ZNF384	hTFtarget	NC_000012.12:c68161740-68159740	902	923	+	19.3889	1.3e-07	1.25e-05	CCTTTTTTCTTTTTTTCTTTTT
BTAF1	hTFtarget	NC_000012.12:c68161740-68159740	908	923	-	18.7949	1.31e-07	1.67e-05	AAAAAGAAAAAAAGAA
TRIM24	hTFtarget	NC_000012.12:c68161740-68159740	138	159	+	18.3462	1.34e-07	9.29e-05	AAAAAAAAAAAAAAAAATTAGC
FLI1	hTFtarget	NC_000012.12:c68161740-68159740	897	921	-	17.3182	1.35e-07	0.000511	AAAGAAAAAAAGAAAAAAGGAAAGA
BTAF1	hTFtarget	NC_000012.12:c68161740-68159740	913	928	-	18.7308	1.42e-07	1.71e-05	AAAAAAAAAAGAAAAA
BTAF1	hTFtarget	NC_000012.12:c68161740-68159740	917	932	-	18.7179	1.43e-07	1.71e-05	CAAAAAAAAAAAAAGA
RCOR1	hTFtarget	NC_000012.12:c68161740-68159740	465	486	-	18.3947	1.51e-07	0.000592	GTCTCCTTACCTGTAAAACTGG
EZH2	hTFtarget	NC_000012.12:c68161740-68159740	130	151	+	15.1512	1.57e-07	0.000366	ACAAAAAAAAAAAAAAAAAAAA
KDM5B	hTFtarget	NC_000012.12:c68161740-68159740	899	923	-	19.6026	1.57e-07	9.82e-05	AAAAAGAAAAAAAGAAAAAAGGAAA
SP2	hTFtarget	NC_000012.12:c68161740-68159740	194	215	-	19.5195	1.57e-07	0.000154	CATTCTCCCGCCTCAGCCTCCC
IRF3	hTFtarget	NC_000012.12:c68161740-68159740	905	929	-	19.5641	1.58e-07	8.46e-05	AAAAAAAAAAAGAAAAAAAGAAAAA
SP2	hTFtarget	NC_000012.12:c68161740-68159740	130	151	-	17.6026	1.61e-07	0.000264	TTTTTTTTTTTTTTTTTTTTGT
SUMO2	hTFtarget	NC_000012.12:c68161740-68159740	468	487	-	19.1558	1.66e-07	0.000624	AGTCTCCTTACCTGTAAAAC
ZNF143	hTFtarget	NC_000012.12:c68161740-68159740	1154	1173	+	19.2	1.75e-07	0.000215	TCCACCCGCCTCAACCTCCC
GTF3C2	hTFtarget	NC_000012.12:c68161740-68159740	34	55	+	19.4211	1.79e-07	0.000707	CAGCACTTTGGGAGGCCAAGGC
IRF3	hTFtarget	NC_000012.12:c68161740-68159740	907	931	-	19.3846	1.79e-07	8.46e-05	AAAAAAAAAAAAAGAAAAAAAGAAA
BTAF1	hTFtarget	NC_000012.12:c68161740-68159740	299	314	+	18.4744	1.89e-07	2.18e-05	TCAAAAAAAAAAAAAA
ZNF143	hTFtarget	NC_000012.12:c68161740-68159740	23	36	+	19.1053	1.89e-07	0.000374	GCCTGTAATCCCAG
ZNF143	hTFtarget	NC_000012.12:c68161740-68159740	130	154	-	16.4615	1.94e-07	0.00033	TTTTTTTTTTTTTTTTTTTTTTTGT
MYEF2	database	NC_000012.12:c68161740-68159740	112	133	+	19.5244	2e-07	0.000666	GTCTGTACTAAAAATAGCACAA
EZH2	hTFtarget	NC_000012.12:c68161740-68159740	299	320	+	15	2.02e-07	0.000366	TCAAAAAAAAAAAAAAAAAAAA
GTF3C2	hTFtarget	NC_000012.12:c68161740-68159740	111	135	+	17.974	2.02e-07	0.000163	CGTCTGTACTAAAAATAGCACAAAA
MEF2C	database	NC_000012.12:c68161740-68159740	116	130	+	17.9492	2.05e-07	0.00074	GTACTAAAAATAGCA
GTF2I	hTFtarget	NC_000012.12:c68161740-68159740	472	492	+	18.9474	2.06e-07	0.000803	TACAGGTAAGGAGACTGAGTC
POLR3A	hTFtarget	NC_000012.12:c68161740-68159740	20	36	+	19.1286	2.08e-07	0.000821	CACGCCTGTAATCCCAG
SMARCA4	hTFtarget	NC_000012.12:c68161740-68159740	1083	1098	-	17.6667	2.08e-07	0.000208	ACTAAAAATACAAAAA
IRF5	hTFtarget	NC_000012.12:c68161740-68159740	1044	1055	+	18.9342	2.17e-07	0.000215	GCTGAGATTACA
ZNF384	hTFtarget	NC_000012.12:c68161740-68159740	142	163	-	18.4028	2.18e-07	2.04e-05	CCCGGCTAATTTTTTTTTTTTT
POLR3A	hTFtarget	NC_000012.12:c68161740-68159740	311	326	+	17	2.19e-07	3.94e-05	AAAAAAAAAAAGAAAT
ZNF143	hTFtarget	NC_000012.12:c68161740-68159740	43	62	-	18.9	2.19e-07	0.000215	TCCGCCCGCCTTGGCCTCCC
IRF5	hTFtarget	NC_000012.12:c68161740-68159740	143	158	+	18.8312	2.32e-07	3.03e-05	AAAAAAAAAAAATTAG
TRIM24	hTFtarget	NC_000012.12:c68161740-68159740	302	323	+	17.7821	2.37e-07	0.000103	AAAAAAAAAAAAAAAAAAAAGA
IRF1	hTFtarget	NC_000012.12:c68161740-68159740	898	913	-	17.3896	2.39e-07	0.000886	AAAGAAAAAAGGAAAG
TRIM24	hTFtarget	NC_000012.12:c68161740-68159740	137	158	+	17.7436	2.47e-07	0.000103	AAAAAAAAAAAAAAAAAATTAG
ZNF384	hTFtarget	NC_000012.12:c68161740-68159740	900	924	-	16.7083	2.49e-07	2.25e-05	AAAAAAGAAAAAAAGAAAAAAGGAA
SP2	hTFtarget	NC_000012.12:c68161740-68159740	132	147	-	16.7778	2.5e-07	6.32e-05	TTTTTTTTTTTTTTTT
SP2	hTFtarget	NC_000012.12:c68161740-68159740	133	148	-	16.7778	2.5e-07	6.32e-05	TTTTTTTTTTTTTTTT
SP2	hTFtarget	NC_000012.12:c68161740-68159740	134	149	-	16.7778	2.5e-07	6.32e-05	TTTTTTTTTTTTTTTT
SP2	hTFtarget	NC_000012.12:c68161740-68159740	135	150	-	16.7778	2.5e-07	6.32e-05	TTTTTTTTTTTTTTTT
SP2	hTFtarget	NC_000012.12:c68161740-68159740	136	151	-	16.7778	2.5e-07	6.32e-05	TTTTTTTTTTTTTTTT
SP2	hTFtarget	NC_000012.12:c68161740-68159740	137	152	-	16.7778	2.5e-07	6.32e-05	TTTTTTTTTTTTTTTT
SP2	hTFtarget	NC_000012.12:c68161740-68159740	138	153	-	16.7778	2.5e-07	6.32e-05	TTTTTTTTTTTTTTTT
SP2	hTFtarget	NC_000012.12:c68161740-68159740	139	154	-	16.7778	2.5e-07	6.32e-05	TTTTTTTTTTTTTTTT
SP2	hTFtarget	NC_000012.12:c68161740-68159740	301	316	-	16.7778	2.5e-07	6.32e-05	TTTTTTTTTTTTTTTT
SP2	hTFtarget	NC_000012.12:c68161740-68159740	302	317	-	16.7778	2.5e-07	6.32e-05	TTTTTTTTTTTTTTTT
SP2	hTFtarget	NC_000012.12:c68161740-68159740	303	318	-	16.7778	2.5e-07	6.32e-05	TTTTTTTTTTTTTTTT
SP2	hTFtarget	NC_000012.12:c68161740-68159740	304	319	-	16.7778	2.5e-07	6.32e-05	TTTTTTTTTTTTTTTT
SP2	hTFtarget	NC_000012.12:c68161740-68159740	305	320	-	16.7778	2.5e-07	6.32e-05	TTTTTTTTTTTTTTTT
SP2	hTFtarget	NC_000012.12:c68161740-68159740	306	321	-	16.7778	2.5e-07	6.32e-05	TTTTTTTTTTTTTTTT
TRIM24	hTFtarget	NC_000012.12:c68161740-68159740	902	923	-	17.7308	2.5e-07	0.000103	AAAAAGAAAAAAAGAAAAAAGG
ZNF384	hTFtarget	NC_000012.12:c68161740-68159740	897	921	-	16.6806	2.52e-07	2.25e-05	AAAGAAAAAAAGAAAAAAGGAAAGA
FLI1	hTFtarget	NC_000012.12:c68161740-68159740	898	919	+	9.72857	2.56e-07	0.000972	CTTTCCTTTTTTCTTTTTTTCT
GTF3C2	hTFtarget	NC_000012.12:c68161740-68159740	95	110	-	18.6711	2.57e-07	0.000501	GGGTTTCACTGTGTTA
IRF3	hTFtarget	NC_000012.12:c68161740-68159740	303	327	+	18.859	2.58e-07	0.000108	AAAAAAAAAAAAAAAAAAAGAAATG
AIRE	database	NC_000012.12:c68161740-68159740	1323	1340	+	16.0112	2.59e-07	0.00098	TTGGGATATATTGGTTTA
AIRE	database	NC_000012.12:c68161740-68159740	1323	1340	+	15.9592	2.6e-07	0.000977	TTGGGATATATTGGTTTA
TRIM24	hTFtarget	NC_000012.12:c68161740-68159740	306	327	+	17.6538	2.69e-07	0.000103	AAAAAAAAAAAAAAAAGAAATG
BTAF1	hTFtarget	NC_000012.12:c68161740-68159740	909	924	-	18.0256	2.72e-07	3.05e-05	AAAAAAGAAAAAAAGA
SP2	hTFtarget	NC_000012.12:c68161740-68159740	134	155	-	17.1538	2.75e-07	0.000264	ATTTTTTTTTTTTTTTTTTTTT
KDM5B	hTFtarget	NC_000012.12:c68161740-68159740	680	695	-	18.2361	2.77e-07	0.00105	TTCTTTCTCCTCCTTT
ZNF92	hTFtarget	NC_000012.12:c68161740-68159740	907	931	+	18.4028	2.85e-07	0.000249	TTTCTTTTTTTCTTTTTTTTTTTTT
BTAF1	hTFtarget	NC_000012.12:c68161740-68159740	142	157	+	17.9872	2.86e-07	3.11e-05	AAAAAAAAAAAAATTA
SP2	hTFtarget	NC_000012.12:c68161740-68159740	132	153	-	17.0769	3e-07	0.000264	TTTTTTTTTTTTTTTTTTTTTT
SP2	hTFtarget	NC_000012.12:c68161740-68159740	133	154	-	17.0769	3e-07	0.000264	TTTTTTTTTTTTTTTTTTTTTT
BTAF1	hTFtarget	NC_000012.12:c68161740-68159740	141	156	+	17.9359	3.03e-07	3.2e-05	AAAAAAAAAAAAAATT
KDM5B	hTFtarget	NC_000012.12:c68161740-68159740	902	926	-	18.6538	3.05e-07	0.000141	AAAAAAAAGAAAAAAAGAAAAAAGG
POLR3A	hTFtarget	NC_000012.12:c68161740-68159740	907	922	-	16.7564	3.06e-07	5.25e-05	AAAAGAAAAAAAGAAA
SP2	hTFtarget	NC_000012.12:c68161740-68159740	720	735	-	16.6389	3.06e-07	7.25e-05	TTTTTATTTCTTTGTC
FLI1	hTFtarget	NC_000012.12:c68161740-68159740	894	918	+	-20.3333	3.07e-07	0.00118	ATTTCTTTCCTTTTTTCTTTTTTTC
ZNF384	hTFtarget	NC_000012.12:c68161740-68159740	897	918	+	17.6806	3.14e-07	2.87e-05	TCTTTCCTTTTTTCTTTTTTTC
GTF3C2	hTFtarget	NC_000012.12:c68161740-68159740	297	321	+	17.1169	3.2e-07	0.000206	TCTCAAAAAAAAAAAAAAAAAAAAA
BTAF1	hTFtarget	NC_000012.12:c68161740-68159740	903	918	-	17.8974	3.2e-07	3.28e-05	GAAAAAAAGAAAAAAG
ZNF143	hTFtarget	NC_000012.12:c68161740-68159740	1062	1077	-	18.4342	3.21e-07	0.00127	GCCAGGCATGGTGGTG
KDM5B	hTFtarget	NC_000012.12:c68161740-68159740	895	919	-	18.5385	3.3e-07	0.000141	AGAAAAAAAGAAAAAAGGAAAGAAA
SP2	hTFtarget	NC_000012.12:c68161740-68159740	913	928	+	16.5972	3.3e-07	7.35e-05	TTTTTCTTTTTTTTTT
ZEB1	database	NC_000012.12:c68161740-68159740	1412	1424	+	16.211	3.32e-07	0.00132	AATTTACCTGTGT
FLI1	hTFtarget	NC_000012.12:c68161740-68159740	894	918	+	-3.01429	3.35e-07	0.00128	ATTTCTTTCCTTTTTTCTTTTTTTC
KDM1A	hTFtarget	NC_000012.12:c68161740-68159740	465	489	+	16.5263	3.37e-07	0.00131	CCAGTTTTACAGGTAAGGAGACTGA
CDK9	hTFtarget	NC_000012.12:c68161740-68159740	907	922	-	17.1667	3.46e-07	0.000824	AAAAGAAAAAAAGAAA
ZNF92	hTFtarget	NC_000012.12:c68161740-68159740	905	929	+	18.125	3.46e-07	0.000249	TTTTTCTTTTTTTCTTTTTTTTTTT
KDM5B	hTFtarget	NC_000012.12:c68161740-68159740	896	920	-	18.4487	3.5e-07	0.000141	AAGAAAAAAAGAAAAAAGGAAAGAA
BRD4	hTFtarget	NC_000012.12:c68161740-68159740	891	915	-	18.2597	3.53e-07	0.000325	AAAAAGAAAAAAGGAAAGAAATACA
MEF2A	hTFtarget	NC_000012.12:c68161740-68159740	117	130	-	17.3731	3.58e-07	0.00124	TGCTATTTTTAGTA
ZNF143	hTFtarget	NC_000012.12:c68161740-68159740	122	146	-	16.0256	3.67e-07	0.00033	TTTTTTTTTTTTTTTGTGCTATTTT
SP2	hTFtarget	NC_000012.12:c68161740-68159740	909	924	+	16.5278	3.68e-07	7.74e-05	TCTTTTTTTCTTTTTT
EZH2	hTFtarget	NC_000012.12:c68161740-68159740	912	933	-	14.6163	3.73e-07	0.00045	TCAAAAAAAAAAAAAGAAAAAA
KDM5B	hTFtarget	NC_000012.12:c68161740-68159740	301	325	+	18.3462	3.75e-07	0.000141	AAAAAAAAAAAAAAAAAAAAAGAAA
ZNF384	hTFtarget	NC_000012.12:c68161740-68159740	312	336	+	15.7083	3.77e-07	3.26e-05	AAAAAAAAAAGAAATGACTAGTCAT
ZNF384	hTFtarget	NC_000012.12:c68161740-68159740	888	912	-	15.6806	3.81e-07	3.26e-05	AAGAAAAAAGGAAAGAAATACAGTG
BRD4	hTFtarget	NC_000012.12:c68161740-68159740	901	925	-	18.1558	3.87e-07	0.000325	AAAAAAAGAAAAAAAGAAAAAAGGA
IRF3	hTFtarget	NC_000012.12:c68161740-68159740	893	917	-	18.2308	3.93e-07	0.000148	AAAAAAAGAAAAAAGGAAAGAAATA
ZNF143	hTFtarget	NC_000012.12:c68161740-68159740	299	323	-	15.9744	3.94e-07	0.00033	TCTTTTTTTTTTTTTTTTTTTTTGA
IRF5	hTFtarget	NC_000012.12:c68161740-68159740	1191	1212	+	18.026	3.96e-07	0.000522	GGTGTGAGCCACTGCGTCTGGA
POLR3A	hTFtarget	NC_000012.12:c68161740-68159740	141	156	+	16.5769	3.97e-07	6.51e-05	AAAAAAAAAAAAAATT
BRD4	hTFtarget	NC_000012.12:c68161740-68159740	907	931	-	18.1169	4e-07	0.000325	AAAAAAAAAAAAAGAAAAAAAGAAA
FLI1	hTFtarget	NC_000012.12:c68161740-68159740	893	917	-	14.9697	4.08e-07	0.000552	AAAAAAAGAAAAAAGGAAAGAAATA
IRF5	hTFtarget	NC_000012.12:c68161740-68159740	909	924	-	17.5714	4.18e-07	5.28e-05	AAAAAAGAAAAAAAGA
SMARCA4	hTFtarget	NC_000012.12:c68161740-68159740	905	920	-	17.0694	4.22e-07	0.000208	AAGAAAAAAAGAAAAA
IRF4	database	NC_000012.12:c68161740-68159740	907	922	-	17.2871	4.23e-07	0.000568	AAAAGAAAAAAAGAAA
IRF4	database	NC_000012.12:c68161740-68159740	907	922	-	17.339	4.24e-07	0.000567	AAAAGAAAAAAAGAAA
SP2	hTFtarget	NC_000012.12:c68161740-68159740	303	324	-	16.7692	4.26e-07	0.000299	TTCTTTTTTTTTTTTTTTTTTT
BRD4	hTFtarget	NC_000012.12:c68161740-68159740	905	929	-	18.026	4.33e-07	0.000325	AAAAAAAAAAAGAAAAAAAGAAAAA
FLI1	hTFtarget	NC_000012.12:c68161740-68159740	901	925	-	14.8182	4.37e-07	0.000552	AAAAAAAGAAAAAAAGAAAAAAGGA
IRF4	database	NC_000012.12:c68161740-68159740	915	930	-	17.2881	4.48e-07	0.000567	AAAAAAAAAAAAGAAA
IRF4	database	NC_000012.12:c68161740-68159740	310	325	+	17.2881	4.48e-07	0.000567	AAAAAAAAAAAAGAAA
FLI1	hTFtarget	NC_000012.12:c68161740-68159740	901	925	-	1.35526	4.5e-07	0.000456	AAAAAAAGAAAAAAAGAAAAAAGGA
IRF4	database	NC_000012.12:c68161740-68159740	915	930	-	17.2277	4.5e-07	0.000568	AAAAAAAAAAAAGAAA
IRF4	database	NC_000012.12:c68161740-68159740	310	325	+	17.2277	4.5e-07	0.000568	AAAAAAAAAAAAGAAA
GLYR1	hTFtarget	NC_000012.12:c68161740-68159740	948	967	+	17.3293	4.55e-07	0.000601	CTGTCACCTAGGCTGGAGTG
GTF2I	hTFtarget	NC_000012.12:c68161740-68159740	1021	1036	+	16.7571	4.61e-07	0.00181	CTCCTGCCTCAGCCTC
MEF2A	database	NC_000012.12:c68161740-68159740	117	131	+	17.619	4.66e-07	0.00157	TACTAAAAATAGCAC
POLR3A	hTFtarget	NC_000012.12:c68161740-68159740	4	19	+	17.6286	4.68e-07	0.00186	GCCGGGTGCGGTGGCT
TRIM24	hTFtarget	NC_000012.12:c68161740-68159740	132	153	+	17.0769	4.68e-07	0.000147	AAAAAAAAAAAAAAAAAAAAAA
TRIM24	hTFtarget	NC_000012.12:c68161740-68159740	133	154	+	17.0769	4.68e-07	0.000147	AAAAAAAAAAAAAAAAAAAAAA
SIX5	hTFtarget	NC_000012.12:c68161740-68159740	1845	1865	+	17.6053	4.69e-07	0.00185	AACTACAACACCCAAATGCCA
POLR3A	hTFtarget	NC_000012.12:c68161740-68159740	299	314	+	16.4487	4.74e-07	7.42e-05	TCAAAAAAAAAAAAAA
IRF3	hTFtarget	NC_000012.12:c68161740-68159740	130	154	+	17.9231	4.8e-07	0.000165	ACAAAAAAAAAAAAAAAAAAAAAAA
BRD4	hTFtarget	NC_000012.12:c68161740-68159740	898	919	-	17.4615	4.8e-07	0.000976	AGAAAAAAAGAAAAAAGGAAAG
FLI1	hTFtarget	NC_000012.12:c68161740-68159740	1533	1557	-	1.10526	4.82e-07	0.000456	AAGCAAGGAAAGAATGCGGTTAAAA
ZNF384	hTFtarget	NC_000012.12:c68161740-68159740	890	914	-	15.0972	4.82e-07	4.02e-05	AAAAGAAAAAAGGAAAGAAATACAG
NOTCH1	hTFtarget	NC_000012.12:c68161740-68159740	1843	1858	+	16.2179	4.97e-07	0.00187	CTAACTACAACACCCA
ZNF384	hTFtarget	NC_000012.12:c68161740-68159740	893	914	+	16.7222	4.99e-07	4.45e-05	TATTTCTTTCCTTTTTTCTTTT
BRD4	hTFtarget	NC_000012.12:c68161740-68159740	899	923	-	17.8571	5e-07	0.000325	AAAAAGAAAAAAAGAAAAAAGGAAA
BRD4	hTFtarget	NC_000012.12:c68161740-68159740	897	921	-	17.8442	5.05e-07	0.000325	AAAGAAAAAAAGAAAAAAGGAAAGA
ZNF143	hTFtarget	NC_000012.12:c68161740-68159740	124	148	-	15.7949	5.05e-07	0.00033	TTTTTTTTTTTTTTTTTGTGCTATT
ZNF143	hTFtarget	NC_000012.12:c68161740-68159740	174	187	+	18.0921	5.13e-07	0.000678	GCCTGTAGTCCCAG
MYEF2	database	NC_000012.12:c68161740-68159740	112	133	+	15.3026	5.28e-07	0.00181	GTCTGTACTAAAAATAGCACAA
TRIM24	hTFtarget	NC_000012.12:c68161740-68159740	303	324	+	16.9487	5.28e-07	0.000152	AAAAAAAAAAAAAAAAAAAGAA
SP2	hTFtarget	NC_000012.12:c68161740-68159740	129	144	-	16.2917	5.31e-07	0.000106	TTTTTTTTTTTTTGTG
ZNF384	hTFtarget	NC_000012.12:c68161740-68159740	899	923	-	14.8472	5.32e-07	4.34e-05	AAAAAGAAAAAAAGAAAAAAGGAAA
CDK8	hTFtarget	NC_000012.12:c68161740-68159740	906	921	+	16.7403	5.38e-07	0.0011	TTTTCTTTTTTTCTTT
ZNF92	hTFtarget	NC_000012.12:c68161740-68159740	906	930	+	17.4444	5.48e-07	0.000329	TTTTCTTTTTTTCTTTTTTTTTTTT
BTAF1	hTFtarget	NC_000012.12:c68161740-68159740	918	933	-	17.2692	5.54e-07	5.53e-05	TCAAAAAAAAAAAAAG
E2F4	hTFtarget	NC_000012.12:c68161740-68159740	204	218	-	16.8939	5.59e-07	0.00222	CGCCATTCTCCCGCC
CDK8	hTFtarget	NC_000012.12:c68161740-68159740	914	929	+	16.6753	5.8e-07	0.0011	TTTTCTTTTTTTTTTT
SP2	hTFtarget	NC_000012.12:c68161740-68159740	44	62	-	17.5065	5.93e-07	0.000776	TCCGCCCGCCTTGGCCTCC
IRF5	hTFtarget	NC_000012.12:c68161740-68159740	1080	1095	-	16.7273	6.04e-07	7.37e-05	AAAAATACAAAAAAAT
ZNF143	hTFtarget	NC_000012.12:c68161740-68159740	1083	1107	+	15.6538	6.1e-07	0.00033	TTTTTGTATTTTTAGTAGAGATGGG
MEF2C	hTFtarget	NC_000012.12:c68161740-68159740	116	130	+	16.1194	6.13e-07	0.00216	GTACTAAAAATAGCA
ETS1	hTFtarget	NC_000012.12:c68161740-68159740	1846	1858	+	17.8714	6.28e-07	0.00249	ACTACAACACCCA
BRD4	hTFtarget	NC_000012.12:c68161740-68159740	895	919	-	17.5844	6.28e-07	0.000346	AGAAAAAAAGAAAAAAGGAAAGAAA
POLR2A	hTFtarget	NC_000012.12:c68161740-68159740	195	209	-	17.5263	6.29e-07	0.00249	CCCGCCTCAGCCTCC
SP2	hTFtarget	NC_000012.12:c68161740-68159740	1059	1074	+	17.2368	6.39e-07	0.00127	ATACACCACCATGCCT
ZNF143	hTFtarget	NC_000012.12:c68161740-68159740	911	935	+	15.6154	6.42e-07	0.00033	TTTTTTTCTTTTTTTTTTTTTGAGA
ERG	hTFtarget	NC_000012.12:c68161740-68159740	897	921	+	-2.01316	6.44e-07	0.000528	TCTTTCCTTTTTTCTTTTTTTCTTT
SP2	hTFtarget	NC_000012.12:c68161740-68159740	135	156	-	16.3846	6.5e-07	0.000326	AATTTTTTTTTTTTTTTTTTTT
SP2	hTFtarget	NC_000012.12:c68161740-68159740	305	326	-	16.3846	6.5e-07	0.000326	ATTTCTTTTTTTTTTTTTTTTT
IRF5	hTFtarget	NC_000012.12:c68161740-68159740	312	327	+	16.5455	6.63e-07	7.83e-05	AAAAAAAAAAGAAATG
ERG	hTFtarget	NC_000012.12:c68161740-68159740	895	910	+	16.1515	6.68e-07	0.0026	TTTCTTTCCTTTTTTC
ZBTB17	hTFtarget	NC_000012.12:c68161740-68159740	891	909	-	15.1184	6.78e-07	0.00256	AAAAAAGGAAAGAAATACA
ERG	hTFtarget	NC_000012.12:c68161740-68159740	898	913	+	17.6711	6.87e-07	0.00261	CTTTCCTTTTTTCTTT
IRF3	hTFtarget	NC_000012.12:c68161740-68159740	908	929	-	17.3662	6.89e-07	0.00142	AAAAAAAAAAAGAAAAAAAGAA
CDK9	hTFtarget	NC_000012.12:c68161740-68159740	915	930	-	16.5769	6.99e-07	0.000824	AAAAAAAAAAAAGAAA
CDK9	hTFtarget	NC_000012.12:c68161740-68159740	310	325	+	16.5769	6.99e-07	0.000824	AAAAAAAAAAAAGAAA
ZNF143	hTFtarget	NC_000012.12:c68161740-68159740	909	929	-	15.9487	7e-07	0.00162	AAAAAAAAAAAGAAAAAAAGA
KDM5B	hTFtarget	NC_000012.12:c68161740-68159740	907	931	-	17.3718	7.01e-07	0.000239	AAAAAAAAAAAAAGAAAAAAAGAAA
BRD4	hTFtarget	NC_000012.12:c68161740-68159740	908	929	-	17.0385	7.08e-07	0.000976	AAAAAAAAAAAGAAAAAAAGAA
ZNF92	hTFtarget	NC_000012.12:c68161740-68159740	302	326	-	17.0417	7.16e-07	0.000368	ATTTCTTTTTTTTTTTTTTTTTTTT
FLI1	hTFtarget	NC_000012.12:c68161740-68159740	898	922	+	-6.17143	7.25e-07	0.00138	CTTTCCTTTTTTCTTTTTTTCTTTT
MYBL2	hTFtarget	NC_000012.12:c68161740-68159740	1843	1864	-	17.2368	7.36e-07	0.00286	GGCATTTGGGTGTTGTAGTTAG
ZNF143	hTFtarget	NC_000012.12:c68161740-68159740	4	19	+	17.4079	7.38e-07	0.00146	GCCGGGTGCGGTGGCT
IRF3	hTFtarget	NC_000012.12:c68161740-68159740	899	914	-	16.961	7.39e-07	0.00279	AAAAGAAAAAAGGAAA
TBP	database	NC_000012.12:c68161740-68159740	1968	1978	+	12.6538	7.4e-07	0.00278	GGTATAAATAC
TBP	database	NC_000012.12:c68161740-68159740	1968	1978	+	12.6275	7.4e-07	0.00275	GGTATAAATAC
FLI1	hTFtarget	NC_000012.12:c68161740-68159740	1541	1560	+	-11.8788	7.44e-07	0.00286	GCATTCTTTCCTTGCTTTCT
BRD4	hTFtarget	NC_000012.12:c68161740-68159740	303	324	+	16.9487	7.68e-07	0.000976	AAAAAAAAAAAAAAAAAAAGAA
KDM5B	hTFtarget	NC_000012.12:c68161740-68159740	302	326	+	17.2179	7.71e-07	0.000241	AAAAAAAAAAAAAAAAAAAAGAAAT
MYEF2	database	NC_000012.12:c68161740-68159740	119	130	-	16.4257	7.8e-07	0.00278	TGCTATTTTTAG
SP2	hTFtarget	NC_000012.12:c68161740-68159740	308	323	-	16.0139	7.8e-07	0.000146	TCTTTTTTTTTTTTTT
ZNF76	hTFtarget	NC_000012.12:c68161740-68159740	1845	1864	+	16.5612	7.86e-07	0.00311	AACTACAACACCCAAATGCC
GATA1	hTFtarget	NC_000012.12:c68161740-68159740	355	370	+	13.4342	7.87e-07	0.00285	AATAAACTTTTATTAG
BTAF1	hTFtarget	NC_000012.12:c68161740-68159740	901	916	-	16.8718	8.01e-07	7.67e-05	AAAAAAGAAAAAAGGA
GTF3C2	hTFtarget	NC_000012.12:c68161740-68159740	110	131	+	16.7308	8.06e-07	0.000992	CCGTCTGTACTAAAAATAGCAC
BTAF1	hTFtarget	NC_000012.12:c68161740-68159740	900	915	-	16.859	8.11e-07	7.67e-05	AAAAAGAAAAAAGGAA
ZNF384	hTFtarget	NC_000012.12:c68161740-68159740	128	149	-	15.6667	8.11e-07	7.07e-05	TTTTTTTTTTTTTTTTTTGTGC
ZNF143	hTFtarget	NC_000012.12:c68161740-68159740	1845	1865	-	15.0455	8.25e-07	0.00326	TGGCATTTGGGTGTTGTAGTT
BRD4	hTFtarget	NC_000012.12:c68161740-68159740	301	325	+	17.2468	8.26e-07	0.000398	AAAAAAAAAAAAAAAAAAAAAGAAA
ERG	hTFtarget	NC_000012.12:c68161740-68159740	905	929	+	-3.06579	8.33e-07	0.000528	TTTTTCTTTTTTTCTTTTTTTTTTT
ZNF384	hTFtarget	NC_000012.12:c68161740-68159740	903	924	+	15.5972	8.37e-07	7.13e-05	CTTTTTTCTTTTTTTCTTTTTT
ERG	hTFtarget	NC_000012.12:c68161740-68159740	906	930	+	-3.13158	8.46e-07	0.000528	TTTTCTTTTTTTCTTTTTTTTTTTT
ZNF143	hTFtarget	NC_000012.12:c68161740-68159740	132	156	-	15.3846	8.67e-07	0.00039	AATTTTTTTTTTTTTTTTTTTTTTT
CDK9	hTFtarget	NC_000012.12:c68161740-68159740	913	928	-	16.3846	8.67e-07	0.000824	AAAAAAAAAAGAAAAA
SP2	hTFtarget	NC_000012.12:c68161740-68159740	915	930	+	15.9167	8.91e-07	0.000146	TTTCTTTTTTTTTTTT
SP2	hTFtarget	NC_000012.12:c68161740-68159740	310	325	-	15.9167	8.91e-07	0.000146	TTTCTTTTTTTTTTTT
EWSR1	hTFtarget	NC_000012.12:c68161740-68159740	1542	1557	-	9.04286	8.96e-07	0.00345	AAGCAAGGAAAGAATG
ZNF143	hTFtarget	NC_000012.12:c68161740-68159740	1846	1859	+	17.0714	9.03e-07	0.00356	ACTACAACACCCAA
FLI1	hTFtarget	NC_000012.12:c68161740-68159740	1544	1559	-	12.3143	9.05e-07	0.00345	GAAAGCAAGGAAAGAA
SIX5	hTFtarget	NC_000012.12:c68161740-68159740	1846	1858	-	16.4545	9.07e-07	0.0036	TGGGTGTTGTAGT
THAP11	hTFtarget	NC_000012.12:c68161740-68159740	1845	1859	-	16.9592	9.18e-07	0.00364	TTGGGTGTTGTAGTT
SP2	hTFtarget	NC_000012.12:c68161740-68159740	131	146	-	15.8889	9.25e-07	0.000146	TTTTTTTTTTTTTTTG
SP2	hTFtarget	NC_000012.12:c68161740-68159740	300	315	-	15.8889	9.25e-07	0.000146	TTTTTTTTTTTTTTTG
MEF2C	database	NC_000012.12:c68161740-68159740	117	129	+	18.2576	9.34e-07	0.00312	TACTAAAAATAGC
SP2	hTFtarget	NC_000012.12:c68161740-68159740	910	931	+	16.0385	9.38e-07	0.000391	CTTTTTTTCTTTTTTTTTTTTT
FLI1	hTFtarget	NC_000012.12:c68161740-68159740	1545	1560	-	13.6818	9.48e-07	0.00366	AGAAAGCAAGGAAAGA
ZNF92	hTFtarget	NC_000012.12:c68161740-68159740	123	147	-	16.5833	9.65e-07	0.000434	TTTTTTTTTTTTTTTTGTGCTATTT
MED1	hTFtarget	NC_000012.12:c68161740-68159740	907	922	+	16.1948	9.73e-07	0.00107	TTTCTTTTTTTCTTTT
MEF2A	hTFtarget	NC_000012.12:c68161740-68159740	117	132	-	16.791	9.78e-07	0.00331	TGTGCTATTTTTAGTA
IRF3	hTFtarget	NC_000012.12:c68161740-68159740	902	926	-	16.7436	9.97e-07	0.000313	AAAAAAAAGAAAAAAAGAAAAAAGG
NFYB	hTFtarget	NC_000012.12:c68161740-68159740	719	734	+	14.75	1e-06	0.0038	AGACAAAGAAATAAAA
SMARCA4	hTFtarget	NC_000012.12:c68161740-68159740	132	147	+	16.2778	1e-06	0.000208	AAAAAAAAAAAAAAAA
SMARCA4	hTFtarget	NC_000012.12:c68161740-68159740	133	148	+	16.2778	1e-06	0.000208	AAAAAAAAAAAAAAAA
SMARCA4	hTFtarget	NC_000012.12:c68161740-68159740	134	149	+	16.2778	1e-06	0.000208	AAAAAAAAAAAAAAAA
SMARCA4	hTFtarget	NC_000012.12:c68161740-68159740	135	150	+	16.2778	1e-06	0.000208	AAAAAAAAAAAAAAAA
SMARCA4	hTFtarget	NC_000012.12:c68161740-68159740	136	151	+	16.2778	1e-06	0.000208	AAAAAAAAAAAAAAAA
SMARCA4	hTFtarget	NC_000012.12:c68161740-68159740	137	152	+	16.2778	1e-06	0.000208	AAAAAAAAAAAAAAAA
SMARCA4	hTFtarget	NC_000012.12:c68161740-68159740	138	153	+	16.2778	1e-06	0.000208	AAAAAAAAAAAAAAAA
SMARCA4	hTFtarget	NC_000012.12:c68161740-68159740	139	154	+	16.2778	1e-06	0.000208	AAAAAAAAAAAAAAAA
SMARCA4	hTFtarget	NC_000012.12:c68161740-68159740	301	316	+	16.2778	1e-06	0.000208	AAAAAAAAAAAAAAAA
SMARCA4	hTFtarget	NC_000012.12:c68161740-68159740	302	317	+	16.2778	1e-06	0.000208	AAAAAAAAAAAAAAAA
SMARCA4	hTFtarget	NC_000012.12:c68161740-68159740	303	318	+	16.2778	1e-06	0.000208	AAAAAAAAAAAAAAAA
SMARCA4	hTFtarget	NC_000012.12:c68161740-68159740	304	319	+	16.2778	1e-06	0.000208	AAAAAAAAAAAAAAAA
SMARCA4	hTFtarget	NC_000012.12:c68161740-68159740	305	320	+	16.2778	1e-06	0.000208	AAAAAAAAAAAAAAAA
SMARCA4	hTFtarget	NC_000012.12:c68161740-68159740	306	321	+	16.2778	1e-06	0.000208	AAAAAAAAAAAAAAAA
SP2	hTFtarget	NC_000012.12:c68161740-68159740	136	157	-	15.9744	1e-06	0.000391	TAATTTTTTTTTTTTTTTTTTT
TBX2	database	NC_000012.12:c68161740-68159740	1181	1205	-	16.91	1.01e-06	0.00393	GCAGTGGCTCACACCTGTAATCCCA
BTAF1	hTFtarget	NC_000012.12:c68161740-68159740	902	917	-	16.6282	1.02e-06	9.45e-05	AAAAAAAGAAAAAAGG
TBX2	database	NC_000012.12:c68161740-68159740	1181	1205	+	16.8018	1.03e-06	0.00405	TGGGATTACAGGTGTGAGCCACTGC
IRF5	hTFtarget	NC_000012.12:c68161740-68159740	901	916	-	15.4026	1.04e-06	0.000119	AAAAAAGAAAAAAGGA
SP2	hTFtarget	NC_000012.12:c68161740-68159740	1154	1172	+	16.4805	1.06e-06	0.00104	TCCACCCGCCTCAACCTCC
GTF2I	hTFtarget	NC_000012.12:c68161740-68159740	471	492	+	16.5132	1.07e-06	0.00421	TTACAGGTAAGGAGACTGAGTC
MED1	hTFtarget	NC_000012.12:c68161740-68159740	899	914	+	16.0779	1.1e-06	0.00107	TTTCCTTTTTTCTTTT
BRD4	hTFtarget	NC_000012.12:c68161740-68159740	130	154	+	16.8831	1.1e-06	0.000472	ACAAAAAAAAAAAAAAAAAAAAAAA
POLR3A	hTFtarget	NC_000012.12:c68161740-68159740	308	323	+	15.7564	1.11e-06	0.000166	AAAAAAAAAAAAAAGA
BTAF1	hTFtarget	NC_000012.12:c68161740-68159740	143	158	+	16.5385	1.11e-06	0.0001	AAAAAAAAAAAATTAG
IRF3	hTFtarget	NC_000012.12:c68161740-68159740	894	915	-	16.662	1.12e-06	0.00142	AAAAAGAAAAAAGGAAAGAAAT
KDM5B	hTFtarget	NC_000012.12:c68161740-68159740	903	927	-	16.5769	1.13e-06	0.000328	AAAAAAAAAGAAAAAAAGAAAAAAG
MED1	hTFtarget	NC_000012.12:c68161740-68159740	915	930	+	16.0519	1.14e-06	0.00107	TTTCTTTTTTTTTTTT
MED1	hTFtarget	NC_000012.12:c68161740-68159740	310	325	-	16.0519	1.14e-06	0.00107	TTTCTTTTTTTTTTTT
ERG	hTFtarget	NC_000012.12:c68161740-68159740	890	914	+	-4.44737	1.16e-06	0.000544	CTGTATTTCTTTCCTTTTTTCTTTT
ERG	hTFtarget	NC_000012.12:c68161740-68159740	901	925	+	-4.46053	1.16e-06	0.000544	TCCTTTTTTCTTTTTTTCTTTTTTT
GTF3C2	hTFtarget	NC_000012.12:c68161740-68159740	1174	1195	-	16.2821	1.18e-06	0.00109	ACACCTGTAATCCCAGCACTTT
ZNF92	hTFtarget	NC_000012.12:c68161740-68159740	131	155	-	16.2639	1.18e-06	0.000473	ATTTTTTTTTTTTTTTTTTTTTTTG
GTF2I	hTFtarget	NC_000012.12:c68161740-68159740	465	484	-	14.8684	1.19e-06	0.0047	CTCCTTACCTGTAAAACTGG
IRF1	hTFtarget	NC_000012.12:c68161740-68159740	898	913	+	16.0779	1.19e-06	0.00431	CTTTCCTTTTTTCTTT
FOXP4	database	NC_000012.12:c68161740-68159740	309	323	+	14.9406	1.19e-06	0.00222	AAAAAAAAAAAAAGA
FOXP4	database	NC_000012.12:c68161740-68159740	917	931	-	14.9406	1.19e-06	0.00222	AAAAAAAAAAAAAGA
MEF2A	hTFtarget	NC_000012.12:c68161740-68159740	117	132	+	15.791	1.21e-06	0.00418	TACTAAAAATAGCACA
BTAF1	hTFtarget	NC_000012.12:c68161740-68159740	311	326	+	16.4487	1.21e-06	0.000106	AAAAAAAAAAAGAAAT
FLI1	hTFtarget	NC_000012.12:c68161740-68159740	900	921	+	14.1515	1.22e-06	0.00367	TTCCTTTTTTCTTTTTTTCTTT
EWSR1	hTFtarget	NC_000012.12:c68161740-68159740	1536	1560	-	0.212121	1.22e-06	0.00467	AGAAAGCAAGGAAAGAATGCGGTTA
IRF3	hTFtarget	NC_000012.12:c68161740-68159740	128	152	+	16.3974	1.22e-06	0.000355	GCACAAAAAAAAAAAAAAAAAAAAA
MEF2A	database	NC_000012.12:c68161740-68159740	118	131	-	16.6753	1.23e-06	0.00419	GTGCTATTTTTAGT
ZNF384	hTFtarget	NC_000012.12:c68161740-68159740	312	333	-	14.6806	1.25e-06	0.000104	ACTAGTCATTTCTTTTTTTTTT
KLF4	hTFtarget	NC_000012.12:c68161740-68159740	158	169	+	16.1429	1.26e-06	0.005	GCCGGGCGTGGC
MEF2A	database	NC_000012.12:c68161740-68159740	116	131	-	17.1333	1.27e-06	0.00427	GTGCTATTTTTAGTAC
BRD4	hTFtarget	NC_000012.12:c68161740-68159740	904	925	-	16.3718	1.27e-06	0.0012	AAAAAAAGAAAAAAAGAAAAAA
SP2	hTFtarget	NC_000012.12:c68161740-68159740	299	320	-	15.7179	1.3e-06	0.000458	TTTTTTTTTTTTTTTTTTTTGA
GLYR1	hTFtarget	NC_000012.12:c68161740-68159740	81	100	-	15.3902	1.32e-06	0.0013	GTGTTAATCAGGATGGTCTC
EP300	hTFtarget	NC_000012.12:c68161740-68159740	1209	1224	-	16.2632	1.32e-06	0.00526	CCCAGGGGGAGTTCCA
ETS1	hTFtarget	NC_000012.12:c68161740-68159740	1846	1859	+	16.5714	1.34e-06	0.00531	ACTACAACACCCAA
FLI1	hTFtarget	NC_000012.12:c68161740-68159740	1542	1563	+	4.45714	1.34e-06	0.00255	CATTCTTTCCTTGCTTTCTGGT
THAP11	hTFtarget	NC_000012.12:c68161740-68159740	1844	1865	+	13.1364	1.34e-06	0.00531	TAACTACAACACCCAAATGCCA
ZNF384	hTFtarget	NC_000012.12:c68161740-68159740	906	927	+	14.5278	1.34e-06	0.000109	TTTTCTTTTTTTCTTTTTTTTT
FLI1	hTFtarget	NC_000012.12:c68161740-68159740	1545	1560	-	15.8209	1.35e-06	0.00504	AGAAAGCAAGGAAAGA
BTAF1	hTFtarget	NC_000012.12:c68161740-68159740	905	920	-	16.2949	1.35e-06	0.000116	AAGAAAAAAAGAAAAA
TRIM24	hTFtarget	NC_000012.12:c68161740-68159740	305	326	+	15.8974	1.36e-06	0.000362	AAAAAAAAAAAAAAAAAGAAAT
IRF4	database	NC_000012.12:c68161740-68159740	899	914	-	16.1782	1.36e-06	0.00094	AAAAGAAAAAAGGAAA
IRF4	database	NC_000012.12:c68161740-68159740	899	914	-	16.2203	1.37e-06	0.000935	AAAAGAAAAAAGGAAA
ZNF143	hTFtarget	NC_000012.12:c68161740-68159740	305	325	+	15.3333	1.38e-06	0.00162	AAAAAAAAAAAAAAAAAGAAA
RARB	database	NC_000012.12:c68161740-68159740	67	77	+	14.9898	1.39e-06	0.00555	GAGGTCAGGAG
IRF5	hTFtarget	NC_000012.12:c68161740-68159740	911	926	-	14.6364	1.39e-06	0.000143	AAAAAAAAGAAAAAAA
RARB	database	NC_000012.12:c68161740-68159740	67	77	-	14.9898	1.39e-06	0.00555	CTCCTGACCTC
FLI1	hTFtarget	NC_000012.12:c68161740-68159740	1538	1562	+	-8.98571	1.4e-06	0.00139	ACCGCATTCTTTCCTTGCTTTCTGG
IRF5	hTFtarget	NC_000012.12:c68161740-68159740	912	927	-	14.6234	1.4e-06	0.000143	AAAAAAAAAGAAAAAA
ETS1	hTFtarget	NC_000012.12:c68161740-68159740	1846	1857	+	16.7714	1.41e-06	0.00558	ACTACAACACCC
IRF5	hTFtarget	NC_000012.12:c68161740-68159740	131	146	+	14.5974	1.41e-06	0.000143	CAAAAAAAAAAAAAAA
IRF5	hTFtarget	NC_000012.12:c68161740-68159740	300	315	+	14.5974	1.41e-06	0.000143	CAAAAAAAAAAAAAAA
MEF2A	database	NC_000012.12:c68161740-68159740	119	130	-	17.0808	1.42e-06	0.00494	TGCTATTTTTAG
ETS1	hTFtarget	NC_000012.12:c68161740-68159740	1846	1857	+	16.5714	1.42e-06	0.00562	ACTACAACACCC
FLI1	hTFtarget	NC_000012.12:c68161740-68159740	896	920	-	12.0909	1.45e-06	0.00134	AAGAAAAAAAGAAAAAAGGAAAGAA
GTF3C2	hTFtarget	NC_000012.12:c68161740-68159740	911	935	-	14.1429	1.45e-06	0.000778	TCTCAAAAAAAAAAAAAGAAAAAAA
TFDP1	hTFtarget	NC_000012.12:c68161740-68159740	203	218	-	16.4605	1.47e-06	0.00583	CGCCATTCTCCCGCCT
ZNF384	hTFtarget	NC_000012.12:c68161740-68159740	311	335	+	12.1528	1.47e-06	0.000117	AAAAAAAAAAAGAAATGACTAGTCA
IRF3	hTFtarget	NC_000012.12:c68161740-68159740	303	324	+	16.2394	1.49e-06	0.00142	AAAAAAAAAAAAAAAAAAAGAA
IRF3	hTFtarget	NC_000012.12:c68161740-68159740	910	931	-	16.2254	1.5e-06	0.00142	AAAAAAAAAAAAAGAAAAAAAG
SMAD4	hTFtarget	NC_000012.12:c68161740-68159740	885	909	-	15.7792	1.5e-06	0.00559	AAAAAAGGAAAGAAATACAGTGTAT
STAT4	database	NC_000012.12:c68161740-68159740	1759	1772	+	16.2679	1.51e-06	0.00563	TTCAAAGAATCCCA
YY1	hTFtarget	NC_000012.12:c68161740-68159740	187	208	-	15.0921	1.51e-06	0.00597	CCGCCTCAGCCTCCCGAGTAGC
EP300	hTFtarget	NC_000012.12:c68161740-68159740	482	496	-	15.8286	1.51e-06	0.00598	CTATGACTCAGTCTC
SP2	hTFtarget	NC_000012.12:c68161740-68159740	908	929	+	15.5641	1.52e-06	0.000486	TTCTTTTTTTCTTTTTTTTTTT
ZNF143	hTFtarget	NC_000012.12:c68161740-68159740	131	155	-	14.9231	1.54e-06	0.000614	ATTTTTTTTTTTTTTTTTTTTTTTG
IRF3	hTFtarget	NC_000012.12:c68161740-68159740	908	932	-	15.9744	1.56e-06	0.00042	CAAAAAAAAAAAAAGAAAAAAAGAA
POLR3A	hTFtarget	NC_000012.12:c68161740-68159740	309	324	+	15.4615	1.56e-06	0.000217	AAAAAAAAAAAAAGAA
POLR3A	hTFtarget	NC_000012.12:c68161740-68159740	916	931	-	15.4615	1.56e-06	0.000217	AAAAAAAAAAAAAGAA
TRIM24	hTFtarget	NC_000012.12:c68161740-68159740	906	927	-	15.7051	1.61e-06	0.000397	AAAAAAAAAGAAAAAAAGAAAA
IRF5	hTFtarget	NC_000012.12:c68161740-68159740	144	159	+	14.2857	1.62e-06	0.00016	AAAAAAAAAAATTAGC
ZNF384	hTFtarget	NC_000012.12:c68161740-68159740	298	322	+	11.875	1.62e-06	0.000127	CTCAAAAAAAAAAAAAAAAAAAAAG
MED1	hTFtarget	NC_000012.12:c68161740-68159740	906	921	+	15.7403	1.64e-06	0.00248	TTTTCTTTTTTTCTTT
MED1	hTFtarget	NC_000012.12:c68161740-68159740	906	921	-	15.9221	1.64e-06	0.00319	AAAGAAAAAAAGAAAA
SP2	hTFtarget	NC_000012.12:c68161740-68159740	907	922	+	15.4306	1.64e-06	0.000249	TTTCTTTTTTTCTTTT
TRIM24	hTFtarget	NC_000012.12:c68161740-68159740	225	246	+	15.6711	1.64e-06	0.00129	CGGGAGGCAGAGCTTGCAGTGA
TBX5	database	NC_000012.12:c68161740-68159740	1189	1198	-	17.5688	1.65e-06	0.00625	CTCACACCTG
SMARCA4	hTFtarget	NC_000012.12:c68161740-68159740	308	323	+	15.7639	1.67e-06	0.000328	AAAAAAAAAAAAAAGA
GRHL2	hTFtarget	NC_000012.12:c68161740-68159740	463	478	-	15.9848	1.68e-06	0.00666	ACCTGTAAAACTGGCT
FLI1	hTFtarget	NC_000012.12:c68161740-68159740	890	914	+	-9.8	1.69e-06	0.00139	CTGTATTTCTTTCCTTTTTTCTTTT
BRD4	hTFtarget	NC_000012.12:c68161740-68159740	896	917	-	16.0256	1.7e-06	0.0012	AAAAAAAGAAAAAAGGAAAGAA
IRF3	hTFtarget	NC_000012.12:c68161740-68159740	897	921	-	15.8077	1.71e-06	0.000431	AAAGAAAAAAAGAAAAAAGGAAAGA
SP2	hTFtarget	NC_000012.12:c68161740-68159740	254	269	+	16.1184	1.71e-06	0.00171	TTGCGCCACTGCACTC
ZNF143	hTFtarget	NC_000012.12:c68161740-68159740	1846	1859	+	15.9242	1.72e-06	0.00681	ACTACAACACCCAA
POLR2A	hTFtarget	NC_000012.12:c68161740-68159740	193	208	-	16.0526	1.73e-06	0.00683	CCGCCTCAGCCTCCCG
SP2	hTFtarget	NC_000012.12:c68161740-68159740	963	978	-	16.1053	1.73e-06	0.00171	TCGCGCCACTACACTC
SP2	hTFtarget	NC_000012.12:c68161740-68159740	906	927	+	15.4359	1.73e-06	0.000505	TTTTCTTTTTTTCTTTTTTTTT
POLR3A	hTFtarget	NC_000012.12:c68161740-68159740	1080	1095	-	15.359	1.75e-06	0.000234	AAAAATACAAAAAAAT
FLI1	hTFtarget	NC_000012.12:c68161740-68159740	900	924	-	11.6212	1.77e-06	0.00134	AAAAAAGAAAAAAAGAAAAAAGGAA
EBF1	database	NC_000012.12:c68161740-68159740	1212	1225	-	15.1798	1.78e-06	0.00706	TCCCAGGGGGAGTT
CEBPB	hTFtarget	NC_000012.12:c68161740-68159740	252	265	-	15.2273	1.79e-06	0.00678	GCAGTGGCGCAATC
CEBPD	hTFtarget	NC_000012.12:c68161740-68159740	252	263	+	15.4143	1.79e-06	0.00701	GATTGCGCCACT
ZNF92	hTFtarget	NC_000012.12:c68161740-68159740	899	923	+	15.5694	1.83e-06	0.000659	TTTCCTTTTTTCTTTTTTTCTTTTT
TP53	hTFtarget	NC_000012.12:c68161740-68159740	1896	1911	-	14.9706	1.85e-06	0.00716	GACAGATAGGCAGGGA
FLI1	hTFtarget	NC_000012.12:c68161740-68159740	897	921	+	-10.2286	1.86e-06	0.00139	TCTTTCCTTTTTTCTTTTTTTCTTT
GTF3C2	hTFtarget	NC_000012.12:c68161740-68159740	294	315	+	15.7179	1.86e-06	0.00138	CCGTCTCAAAAAAAAAAAAAAA
POLR3A	hTFtarget	NC_000012.12:c68161740-68159740	912	927	-	15.3077	1.86e-06	0.000239	AAAAAAAAAGAAAAAA
FLI1	hTFtarget	NC_000012.12:c68161740-68159740	1546	1561	-	15.7103	1.88e-06	0.00721	CAGAAAGCAAGGAAAG
HCFC1	hTFtarget	NC_000012.12:c68161740-68159740	1846	1857	+	16.25	1.9e-06	0.00756	ACTACAACACCC
POLR2A	hTFtarget	NC_000012.12:c68161740-68159740	1023	1037	+	15.8026	1.9e-06	0.00328	CCTGCCTCAGCCTCC
POLR2A	hTFtarget	NC_000012.12:c68161740-68159740	194	209	-	15.9	1.91e-06	0.00758	CCCGCCTCAGCCTCCC
BRD4	hTFtarget	NC_000012.12:c68161740-68159740	906	927	-	15.8846	1.91e-06	0.0012	AAAAAAAAAGAAAAAAAGAAAA
TP53	hTFtarget	NC_000012.12:c68161740-68159740	888	909	-	12.9737	1.91e-06	0.00733	AAAAAAGGAAAGAAATACAGTG
POLR2A	hTFtarget	NC_000012.12:c68161740-68159740	896	911	-	14.7532	1.92e-06	0.00559	AGAAAAAAGGAAAGAA
FLI1	hTFtarget	NC_000012.12:c68161740-68159740	896	917	+	13.2121	1.93e-06	0.00367	TTCTTTCCTTTTTTCTTTTTTT
ZNF143	hTFtarget	NC_000012.12:c68161740-68159740	297	321	-	14.7308	1.93e-06	0.000694	TTTTTTTTTTTTTTTTTTTTTGAGA
EP300	hTFtarget	NC_000012.12:c68161740-68159740	712	727	+	15.0513	1.94e-06	0.00689	ATCTGAAAGACAAAGA
ZNF384	hTFtarget	NC_000012.12:c68161740-68159740	892	913	+	13.5972	1.97e-06	0.000157	GTATTTCTTTCCTTTTTTCTTT
RCOR1	hTFtarget	NC_000012.12:c68161740-68159740	481	496	-	15.8028	2.01e-06	0.00788	CTATGACTCAGTCTCC
SIX5	hTFtarget	NC_000012.12:c68161740-68159740	1846	1864	+	15.0789	2.01e-06	0.00796	ACTACAACACCCAAATGCC
EP300	hTFtarget	NC_000012.12:c68161740-68159740	893	908	+	13.6579	2.02e-06	0.00776	TATTTCTTTCCTTTTT
NOTCH1	hTFtarget	NC_000012.12:c68161740-68159740	1846	1859	+	15.9737	2.03e-06	0.00806	ACTACAACACCCAA
ETS1	hTFtarget	NC_000012.12:c68161740-68159740	1844	1865	+	13.5286	2.04e-06	0.00805	TAACTACAACACCCAAATGCCA
ETS1	hTFtarget	NC_000012.12:c68161740-68159740	1844	1865	+	13.0143	2.05e-06	0.00811	TAACTACAACACCCAAATGCCA
POU2F1	hTFtarget	NC_000012.12:c68161740-68159740	195	210	+	15.8816	2.07e-06	0.0082	GGAGGCTGAGGCGGGA
C17orf96	hTFtarget	NC_000012.12:c68161740-68159740	1021	1045	-	15.5949	2.07e-06	0.00794	GCTACTAGGGAGGCTGAGGCAGGAG
TRIM24	hTFtarget	NC_000012.12:c68161740-68159740	134	155	+	15.4103	2.07e-06	0.000477	AAAAAAAAAAAAAAAAAAAAAT
ZNF92	hTFtarget	NC_000012.12:c68161740-68159740	300	324	-	15.375	2.07e-06	0.000676	TTCTTTTTTTTTTTTTTTTTTTTTG
IRF3	hTFtarget	NC_000012.12:c68161740-68159740	895	916	-	15.7324	2.08e-06	0.00156	AAAAAAGAAAAAAGGAAAGAAA
MYC	hTFtarget	NC_000012.12:c68161740-68159740	993	1008	-	16.0658	2.09e-06	0.00826	CCAGAAGGTGGAGGTT
TRIM28	hTFtarget	NC_000012.12:c68161740-68159740	891	906	-	15.7895	2.09e-06	0.00783	AAAGGAAAGAAATACA
IRF4	database	NC_000012.12:c68161740-68159740	909	924	-	15.7627	2.1e-06	0.000935	AAAAAAGAAAAAAAGA
GTF3C2	hTFtarget	NC_000012.12:c68161740-68159740	131	155	+	13.3636	2.1e-06	0.000941	CAAAAAAAAAAAAAAAAAAAAAAAT
SMARCA4	hTFtarget	NC_000012.12:c68161740-68159740	897	912	-	15.5278	2.1e-06	0.000389	AAGAAAAAAGGAAAGA
ZNF143	hTFtarget	NC_000012.12:c68161740-68159740	1846	1857	-	16.1842	2.1e-06	0.00834	GGGTGTTGTAGT
IRF4	database	NC_000012.12:c68161740-68159740	909	924	-	15.7129	2.1e-06	0.00094	AAAAAAGAAAAAAAGA
FLI1	hTFtarget	NC_000012.12:c68161740-68159740	1542	1559	-	2.07576	2.11e-06	0.00802	GAAAGCAAGGAAAGAATG
RB1	hTFtarget	NC_000012.12:c68161740-68159740	198	213	+	15.6571	2.11e-06	0.00837	GGCTGAGGCGGGAGAA
SP2	hTFtarget	NC_000012.12:c68161740-68159740	911	926	+	15.2083	2.11e-06	0.000307	TTTTTTTCTTTTTTTT
PAX5	database	NC_000012.12:c68161740-68159740	151	169	+	15.8065	2.12e-06	0.00841	AAAATTAGCCGGGCGTGGC
POLR3A	hTFtarget	NC_000012.12:c68161740-68159740	315	330	+	15.1795	2.13e-06	0.000265	AAAAAAAGAAATGACT
TRIM28	hTFtarget	NC_000012.12:c68161740-68159740	1543	1564	-	15.6842	2.17e-06	0.0082	GACCAGAAAGCAAGGAAAGAAT
FOXP1	database	NC_000012.12:c68161740-68159740	138	157	-	2.17857	2.18e-06	0.00099	TAATTTTTTTTTTTTTTTTT
FLI1	hTFtarget	NC_000012.12:c68161740-68159740	902	926	+	-10.9429	2.19e-06	0.00139	CCTTTTTTCTTTTTTTCTTTTTTTT
FOXP1	database	NC_000012.12:c68161740-68159740	305	324	-	2.14286	2.2e-06	0.00099	TTCTTTTTTTTTTTTTTTTT
POLR3A	hTFtarget	NC_000012.12:c68161740-68159740	1180	1196	-	15.7571	2.2e-06	0.00434	CACACCTGTAATCCCAG
BRD4	hTFtarget	NC_000012.12:c68161740-68159740	903	927	-	15.9481	2.2e-06	0.00085	AAAAAAAAAGAAAAAAAGAAAAAAG
THAP11	hTFtarget	NC_000012.12:c68161740-68159740	1844	1859	-	13.7576	2.2e-06	0.00871	TTGGGTGTTGTAGTTA
FOXP1	database	NC_000012.12:c68161740-68159740	132	151	-	2.13095	2.21e-06	0.00099	TTTTTTTTTTTTTTTTTTTT
FOXP1	database	NC_000012.12:c68161740-68159740	133	152	-	2.13095	2.21e-06	0.00099	TTTTTTTTTTTTTTTTTTTT
FOXP1	database	NC_000012.12:c68161740-68159740	134	153	-	2.13095	2.21e-06	0.00099	TTTTTTTTTTTTTTTTTTTT
FOXP1	database	NC_000012.12:c68161740-68159740	135	154	-	2.13095	2.21e-06	0.00099	TTTTTTTTTTTTTTTTTTTT
FOXP1	database	NC_000012.12:c68161740-68159740	301	320	-	2.13095	2.21e-06	0.00099	TTTTTTTTTTTTTTTTTTTT
FOXP1	database	NC_000012.12:c68161740-68159740	302	321	-	2.13095	2.21e-06	0.00099	TTTTTTTTTTTTTTTTTTTT
IRF3	hTFtarget	NC_000012.12:c68161740-68159740	900	915	-	15.7532	2.23e-06	0.00421	AAAAAGAAAAAAGGAA
POLR3A	hTFtarget	NC_000012.12:c68161740-68159740	913	928	-	15.1282	2.25e-06	0.000271	AAAAAAAAAAGAAAAA
TFAP2A	hTFtarget	NC_000012.12:c68161740-68159740	462	477	+	15.3026	2.26e-06	0.00877	AAGCCAGTTTTACAGG
SRC	hTFtarget	NC_000012.12:c68161740-68159740	1006	1017	-	15.2237	2.27e-06	0.00903	GGCTTGAACCCA
EP300	hTFtarget	NC_000012.12:c68161740-68159740	894	909	+	13.9079	2.28e-06	0.00874	ATTTCTTTCCTTTTTT
SP2	hTFtarget	NC_000012.12:c68161740-68159740	917	932	+	15.125	2.31e-06	0.000324	TCTTTTTTTTTTTTTG
ZNF143	hTFtarget	NC_000012.12:c68161740-68159740	129	153	-	14.5769	2.31e-06	0.000754	TTTTTTTTTTTTTTTTTTTTTTGTG
FLI1	hTFtarget	NC_000012.12:c68161740-68159740	896	911	-	9.47143	2.33e-06	0.00444	AGAAAAAAGGAAAGAA
NANOG	hTFtarget	NC_000012.12:c68161740-68159740	712	727	-	14.403	2.33e-06	0.00845	TCTTTGTCTTTCAGAT
SP2	hTFtarget	NC_000012.12:c68161740-68159740	696	717	+	15.1282	2.33e-06	0.000537	TCCTATTTTTTTTTGTATCTGA
GTF3C2	hTFtarget	NC_000012.12:c68161740-68159740	126	150	+	13.1429	2.34e-06	0.000941	TAGCACAAAAAAAAAAAAAAAAAAA
ZNF384	hTFtarget	NC_000012.12:c68161740-68159740	127	151	+	10.7917	2.36e-06	0.000181	AGCACAAAAAAAAAAAAAAAAAAAA
CREB1	hTFtarget	NC_000012.12:c68161740-68159740	483	494	-	14.6053	2.36e-06	0.0092	ATGACTCAGTCT
ETS1	hTFtarget	NC_000012.12:c68161740-68159740	1844	1866	-	11.6429	2.38e-06	0.0094	GTGGCATTTGGGTGTTGTAGTTA
KDM5B	hTFtarget	NC_000012.12:c68161740-68159740	905	929	-	15.2564	2.39e-06	0.000615	AAAAAAAAAAAGAAAAAAAGAAAAA
SPI1	hTFtarget	NC_000012.12:c68161740-68159740	1841	1865	+	15.3614	2.39e-06	0.00942	CTCTAACTACAACACCCAAATGCCA
SP2	hTFtarget	NC_000012.12:c68161740-68159740	301	322	-	15.0897	2.42e-06	0.000537	CTTTTTTTTTTTTTTTTTTTTT
ZNF143	hTFtarget	NC_000012.12:c68161740-68159740	1844	1859	-	14.3788	2.43e-06	0.00964	TTGGGTGTTGTAGTTA
ZNF143	hTFtarget	NC_000012.12:c68161740-68159740	1844	1859	-	13.9848	2.43e-06	0.00961	TTGGGTGTTGTAGTTA
ZNF384	hTFtarget	NC_000012.12:c68161740-68159740	298	319	-	13.0833	2.43e-06	0.00019	TTTTTTTTTTTTTTTTTTTGAG
BATF	database	NC_000012.12:c68161740-68159740	486	495	+	14.9828	2.45e-06	0.00943	CTGAGTCATA
PITX2	database	NC_000012.12:c68161740-68159740	26	35	-	13.4184	2.45e-06	0.00476	TGGGATTACA
PITX2	database	NC_000012.12:c68161740-68159740	1181	1190	+	13.4184	2.45e-06	0.00476	TGGGATTACA
GTF2I	hTFtarget	NC_000012.12:c68161740-68159740	196	211	-	15.1286	2.45e-06	0.00482	CTCCCGCCTCAGCCTC
SP2	hTFtarget	NC_000012.12:c68161740-68159740	131	152	-	15.0769	2.45e-06	0.000537	TTTTTTTTTTTTTTTTTTTTTG
SP2	hTFtarget	NC_000012.12:c68161740-68159740	300	321	-	15.0769	2.45e-06	0.000537	TTTTTTTTTTTTTTTTTTTTTG
YY1	hTFtarget	NC_000012.12:c68161740-68159740	198	213	-	15.3158	2.45e-06	0.00971	TTCTCCCGCCTCAGCC
BATF	database	NC_000012.12:c68161740-68159740	486	495	-	14.9091	2.45e-06	0.00921	TATGACTCAG
PITX2	database	NC_000012.12:c68161740-68159740	26	35	+	13.4184	2.45e-06	0.00476	TGTAATCCCA
PITX2	database	NC_000012.12:c68161740-68159740	1181	1190	-	13.4184	2.45e-06	0.00476	TGTAATCCCA
FOXP4	database	NC_000012.12:c68161740-68159740	909	923	-	14.5941	2.47e-06	0.00287	AAAAAGAAAAAAAGA
BRD4	hTFtarget	NC_000012.12:c68161740-68159740	900	921	-	15.5641	2.48e-06	0.0012	AAAGAAAAAAAGAAAAAAGGAA
POLR3A	hTFtarget	NC_000012.12:c68161740-68159740	142	157	+	15.0385	2.49e-06	0.00029	AAAAAAAAAAAAATTA
TRIM24	hTFtarget	NC_000012.12:c68161740-68159740	141	162	+	15.1923	2.49e-06	0.000537	AAAAAAAAAAAAAATTAGCCGG
FLI1	hTFtarget	NC_000012.12:c68161740-68159740	905	929	-	-5.17105	2.5e-06	0.00189	AAAAAAAAAAAGAAAAAAAGAAAAA
RELA	hTFtarget	NC_000012.12:c68161740-68159740	1845	1863	-	14.2105	2.5e-06	0.00992	GCATTTGGGTGTTGTAGTT
ZNF143	hTFtarget	NC_000012.12:c68161740-68159740	1844	1859	-	14.0758	2.5e-06	0.00989	TTGGGTGTTGTAGTTA
FLI1	hTFtarget	NC_000012.12:c68161740-68159740	1538	1559	+	2.31429	2.51e-06	0.00318	ACCGCATTCTTTCCTTGCTTTC
SMARCA4	hTFtarget	NC_000012.12:c68161740-68159740	309	324	+	15.3333	2.51e-06	0.000397	AAAAAAAAAAAAAGAA
SMARCA4	hTFtarget	NC_000012.12:c68161740-68159740	916	931	-	15.3333	2.51e-06	0.000397	AAAAAAAAAAAAAGAA
KDM5B	hTFtarget	NC_000012.12:c68161740-68159740	904	919	+	15.9444	2.52e-06	0.00342	TTTTTTCTTTTTTTCT
TCF3	hTFtarget	NC_000012.12:c68161740-68159740	1216	1227	+	15.1974	2.52e-06	0.01	CCCCCTGGGAAT
BRD4	hTFtarget	NC_000012.12:c68161740-68159740	910	931	-	15.5385	2.53e-06	0.0012	AAAAAAAAAAAAAGAAAAAAAG
SMARCA4	hTFtarget	NC_000012.12:c68161740-68159740	130	145	+	15.3194	2.54e-06	0.000397	ACAAAAAAAAAAAAAA
EP300	hTFtarget	NC_000012.12:c68161740-68159740	893	906	-	14.0571	2.55e-06	0.0097	AAAGGAAAGAAATA
KDM5B	hTFtarget	NC_000012.12:c68161740-68159740	300	324	+	15.1282	2.57e-06	0.000615	CAAAAAAAAAAAAAAAAAAAAAGAA
SOX2	hTFtarget	NC_000012.12:c68161740-68159740	1844	1859	-	15.0132	2.57e-06	0.0102	TTGGGTGTTGTAGTTA
RUNX2	database	NC_000012.12:c68161740-68159740	1641	1651	-	14.0488	2.59e-06	0.0103	TTGTGGTTGGG
RUNX2	database	NC_000012.12:c68161740-68159740	1641	1651	+	14.0306	2.59e-06	0.0103	CCCAACCACAA
MED1	hTFtarget	NC_000012.12:c68161740-68159740	914	929	-	15.4026	2.6e-06	0.00319	AAAAAAAAAAAGAAAA
IRF5	hTFtarget	NC_000012.12:c68161740-68159740	910	925	-	12.8701	2.62e-06	0.000253	AAAAAAAGAAAAAAAG
KDM5B	hTFtarget	NC_000012.12:c68161740-68159740	908	932	-	15.0897	2.62e-06	0.000615	CAAAAAAAAAAAAAGAAAAAAAGAA
EP300	hTFtarget	NC_000012.12:c68161740-68159740	894	909	+	11.4211	2.65e-06	0.0103	ATTTCTTTCCTTTTTT
MEF2A	database	NC_000012.12:c68161740-68159740	116	132	+	15.8681	2.66e-06	0.00901	GTACTAAAAATAGCACA
ZNF143	hTFtarget	NC_000012.12:c68161740-68159740	1844	1859	-	13.6364	2.67e-06	0.0106	TTGGGTGTTGTAGTTA
ZNF143	hTFtarget	NC_000012.12:c68161740-68159740	132	152	+	14.7051	2.67e-06	0.00162	AAAAAAAAAAAAAAAAAAAAA
ZNF143	hTFtarget	NC_000012.12:c68161740-68159740	133	153	+	14.7051	2.67e-06	0.00162	AAAAAAAAAAAAAAAAAAAAA
ZNF143	hTFtarget	NC_000012.12:c68161740-68159740	134	154	+	14.7051	2.67e-06	0.00162	AAAAAAAAAAAAAAAAAAAAA
ZNF143	hTFtarget	NC_000012.12:c68161740-68159740	301	321	+	14.7051	2.67e-06	0.00162	AAAAAAAAAAAAAAAAAAAAA
NCOR1	hTFtarget	NC_000012.12:c68161740-68159740	117	128	-	14.8077	2.68e-06	0.00956	CTATTTTTAGTA
TOP1	hTFtarget	NC_000012.12:c68161740-68159740	994	1008	-	15.7105	2.68e-06	0.0107	CCAGAAGGTGGAGGT
IRF1	hTFtarget	NC_000012.12:c68161740-68159740	899	914	-	15.3896	2.7e-06	0.00237	AAAAGAAAAAAGGAAA
SMARCA4	hTFtarget	NC_000012.12:c68161740-68159740	912	927	-	15.25	2.71e-06	0.000397	AAAAAAAAAGAAAAAA
EP300	hTFtarget	NC_000012.12:c68161740-68159740	712	727	+	14.9861	2.73e-06	0.0094	ATCTGAAAGACAAAGA
ZNF143	hTFtarget	NC_000012.12:c68161740-68159740	1846	1867	+	14.6316	2.75e-06	0.0109	ACTACAACACCCAAATGCCACA
ZNF384	hTFtarget	NC_000012.12:c68161740-68159740	128	152	+	10.3333	2.76e-06	0.000206	GCACAAAAAAAAAAAAAAAAAAAAA
CREBBP	hTFtarget	NC_000012.12:c68161740-68159740	485	494	-	15.5263	2.76e-06	0.011	ATGACTCAGT
ZNF92	hTFtarget	NC_000012.12:c68161740-68159740	133	157	-	14.8889	2.78e-06	0.000833	TAATTTTTTTTTTTTTTTTTTTTTT
ZNF143	hTFtarget	NC_000012.12:c68161740-68159740	915	939	+	14.4103	2.79e-06	0.000836	TTTCTTTTTTTTTTTTTGAGACGGA
ZNF384	hTFtarget	NC_000012.12:c68161740-68159740	910	934	-	10.2917	2.8e-06	0.000206	CTCAAAAAAAAAAAAAGAAAAAAAG
CEBPB	hTFtarget	NC_000012.12:c68161740-68159740	250	265	+	15.1818	2.81e-06	0.0103	GAGATTGCGCCACTGC
SMARCA4	hTFtarget	NC_000012.12:c68161740-68159740	131	146	+	15.2083	2.82e-06	0.000397	CAAAAAAAAAAAAAAA
SMARCA4	hTFtarget	NC_000012.12:c68161740-68159740	300	315	+	15.2083	2.82e-06	0.000397	CAAAAAAAAAAAAAAA
SP2	hTFtarget	NC_000012.12:c68161740-68159740	914	929	+	14.9444	2.82e-06	0.000382	TTTTCTTTTTTTTTTT
IRF5	hTFtarget	NC_000012.12:c68161740-68159740	251	272	+	15.1299	2.83e-06	0.0028	AGATTGCGCCACTGCACTCCAG
ERG	hTFtarget	NC_000012.12:c68161740-68159740	906	921	+	15.5	2.83e-06	0.00538	TTTTCTTTTTTTCTTT
MED1	hTFtarget	NC_000012.12:c68161740-68159740	912	927	-	15.2987	2.84e-06	0.00319	AAAAAAAAAGAAAAAA
MED1	hTFtarget	NC_000012.12:c68161740-68159740	912	927	+	15.1429	2.85e-06	0.00248	TTTTTTCTTTTTTTTT
KLF5	hTFtarget	NC_000012.12:c68161740-68159740	158	173	-	15.4848	2.89e-06	0.0114	ACTCGCCACGCCCGGC
POLR2A	hTFtarget	NC_000012.12:c68161740-68159740	904	919	-	14.4286	2.89e-06	0.00559	AGAAAAAAAGAAAAAA
ETS1	hTFtarget	NC_000012.12:c68161740-68159740	1844	1868	-	10.2714	2.91e-06	0.0115	TTGTGGCATTTGGGTGTTGTAGTTA
GTF3C2	hTFtarget	NC_000012.12:c68161740-68159740	129	153	+	12.6753	2.91e-06	0.00104	CACAAAAAAAAAAAAAAAAAAAAAA
IRF5	hTFtarget	NC_000012.12:c68161740-68159740	908	923	-	12.5584	2.94e-06	0.000276	AAAAAGAAAAAAAGAA
CEBPB	hTFtarget	NC_000012.12:c68161740-68159740	250	265	-	15.5152	2.94e-06	0.0108	GCAGTGGCGCAATCTC
EBF1	database	NC_000012.12:c68161740-68159740	1215	1225	+	15.5745	2.95e-06	0.0117	TCCCCCTGGGA
IRF3	hTFtarget	NC_000012.12:c68161740-68159740	121	145	+	14.8077	2.96e-06	0.000698	AAAAATAGCACAAAAAAAAAAAAAA
NANOG	hTFtarget	NC_000012.12:c68161740-68159740	711	731	-	15.0694	2.96e-06	0.0109	TATTTCTTTGTCTTTCAGATA
ZNF280D	hTFtarget	NC_000012.12:c68161740-68159740	1846	1863	+	14.4079	2.98e-06	0.0118	ACTACAACACCCAAATGC
ASCL1	hTFtarget	NC_000012.12:c68161740-68159740	1977	1999	+	15.1842	2.99e-06	0.0118	ACCAGCAGCCAGAGGAGGTGCAG
POLR2A	hTFtarget	NC_000012.12:c68161740-68159740	196	211	-	15.1579	2.99e-06	0.00746	CTCCCGCCTCAGCCTC
E2F4	hTFtarget	NC_000012.12:c68161740-68159740	203	218	-	14.9091	3e-06	0.0119	CGCCATTCTCCCGCCT
MEF2D	database	NC_000012.12:c68161740-68159740	118	129	-	15.5714	3.01e-06	0.0106	GCTATTTTTAGT
TAF3	hTFtarget	NC_000012.12:c68161740-68159740	198	213	+	15.3684	3.01e-06	0.0109	GGCTGAGGCGGGAGAA
CDK9	hTFtarget	NC_000012.12:c68161740-68159740	905	920	-	15.1667	3.01e-06	0.000824	AAGAAAAAAAGAAAAA
AC002126	database	NC_000012.12:c68161740-68159740	118	129	+	15.5743	3.01e-06	0.0106	ACTAAAAATAGC
FLI1	hTFtarget	NC_000012.12:c68161740-68159740	1540	1561	+	12.2424	3.02e-06	0.00383	CGCATTCTTTCCTTGCTTTCTG
ZNF92	hTFtarget	NC_000012.12:c68161740-68159740	129	153	-	14.75	3.02e-06	0.000835	TTTTTTTTTTTTTTTTTTTTTTGTG
JUND	hTFtarget	NC_000012.12:c68161740-68159740	482	497	-	15.9714	3.03e-06	0.012	TCTATGACTCAGTCTC
POLR2A	hTFtarget	NC_000012.12:c68161740-68159740	44	58	-	15.0263	3.03e-06	0.00328	CCCGCCTTGGCCTCC
ZNF384	hTFtarget	NC_000012.12:c68161740-68159740	892	916	-	10.0556	3.03e-06	0.000219	AAAAAAGAAAAAAGGAAAGAAATAC
E2F1	hTFtarget	NC_000012.12:c68161740-68159740	47	62	+	15.0152	3.03e-06	0.0121	GGCCAAGGCGGGCGGA
FLI1	hTFtarget	NC_000012.12:c68161740-68159740	897	912	-	14.8507	3.04e-06	0.00569	AAGAAAAAAGGAAAGA
IRF3	hTFtarget	NC_000012.12:c68161740-68159740	900	921	-	15.1268	3.05e-06	0.00156	AAAGAAAAAAAGAAAAAAGGAA
ZNF384	hTFtarget	NC_000012.12:c68161740-68159740	895	916	+	12.5139	3.05e-06	0.000233	TTTCTTTCCTTTTTTCTTTTTT
DMRT2	database	NC_000012.12:c68161740-68159740	1288	1303	-	15.4184	3.06e-06	0.0106	CAATATACTACATTGT
HCFC1	hTFtarget	NC_000012.12:c68161740-68159740	1844	1859	-	14.3143	3.1e-06	0.0123	TTGGGTGTTGTAGTTA
HCFC1	hTFtarget	NC_000012.12:c68161740-68159740	1846	1861	-	14.5	3.12e-06	0.0123	ATTTGGGTGTTGTAGT
ZNF350	database	NC_000012.12:c68161740-68159740	226	240	+	13.6633	3.13e-06	0.0124	GGGAGGCAGAGCTTG
ZNF384	hTFtarget	NC_000012.12:c68161740-68159740	894	915	+	12.4444	3.13e-06	0.000235	ATTTCTTTCCTTTTTTCTTTTT
GMEB1	hTFtarget	NC_000012.12:c68161740-68159740	1846	1861	-	14.6053	3.14e-06	0.0124	ATTTGGGTGTTGTAGT
CTCF	hTFtarget	NC_000012.12:c68161740-68159740	994	1009	+	15.3485	3.15e-06	0.0125	ACCTCCACCTTCTGGG
SPI1	hTFtarget	NC_000012.12:c68161740-68159740	994	1009	+	14.9737	3.17e-06	0.0126	ACCTCCACCTTCTGGG
MAX	hTFtarget	NC_000012.12:c68161740-68159740	994	1008	+	15.25	3.19e-06	0.0127	ACCTCCACCTTCTGG
SMAD4	hTFtarget	NC_000012.12:c68161740-68159740	195	210	+	14.8732	3.25e-06	0.0129	GGAGGCTGAGGCGGGA
ZNF143	hTFtarget	NC_000012.12:c68161740-68159740	1844	1859	-	13.5455	3.27e-06	0.013	TTGGGTGTTGTAGTTA
THAP11	hTFtarget	NC_000012.12:c68161740-68159740	1844	1859	-	13.6286	3.29e-06	0.013	TTGGGTGTTGTAGTTA
ZNF384	hTFtarget	NC_000012.12:c68161740-68159740	259	274	-	15.0526	3.29e-06	0.00695	GGCTGGAGTGCAGTGG
NFE2	hTFtarget	NC_000012.12:c68161740-68159740	901	922	+	14.9103	3.3e-06	0.0121	TCCTTTTTTCTTTTTTTCTTTT
CTCF	hTFtarget	NC_000012.12:c68161740-68159740	994	1009	-	15.197	3.3e-06	0.0131	CCCAGAAGGTGGAGGT
CTCF	hTFtarget	NC_000012.12:c68161740-68159740	994	1009	-	15.197	3.3e-06	0.0131	CCCAGAAGGTGGAGGT
POLR2A	hTFtarget	NC_000012.12:c68161740-68159740	1158	1172	+	14.8816	3.31e-06	0.00328	CCCGCCTCAACCTCC
MYC	hTFtarget	NC_000012.12:c68161740-68159740	1844	1865	+	13.3553	3.32e-06	0.0131	TAACTACAACACCCAAATGCCA
TP53	hTFtarget	NC_000012.12:c68161740-68159740	897	918	-	5.11111	3.32e-06	0.00521	GAAAAAAAGAAAAAAGGAAAGA
CTCF	hTFtarget	NC_000012.12:c68161740-68159740	998	1008	-	15.2879	3.32e-06	0.0132	CCAGAAGGTGG
AIRE	database	NC_000012.12:c68161740-68159740	1317	1342	+	15.2921	3.34e-06	0.0123	TACTATTTGGGATATATTGGTTTAAA
POLR2A	hTFtarget	NC_000012.12:c68161740-68159740	195	209	+	15	3.35e-06	0.0133	GGAGGCTGAGGCGGG
IRF3	hTFtarget	NC_000012.12:c68161740-68159740	901	925	-	14.5513	3.39e-06	0.000714	AAAAAAAGAAAAAAAGAAAAAAGGA
E2F6	hTFtarget	NC_000012.12:c68161740-68159740	202	212	+	15.4714	3.39e-06	0.0135	GAGGCGGGAGA
SPI1	hTFtarget	NC_000012.12:c68161740-68159740	992	1008	-	14.9143	3.4e-06	0.0135	CCAGAAGGTGGAGGTTG
IRF3	hTFtarget	NC_000012.12:c68161740-68159740	300	324	+	14.5385	3.41e-06	0.000714	CAAAAAAAAAAAAAAAAAAAAAGAA
TRIM24	hTFtarget	NC_000012.12:c68161740-68159740	898	919	-	14.8077	3.42e-06	0.000662	AGAAAAAAAGAAAAAAGGAAAG
ZNF143	hTFtarget	NC_000012.12:c68161740-68159740	1844	1858	-	15.0658	3.42e-06	0.0136	TGGGTGTTGTAGTTA
ZNF384	hTFtarget	NC_000012.12:c68161740-68159740	913	934	+	12.2222	3.42e-06	0.000251	TTTTTCTTTTTTTTTTTTTGAG
CTCF	hTFtarget	NC_000012.12:c68161740-68159740	994	1008	-	15.1061	3.44e-06	0.0137	CCAGAAGGTGGAGGT
FLI1	hTFtarget	NC_000012.12:c68161740-68159740	897	916	+	-20.1061	3.47e-06	0.00666	TCTTTCCTTTTTTCTTTTTT
CTCF	hTFtarget	NC_000012.12:c68161740-68159740	994	1008	-	15.0909	3.47e-06	0.0138	CCAGAAGGTGGAGGT
IRF5	hTFtarget	NC_000012.12:c68161740-68159740	917	932	-	12.0519	3.5e-06	0.00032	CAAAAAAAAAAAAAGA
ZNF384	hTFtarget	NC_000012.12:c68161740-68159740	2	17	+	14.9737	3.51e-06	0.00695	AGGCCGGGTGCGGTGG
EP300	hTFtarget	NC_000012.12:c68161740-68159740	462	477	-	15.1711	3.52e-06	0.0139	CCTGTAAAACTGGCTT
IRF5	hTFtarget	NC_000012.12:c68161740-68159740	1004	1019	-	14.8182	3.54e-06	0.00752	ATGGCTTGAACCCAGA
IRF1	hTFtarget	NC_000012.12:c68161740-68159740	259	270	+	15.3421	3.55e-06	0.0141	CCACTGCACTCC
CEBPB	hTFtarget	NC_000012.12:c68161740-68159740	250	265	+	14.7576	3.55e-06	0.0131	GAGATTGCGCCACTGC
EP300	hTFtarget	NC_000012.12:c68161740-68159740	889	907	+	6.46053	3.56e-06	0.0136	ACTGTATTTCTTTCCTTTT
MED1	hTFtarget	NC_000012.12:c68161740-68159740	914	929	+	14.9091	3.57e-06	0.00248	TTTTCTTTTTTTTTTT
BTAF1	hTFtarget	NC_000012.12:c68161740-68159740	899	914	-	15.0641	3.58e-06	0.0003	AAAAGAAAAAAGGAAA
IRF5	hTFtarget	NC_000012.12:c68161740-68159740	696	711	-	11.987	3.59e-06	0.00032	ACAAAAAAAAATAGGA
KDM5B	hTFtarget	NC_000012.12:c68161740-68159740	896	911	+	15.4861	3.6e-06	0.00342	TTCTTTCCTTTTTTCT
IRF3	hTFtarget	NC_000012.12:c68161740-68159740	132	153	+	14.8451	3.63e-06	0.00156	AAAAAAAAAAAAAAAAAAAAAA
IRF3	hTFtarget	NC_000012.12:c68161740-68159740	133	154	+	14.8451	3.63e-06	0.00156	AAAAAAAAAAAAAAAAAAAAAA
KDM5B	hTFtarget	NC_000012.12:c68161740-68159740	892	916	-	14.4615	3.64e-06	0.000805	AAAAAAGAAAAAAGGAAAGAAATAC
TRIM24	hTFtarget	NC_000012.12:c68161740-68159740	131	152	+	14.7308	3.64e-06	0.000662	CAAAAAAAAAAAAAAAAAAAAA
TRIM24	hTFtarget	NC_000012.12:c68161740-68159740	300	321	+	14.7308	3.64e-06	0.000662	CAAAAAAAAAAAAAAAAAAAAA
STAG1	hTFtarget	NC_000012.12:c68161740-68159740	993	1008	-	15.1447	3.65e-06	0.0145	CCAGAAGGTGGAGGTT
ZNF92	hTFtarget	NC_000012.12:c68161740-68159740	303	327	-	14.4306	3.65e-06	0.00086	CATTTCTTTTTTTTTTTTTTTTTTT
ZNF92	hTFtarget	NC_000012.12:c68161740-68159740	304	328	-	14.4306	3.65e-06	0.00086	TCATTTCTTTTTTTTTTTTTTTTTT
CEBPA	hTFtarget	NC_000012.12:c68161740-68159740	250	265	+	14.8485	3.65e-06	0.014	GAGATTGCGCCACTGC
SP2	hTFtarget	NC_000012.12:c68161740-68159740	716	731	-	14.6806	3.69e-06	0.000482	TATTTCTTTGTCTTTC
BCL6	hTFtarget	NC_000012.12:c68161740-68159740	1846	1857	-	14.9211	3.7e-06	0.0145	GGGTGTTGTAGT
EWSR1	hTFtarget	NC_000012.12:c68161740-68159740	897	915	-	6.28788	3.72e-06	0.0142	AAAAAGAAAAAAGGAAAGA
ZNF384	hTFtarget	NC_000012.12:c68161740-68159740	142	166	+	9.44444	3.72e-06	0.000263	AAAAAAAAAAAAATTAGCCGGGCGT
FLI1	hTFtarget	NC_000012.12:c68161740-68159740	1545	1556	-	14.3732	3.73e-06	0.0144	AGCAAGGAAAGA
SP2	hTFtarget	NC_000012.12:c68161740-68159740	912	933	+	14.6282	3.73e-06	0.00077	TTTTTTCTTTTTTTTTTTTTGA
IRF3	hTFtarget	NC_000012.12:c68161740-68159740	903	927	-	14.359	3.74e-06	0.000743	AAAAAAAAAGAAAAAAAGAAAAAAG
STAT1	hTFtarget	NC_000012.12:c68161740-68159740	469	484	-	14.0921	3.74e-06	0.0148	CTCCTTACCTGTAAAA
MYPOP	database	NC_000012.12:c68161740-68159740	252	261	+	14.3061	3.76e-06	0.0147	GATTGCGCCA
POLR2A	hTFtarget	NC_000012.12:c68161740-68159740	193	208	-	14.7763	3.77e-06	0.00746	CCGCCTCAGCCTCCCG
BRD4	hTFtarget	NC_000012.12:c68161740-68159740	130	151	+	15.0256	3.77e-06	0.0016	ACAAAAAAAAAAAAAAAAAAAA
SIX5	hTFtarget	NC_000012.12:c68161740-68159740	1844	1859	-	12.8182	3.78e-06	0.0149	TTGGGTGTTGTAGTTA
IRF5	hTFtarget	NC_000012.12:c68161740-68159740	64	79	-	14.7403	3.79e-06	0.00752	ATCTCCTGACCTCGTG
POLR3A	hTFtarget	NC_000012.12:c68161740-68159740	899	914	-	14.641	3.79e-06	0.000426	AAAAGAAAAAAGGAAA
CTCF	hTFtarget	NC_000012.12:c68161740-68159740	994	1008	-	15	3.81e-06	0.0151	CCAGAAGGTGGAGGT
BTAF1	hTFtarget	NC_000012.12:c68161740-68159740	129	144	+	14.9744	3.82e-06	0.000313	CACAAAAAAAAAAAAA
RUNX2	database	NC_000012.12:c68161740-68159740	1642	1656	-	15.1311	3.84e-06	0.0151	TTTGCTTGTGGTTGG
TRIM24	hTFtarget	NC_000012.12:c68161740-68159740	130	151	+	14.6667	3.84e-06	0.000663	ACAAAAAAAAAAAAAAAAAAAA
SIX5	hTFtarget	NC_000012.12:c68161740-68159740	1109	1129	-	14.8442	3.85e-06	0.0152	AGCCTAGCCAATATGGTGAAA
ZNF92	hTFtarget	NC_000012.12:c68161740-68159740	124	148	-	14.3333	3.87e-06	0.00086	TTTTTTTTTTTTTTTTTGTGCTATT
MAZ	database	NC_000012.12:c68161740-68159740	1697	1713	+	14.9775	3.88e-06	0.0153	AGGGCGAAGTGGGGAGG
ZBTB33	hTFtarget	NC_000012.12:c68161740-68159740	1844	1859	+	14.5844	3.91e-06	0.0152	TAACTACAACACCCAA
ZNF143	hTFtarget	NC_000012.12:c68161740-68159740	895	915	-	14.3205	3.91e-06	0.00203	AAAAAGAAAAAAGGAAAGAAA
MAZ	database	NC_000012.12:c68161740-68159740	1697	1713	+	14.949	3.92e-06	0.0154	AGGGCGAAGTGGGGAGG
CEBPB	hTFtarget	NC_000012.12:c68161740-68159740	250	265	+	15	3.93e-06	0.0147	GAGATTGCGCCACTGC
EZH2	hTFtarget	NC_000012.12:c68161740-68159740	132	153	+	12.9302	3.97e-06	0.00271	AAAAAAAAAAAAAAAAAAAAAA
EZH2	hTFtarget	NC_000012.12:c68161740-68159740	133	154	+	12.9302	3.97e-06	0.00271	AAAAAAAAAAAAAAAAAAAAAA
EWSR1	hTFtarget	NC_000012.12:c68161740-68159740	896	920	-	-3.9697	3.97e-06	0.00761	AAGAAAAAAAGAAAAAAGGAAAGAA
SIX5	hTFtarget	NC_000012.12:c68161740-68159740	1844	1863	-	11.1364	3.97e-06	0.0157	GCATTTGGGTGTTGTAGTTA
RELB	database	NC_000012.12:c68161740-68159740	1209	1220	-	14.36	3.99e-06	0.0158	GGGGGAGTTCCA
RELB	database	NC_000012.12:c68161740-68159740	1209	1220	-	14.3516	4.02e-06	0.0158	GGGGGAGTTCCA
NKX2-8	database	NC_000012.12:c68161740-68159740	1730	1738	-	14.2459	4.03e-06	0.0161	TTCAAGGAC
AP1	database	NC_000012.12:c68161740-68159740	486	494	-	12.1053	4.03e-06	0.0152	ATGACTCAG
FOS	hTFtarget	NC_000012.12:c68161740-68159740	486	494	+	14.5857	4.03e-06	0.016	CTGAGTCAT
FOS	hTFtarget	NC_000012.12:c68161740-68159740	486	494	-	13.7429	4.03e-06	0.0153	ATGACTCAG
FOS	hTFtarget	NC_000012.12:c68161740-68159740	486	494	-	14.4286	4.03e-06	0.016	ATGACTCAG
FOSL2	hTFtarget	NC_000012.12:c68161740-68159740	486	494	-	14.9848	4.03e-06	0.0157	ATGACTCAG
FOSL2	hTFtarget	NC_000012.12:c68161740-68159740	486	494	+	14.9571	4.03e-06	0.0159	CTGAGTCAT
JUN	hTFtarget	NC_000012.12:c68161740-68159740	486	494	+	14.1286	4.03e-06	0.0157	CTGAGTCAT
JUND	hTFtarget	NC_000012.12:c68161740-68159740	486	494	-	14.9605	4.03e-06	0.0153	ATGACTCAG
KMT2B	hTFtarget	NC_000012.12:c68161740-68159740	486	494	-	14.3429	4.03e-06	0.016	ATGACTCAG
MAX	hTFtarget	NC_000012.12:c68161740-68159740	486	494	+	14.9868	4.03e-06	0.0152	CTGAGTCAT
MBD3	hTFtarget	NC_000012.12:c68161740-68159740	486	494	-	15.3684	4.03e-06	0.0154	ATGACTCAG
MEF2A	hTFtarget	NC_000012.12:c68161740-68159740	486	494	-	15.0526	4.03e-06	0.0158	ATGACTCAG
MYC	hTFtarget	NC_000012.12:c68161740-68159740	486	494	-	14.8026	4.03e-06	0.0155	ATGACTCAG
SMAD3	hTFtarget	NC_000012.12:c68161740-68159740	486	494	+	14.3857	4.03e-06	0.016	CTGAGTCAT
SMAD4	hTFtarget	NC_000012.12:c68161740-68159740	486	494	+	14.3571	4.03e-06	0.016	CTGAGTCAT
SMARCC2	hTFtarget	NC_000012.12:c68161740-68159740	486	494	-	15.1316	4.03e-06	0.0156	ATGACTCAG
SPI1	hTFtarget	NC_000012.12:c68161740-68159740	486	494	-	15.1974	4.03e-06	0.016	ATGACTCAG
SPI1	hTFtarget	NC_000012.12:c68161740-68159740	486	494	+	14.8	4.03e-06	0.0156	CTGAGTCAT
SPI1	hTFtarget	NC_000012.12:c68161740-68159740	486	494	+	15.2895	4.03e-06	0.016	CTGAGTCAT
SPI1	hTFtarget	NC_000012.12:c68161740-68159740	486	494	-	14.987	4.03e-06	0.016	ATGACTCAG
SPI1	hTFtarget	NC_000012.12:c68161740-68159740	486	494	+	14.5921	4.03e-06	0.0156	CTGAGTCAT
SPI1	hTFtarget	NC_000012.12:c68161740-68159740	486	494	-	14.5	4.03e-06	0.015	ATGACTCAG
SPI1	hTFtarget	NC_000012.12:c68161740-68159740	486	494	-	14.6	4.03e-06	0.0157	ATGACTCAG
SPI1	hTFtarget	NC_000012.12:c68161740-68159740	486	494	-	14.8158	4.03e-06	0.0156	ATGACTCAG
SPI1	hTFtarget	NC_000012.12:c68161740-68159740	486	494	-	14.6857	4.03e-06	0.016	ATGACTCAG
CDK9	hTFtarget	NC_000012.12:c68161740-68159740	1846	1861	+	13.2714	4.03e-06	0.0159	ACTACAACACCCAAAT
EP300	hTFtarget	NC_000012.12:c68161740-68159740	486	494	-	14.6447	4.03e-06	0.0154	ATGACTCAG
HCFC1	hTFtarget	NC_000012.12:c68161740-68159740	1844	1860	+	13.1515	4.04e-06	0.016	TAACTACAACACCCAAA
GTF2I	hTFtarget	NC_000012.12:c68161740-68159740	194	202	-	14.9286	4.06e-06	0.00807	CAGCCTCCC
GTF2I	hTFtarget	NC_000012.12:c68161740-68159740	1030	1038	+	14.9286	4.06e-06	0.00807	CAGCCTCCC
ZNF92	hTFtarget	NC_000012.12:c68161740-68159740	121	145	-	14.25	4.06e-06	0.00086	TTTTTTTTTTTTTTGTGCTATTTTT
CDK9	hTFtarget	NC_000012.12:c68161740-68159740	1846	1863	+	13.0286	4.07e-06	0.0161	ACTACAACACCCAAATGC
RELA	hTFtarget	NC_000012.12:c68161740-68159740	1844	1859	-	13.6429	4.09e-06	0.0162	TTGGGTGTTGTAGTTA
BTAF1	hTFtarget	NC_000012.12:c68161740-68159740	312	327	+	14.8846	4.09e-06	0.000328	AAAAAAAAAAGAAATG
GTF3C2	hTFtarget	NC_000012.12:c68161740-68159740	72	86	+	14.5286	4.13e-06	0.0164	CAGGAGATCGAGACC
HCFC1	hTFtarget	NC_000012.12:c68161740-68159740	1845	1861	+	12.7857	4.13e-06	0.0164	AACTACAACACCCAAAT
CDK9	hTFtarget	NC_000012.12:c68161740-68159740	132	147	+	14.8205	4.13e-06	0.000824	AAAAAAAAAAAAAAAA
CDK9	hTFtarget	NC_000012.12:c68161740-68159740	133	148	+	14.8205	4.13e-06	0.000824	AAAAAAAAAAAAAAAA
CDK9	hTFtarget	NC_000012.12:c68161740-68159740	134	149	+	14.8205	4.13e-06	0.000824	AAAAAAAAAAAAAAAA
CDK9	hTFtarget	NC_000012.12:c68161740-68159740	135	150	+	14.8205	4.13e-06	0.000824	AAAAAAAAAAAAAAAA
CDK9	hTFtarget	NC_000012.12:c68161740-68159740	136	151	+	14.8205	4.13e-06	0.000824	AAAAAAAAAAAAAAAA
CDK9	hTFtarget	NC_000012.12:c68161740-68159740	137	152	+	14.8205	4.13e-06	0.000824	AAAAAAAAAAAAAAAA
CDK9	hTFtarget	NC_000012.12:c68161740-68159740	138	153	+	14.8205	4.13e-06	0.000824	AAAAAAAAAAAAAAAA
CDK9	hTFtarget	NC_000012.12:c68161740-68159740	139	154	+	14.8205	4.13e-06	0.000824	AAAAAAAAAAAAAAAA
CDK9	hTFtarget	NC_000012.12:c68161740-68159740	301	316	+	14.8205	4.13e-06	0.000824	AAAAAAAAAAAAAAAA
CDK9	hTFtarget	NC_000012.12:c68161740-68159740	302	317	+	14.8205	4.13e-06	0.000824	AAAAAAAAAAAAAAAA
CDK9	hTFtarget	NC_000012.12:c68161740-68159740	303	318	+	14.8205	4.13e-06	0.000824	AAAAAAAAAAAAAAAA
CDK9	hTFtarget	NC_000012.12:c68161740-68159740	304	319	+	14.8205	4.13e-06	0.000824	AAAAAAAAAAAAAAAA
CDK9	hTFtarget	NC_000012.12:c68161740-68159740	305	320	+	14.8205	4.13e-06	0.000824	AAAAAAAAAAAAAAAA
CDK9	hTFtarget	NC_000012.12:c68161740-68159740	306	321	+	14.8205	4.13e-06	0.000824	AAAAAAAAAAAAAAAA
ARRB1	hTFtarget	NC_000012.12:c68161740-68159740	1824	1839	-	14.6234	4.15e-06	0.0161	TTCCTTTAGACTCCTT
EP300	hTFtarget	NC_000012.12:c68161740-68159740	34	55	-	5.47368	4.15e-06	0.0164	GCCTTGGCCTCCCAAAGTGCTG
ZNF281	hTFtarget	NC_000012.12:c68161740-68159740	994	1009	-	14.5395	4.17e-06	0.0166	CCCAGAAGGTGGAGGT
FLI1	hTFtarget	NC_000012.12:c68161740-68159740	905	929	+	-13.8857	4.19e-06	0.00228	TTTTTCTTTTTTTCTTTTTTTTTTT
PAX5	hTFtarget	NC_000012.12:c68161740-68159740	156	169	+	14.831	4.2e-06	0.0167	TAGCCGGGCGTGGC
SP2	hTFtarget	NC_000012.12:c68161740-68159740	302	323	-	14.4872	4.24e-06	0.000827	TCTTTTTTTTTTTTTTTTTTTT
BTAF1	hTFtarget	NC_000012.12:c68161740-68159740	314	329	+	14.8333	4.25e-06	0.000334	AAAAAAAAGAAATGAC
TRIM24	hTFtarget	NC_000012.12:c68161740-68159740	723	744	+	14.5385	4.26e-06	0.0007	AAAGAAATAAAAAGTTAAAAAG
IRF3	hTFtarget	NC_000012.12:c68161740-68159740	304	325	+	14.5775	4.27e-06	0.00156	AAAAAAAAAAAAAAAAAAGAAA
ZNF92	hTFtarget	NC_000012.12:c68161740-68159740	1009	1024	-	11.3714	4.27e-06	0.0164	GGAGAATGGCTTGAAC
ESR1	hTFtarget	NC_000012.12:c68161740-68159740	1846	1863	+	12.0921	4.31e-06	0.0171	ACTACAACACCCAAATGC
ESR1	hTFtarget	NC_000012.12:c68161740-68159740	888	903	+	14.8554	4.31e-06	0.0168	CACTGTATTTCTTTCC
CDK9	hTFtarget	NC_000012.12:c68161740-68159740	909	924	-	14.7692	4.32e-06	0.000824	AAAAAAGAAAAAAAGA
CTCF	hTFtarget	NC_000012.12:c68161740-68159740	995	1008	-	14.7273	4.34e-06	0.0172	CCAGAAGGTGGAGG
ZNF92	hTFtarget	NC_000012.12:c68161740-68159740	132	156	-	14.125	4.37e-06	0.000874	AATTTTTTTTTTTTTTTTTTTTTTT
SP2	hTFtarget	NC_000012.12:c68161740-68159740	140	155	-	14.5139	4.38e-06	0.000553	ATTTTTTTTTTTTTTT
IRF1	hTFtarget	NC_000012.12:c68161740-68159740	906	921	-	14.8831	4.4e-06	0.00237	AAAGAAAAAAAGAAAA
SRF	hTFtarget	NC_000012.12:c68161740-68159740	995	1008	-	14.7576	4.4e-06	0.0175	CCAGAAGGTGGAGG
GFI1B	hTFtarget	NC_000012.12:c68161740-68159740	229	240	-	14.3816	4.42e-06	0.0175	CAAGCTCTGCCT
ERG	hTFtarget	NC_000012.12:c68161740-68159740	303	327	-	-10.3289	4.42e-06	0.00184	CATTTCTTTTTTTTTTTTTTTTTTT
SMARCA4	hTFtarget	NC_000012.12:c68161740-68159740	917	932	-	14.6944	4.43e-06	0.000601	CAAAAAAAAAAAAAGA
CEBPB	hTFtarget	NC_000012.12:c68161740-68159740	252	263	+	14.8939	4.44e-06	0.0167	GATTGCGCCACT
CREB1	hTFtarget	NC_000012.12:c68161740-68159740	896	920	+	14.4189	4.44e-06	0.0168	TTCTTTCCTTTTTTCTTTTTTTCTT
MED1	hTFtarget	NC_000012.12:c68161740-68159740	1217	1225	+	15.3684	4.46e-06	0.0178	CCCCTGGGA
CDK9	hTFtarget	NC_000012.12:c68161740-68159740	1846	1861	+	13.2286	4.46e-06	0.0176	ACTACAACACCCAAAT
FLI1	hTFtarget	NC_000012.12:c68161740-68159740	896	920	-	-7.53947	4.47e-06	0.00243	AAGAAAAAAAGAAAAAAGGAAAGAA
HCFC1	hTFtarget	NC_000012.12:c68161740-68159740	1846	1861	+	12.6857	4.47e-06	0.0178	ACTACAACACCCAAAT
ZNF384	hTFtarget	NC_000012.12:c68161740-68159740	1071	1095	-	8.875	4.48e-06	0.00031	AAAAATACAAAAAAATTAGCCAGGC
FLI1	hTFtarget	NC_000012.12:c68161740-68159740	889	913	-	-7.55263	4.49e-06	0.00243	AAAGAAAAAAGGAAAGAAATACAGT
CTCF	hTFtarget	NC_000012.12:c68161740-68159740	995	1008	-	14.7424	4.49e-06	0.0178	CCAGAAGGTGGAGG
FLI1	hTFtarget	NC_000012.12:c68161740-68159740	905	929	-	9.33333	4.52e-06	0.00254	AAAAAAAAAAAGAAAAAAAGAAAAA
EZH2	hTFtarget	NC_000012.12:c68161740-68159740	905	926	-	12.8256	4.53e-06	0.00271	AAAAAAAAGAAAAAAAGAAAAA
BRD4	hTFtarget	NC_000012.12:c68161740-68159740	301	322	+	14.7821	4.54e-06	0.00173	AAAAAAAAAAAAAAAAAAAAAG
IRF1	hTFtarget	NC_000012.12:c68161740-68159740	913	928	-	14.8442	4.56e-06	0.00237	AAAAAAAAAAGAAAAA
RAD21	hTFtarget	NC_000012.12:c68161740-68159740	994	1009	-	14.5909	4.6e-06	0.0183	CCCAGAAGGTGGAGGT
IRF3	hTFtarget	NC_000012.12:c68161740-68159740	902	923	-	14.4507	4.61e-06	0.00156	AAAAAGAAAAAAAGAAAAAAGG
TAF1	hTFtarget	NC_000012.12:c68161740-68159740	196	211	+	14.1974	4.64e-06	0.0184	GAGGCTGAGGCGGGAG
IRF4	database	NC_000012.12:c68161740-68159740	132	147	+	14.8475	4.67e-06	0.000935	AAAAAAAAAAAAAAAA
IRF4	database	NC_000012.12:c68161740-68159740	133	148	+	14.8475	4.67e-06	0.000935	AAAAAAAAAAAAAAAA
IRF4	database	NC_000012.12:c68161740-68159740	134	149	+	14.8475	4.67e-06	0.000935	AAAAAAAAAAAAAAAA
IRF4	database	NC_000012.12:c68161740-68159740	135	150	+	14.8475	4.67e-06	0.000935	AAAAAAAAAAAAAAAA
IRF4	database	NC_000012.12:c68161740-68159740	136	151	+	14.8475	4.67e-06	0.000935	AAAAAAAAAAAAAAAA
IRF4	database	NC_000012.12:c68161740-68159740	137	152	+	14.8475	4.67e-06	0.000935	AAAAAAAAAAAAAAAA
IRF4	database	NC_000012.12:c68161740-68159740	138	153	+	14.8475	4.67e-06	0.000935	AAAAAAAAAAAAAAAA
IRF4	database	NC_000012.12:c68161740-68159740	139	154	+	14.8475	4.67e-06	0.000935	AAAAAAAAAAAAAAAA
IRF4	database	NC_000012.12:c68161740-68159740	301	316	+	14.8475	4.67e-06	0.000935	AAAAAAAAAAAAAAAA
IRF4	database	NC_000012.12:c68161740-68159740	302	317	+	14.8475	4.67e-06	0.000935	AAAAAAAAAAAAAAAA
IRF4	database	NC_000012.12:c68161740-68159740	303	318	+	14.8475	4.67e-06	0.000935	AAAAAAAAAAAAAAAA
IRF4	database	NC_000012.12:c68161740-68159740	304	319	+	14.8475	4.67e-06	0.000935	AAAAAAAAAAAAAAAA
IRF4	database	NC_000012.12:c68161740-68159740	305	320	+	14.8475	4.67e-06	0.000935	AAAAAAAAAAAAAAAA
IRF4	database	NC_000012.12:c68161740-68159740	306	321	+	14.8475	4.67e-06	0.000935	AAAAAAAAAAAAAAAA
RAD21	hTFtarget	NC_000012.12:c68161740-68159740	993	1008	+	14.6515	4.68e-06	0.0186	AACCTCCACCTTCTGG
NFIC	hTFtarget	NC_000012.12:c68161740-68159740	1361	1372	-	13.7778	4.69e-06	0.0179	AAGGTAAATATA
IRF1	hTFtarget	NC_000012.12:c68161740-68159740	914	929	-	14.8052	4.72e-06	0.00237	AAAAAAAAAAAGAAAA
IRF4	database	NC_000012.12:c68161740-68159740	132	147	+	14.7921	4.72e-06	0.00094	AAAAAAAAAAAAAAAA
IRF4	database	NC_000012.12:c68161740-68159740	133	148	+	14.7921	4.72e-06	0.00094	AAAAAAAAAAAAAAAA
IRF4	database	NC_000012.12:c68161740-68159740	134	149	+	14.7921	4.72e-06	0.00094	AAAAAAAAAAAAAAAA
IRF4	database	NC_000012.12:c68161740-68159740	135	150	+	14.7921	4.72e-06	0.00094	AAAAAAAAAAAAAAAA
IRF4	database	NC_000012.12:c68161740-68159740	136	151	+	14.7921	4.72e-06	0.00094	AAAAAAAAAAAAAAAA
IRF4	database	NC_000012.12:c68161740-68159740	137	152	+	14.7921	4.72e-06	0.00094	AAAAAAAAAAAAAAAA
IRF4	database	NC_000012.12:c68161740-68159740	138	153	+	14.7921	4.72e-06	0.00094	AAAAAAAAAAAAAAAA
IRF4	database	NC_000012.12:c68161740-68159740	139	154	+	14.7921	4.72e-06	0.00094	AAAAAAAAAAAAAAAA
IRF4	database	NC_000012.12:c68161740-68159740	301	316	+	14.7921	4.72e-06	0.00094	AAAAAAAAAAAAAAAA
IRF4	database	NC_000012.12:c68161740-68159740	302	317	+	14.7921	4.72e-06	0.00094	AAAAAAAAAAAAAAAA
IRF4	database	NC_000012.12:c68161740-68159740	303	318	+	14.7921	4.72e-06	0.00094	AAAAAAAAAAAAAAAA
IRF4	database	NC_000012.12:c68161740-68159740	304	319	+	14.7921	4.72e-06	0.00094	AAAAAAAAAAAAAAAA
IRF4	database	NC_000012.12:c68161740-68159740	305	320	+	14.7921	4.72e-06	0.00094	AAAAAAAAAAAAAAAA
IRF4	database	NC_000012.12:c68161740-68159740	306	321	+	14.7921	4.72e-06	0.00094	AAAAAAAAAAAAAAAA
IRF3	hTFtarget	NC_000012.12:c68161740-68159740	904	925	-	14.4085	4.73e-06	0.00156	AAAAAAAGAAAAAAAGAAAAAA
KDM5B	hTFtarget	NC_000012.12:c68161740-68159740	901	925	-	13.9487	4.73e-06	0.000987	AAAAAAAGAAAAAAAGAAAAAAGGA
SETDB1	hTFtarget	NC_000012.12:c68161740-68159740	1202	1217	-	14.6974	4.73e-06	0.0182	GGAGTTCCAGACGCAG
RAD21	hTFtarget	NC_000012.12:c68161740-68159740	994	1009	-	14.6667	4.74e-06	0.0188	CCCAGAAGGTGGAGGT
SPI1	hTFtarget	NC_000012.12:c68161740-68159740	994	1009	-	14.7632	4.76e-06	0.0189	CCCAGAAGGTGGAGGT
POLR2A	hTFtarget	NC_000012.12:c68161740-68159740	196	211	-	14.2105	4.78e-06	0.019	CTCCCGCCTCAGCCTC
ZNF92	hTFtarget	NC_000012.12:c68161740-68159740	125	149	-	13.9722	4.78e-06	0.000905	TTTTTTTTTTTTTTTTTTGTGCTAT
CTCF	hTFtarget	NC_000012.12:c68161740-68159740	994	1009	+	14.5909	4.8e-06	0.0191	ACCTCCACCTTCTGGG
EWSR1	hTFtarget	NC_000012.12:c68161740-68159740	1539	1558	-	11.3226	4.81e-06	0.0142	AAAGCAAGGAAAGAATGCGG
RXRG	hTFtarget	NC_000012.12:c68161740-68159740	994	1009	+	14.5571	4.83e-06	0.0192	ACCTCCACCTTCTGGG
IRF3	hTFtarget	NC_000012.12:c68161740-68159740	915	930	-	14.8052	4.84e-06	0.00424	AAAAAAAAAAAAGAAA
IRF3	hTFtarget	NC_000012.12:c68161740-68159740	310	325	+	14.8052	4.84e-06	0.00424	AAAAAAAAAAAAGAAA
POLR2A	hTFtarget	NC_000012.12:c68161740-68159740	196	207	+	14.9211	4.84e-06	0.0192	GAGGCTGAGGCG
IRF5	hTFtarget	NC_000012.12:c68161740-68159740	906	921	-	11.039	4.85e-06	0.000423	AAAGAAAAAAAGAAAA
EP300	hTFtarget	NC_000012.12:c68161740-68159740	192	216	-	13.7662	4.86e-06	0.019	CCATTCTCCCGCCTCAGCCTCCCGA
FLI1	hTFtarget	NC_000012.12:c68161740-68159740	1543	1558	+	-6.90909	4.87e-06	0.0189	ATTCTTTCCTTGCTTT
CTCF	hTFtarget	NC_000012.12:c68161740-68159740	994	1009	+	14.2273	4.87e-06	0.0194	ACCTCCACCTTCTGGG
ARID5B	database	NC_000012.12:c68161740-68159740	1425	1437	+	13.0297	4.88e-06	0.0193	GGCTTGTATTGTA
ARID5B	database	NC_000012.12:c68161740-68159740	1425	1437	+	13.0396	4.88e-06	0.0192	GGCTTGTATTGTA
POLR2A	hTFtarget	NC_000012.12:c68161740-68159740	196	211	-	14.3143	4.89e-06	0.0194	CTCCCGCCTCAGCCTC
TRIM24	hTFtarget	NC_000012.12:c68161740-68159740	136	157	+	14.359	4.91e-06	0.000771	AAAAAAAAAAAAAAAAAAATTA
EP300	hTFtarget	NC_000012.12:c68161740-68159740	487	495	-	14.4605	4.91e-06	0.018	TATGACTCA
HMGA1	database	NC_000012.12:c68161740-68159740	1717	1731	-	12.1765	4.94e-06	0.0177	ACTGGAAATTTTTTT
STAG1	hTFtarget	NC_000012.12:c68161740-68159740	994	1009	-	14.3939	4.94e-06	0.0196	CCCAGAAGGTGGAGGT
CTCF	hTFtarget	NC_000012.12:c68161740-68159740	994	1009	-	14.4091	4.95e-06	0.0196	CCCAGAAGGTGGAGGT
HIC2	database	NC_000012.12:c68161740-68159740	1786	1794	+	12.7449	4.95e-06	0.0197	GGTGGGCAT
CTCF	hTFtarget	NC_000012.12:c68161740-68159740	995	1008	-	14.4697	4.97e-06	0.0197	CCAGAAGGTGGAGG
ZFHX3	database	NC_000012.12:c68161740-68159740	1874	1884	-	14.9732	4.99e-06	0.0174	ATTAATAACTA
ZFHX3	database	NC_000012.12:c68161740-68159740	1874	1884	-	15.0693	4.99e-06	0.0174	ATTAATAACTA
ZNF143	hTFtarget	NC_000012.12:c68161740-68159740	303	323	+	14.0641	5.01e-06	0.00228	AAAAAAAAAAAAAAAAAAAGA
IRF3	hTFtarget	NC_000012.12:c68161740-68159740	888	909	-	14.3099	5.02e-06	0.00156	AAAAAAGGAAAGAAATACAGTG
CTCF	hTFtarget	NC_000012.12:c68161740-68159740	994	1009	-	13.9571	5.02e-06	0.0199	CCCAGAAGGTGGAGGT
RELA	hTFtarget	NC_000012.12:c68161740-68159740	1846	1861	+	13.4868	5.03e-06	0.0199	ACTACAACACCCAAAT
ERG	hTFtarget	NC_000012.12:c68161740-68159740	893	917	+	-10.9211	5.03e-06	0.00188	TATTTCTTTCCTTTTTTCTTTTTTT
CTCF	hTFtarget	NC_000012.12:c68161740-68159740	995	1008	-	14.4697	5.04e-06	0.0201	CCAGAAGGTGGAGG
THAP11	hTFtarget	NC_000012.12:c68161740-68159740	1846	1867	+	13.8816	5.05e-06	0.02	ACTACAACACCCAAATGCCACA
NANOG	hTFtarget	NC_000012.12:c68161740-68159740	712	727	-	14.4306	5.06e-06	0.0175	TCTTTGTCTTTCAGAT
TP53	hTFtarget	NC_000012.12:c68161740-68159740	890	911	+	14.1786	5.07e-06	0.0196	CTGTATTTCTTTCCTTTTTTCT
IRF3	hTFtarget	NC_000012.12:c68161740-68159740	299	323	+	13.7564	5.08e-06	0.000947	TCAAAAAAAAAAAAAAAAAAAAAGA
NANOG	hTFtarget	NC_000012.12:c68161740-68159740	717	728	+	13.3889	5.08e-06	0.0192	AAAGACAAAGAA
ZNF92	hTFtarget	NC_000012.12:c68161740-68159740	903	927	+	13.8611	5.1e-06	0.000917	CTTTTTTCTTTTTTTCTTTTTTTTT
GATA3	hTFtarget	NC_000012.12:c68161740-68159740	484	494	+	14.6447	5.12e-06	0.0203	GACTGAGTCAT
IRF4	database	NC_000012.12:c68161740-68159740	913	928	-	14.7288	5.15e-06	0.000979	AAAAAAAAAAGAAAAA
ESR1	hTFtarget	NC_000012.12:c68161740-68159740	1896	1917	-	13.9851	5.16e-06	0.0198	GATGGTGACAGATAGGCAGGGA
POLR2A	hTFtarget	NC_000012.12:c68161740-68159740	195	210	-	14.4211	5.16e-06	0.0127	TCCCGCCTCAGCCTCC
SP2	hTFtarget	NC_000012.12:c68161740-68159740	309	330	-	14.2692	5.16e-06	0.000953	AGTCATTTCTTTTTTTTTTTTT
IRF4	database	NC_000012.12:c68161740-68159740	913	928	-	14.6832	5.16e-06	0.000977	AAAAAAAAAAGAAAAA
SMC3	hTFtarget	NC_000012.12:c68161740-68159740	993	1008	-	14.303	5.19e-06	0.0206	CCAGAAGGTGGAGGTT
EP300	hTFtarget	NC_000012.12:c68161740-68159740	907	922	+	14.5	5.2e-06	0.0138	TTTCTTTTTTTCTTTT
EZH2	hTFtarget	NC_000012.12:c68161740-68159740	128	149	+	12.7093	5.24e-06	0.00271	GCACAAAAAAAAAAAAAAAAAA
HAND1	database	NC_000012.12:c68161740-68159740	1204	1215	+	14.3371	5.25e-06	0.0208	GCGTCTGGAACT
HAND1	database	NC_000012.12:c68161740-68159740	1204	1215	-	14.3163	5.25e-06	0.0208	AGTTCCAGACGC
IRF5	hTFtarget	NC_000012.12:c68161740-68159740	907	922	-	10.7922	5.26e-06	0.000448	AAAAGAAAAAAAGAAA
IRF3	hTFtarget	NC_000012.12:c68161740-68159740	308	332	+	13.6795	5.27e-06	0.000947	AAAAAAAAAAAAAAGAAATGACTAG
ESR1	hTFtarget	NC_000012.12:c68161740-68159740	1846	1861	+	14.5658	5.31e-06	0.0211	ACTACAACACCCAAAT
FLI1	hTFtarget	NC_000012.12:c68161740-68159740	889	913	-	8.92424	5.31e-06	0.00254	AAAGAAAAAAGGAAAGAAATACAGT
SPI1	hTFtarget	NC_000012.12:c68161740-68159740	992	1008	+	14.3816	5.32e-06	0.0211	CAACCTCCACCTTCTGG
TRIM28	hTFtarget	NC_000012.12:c68161740-68159740	39	54	-	9.43421	5.33e-06	0.0212	CCTTGGCCTCCCAAAG
ZNF143	hTFtarget	NC_000012.12:c68161740-68159740	1844	1859	-	10.8636	5.33e-06	0.0211	TTGGGTGTTGTAGTTA
E2F7	hTFtarget	NC_000012.12:c68161740-68159740	202	213	+	15.2632	5.34e-06	0.0212	GAGGCGGGAGAA
THAP11	hTFtarget	NC_000012.12:c68161740-68159740	1846	1862	+	12.7424	5.36e-06	0.0212	ACTACAACACCCAAATG
FLI1	hTFtarget	NC_000012.12:c68161740-68159740	1537	1561	-	8.89394	5.37e-06	0.00254	CAGAAAGCAAGGAAAGAATGCGGTT
STAG1	hTFtarget	NC_000012.12:c68161740-68159740	994	1009	+	14.2424	5.38e-06	0.0214	ACCTCCACCTTCTGGG
TFAP2C	hTFtarget	NC_000012.12:c68161740-68159740	995	1010	-	14.6711	5.38e-06	0.0214	ACCCAGAAGGTGGAGG
TCF3	database	NC_000012.12:c68161740-68159740	672	684	-	13.8209	5.39e-06	0.0202	CCTTTGTAATTTA
PAX5	hTFtarget	NC_000012.12:c68161740-68159740	907	922	+	14.0714	5.39e-06	0.0192	TTTCTTTTTTTCTTTT
IRF1	hTFtarget	NC_000012.12:c68161740-68159740	307	322	+	14.6494	5.4e-06	0.00237	AAAAAAAAAAAAAAAG
SIX5	hTFtarget	NC_000012.12:c68161740-68159740	1844	1859	-	12.2429	5.4e-06	0.0214	TTGGGTGTTGTAGTTA
SPI1	hTFtarget	NC_000012.12:c68161740-68159740	994	1009	+	14.6184	5.4e-06	0.0214	ACCTCCACCTTCTGGG
SP2	hTFtarget	NC_000012.12:c68161740-68159740	141	156	-	14.2917	5.42e-06	0.000661	AATTTTTTTTTTTTTT
RARA	hTFtarget	NC_000012.12:c68161740-68159740	67	75	+	12.8636	5.43e-06	0.0174	GAGGTCAGG
ZNF384	hTFtarget	NC_000012.12:c68161740-68159740	891	915	-	8.26389	5.44e-06	0.000371	AAAAAGAAAAAAGGAAAGAAATACA
ETS1	hTFtarget	NC_000012.12:c68161740-68159740	1844	1859	-	14.4342	5.46e-06	0.0216	TTGGGTGTTGTAGTTA
AR	hTFtarget	NC_000012.12:c68161740-68159740	259	270	+	14.5595	5.5e-06	0.0202	CCACTGCACTCC
RUNX1	hTFtarget	NC_000012.12:c68161740-68159740	1643	1654	-	14.5526	5.51e-06	0.0216	TGCTTGTGGTTG
HCFC1	hTFtarget	NC_000012.12:c68161740-68159740	1846	1857	+	14.6974	5.53e-06	0.022	ACTACAACACCC
SMC3	hTFtarget	NC_000012.12:c68161740-68159740	993	1008	+	13.7632	5.53e-06	0.0219	AACCTCCACCTTCTGG
SPI1	hTFtarget	NC_000012.12:c68161740-68159740	993	1008	-	14.1053	5.53e-06	0.022	CCAGAAGGTGGAGGTT
TP53	hTFtarget	NC_000012.12:c68161740-68159740	470	492	+	13.1818	5.53e-06	0.021	TTTACAGGTAAGGAGACTGAGTC
E2F6	hTFtarget	NC_000012.12:c68161740-68159740	202	213	+	15.1714	5.53e-06	0.0219	GAGGCGGGAGAA
IRF3	hTFtarget	NC_000012.12:c68161740-68159740	305	326	+	14.1408	5.55e-06	0.00156	AAAAAAAAAAAAAAAAAGAAAT
BCL6	hTFtarget	NC_000012.12:c68161740-68159740	899	910	+	14.1714	5.55e-06	0.0218	TTTCCTTTTTTC
ETS1	hTFtarget	NC_000012.12:c68161740-68159740	67	89	-	9.17143	5.56e-06	0.0146	GATGGTCTCGATCTCCTGACCTC
GATA4	hTFtarget	NC_000012.12:c68161740-68159740	202	210	+	14.9211	5.57e-06	0.0221	GAGGCGGGA
TP53	hTFtarget	NC_000012.12:c68161740-68159740	470	485	-	14.4079	5.57e-06	0.0207	TCTCCTTACCTGTAAA
SP2	hTFtarget	NC_000012.12:c68161740-68159740	905	920	+	14.2639	5.58e-06	0.000661	TTTTTCTTTTTTTCTT
RAD21	hTFtarget	NC_000012.12:c68161740-68159740	993	1008	-	14.4545	5.6e-06	0.0221	CCAGAAGGTGGAGGTT
CTCF	hTFtarget	NC_000012.12:c68161740-68159740	994	1009	+	14.1212	5.6e-06	0.0222	ACCTCCACCTTCTGGG
TAF3	hTFtarget	NC_000012.12:c68161740-68159740	1019	1034	-	14.6184	5.61e-06	0.0109	GGCTGAGGCAGGAGAA
IRF3	hTFtarget	NC_000012.12:c68161740-68159740	907	922	-	14.6104	5.62e-06	0.00424	AAAAGAAAAAAAGAAA
FLI1	hTFtarget	NC_000012.12:c68161740-68159740	898	915	-	-1.77273	5.63e-06	0.0107	AAAAAGAAAAAAGGAAAG
SP2	hTFtarget	NC_000012.12:c68161740-68159740	911	932	+	14.1667	5.65e-06	0.000977	TTTTTTTCTTTTTTTTTTTTTG
ZNF143	hTFtarget	NC_000012.12:c68161740-68159740	130	150	+	13.9359	5.65e-06	0.00229	ACAAAAAAAAAAAAAAAAAAA
SMARCA4	hTFtarget	NC_000012.12:c68161740-68159740	312	327	+	14.4028	5.68e-06	0.000741	AAAAAAAAAAGAAATG
SUZ12	hTFtarget	NC_000012.12:c68161740-68159740	196	211	-	14.1974	5.7e-06	0.0117	CTCCCGCCTCAGCCTC
GTF3C2	hTFtarget	NC_000012.12:c68161740-68159740	292	316	+	11.1948	5.72e-06	0.0017	CTCCGTCTCAAAAAAAAAAAAAAAA
CTCF	hTFtarget	NC_000012.12:c68161740-68159740	993	1008	-	14.303	5.72e-06	0.0227	CCAGAAGGTGGAGGTT
ZNF143	hTFtarget	NC_000012.12:c68161740-68159740	1844	1859	-	11.7273	5.73e-06	0.0227	TTGGGTGTTGTAGTTA
MYC	hTFtarget	NC_000012.12:c68161740-68159740	993	1008	+	14.2105	5.74e-06	0.0228	AACCTCCACCTTCTGG
POLR2A	hTFtarget	NC_000012.12:c68161740-68159740	1023	1038	+	14.3143	5.74e-06	0.0114	CCTGCCTCAGCCTCCC
SPI1	hTFtarget	NC_000012.12:c68161740-68159740	994	1009	+	14.0132	5.75e-06	0.0228	ACCTCCACCTTCTGGG
CTCF	hTFtarget	NC_000012.12:c68161740-68159740	994	1009	+	12.9868	5.75e-06	0.0228	ACCTCCACCTTCTGGG
OTX2	database	NC_000012.12:c68161740-68159740	25	39	-	14.0549	5.77e-06	0.0109	GTGCTGGGATTACAG
OTX2	database	NC_000012.12:c68161740-68159740	1177	1191	+	14.0549	5.77e-06	0.0109	GTGCTGGGATTACAG
SMAD1	hTFtarget	NC_000012.12:c68161740-68159740	993	1008	-	14.3636	5.77e-06	0.0227	CCAGAAGGTGGAGGTT
CTCF	hTFtarget	NC_000012.12:c68161740-68159740	994	1009	+	14.3485	5.77e-06	0.0229	ACCTCCACCTTCTGGG
OTX2	database	NC_000012.12:c68161740-68159740	25	39	+	14.05	5.79e-06	0.0109	CTGTAATCCCAGCAC
OTX2	database	NC_000012.12:c68161740-68159740	1177	1191	-	14.05	5.79e-06	0.0109	CTGTAATCCCAGCAC
GTF3C2	hTFtarget	NC_000012.12:c68161740-68159740	123	147	+	11.1558	5.82e-06	0.0017	AAATAGCACAAAAAAAAAAAAAAAA
ZNF143	hTFtarget	NC_000012.12:c68161740-68159740	1844	1863	-	10.2857	5.82e-06	0.023	GCATTTGGGTGTTGTAGTTA
ZNF143	hTFtarget	NC_000012.12:c68161740-68159740	158	173	+	14.3947	5.82e-06	0.00768	GCCGGGCGTGGCGAGT
FOXP1	database	NC_000012.12:c68161740-68159740	130	149	-	-2.2619	5.83e-06	0.00229	TTTTTTTTTTTTTTTTTTGT
IRF1	database	NC_000012.12:c68161740-68159740	893	913	+	14.2419	5.84e-06	0.0216	TATTTCTTTCCTTTTTTCTTT
SP2	hTFtarget	NC_000012.12:c68161740-68159740	304	325	-	14.1282	5.84e-06	0.000977	TTTCTTTTTTTTTTTTTTTTTT
RARG	database	NC_000012.12:c68161740-68159740	1142	1161	-	14.4694	5.87e-06	0.0125	CGGGTGGATCACAAGGTCAG
RAD21	hTFtarget	NC_000012.12:c68161740-68159740	993	1008	-	13.9	5.88e-06	0.0234	CCAGAAGGTGGAGGTT
SMC3	hTFtarget	NC_000012.12:c68161740-68159740	995	1010	+	14.1364	5.88e-06	0.0232	CCTCCACCTTCTGGGT
GTF2I	hTFtarget	NC_000012.12:c68161740-68159740	1856	1877	+	13.6974	5.89e-06	0.0232	CCAAATGCCACAAAACCTTAGT
KDM5B	hTFtarget	NC_000012.12:c68161740-68159740	994	1009	-	14.3286	5.89e-06	0.0234	CCCAGAAGGTGGAGGT
POLR2A	hTFtarget	NC_000012.12:c68161740-68159740	195	210	+	14.3289	5.9e-06	0.0122	GGAGGCTGAGGCGGGA
E2F6	hTFtarget	NC_000012.12:c68161740-68159740	198	213	-	14.9429	5.9e-06	0.0234	TTCTCCCGCCTCAGCC
SUZ12	hTFtarget	NC_000012.12:c68161740-68159740	1024	1039	+	14.1316	5.91e-06	0.0117	CTGCCTCAGCCTCCCT
CTCF	hTFtarget	NC_000012.12:c68161740-68159740	993	1008	-	14.2121	5.92e-06	0.0235	CCAGAAGGTGGAGGTT
CTCF	hTFtarget	NC_000012.12:c68161740-68159740	993	1008	-	14.2121	5.92e-06	0.0235	CCAGAAGGTGGAGGTT
RELA	hTFtarget	NC_000012.12:c68161740-68159740	1846	1863	-	13.9474	5.93e-06	0.0235	GCATTTGGGTGTTGTAGT
ETS1	hTFtarget	NC_000012.12:c68161740-68159740	994	1009	-	14.3684	5.97e-06	0.0237	CCCAGAAGGTGGAGGT
CTCF	hTFtarget	NC_000012.12:c68161740-68159740	994	1009	-	14.1667	5.97e-06	0.0237	CCCAGAAGGTGGAGGT
LMNB1	hTFtarget	NC_000012.12:c68161740-68159740	993	1008	+	14.5	5.99e-06	0.0238	AACCTCCACCTTCTGG
ASCL2	hTFtarget	NC_000012.12:c68161740-68159740	463	478	-	14.6447	6.02e-06	0.0238	ACCTGTAAAACTGGCT
SRF	hTFtarget	NC_000012.12:c68161740-68159740	681	692	+	14.4868	6.02e-06	0.0123	AAGGAGGAGAAA
MED1	hTFtarget	NC_000012.12:c68161740-68159740	900	915	+	14.3636	6.03e-06	0.00172	TTCCTTTTTTCTTTTT
MYOD1	hTFtarget	NC_000012.12:c68161740-68159740	276	284	-	14.6842	6.03e-06	0.023	CTGTCACCC
MRE11A	hTFtarget	NC_000012.12:c68161740-68159740	994	1009	-	14.3816	6.04e-06	0.024	CCCAGAAGGTGGAGGT
FOXA1	hTFtarget	NC_000012.12:c68161740-68159740	950	969	+	13.7273	6.07e-06	0.0239	GTCACCTAGGCTGGAGTGTA
KDM5B	hTFtarget	NC_000012.12:c68161740-68159740	303	327	+	13.4359	6.08e-06	0.00117	AAAAAAAAAAAAAAAAAAAGAAATG
CTCF	hTFtarget	NC_000012.12:c68161740-68159740	993	1008	-	14.197	6.08e-06	0.0242	CCAGAAGGTGGAGGTT
EZH2	hTFtarget	NC_000012.12:c68161740-68159740	297	318	+	12.5814	6.13e-06	0.00278	TCTCAAAAAAAAAAAAAAAAAA
CDK9	hTFtarget	NC_000012.12:c68161740-68159740	899	914	-	14.3718	6.13e-06	0.00111	AAAAGAAAAAAGGAAA
BRD4	hTFtarget	NC_000012.12:c68161740-68159740	124	148	+	14.4156	6.14e-06	0.00215	AATAGCACAAAAAAAAAAAAAAAAA
IRF5	hTFtarget	NC_000012.12:c68161740-68159740	902	917	-	10.3247	6.15e-06	0.000512	AAAAAAAGAAAAAAGG
STAG1	hTFtarget	NC_000012.12:c68161740-68159740	994	1009	+	13.9242	6.18e-06	0.0245	ACCTCCACCTTCTGGG
BRD4	hTFtarget	NC_000012.12:c68161740-68159740	128	149	+	14.359	6.21e-06	0.00215	GCACAAAAAAAAAAAAAAAAAA
CTCF	hTFtarget	NC_000012.12:c68161740-68159740	994	1009	-	13.7576	6.21e-06	0.0247	CCCAGAAGGTGGAGGT
CTCF	hTFtarget	NC_000012.12:c68161740-68159740	995	1008	+	14.0455	6.22e-06	0.0247	CCTCCACCTTCTGG
KDM5B	hTFtarget	NC_000012.12:c68161740-68159740	130	154	+	13.3846	6.23e-06	0.00117	ACAAAAAAAAAAAAAAAAAAAAAAA
FLI1	hTFtarget	NC_000012.12:c68161740-68159740	1542	1557	-	13.9931	6.24e-06	0.012	AAGCAAGGAAAGAATG
MED1	hTFtarget	NC_000012.12:c68161740-68159740	913	928	+	14.3247	6.24e-06	0.00172	TTTTTCTTTTTTTTTT
RAD21	hTFtarget	NC_000012.12:c68161740-68159740	994	1009	-	13.9848	6.28e-06	0.0249	CCCAGAAGGTGGAGGT
IRF3	hTFtarget	NC_000012.12:c68161740-68159740	909	930	-	13.9296	6.29e-06	0.00156	AAAAAAAAAAAAGAAAAAAAGA
RARG	database	NC_000012.12:c68161740-68159740	55	74	+	14.3776	6.3e-06	0.0125	CGGGCGGATCACGAGGTCAG
CTCF	hTFtarget	NC_000012.12:c68161740-68159740	994	1009	+	14.2121	6.3e-06	0.025	ACCTCCACCTTCTGGG
CTCF	hTFtarget	NC_000012.12:c68161740-68159740	994	1009	-	14.1212	6.31e-06	0.0251	CCCAGAAGGTGGAGGT
PAX5	hTFtarget	NC_000012.12:c68161740-68159740	155	169	-	14.02	6.32e-06	0.0251	GCCACGCCCGGCTAA
PRDM1	hTFtarget	NC_000012.12:c68161740-68159740	933	957	+	12.1558	6.32e-06	0.0239	AGACGGAATCTTACTCTGTCACCTA
E2F6	database	NC_000012.12:c68161740-68159740	203	213	+	15.0172	6.33e-06	0.0251	AGGCGGGAGAA
IRF3	hTFtarget	NC_000012.12:c68161740-68159740	301	322	+	13.9155	6.34e-06	0.00156	AAAAAAAAAAAAAAAAAAAAAG
CTCF	hTFtarget	NC_000012.12:c68161740-68159740	994	1008	-	14.0152	6.34e-06	0.0252	CCAGAAGGTGGAGGT
SRF	hTFtarget	NC_000012.12:c68161740-68159740	3	27	+	14.0361	6.36e-06	0.0252	GGCCGGGTGCGGTGGCTCACGCCTG
ARID3A	hTFtarget	NC_000012.12:c68161740-68159740	994	1009	+	14.1316	6.37e-06	0.0253	ACCTCCACCTTCTGGG
CTCF	hTFtarget	NC_000012.12:c68161740-68159740	993	1008	-	14.1212	6.37e-06	0.0253	CCAGAAGGTGGAGGTT
ZNF143	hTFtarget	NC_000012.12:c68161740-68159740	118	142	-	13.6282	6.44e-06	0.00158	TTTTTTTTTTTGTGCTATTTTTAGT
GTF3C2	hTFtarget	NC_000012.12:c68161740-68159740	124	148	+	10.9091	6.49e-06	0.00174	AATAGCACAAAAAAAAAAAAAAAAA
SRF	hTFtarget	NC_000012.12:c68161740-68159740	895	906	-	14.4342	6.49e-06	0.0123	AAAGGAAAGAAA
ZNF143	hTFtarget	NC_000012.12:c68161740-68159740	301	325	-	13.6154	6.53e-06	0.00158	TTTCTTTTTTTTTTTTTTTTTTTTT
CTCF	hTFtarget	NC_000012.12:c68161740-68159740	993	1008	-	14.1061	6.53e-06	0.0258	CCAGAAGGTGGAGGTT
CTCF	hTFtarget	NC_000012.12:c68161740-68159740	994	1009	-	13.8788	6.53e-06	0.0259	CCCAGAAGGTGGAGGT
POLR2A	hTFtarget	NC_000012.12:c68161740-68159740	195	210	-	14.0143	6.58e-06	0.0261	TCCCGCCTCAGCCTCC
CTCF	hTFtarget	NC_000012.12:c68161740-68159740	994	1009	-	13.803	6.58e-06	0.0261	CCCAGAAGGTGGAGGT
CTCF	hTFtarget	NC_000012.12:c68161740-68159740	994	1007	-	14.3485	6.58e-06	0.0262	CAGAAGGTGGAGGT
ZNF143	hTFtarget	NC_000012.12:c68161740-68159740	291	315	-	13.6026	6.61e-06	0.00158	TTTTTTTTTTTTTTTGAGACGGAGT
ZNF143	hTFtarget	NC_000012.12:c68161740-68159740	889	909	-	13.7692	6.61e-06	0.00229	AAAAAAGGAAAGAAATACAGT
RBL2	hTFtarget	NC_000012.12:c68161740-68159740	202	213	-	14.8421	6.62e-06	0.0264	TTCTCCCGCCTC
CTCF	hTFtarget	NC_000012.12:c68161740-68159740	995	1009	+	14.1515	6.62e-06	0.0263	CCTCCACCTTCTGGG
EBF1	database	NC_000012.12:c68161740-68159740	1215	1226	-	14.5	6.64e-06	0.0264	TTCCCAGGGGGA
E2F6	hTFtarget	NC_000012.12:c68161740-68159740	202	212	+	14.8857	6.65e-06	0.0265	GAGGCGGGAGA
ARID3A	hTFtarget	NC_000012.12:c68161740-68159740	993	1008	+	14.2763	6.66e-06	0.0265	AACCTCCACCTTCTGG
CTCF	hTFtarget	NC_000012.12:c68161740-68159740	1990	2001	+	14.25	6.66e-06	0.0265	GGAGGTGCAGCA
EBF1	database	NC_000012.12:c68161740-68159740	1215	1226	-	14.5517	6.67e-06	0.0266	TTCCCAGGGGGA
FLI1	hTFtarget	NC_000012.12:c68161740-68159740	902	926	+	-37.2121	6.67e-06	0.00938	CCTTTTTTCTTTTTTTCTTTTTTTT
CTCF	hTFtarget	NC_000012.12:c68161740-68159740	994	1009	+	13.7576	6.67e-06	0.0265	ACCTCCACCTTCTGGG
ZNF92	hTFtarget	NC_000012.12:c68161740-68159740	128	152	-	13.3889	6.69e-06	0.00115	TTTTTTTTTTTTTTTTTTTTTGTGC
CTCF	hTFtarget	NC_000012.12:c68161740-68159740	994	1009	+	13.8939	6.69e-06	0.0266	ACCTCCACCTTCTGGG
TP53	hTFtarget	NC_000012.12:c68161740-68159740	1896	1911	-	13.7941	6.73e-06	0.0258	GACAGATAGGCAGGGA
ZNF92	hTFtarget	NC_000012.12:c68161740-68159740	1553	1568	+	14.2381	6.73e-06	0.026	TGCTTTCTGGTCATTT
CTCF	hTFtarget	NC_000012.12:c68161740-68159740	996	1008	+	14.2273	6.75e-06	0.0268	CTCCACCTTCTGG
CTCF	hTFtarget	NC_000012.12:c68161740-68159740	993	1008	+	13.8939	6.75e-06	0.0268	AACCTCCACCTTCTGG
BCL6	hTFtarget	NC_000012.12:c68161740-68159740	1846	1867	-	14.1974	6.78e-06	0.0268	TGTGGCATTTGGGTGTTGTAGT
ERG	hTFtarget	NC_000012.12:c68161740-68159740	903	927	+	-12.3158	6.79e-06	0.00231	CTTTTTTCTTTTTTTCTTTTTTTTT
STAG1	hTFtarget	NC_000012.12:c68161740-68159740	994	1009	-	14.0816	6.8e-06	0.027	CCCAGAAGGTGGAGGT
GTF3C2	hTFtarget	NC_000012.12:c68161740-68159740	1109	1124	-	14.3684	6.81e-06	0.0269	AGCCAATATGGTGAAA
RAD21	hTFtarget	NC_000012.12:c68161740-68159740	993	1008	+	14.0606	6.83e-06	0.0271	AACCTCCACCTTCTGG
STAT1	hTFtarget	NC_000012.12:c68161740-68159740	724	741	+	13.9718	6.86e-06	0.0258	AAGAAATAAAAAGTTAAA
ZNF143	hTFtarget	NC_000012.12:c68161740-68159740	1109	1130	-	13.6974	6.89e-06	0.0272	CAGCCTAGCCAATATGGTGAAA
FLI1	hTFtarget	NC_000012.12:c68161740-68159740	892	913	+	10.4697	6.92e-06	0.00659	GTATTTCTTTCCTTTTTTCTTT
POLR2A	hTFtarget	NC_000012.12:c68161740-68159740	1024	1039	+	13.7237	6.94e-06	0.00916	CTGCCTCAGCCTCCCT
KDM5B	hTFtarget	NC_000012.12:c68161740-68159740	304	328	+	13.1538	6.96e-06	0.00125	AAAAAAAAAAAAAAAAAAGAAATGA
MAZ	hTFtarget	NC_000012.12:c68161740-68159740	994	1009	+	13.6316	6.96e-06	0.0277	ACCTCCACCTTCTGGG
YY1	hTFtarget	NC_000012.12:c68161740-68159740	196	211	-	12.6579	6.96e-06	0.0276	CTCCCGCCTCAGCCTC
RUNX2	hTFtarget	NC_000012.12:c68161740-68159740	1421	1436	-	13.8485	6.97e-06	0.0276	ACAATACAAGCCACAC
GTF2I	hTFtarget	NC_000012.12:c68161740-68159740	1006	1025	-	13.4342	6.98e-06	0.0276	AGGAGAATGGCTTGAACCCA
FOXP1	database	NC_000012.12:c68161740-68159740	912	931	+	-3.11905	7e-06	0.00229	TTTTTTCTTTTTTTTTTTTT
IRF3	hTFtarget	NC_000012.12:c68161740-68159740	131	152	+	13.7465	7e-06	0.00156	CAAAAAAAAAAAAAAAAAAAAA
IRF3	hTFtarget	NC_000012.12:c68161740-68159740	300	321	+	13.7465	7e-06	0.00156	CAAAAAAAAAAAAAAAAAAAAA
SP1	hTFtarget	NC_000012.12:c68161740-68159740	161	169	-	14.9605	7e-06	0.0278	GCCACGCCC
TFAP2A	hTFtarget	NC_000012.12:c68161740-68159740	161	169	-	15.0658	7e-06	0.0279	GCCACGCCC
FOXP1	database	NC_000012.12:c68161740-68159740	309	328	-	-3.13095	7.02e-06	0.00229	TCATTTCTTTTTTTTTTTTT
POLR2A	hTFtarget	NC_000012.12:c68161740-68159740	1024	1039	+	13.2632	7.02e-06	0.0223	CTGCCTCAGCCTCCCT
KDM5B	hTFtarget	NC_000012.12:c68161740-68159740	912	927	+	14.5417	7.03e-06	0.00342	TTTTTTCTTTTTTTTT
POLR3A	hTFtarget	NC_000012.12:c68161740-68159740	1128	1149	+	10.5857	7.03e-06	0.0225	CTGGTCTCAAACTCCTGACCTT
SPI1	hTFtarget	NC_000012.12:c68161740-68159740	994	1009	-	14.1974	7.04e-06	0.028	CCCAGAAGGTGGAGGT
CTCF	hTFtarget	NC_000012.12:c68161740-68159740	994	1008	-	13.7879	7.06e-06	0.0281	CCAGAAGGTGGAGGT
ZNF384	hTFtarget	NC_000012.12:c68161740-68159740	887	911	-	7.43056	7.07e-06	0.000473	AGAAAAAAGGAAAGAAATACAGTGT
CTCF	hTFtarget	NC_000012.12:c68161740-68159740	994	1009	+	13.7879	7.09e-06	0.0282	ACCTCCACCTTCTGGG
GTF3C2	hTFtarget	NC_000012.12:c68161740-68159740	128	152	+	10.7013	7.11e-06	0.00176	GCACAAAAAAAAAAAAAAAAAAAAA
EWSR1	hTFtarget	NC_000012.12:c68161740-68159740	896	911	-	11.1714	7.11e-06	0.0269	AGAAAAAAGGAAAGAA
CTCF	hTFtarget	NC_000012.12:c68161740-68159740	994	1009	-	13.7121	7.11e-06	0.0283	CCCAGAAGGTGGAGGT
MED1	hTFtarget	NC_000012.12:c68161740-68159740	904	919	-	14.1948	7.12e-06	0.00319	AGAAAAAAAGAAAAAA
MAZ	hTFtarget	NC_000012.12:c68161740-68159740	190	211	+	13.2429	7.13e-06	0.028	ACTCGGGAGGCTGAGGCGGGAG
ZNF143	hTFtarget	NC_000012.12:c68161740-68159740	1844	1862	+	10.5455	7.13e-06	0.0283	TAACTACAACACCCAAATG
RAD21	hTFtarget	NC_000012.12:c68161740-68159740	993	1008	-	14.0758	7.14e-06	0.0283	CCAGAAGGTGGAGGTT
CTCF	hTFtarget	NC_000012.12:c68161740-68159740	994	1009	+	13.8788	7.14e-06	0.0284	ACCTCCACCTTCTGGG
HCFC1	hTFtarget	NC_000012.12:c68161740-68159740	1846	1861	+	13.5789	7.18e-06	0.0284	ACTACAACACCCAAAT
IRF5	hTFtarget	NC_000012.12:c68161740-68159740	960	981	-	13.6104	7.18e-06	0.00568	AGATCGCGCCACTACACTCCAG
NFE2	hTFtarget	NC_000012.12:c68161740-68159740	258	279	+	14.0513	7.18e-06	0.0121	GCCACTGCACTCCAGCCTGGGT
POLR3A	hTFtarget	NC_000012.12:c68161740-68159740	906	921	-	13.9872	7.18e-06	0.000784	AAAGAAAAAAAGAAAA
RARG	hTFtarget	NC_000012.12:c68161740-68159740	66	74	-	13.7	7.18e-06	0.0286	CTGACCTCG
RBL2	hTFtarget	NC_000012.12:c68161740-68159740	204	212	+	14.5132	7.18e-06	0.0286	GGCGGGAGA
E2F4	hTFtarget	NC_000012.12:c68161740-68159740	204	212	+	14.7763	7.18e-06	0.0286	GGCGGGAGA
ZEB1	hTFtarget	NC_000012.12:c68161740-68159740	1781	1791	-	14.5455	7.19e-06	0.0286	CCCACCTGTGC
ESR1	hTFtarget	NC_000012.12:c68161740-68159740	1844	1859	+	12.75	7.2e-06	0.0285	TAACTACAACACCCAA
CTCF	hTFtarget	NC_000012.12:c68161740-68159740	994	1007	-	14.2879	7.2e-06	0.0286	CAGAAGGTGGAGGT
MYC	hTFtarget	NC_000012.12:c68161740-68159740	994	1009	-	14.1579	7.21e-06	0.0286	CCCAGAAGGTGGAGGT
MYH11	hTFtarget	NC_000012.12:c68161740-68159740	987	1002	-	13.6579	7.21e-06	0.0285	GGTGGAGGTTGCAGTG
BTAF1	hTFtarget	NC_000012.12:c68161740-68159740	895	910	-	14.1154	7.21e-06	0.000555	GAAAAAAGGAAAGAAA
CDK7	hTFtarget	NC_000012.12:c68161740-68159740	193	208	-	13.9079	7.22e-06	0.0286	CCGCCTCAGCCTCCCG
CTCF	hTFtarget	NC_000012.12:c68161740-68159740	994	1009	+	13.7121	7.22e-06	0.0287	ACCTCCACCTTCTGGG
CTCF	hTFtarget	NC_000012.12:c68161740-68159740	993	1008	-	13.9091	7.23e-06	0.0287	CCAGAAGGTGGAGGTT
CTCF	hTFtarget	NC_000012.12:c68161740-68159740	995	1009	-	13.7879	7.24e-06	0.0288	CCCAGAAGGTGGAGG
NOTCH1	hTFtarget	NC_000012.12:c68161740-68159740	1844	1859	-	11.8429	7.25e-06	0.0287	TTGGGTGTTGTAGTTA
POLR2A	hTFtarget	NC_000012.12:c68161740-68159740	44	59	+	13.9737	7.26e-06	0.0122	GGAGGCCAAGGCGGGC
SIX5	hTFtarget	NC_000012.12:c68161740-68159740	1846	1861	+	13.4474	7.29e-06	0.0289	ACTACAACACCCAAAT
IRF1	hTFtarget	NC_000012.12:c68161740-68159740	903	918	-	14.2987	7.31e-06	0.00237	GAAAAAAAGAAAAAAG
EWSR1	hTFtarget	NC_000012.12:c68161740-68159740	895	914	-	10.3871	7.33e-06	0.0142	AAAAGAAAAAAGGAAAGAAA
ESR2	hTFtarget	NC_000012.12:c68161740-68159740	486	494	-	13.9857	7.34e-06	0.0287	ATGACTCAG
ESR2	hTFtarget	NC_000012.12:c68161740-68159740	486	494	-	14.25	7.34e-06	0.0274	ATGACTCAG
FOS	hTFtarget	NC_000012.12:c68161740-68159740	486	494	-	14.5857	7.34e-06	0.0291	ATGACTCAG
JUN	hTFtarget	NC_000012.12:c68161740-68159740	486	494	-	15.0789	7.34e-06	0.028	ATGACTCAG
MYC	hTFtarget	NC_000012.12:c68161740-68159740	899	913	+	14.0519	7.34e-06	0.0118	TTTCCTTTTTTCTTT
NFIC	hTFtarget	NC_000012.12:c68161740-68159740	382	390	+	13.0857	7.34e-06	0.029	TGCCAGGAA
NR3C1	hTFtarget	NC_000012.12:c68161740-68159740	486	494	-	14.5789	7.34e-06	0.0291	ATGACTCAG
REST	hTFtarget	NC_000012.12:c68161740-68159740	1220	1228	-	11.7714	7.34e-06	0.028	TATTCCCAG
SMAD3	hTFtarget	NC_000012.12:c68161740-68159740	486	494	-	14.5857	7.34e-06	0.0283	ATGACTCAG
SMARCC1	hTFtarget	NC_000012.12:c68161740-68159740	486	494	+	14.9429	7.34e-06	0.0291	CTGAGTCAT
SMARCC1	hTFtarget	NC_000012.12:c68161740-68159740	486	494	-	15.0571	7.34e-06	0.0292	ATGACTCAG
SPI1	hTFtarget	NC_000012.12:c68161740-68159740	486	494	-	14.5132	7.34e-06	0.0273	ATGACTCAG
TP53	hTFtarget	NC_000012.12:c68161740-68159740	895	916	-	2.06944	7.34e-06	0.00521	AAAAAAGAAAAAAGGAAAGAAA
EP300	hTFtarget	NC_000012.12:c68161740-68159740	486	494	-	14.9848	7.34e-06	0.0288	ATGACTCAG
SMAD2:SMAD3:SMAD4	database	NC_000012.12:c68161740-68159740	1190	1202	-	14.3934	7.35e-06	0.0291	GTGGCTCACACCT
SRC	hTFtarget	NC_000012.12:c68161740-68159740	611	622	-	14.0132	7.35e-06	0.0146	GGTTCAAACCCA
SRF	hTFtarget	NC_000012.12:c68161740-68159740	994	1009	-	13.303	7.35e-06	0.0292	CCCAGAAGGTGGAGGT
ZNF384	hTFtarget	NC_000012.12:c68161740-68159740	722	746	+	7.30556	7.35e-06	0.000482	CAAAGAAATAAAAAGTTAAAAAGAT
ZNF92	hTFtarget	NC_000012.12:c68161740-68159740	898	922	+	13.2222	7.35e-06	0.0012	CTTTCCTTTTTTCTTTTTTTCTTTT
FLI1	hTFtarget	NC_000012.12:c68161740-68159740	898	922	+	-37.7879	7.36e-06	0.00938	CTTTCCTTTTTTCTTTTTTTCTTTT
SP2	hTFtarget	NC_000012.12:c68161740-68159740	1194	1209	+	14.2237	7.36e-06	0.00584	GTGAGCCACTGCGTCT
CTCF	hTFtarget	NC_000012.12:c68161740-68159740	994	1009	+	13.8143	7.36e-06	0.0292	ACCTCCACCTTCTGGG
ETS1	hTFtarget	NC_000012.12:c68161740-68159740	999	1021	-	8.27143	7.37e-06	0.0146	GAATGGCTTGAACCCAGAAGGTG
SIX5	hTFtarget	NC_000012.12:c68161740-68159740	1846	1861	+	13.2895	7.39e-06	0.0293	ACTACAACACCCAAAT
CDK8	hTFtarget	NC_000012.12:c68161740-68159740	132	147	-	14.0519	7.39e-06	0.0017	TTTTTTTTTTTTTTTT
CDK8	hTFtarget	NC_000012.12:c68161740-68159740	133	148	-	14.0519	7.39e-06	0.0017	TTTTTTTTTTTTTTTT
CDK8	hTFtarget	NC_000012.12:c68161740-68159740	134	149	-	14.0519	7.39e-06	0.0017	TTTTTTTTTTTTTTTT
CDK8	hTFtarget	NC_000012.12:c68161740-68159740	135	150	-	14.0519	7.39e-06	0.0017	TTTTTTTTTTTTTTTT
CDK8	hTFtarget	NC_000012.12:c68161740-68159740	136	151	-	14.0519	7.39e-06	0.0017	TTTTTTTTTTTTTTTT
CDK8	hTFtarget	NC_000012.12:c68161740-68159740	137	152	-	14.0519	7.39e-06	0.0017	TTTTTTTTTTTTTTTT
CDK8	hTFtarget	NC_000012.12:c68161740-68159740	138	153	-	14.0519	7.39e-06	0.0017	TTTTTTTTTTTTTTTT
CDK8	hTFtarget	NC_000012.12:c68161740-68159740	139	154	-	14.0519	7.39e-06	0.0017	TTTTTTTTTTTTTTTT
CDK8	hTFtarget	NC_000012.12:c68161740-68159740	301	316	-	14.0519	7.39e-06	0.0017	TTTTTTTTTTTTTTTT
CDK8	hTFtarget	NC_000012.12:c68161740-68159740	302	317	-	14.0519	7.39e-06	0.0017	TTTTTTTTTTTTTTTT
CDK8	hTFtarget	NC_000012.12:c68161740-68159740	303	318	-	14.0519	7.39e-06	0.0017	TTTTTTTTTTTTTTTT
CDK8	hTFtarget	NC_000012.12:c68161740-68159740	304	319	-	14.0519	7.39e-06	0.0017	TTTTTTTTTTTTTTTT
CDK8	hTFtarget	NC_000012.12:c68161740-68159740	305	320	-	14.0519	7.39e-06	0.0017	TTTTTTTTTTTTTTTT
CDK8	hTFtarget	NC_000012.12:c68161740-68159740	306	321	-	14.0519	7.39e-06	0.0017	TTTTTTTTTTTTTTTT
TRIM24	hTFtarget	NC_000012.12:c68161740-68159740	135	156	+	13.8333	7.41e-06	0.00111	AAAAAAAAAAAAAAAAAAAATT
CTCF	hTFtarget	NC_000012.12:c68161740-68159740	995	1008	-	13.8939	7.44e-06	0.0296	CCAGAAGGTGGAGG
RAD21	hTFtarget	NC_000012.12:c68161740-68159740	993	1008	-	13.9091	7.45e-06	0.0295	CCAGAAGGTGGAGGTT
KDM1A	hTFtarget	NC_000012.12:c68161740-68159740	224	245	+	13.7606	7.46e-06	0.00583	CCGGGAGGCAGAGCTTGCAGTG
TFAP2D	database	NC_000012.12:c68161740-68159740	197	210	-	12.9388	7.46e-06	0.0212	TCCCGCCTCAGCCT
STAT5A	hTFtarget	NC_000012.12:c68161740-68159740	684	699	+	11.1842	7.48e-06	0.029	GAGGAGAAAGAATCCT
POU2F1	hTFtarget	NC_000012.12:c68161740-68159740	1736	1753	+	13.7532	7.49e-06	0.029	GAATGGTGTGAAGTAAAA
CTCF	hTFtarget	NC_000012.12:c68161740-68159740	994	1009	+	13.6818	7.49e-06	0.0298	ACCTCCACCTTCTGGG
BCL6	hTFtarget	NC_000012.12:c68161740-68159740	1846	1861	+	11.8421	7.5e-06	0.0297	ACTACAACACCCAAAT
ERG	hTFtarget	NC_000012.12:c68161740-68159740	302	326	-	-12.7895	7.5e-06	0.00234	ATTTCTTTTTTTTTTTTTTTTTTTT
CEBPB	hTFtarget	NC_000012.12:c68161740-68159740	252	263	+	14.6364	7.52e-06	0.0277	GATTGCGCCACT
CTCF	hTFtarget	NC_000012.12:c68161740-68159740	991	1008	+	13.8636	7.52e-06	0.0298	GCAACCTCCACCTTCTGG
SMARCA4	hTFtarget	NC_000012.12:c68161740-68159740	299	314	+	14.0556	7.53e-06	0.000948	TCAAAAAAAAAAAAAA
BRF1	database	NC_000012.12:c68161740-68159740	611	623	-	14.1429	7.57e-06	0.0283	TGGTTCAAACCCA
EZH2	hTFtarget	NC_000012.12:c68161740-68159740	303	324	+	12.407	7.57e-06	0.00298	AAAAAAAAAAAAAAAAAAAGAA
CTCF	hTFtarget	NC_000012.12:c68161740-68159740	991	1008	+	13.8485	7.57e-06	0.03	GCAACCTCCACCTTCTGG
SPI1	hTFtarget	NC_000012.12:c68161740-68159740	997	1008	-	14.1	7.59e-06	0.0302	CCAGAAGGTGGA
RUNX1	hTFtarget	NC_000012.12:c68161740-68159740	1642	1653	+	13.9697	7.61e-06	0.0303	CCAACCACAAGC
CTCF	hTFtarget	NC_000012.12:c68161740-68159740	994	1009	+	13.5758	7.61e-06	0.0302	ACCTCCACCTTCTGGG
IRF5	hTFtarget	NC_000012.12:c68161740-68159740	904	919	-	9.63636	7.62e-06	0.00062	AGAAAAAAAGAAAAAA
CTCF	hTFtarget	NC_000012.12:c68161740-68159740	994	1009	-	13.4242	7.62e-06	0.0303	CCCAGAAGGTGGAGGT
CDK8	hTFtarget	NC_000012.12:c68161740-68159740	908	923	+	14.013	7.63e-06	0.0017	TTCTTTTTTTCTTTTT
CTCF	hTFtarget	NC_000012.12:c68161740-68159740	990	1008	+	13.5909	7.63e-06	0.0303	TGCAACCTCCACCTTCTGG
SPI1	hTFtarget	NC_000012.12:c68161740-68159740	1846	1857	+	14.3421	7.64e-06	0.0304	ACTACAACACCC
SMAD2/SMAD3	hTFtarget	NC_000012.12:c68161740-68159740	1190	1201	+	14.2571	7.66e-06	0.0304	AGGTGTGAGCCA
TCF4	hTFtarget	NC_000012.12:c68161740-68159740	712	726	+	13.9059	7.69e-06	0.0268	ATCTGAAAGACAAAG
CTCF	hTFtarget	NC_000012.12:c68161740-68159740	995	1008	-	13.5758	7.7e-06	0.0306	CCAGAAGGTGGAGG
ATF3	hTFtarget	NC_000012.12:c68161740-68159740	1844	1859	+	14.0395	7.72e-06	0.0306	TAACTACAACACCCAA
SPI1	hTFtarget	NC_000012.12:c68161740-68159740	994	1009	+	13.6316	7.72e-06	0.0307	ACCTCCACCTTCTGGG
ETS1	hTFtarget	NC_000012.12:c68161740-68159740	1844	1862	-	10.8143	7.73e-06	0.0306	CATTTGGGTGTTGTAGTTA
KLF4	hTFtarget	NC_000012.12:c68161740-68159740	64	75	+	14.1316	7.73e-06	0.0308	CACGAGGTCAGG
STAG1	hTFtarget	NC_000012.12:c68161740-68159740	993	1008	+	13.5758	7.73e-06	0.0307	AACCTCCACCTTCTGG
TRIM28	hTFtarget	NC_000012.12:c68161740-68159740	895	908	-	10.7763	7.73e-06	0.0294	AAAAAGGAAAGAAA
POLR3A	hTFtarget	NC_000012.12:c68161740-68159740	189	210	-	9.88158	7.75e-06	0.0102	TCCCGCCTCAGCCTCCCGAGTA
CTCF	hTFtarget	NC_000012.12:c68161740-68159740	993	1008	+	13.8333	7.77e-06	0.0308	AACCTCCACCTTCTGG
SMAD3	hTFtarget	NC_000012.12:c68161740-68159740	1190	1201	+	14.3286	7.78e-06	0.0309	AGGTGTGAGCCA
CTCF	hTFtarget	NC_000012.12:c68161740-68159740	994	1009	+	13.5303	7.78e-06	0.0309	ACCTCCACCTTCTGGG
TRIM24	hTFtarget	NC_000012.12:c68161740-68159740	909	930	-	13.7692	7.79e-06	0.00112	AAAAAAAAAAAAGAAAAAAAGA
E2F7	hTFtarget	NC_000012.12:c68161740-68159740	202	213	+	14.7763	7.81e-06	0.0311	GAGGCGGGAGAA
TP53	hTFtarget	NC_000012.12:c68161740-68159740	905	926	-	1.81944	7.82e-06	0.00521	AAAAAAAAGAAAAAAAGAAAAA
CTCF	hTFtarget	NC_000012.12:c68161740-68159740	992	1008	+	13.7727	7.82e-06	0.031	CAACCTCCACCTTCTGG
EZH1	hTFtarget	NC_000012.12:c68161740-68159740	1725	1736	-	14.2857	7.85e-06	0.0309	CAAGGACTGGAA
E2F3	database	NC_000012.12:c68161740-68159740	197	211	-	14.5517	7.86e-06	0.0312	CTCCCGCCTCAGCCT
TCF12	hTFtarget	NC_000012.12:c68161740-68159740	712	727	+	14.0385	7.87e-06	0.0276	ATCTGAAAGACAAAGA
ZNF143	hTFtarget	NC_000012.12:c68161740-68159740	911	931	-	13.5769	7.89e-06	0.00229	AAAAAAAAAAAAAGAAAAAAA
CTCF	hTFtarget	NC_000012.12:c68161740-68159740	989	1008	-	13.0152	7.89e-06	0.0313	CCAGAAGGTGGAGGTTGCAG
CTCF	hTFtarget	NC_000012.12:c68161740-68159740	993	1008	+	13.803	7.9e-06	0.0314	AACCTCCACCTTCTGG
FLI1	hTFtarget	NC_000012.12:c68161740-68159740	904	928	-	7.89394	7.92e-06	0.00333	AAAAAAAAAAGAAAAAAAGAAAAAA
CTCF	hTFtarget	NC_000012.12:c68161740-68159740	994	1009	+	13.3636	7.94e-06	0.0316	ACCTCCACCTTCTGGG
TP53	hTFtarget	NC_000012.12:c68161740-68159740	911	932	-	1.75	7.96e-06	0.00521	CAAAAAAAAAAAAAGAAAAAAA
CTCF	hTFtarget	NC_000012.12:c68161740-68159740	995	1010	+	13.7727	7.97e-06	0.0317	CCTCCACCTTCTGGGT
ETS1	hTFtarget	NC_000012.12:c68161740-68159740	1844	1859	-	13.3816	7.99e-06	0.0317	TTGGGTGTTGTAGTTA
CEBPB	hTFtarget	NC_000012.12:c68161740-68159740	252	263	+	14.6212	7.99e-06	0.0306	GATTGCGCCACT
CEBPD	database	NC_000012.12:c68161740-68159740	253	263	-	12.6627	8.02e-06	0.0309	AGTGGCGCAAT
CEBPD	database	NC_000012.12:c68161740-68159740	253	263	-	12.65	8.02e-06	0.0306	AGTGGCGCAAT
CTCF	hTFtarget	NC_000012.12:c68161740-68159740	993	1008	+	13.7879	8.04e-06	0.0318	AACCTCCACCTTCTGG
IRF3	hTFtarget	NC_000012.12:c68161740-68159740	914	929	-	14.1299	8.05e-06	0.00507	AAAAAAAAAAAGAAAA
CTCF	hTFtarget	NC_000012.12:c68161740-68159740	994	1009	-	13.2576	8.05e-06	0.032	CCCAGAAGGTGGAGGT
SMAD4	hTFtarget	NC_000012.12:c68161740-68159740	486	494	-	14.0714	8.06e-06	0.0309	ATGACTCAG
SP2	hTFtarget	NC_000012.12:c68161740-68159740	128	149	-	13.7564	8.06e-06	0.00129	TTTTTTTTTTTTTTTTTTGTGC
TCF12	hTFtarget	NC_000012.12:c68161740-68159740	486	494	+	14.3158	8.06e-06	0.0307	CTGAGTCAT
BRD7	hTFtarget	NC_000012.12:c68161740-68159740	1192	1213	-	13.1923	8.07e-06	0.0318	TTCCAGACGCAGTGGCTCACAC
ZNF143	hTFtarget	NC_000012.12:c68161740-68159740	135	155	+	13.5513	8.08e-06	0.00229	AAAAAAAAAAAAAAAAAAAAT
CTCF	hTFtarget	NC_000012.12:c68161740-68159740	991	1008	-	13.4242	8.1e-06	0.0321	CCAGAAGGTGGAGGTTGC
TBX4	database	NC_000012.12:c68161740-68159740	7	26	+	13.4694	8.11e-06	0.0236	GGGTGCGGTGGCTCACGCCT
CTCF	hTFtarget	NC_000012.12:c68161740-68159740	993	1008	+	13.3788	8.12e-06	0.0323	AACCTCCACCTTCTGG
KDM5B	hTFtarget	NC_000012.12:c68161740-68159740	908	923	+	14.3194	8.13e-06	0.00342	TTCTTTTTTTCTTTTT
NANOG	hTFtarget	NC_000012.12:c68161740-68159740	668	688	-	13.875	8.13e-06	0.015	TCCTCCTTTGTAATTTATTTA
EP300	hTFtarget	NC_000012.12:c68161740-68159740	1216	1224	-	14.1429	8.13e-06	0.0324	CCCAGGGGG
CTCF	hTFtarget	NC_000012.12:c68161740-68159740	995	1010	+	13.7424	8.15e-06	0.0324	CCTCCACCTTCTGGGT
EWSR1	hTFtarget	NC_000012.12:c68161740-68159740	893	911	-	3.75758	8.16e-06	0.0155	AGAAAAAAGGAAAGAAATA
FLI1	hTFtarget	NC_000012.12:c68161740-68159740	900	924	-	-10.0789	8.17e-06	0.0036	AAAAAAGAAAAAAAGAAAAAAGGAA
ZNF143	hTFtarget	NC_000012.12:c68161740-68159740	298	318	+	13.5385	8.17e-06	0.00229	CTCAAAAAAAAAAAAAAAAAA
IRF3	hTFtarget	NC_000012.12:c68161740-68159740	888	912	-	12.7692	8.18e-06	0.0014	AAGAAAAAAGGAAAGAAATACAGTG
CEBPB	hTFtarget	NC_000012.12:c68161740-68159740	252	263	-	14.2143	8.19e-06	0.0305	AGTGGCGCAATC
CTCF	hTFtarget	NC_000012.12:c68161740-68159740	994	1009	-	13.5	8.2e-06	0.0326	CCCAGAAGGTGGAGGT
EZH2	hTFtarget	NC_000012.12:c68161740-68159740	904	925	-	12.3372	8.23e-06	0.00298	AAAAAAAGAAAAAAAGAAAAAA
POLR2A	hTFtarget	NC_000012.12:c68161740-68159740	987	1002	+	13.6053	8.24e-06	0.0127	CACTGCAACCTCCACC
NR4A3	database	NC_000012.12:c68161740-68159740	1142	1151	-	14.1707	8.25e-06	0.0323	ACAAGGTCAG
NR4A3	database	NC_000012.12:c68161740-68159740	1142	1151	+	14.2653	8.25e-06	0.0323	CTGACCTTGT
BRD4	hTFtarget	NC_000012.12:c68161740-68159740	892	913	-	13.9615	8.26e-06	0.00248	AAAGAAAAAAGGAAAGAAATAC
MYC	hTFtarget	NC_000012.12:c68161740-68159740	198	213	-	12.8816	8.28e-06	0.0327	TTCTCCCGCCTCAGCC
CTCF	hTFtarget	NC_000012.12:c68161740-68159740	996	1008	-	13.697	8.28e-06	0.033	CCAGAAGGTGGAG
CTCF	hTFtarget	NC_000012.12:c68161740-68159740	995	1009	-	13.8182	8.29e-06	0.0329	CCCAGAAGGTGGAGG
SIX5	hTFtarget	NC_000012.12:c68161740-68159740	1844	1859	+	11.9394	8.34e-06	0.0331	TAACTACAACACCCAA
MYC	hTFtarget	NC_000012.12:c68161740-68159740	890	911	+	13.5439	8.35e-06	0.0249	CTGTATTTCTTTCCTTTTTTCT
IRF5	hTFtarget	NC_000012.12:c68161740-68159740	213	228	+	13.7792	8.37e-06	0.0111	ATGGCGTGAATCCGGG
RARA	hTFtarget	NC_000012.12:c68161740-68159740	982	997	-	13.9868	8.37e-06	0.0332	AGGTTGCAGTGAGCCG
ZNF92	hTFtarget	NC_000012.12:c68161740-68159740	908	932	+	12.9861	8.39e-06	0.00131	TTCTTTTTTTCTTTTTTTTTTTTTG
POU2F1	hTFtarget	NC_000012.12:c68161740-68159740	1022	1037	-	13.6579	8.42e-06	0.0167	GGAGGCTGAGGCAGGA
CTCF	hTFtarget	NC_000012.12:c68161740-68159740	993	1008	+	13.7273	8.42e-06	0.0333	AACCTCCACCTTCTGG
CDK9	hTFtarget	NC_000012.12:c68161740-68159740	916	931	-	13.9872	8.47e-06	0.00138	AAAAAAAAAAAAAGAA
CDK9	hTFtarget	NC_000012.12:c68161740-68159740	309	324	+	13.9872	8.47e-06	0.00138	AAAAAAAAAAAAAGAA
MED1	hTFtarget	NC_000012.12:c68161740-68159740	898	913	+	13.8961	8.48e-06	0.00248	CTTTCCTTTTTTCTTT
RAD21	hTFtarget	NC_000012.12:c68161740-68159740	993	1008	-	13.7121	8.49e-06	0.0335	CCAGAAGGTGGAGGTT
ZFP42	hTFtarget	NC_000012.12:c68161740-68159740	205	221	+	13.5789	8.49e-06	0.0337	GCGGGAGAATGGCGTGA
CDK8	hTFtarget	NC_000012.12:c68161740-68159740	311	326	-	13.8961	8.5e-06	0.00179	ATTTCTTTTTTTTTTT
SP2	hTFtarget	NC_000012.12:c68161740-68159740	902	923	+	13.6923	8.52e-06	0.0013	CCTTTTTTCTTTTTTTCTTTTT
CTCF	hTFtarget	NC_000012.12:c68161740-68159740	993	1008	+	13.3788	8.53e-06	0.0339	AACCTCCACCTTCTGG
FLI1	hTFtarget	NC_000012.12:c68161740-68159740	904	928	-	-10.2763	8.55e-06	0.0036	AAAAAAAAAAGAAAAAAAGAAAAAA
IRF3	hTFtarget	NC_000012.12:c68161740-68159740	302	323	+	13.3944	8.58e-06	0.0018	AAAAAAAAAAAAAAAAAAAAGA
BRD4	hTFtarget	NC_000012.12:c68161740-68159740	906	930	-	13.8701	8.58e-06	0.00276	AAAAAAAAAAAAGAAAAAAAGAAAA
SP2	hTFtarget	NC_000012.12:c68161740-68159740	893	908	+	13.8056	8.59e-06	0.000983	TATTTCTTTCCTTTTT
BDP1	database	NC_000012.12:c68161740-68159740	612	623	+	13.8018	8.6e-06	0.017	GGGTTTGAACCA
IRF5	hTFtarget	NC_000012.12:c68161740-68159740	313	328	+	9.20779	8.61e-06	0.000685	AAAAAAAAAGAAATGA
STAT1	hTFtarget	NC_000012.12:c68161740-68159740	724	741	-	14.0845	8.63e-06	0.0316	TTTAACTTTTTATTTCTT
CTCF	hTFtarget	NC_000012.12:c68161740-68159740	994	1009	-	13.4091	8.64e-06	0.0343	CCCAGAAGGTGGAGGT
POLR2A	hTFtarget	NC_000012.12:c68161740-68159740	1024	1039	+	13.4342	8.65e-06	0.0341	CTGCCTCAGCCTCCCT
RAD21	hTFtarget	NC_000012.12:c68161740-68159740	994	1007	-	13.8636	8.66e-06	0.0344	CAGAAGGTGGAGGT
MED1	hTFtarget	NC_000012.12:c68161740-68159740	898	913	-	13.9481	8.67e-06	0.00319	AAAGAAAAAAGGAAAG
RAD21	hTFtarget	NC_000012.12:c68161740-68159740	994	1009	+	13.1974	8.68e-06	0.0344	ACCTCCACCTTCTGGG
CTCF	hTFtarget	NC_000012.12:c68161740-68159740	994	1009	-	13.2576	8.68e-06	0.0345	CCCAGAAGGTGGAGGT
FLI1	hTFtarget	NC_000012.12:c68161740-68159740	1536	1557	+	9.9697	8.7e-06	0.00662	TAACCGCATTCTTTCCTTGCTT
RAD21	hTFtarget	NC_000012.12:c68161740-68159740	993	1008	-	13.6061	8.71e-06	0.0346	CCAGAAGGTGGAGGTT
SMARCA4	hTFtarget	NC_000012.12:c68161740-68159740	904	919	-	13.875	8.71e-06	0.00104	AGAAAAAAAGAAAAAA
ESR1	hTFtarget	NC_000012.12:c68161740-68159740	67	75	+	13.1143	8.74e-06	0.0349	GAGGTCAGG
RARA	hTFtarget	NC_000012.12:c68161740-68159740	1141	1149	-	12.8182	8.74e-06	0.0174	AAGGTCAGG
GTF2I	hTFtarget	NC_000012.12:c68161740-68159740	905	920	-	13.6923	8.76e-06	0.0192	AAGAAAAAAAGAAAAA
RB1	hTFtarget	NC_000012.12:c68161740-68159740	199	213	-	14.4394	8.78e-06	0.0349	TTCTCCCGCCTCAGC
CTCF	hTFtarget	NC_000012.12:c68161740-68159740	994	1009	+	12.8333	8.78e-06	0.0349	ACCTCCACCTTCTGGG
SPI1	hTFtarget	NC_000012.12:c68161740-68159740	997	1008	-	14.1316	8.81e-06	0.0351	CCAGAAGGTGGA
ETS1	hTFtarget	NC_000012.12:c68161740-68159740	1846	1861	+	12.9211	8.82e-06	0.0349	ACTACAACACCCAAAT
IRF1	hTFtarget	NC_000012.12:c68161740-68159740	907	922	-	14.0779	8.82e-06	0.00237	AAAAGAAAAAAAGAAA
SP2	hTFtarget	NC_000012.12:c68161740-68159740	130	145	-	13.7778	8.82e-06	0.000983	TTTTTTTTTTTTTTGT
CDK9	hTFtarget	NC_000012.12:c68161740-68159740	901	916	-	13.9359	8.83e-06	0.00138	AAAAAAGAAAAAAGGA
ETS1	hTFtarget	NC_000012.12:c68161740-68159740	1846	1861	+	13.2895	8.87e-06	0.0352	ACTACAACACCCAAAT
KDM5B	hTFtarget	NC_000012.12:c68161740-68159740	309	324	-	14.1806	8.9e-06	0.00342	TTCTTTTTTTTTTTTT
KDM5B	hTFtarget	NC_000012.12:c68161740-68159740	916	931	+	14.1806	8.9e-06	0.00342	TTCTTTTTTTTTTTTT
SMAD1	hTFtarget	NC_000012.12:c68161740-68159740	599	610	-	13.6197	8.9e-06	0.0338	CTTTGCATTTCT
CREB1	hTFtarget	NC_000012.12:c68161740-68159740	898	922	+	13.4189	8.9e-06	0.0169	CTTTCCTTTTTTCTTTTTTTCTTTT
ZNF217	hTFtarget	NC_000012.12:c68161740-68159740	459	480	-	13.8289	8.92e-06	0.0353	TTACCTGTAAAACTGGCTTGAT
FOSL2	hTFtarget	NC_000012.12:c68161740-68159740	486	494	+	14.9848	8.94e-06	0.0355	CTGAGTCAT
FOXM1	hTFtarget	NC_000012.12:c68161740-68159740	486	494	-	14.1688	8.94e-06	0.0322	ATGACTCAG
JUN	hTFtarget	NC_000012.12:c68161740-68159740	486	494	-	14.8429	8.94e-06	0.0355	ATGACTCAG
MEF2A	hTFtarget	NC_000012.12:c68161740-68159740	486	494	-	14.2143	8.94e-06	0.035	ATGACTCAG
OTX2	hTFtarget	NC_000012.12:c68161740-68159740	486	494	-	14.3553	8.94e-06	0.0355	ATGACTCAG
SPI1	hTFtarget	NC_000012.12:c68161740-68159740	486	494	+	14.4079	8.94e-06	0.0344	CTGAGTCAT
STAT1	hTFtarget	NC_000012.12:c68161740-68159740	486	494	+	14.8026	8.94e-06	0.0347	CTGAGTCAT
EHF	hTFtarget	NC_000012.12:c68161740-68159740	486	494	-	13.8961	8.94e-06	0.0332	ATGACTCAG
EP300	hTFtarget	NC_000012.12:c68161740-68159740	486	494	+	13.5	8.94e-06	0.0349	CTGAGTCAT
KDM5B	hTFtarget	NC_000012.12:c68161740-68159740	131	155	+	12.6154	8.95e-06	0.00153	CAAAAAAAAAAAAAAAAAAAAAAAT
SP2	hTFtarget	NC_000012.12:c68161740-68159740	717	738	-	13.6282	8.99e-06	0.00131	AACTTTTTATTTCTTTGTCTTT
ZNF143	hTFtarget	NC_000012.12:c68161740-68159740	295	319	-	13.2949	8.99e-06	0.00202	TTTTTTTTTTTTTTTTTTTGAGACG
RCOR1	hTFtarget	NC_000012.12:c68161740-68159740	1022	1037	+	13.507	9.01e-06	0.0176	TCCTGCCTCAGCCTCC
E2F4	hTFtarget	NC_000012.12:c68161740-68159740	204	212	+	15.4737	9.01e-06	0.0359	GGCGGGAGA
CTCF	hTFtarget	NC_000012.12:c68161740-68159740	994	1009	-	12.9394	9.02e-06	0.0358	CCCAGAAGGTGGAGGT
ESR1	hTFtarget	NC_000012.12:c68161740-68159740	1894	1918	-	13.2239	9.03e-06	0.0267	AGATGGTGACAGATAGGCAGGGATG
TFAP2D	database	NC_000012.12:c68161740-68159740	197	210	+	12.9512	9.04e-06	0.0332	AGGCTGAGGCGGGA
NANOG	hTFtarget	NC_000012.12:c68161740-68159740	712	727	-	13.6528	9.04e-06	0.029	TCTTTGTCTTTCAGAT
CTCF	hTFtarget	NC_000012.12:c68161740-68159740	994	1009	+	13.197	9.04e-06	0.0359	ACCTCCACCTTCTGGG
CTCF	hTFtarget	NC_000012.12:c68161740-68159740	993	1008	-	13.0909	9.05e-06	0.0359	CCAGAAGGTGGAGGTT
STAG1	hTFtarget	NC_000012.12:c68161740-68159740	993	1008	+	13.4394	9.06e-06	0.036	AACCTCCACCTTCTGG
YY1	hTFtarget	NC_000012.12:c68161740-68159740	1159	1180	+	11.5526	9.06e-06	0.0159	CCGCCTCAACCTCCCAAAGTGC
CTCF	hTFtarget	NC_000012.12:c68161740-68159740	997	1008	+	13.9545	9.06e-06	0.0359	TCCACCTTCTGG
CTCF	hTFtarget	NC_000012.12:c68161740-68159740	994	1009	+	13.2121	9.09e-06	0.0361	ACCTCCACCTTCTGGG
JUND	hTFtarget	NC_000012.12:c68161740-68159740	484	495	+	14.5303	9.1e-06	0.0361	GACTGAGTCATA
MED1	hTFtarget	NC_000012.12:c68161740-68159740	132	147	-	13.8831	9.1e-06	0.00172	TTTTTTTTTTTTTTTT
MED1	hTFtarget	NC_000012.12:c68161740-68159740	133	148	-	13.8831	9.1e-06	0.00172	TTTTTTTTTTTTTTTT
MED1	hTFtarget	NC_000012.12:c68161740-68159740	134	149	-	13.8831	9.1e-06	0.00172	TTTTTTTTTTTTTTTT
MED1	hTFtarget	NC_000012.12:c68161740-68159740	135	150	-	13.8831	9.1e-06	0.00172	TTTTTTTTTTTTTTTT
MED1	hTFtarget	NC_000012.12:c68161740-68159740	136	151	-	13.8831	9.1e-06	0.00172	TTTTTTTTTTTTTTTT
MED1	hTFtarget	NC_000012.12:c68161740-68159740	137	152	-	13.8831	9.1e-06	0.00172	TTTTTTTTTTTTTTTT
MED1	hTFtarget	NC_000012.12:c68161740-68159740	138	153	-	13.8831	9.1e-06	0.00172	TTTTTTTTTTTTTTTT
MED1	hTFtarget	NC_000012.12:c68161740-68159740	139	154	-	13.8831	9.1e-06	0.00172	TTTTTTTTTTTTTTTT
MED1	hTFtarget	NC_000012.12:c68161740-68159740	301	316	-	13.8831	9.1e-06	0.00172	TTTTTTTTTTTTTTTT
MED1	hTFtarget	NC_000012.12:c68161740-68159740	302	317	-	13.8831	9.1e-06	0.00172	TTTTTTTTTTTTTTTT
MED1	hTFtarget	NC_000012.12:c68161740-68159740	303	318	-	13.8831	9.1e-06	0.00172	TTTTTTTTTTTTTTTT
MED1	hTFtarget	NC_000012.12:c68161740-68159740	304	319	-	13.8831	9.1e-06	0.00172	TTTTTTTTTTTTTTTT
MED1	hTFtarget	NC_000012.12:c68161740-68159740	305	320	-	13.8831	9.1e-06	0.00172	TTTTTTTTTTTTTTTT
MED1	hTFtarget	NC_000012.12:c68161740-68159740	306	321	-	13.8831	9.1e-06	0.00172	TTTTTTTTTTTTTTTT
SMC1A	hTFtarget	NC_000012.12:c68161740-68159740	995	1009	+	13.5658	9.1e-06	0.0362	CCTCCACCTTCTGGG
SPI1	hTFtarget	NC_000012.12:c68161740-68159740	994	1011	+	12.9868	9.1e-06	0.0361	ACCTCCACCTTCTGGGTT
CTCF	hTFtarget	NC_000012.12:c68161740-68159740	994	1009	+	12.9394	9.1e-06	0.0361	ACCTCCACCTTCTGGG
BRD4	hTFtarget	NC_000012.12:c68161740-68159740	132	153	+	13.8205	9.12e-06	0.00248	AAAAAAAAAAAAAAAAAAAAAA
BRD4	hTFtarget	NC_000012.12:c68161740-68159740	133	154	+	13.8205	9.12e-06	0.00248	AAAAAAAAAAAAAAAAAAAAAA
CTCF	hTFtarget	NC_000012.12:c68161740-68159740	994	1009	-	13.4091	9.15e-06	0.0363	CCCAGAAGGTGGAGGT
FLI1	hTFtarget	NC_000012.12:c68161740-68159740	893	912	+	-25.8939	9.16e-06	0.00895	TATTTCTTTCCTTTTTTCTT
IRF3	hTFtarget	NC_000012.12:c68161740-68159740	892	916	-	12.5256	9.16e-06	0.00145	AAAAAAGAAAAAAGGAAAGAAATAC
SPI1	hTFtarget	NC_000012.12:c68161740-68159740	994	1009	-	12.9079	9.17e-06	0.0364	CCCAGAAGGTGGAGGT
SRF	hTFtarget	NC_000012.12:c68161740-68159740	994	1009	+	12.9394	9.18e-06	0.0365	ACCTCCACCTTCTGGG
CTCF	hTFtarget	NC_000012.12:c68161740-68159740	992	1008	+	13.1818	9.18e-06	0.0364	CAACCTCCACCTTCTGG
SMARCA4	hTFtarget	NC_000012.12:c68161740-68159740	307	322	+	13.8056	9.2e-06	0.00104	AAAAAAAAAAAAAAAG
IRF3	hTFtarget	NC_000012.12:c68161740-68159740	896	920	-	12.5128	9.22e-06	0.00145	AAGAAAAAAAGAAAAAAGGAAAGAA
CDK9	hTFtarget	NC_000012.12:c68161740-68159740	910	925	-	13.8846	9.22e-06	0.00138	AAAAAAAGAAAAAAAG
FOXP1	database	NC_000012.12:c68161740-68159740	136	155	-	-4.05952	9.23e-06	0.00276	ATTTTTTTTTTTTTTTTTTT
BTAF1	hTFtarget	NC_000012.12:c68161740-68159740	700	715	-	13.7692	9.23e-06	0.000695	AGATACAAAAAAAAAT
POLR2A	hTFtarget	NC_000012.12:c68161740-68159740	1022	1037	-	13.5526	9.24e-06	0.0122	GGAGGCTGAGGCAGGA
SPI1	hTFtarget	NC_000012.12:c68161740-68159740	993	1009	-	12.8421	9.24e-06	0.0366	CCCAGAAGGTGGAGGTT
CDK9	hTFtarget	NC_000012.12:c68161740-68159740	1846	1861	-	13.0395	9.24e-06	0.0366	ATTTGGGTGTTGTAGT
CTCF	hTFtarget	NC_000012.12:c68161740-68159740	994	1009	-	13.1667	9.24e-06	0.0367	CCCAGAAGGTGGAGGT
MAX	hTFtarget	NC_000012.12:c68161740-68159740	993	1008	-	13.7632	9.26e-06	0.0368	CCAGAAGGTGGAGGTT
MYC	hTFtarget	NC_000012.12:c68161740-68159740	907	921	+	13.7662	9.28e-06	0.0118	TTTCTTTTTTTCTTT
GATA4	database	NC_000012.12:c68161740-68159740	1048	1059	+	13.9358	9.29e-06	0.0287	AGATTACAGGCA
FLI1	hTFtarget	NC_000012.12:c68161740-68159740	901	920	+	-25.9697	9.32e-06	0.00895	TCCTTTTTTCTTTTTTTCTT
MED1	hTFtarget	NC_000012.12:c68161740-68159740	311	326	-	13.7792	9.32e-06	0.00248	ATTTCTTTTTTTTTTT
SMARCA4	hTFtarget	NC_000012.12:c68161740-68159740	483	494	+	14.4737	9.33e-06	0.037	AGACTGAGTCAT
SPI1	hTFtarget	NC_000012.12:c68161740-68159740	993	1008	-	13.1579	9.33e-06	0.0371	CCAGAAGGTGGAGGTT
SPI1	hTFtarget	NC_000012.12:c68161740-68159740	996	1009	+	13.5789	9.35e-06	0.0372	CTCCACCTTCTGGG
CEBPB	hTFtarget	NC_000012.12:c68161740-68159740	252	263	+	14.1061	9.36e-06	0.0349	GATTGCGCCACT
CEBPB	hTFtarget	NC_000012.12:c68161740-68159740	250	265	-	14.4394	9.36e-06	0.0356	GCAGTGGCGCAATCTC
SMARCA4	hTFtarget	NC_000012.12:c68161740-68159740	310	325	+	13.7778	9.4e-06	0.00104	AAAAAAAAAAAAGAAA
SMARCA4	hTFtarget	NC_000012.12:c68161740-68159740	915	930	-	13.7778	9.4e-06	0.00104	AAAAAAAAAAAAGAAA
CDK8	hTFtarget	NC_000012.12:c68161740-68159740	912	927	+	13.7662	9.4e-06	0.00188	TTTTTTCTTTTTTTTT
E2F1	hTFtarget	NC_000012.12:c68161740-68159740	204	212	+	15.1053	9.41e-06	0.0375	GGCGGGAGA
CDK9	hTFtarget	NC_000012.12:c68161740-68159740	900	915	-	13.859	9.41e-06	0.00138	AAAAAGAAAAAAGGAA
E2F1	hTFtarget	NC_000012.12:c68161740-68159740	204	212	+	15.1053	9.41e-06	0.0375	GGCGGGAGA
E2F4	hTFtarget	NC_000012.12:c68161740-68159740	204	212	+	15.0658	9.41e-06	0.0375	GGCGGGAGA
SRF	hTFtarget	NC_000012.12:c68161740-68159740	994	1009	+	13.0455	9.42e-06	0.0374	ACCTCCACCTTCTGGG
CTCF	hTFtarget	NC_000012.12:c68161740-68159740	990	1008	+	13.3485	9.42e-06	0.0374	TGCAACCTCCACCTTCTGG
CTCF	hTFtarget	NC_000012.12:c68161740-68159740	990	1008	+	13.3485	9.42e-06	0.0374	TGCAACCTCCACCTTCTGG
PAX5	hTFtarget	NC_000012.12:c68161740-68159740	154	169	+	13.7424	9.44e-06	0.0374	ATTAGCCGGGCGTGGC
ZNF384	hTFtarget	NC_000012.12:c68161740-68159740	313	337	+	6.48611	9.44e-06	0.000609	AAAAAAAAAGAAATGACTAGTCATC
EP300	hTFtarget	NC_000012.12:c68161740-68159740	198	213	-	13.0526	9.44e-06	0.0373	TTCTCCCGCCTCAGCC
TP53	hTFtarget	NC_000012.12:c68161740-68159740	909	930	-	1.05556	9.45e-06	0.00521	AAAAAAAAAAAAGAAAAAAAGA
RB1	hTFtarget	NC_000012.12:c68161740-68159740	200	213	-	14.3788	9.47e-06	0.0376	TTCTCCCGCCTCAG
SPI1	hTFtarget	NC_000012.12:c68161740-68159740	993	1008	-	13.5286	9.47e-06	0.0376	CCAGAAGGTGGAGGTT
MED1	hTFtarget	NC_000012.12:c68161740-68159740	307	322	+	13.8312	9.48e-06	0.00319	AAAAAAAAAAAAAAAG
CTCF	hTFtarget	NC_000012.12:c68161740-68159740	996	1009	-	13.697	9.48e-06	0.0375	CCCAGAAGGTGGAG
CTCF	hTFtarget	NC_000012.12:c68161740-68159740	996	1009	-	13.697	9.48e-06	0.0374	CCCAGAAGGTGGAG
KDM5B	hTFtarget	NC_000012.12:c68161740-68159740	897	921	-	12.4872	9.49e-06	0.00155	AAAGAAAAAAAGAAAAAAGGAAAGA
POLR2A	hTFtarget	NC_000012.12:c68161740-68159740	1023	1037	-	13.1447	9.49e-06	0.0136	GGAGGCTGAGGCAGG
POLR3A	hTFtarget	NC_000012.12:c68161740-68159740	1083	1098	-	13.6795	9.51e-06	0.00101	ACTAAAAATACAAAAA
ZNF143	hTFtarget	NC_000012.12:c68161740-68159740	1846	1861	+	11.5303	9.51e-06	0.0376	ACTACAACACCCAAAT
CTCF	hTFtarget	NC_000012.12:c68161740-68159740	997	1008	-	13.8939	9.53e-06	0.0379	CCAGAAGGTGGA
ERMAP	hTFtarget	NC_000012.12:c68161740-68159740	1512	1523	-	14.0714	9.54e-06	0.0374	GGTGAGGAAGTC
RAD21	hTFtarget	NC_000012.12:c68161740-68159740	993	1008	+	13.3182	9.54e-06	0.0379	AACCTCCACCTTCTGG
KAT5	hTFtarget	NC_000012.12:c68161740-68159740	1846	1861	-	12.2895	9.55e-06	0.0379	ATTTGGGTGTTGTAGT
TP53	hTFtarget	NC_000012.12:c68161740-68159740	907	928	-	1.01389	9.55e-06	0.00521	AAAAAAAAAAGAAAAAAAGAAA
ZNF384	hTFtarget	NC_000012.12:c68161740-68159740	898	919	+	9.41667	9.55e-06	0.000688	CTTTCCTTTTTTCTTTTTTTCT
ZNF92	hTFtarget	NC_000012.12:c68161740-68159740	896	920	+	12.75	9.58e-06	0.00143	TTCTTTCCTTTTTTCTTTTTTTCTT
CTCF	hTFtarget	NC_000012.12:c68161740-68159740	990	1008	-	12.5303	9.58e-06	0.038	CCAGAAGGTGGAGGTTGCA
GTF3C2	hTFtarget	NC_000012.12:c68161740-68159740	185	206	+	13.0263	9.62e-06	0.019	CAGCTACTCGGGAGGCTGAGGC
KLF5	hTFtarget	NC_000012.12:c68161740-68159740	158	173	+	14.0455	9.62e-06	0.0381	GCCGGGCGTGGCGAGT
POLR2A	hTFtarget	NC_000012.12:c68161740-68159740	1022	1037	+	13.3158	9.65e-06	0.0127	TCCTGCCTCAGCCTCC
USF1	hTFtarget	NC_000012.12:c68161740-68159740	1551	1575	-	11.5395	9.65e-06	0.0377	TTCTTGCAAATGACCAGAAAGCAAG
MAF	database	NC_000012.12:c68161740-68159740	1024	1034	-	12.8681	9.68e-06	0.0361	GGCTGAGGCAG
IRF3	hTFtarget	NC_000012.12:c68161740-68159740	719	740	+	13.1831	9.68e-06	0.00192	AGACAAAGAAATAAAAAGTTAA
SPI1	hTFtarget	NC_000012.12:c68161740-68159740	226	243	+	13.6842	9.72e-06	0.0384	GGGAGGCAGAGCTTGCAG
SPI1	hTFtarget	NC_000012.12:c68161740-68159740	1846	1861	-	13.7532	9.72e-06	0.0385	ATTTGGGTGTTGTAGT
LIN54	database	NC_000012.12:c68161740-68159740	1351	1360	+	7.49843	9.73e-06	0.0173	ATTTTAAAAT
LIN54	database	NC_000012.12:c68161740-68159740	1351	1360	-	7.49843	9.73e-06	0.0173	ATTTTAAAAT
SMAD2/SMAD3	hTFtarget	NC_000012.12:c68161740-68159740	595	609	-	13.5584	9.76e-06	0.0349	TTTGCATTTCTACCT
CTCF	hTFtarget	NC_000012.12:c68161740-68159740	994	1009	+	13.0303	9.76e-06	0.0388	ACCTCCACCTTCTGGG
CTCF	hTFtarget	NC_000012.12:c68161740-68159740	993	1008	+	12.6818	9.77e-06	0.0388	AACCTCCACCTTCTGG
CTCF	hTFtarget	NC_000012.12:c68161740-68159740	997	1008	-	13.8939	9.78e-06	0.0389	CCAGAAGGTGGA
RELA	hTFtarget	NC_000012.12:c68161740-68159740	896	911	-	12.8974	9.81e-06	0.0252	AGAAAAAAGGAAAGAA
STAG1	hTFtarget	NC_000012.12:c68161740-68159740	993	1008	+	13.3939	9.84e-06	0.0391	AACCTCCACCTTCTGG
YY1	hTFtarget	NC_000012.12:c68161740-68159740	1019	1034	+	12.8026	9.85e-06	0.0195	TTCTCCTGCCTCAGCC
PAX5	database	NC_000012.12:c68161740-68159740	1027	1034	-	13.6552	9.9e-06	0.0197	GGCTGAGG
PAX5	database	NC_000012.12:c68161740-68159740	198	205	+	13.6552	9.9e-06	0.0197	GGCTGAGG
JMJD6	hTFtarget	NC_000012.12:c68161740-68159740	994	1009	-	13.2121	9.9e-06	0.0393	CCCAGAAGGTGGAGGT
RBL2	hTFtarget	NC_000012.12:c68161740-68159740	204	212	+	14.2632	9.9e-06	0.0394	GGCGGGAGA
RBL2	hTFtarget	NC_000012.12:c68161740-68159740	204	212	+	14.4737	9.9e-06	0.0395	GGCGGGAGA
PAX5	database	NC_000012.12:c68161740-68159740	1027	1034	+	13.6122	9.9e-06	0.0197	CCTCAGCC
PAX5	database	NC_000012.12:c68161740-68159740	198	205	-	13.6122	9.9e-06	0.0197	CCTCAGCC
ERMAP	hTFtarget	NC_000012.12:c68161740-68159740	1512	1523	-	13.9571	9.91e-06	0.039	GGTGAGGAAGTC
GTF3C2	hTFtarget	NC_000012.12:c68161740-68159740	612	626	-	12.5714	9.91e-06	0.0197	CTTTGGTTCAAACCC
SOX2	database	NC_000012.12:c68161740-68159740	712	727	+	13.5821	9.93e-06	0.0366	ATCTGAAAGACAAAGA
MYC	hTFtarget	NC_000012.12:c68161740-68159740	994	1009	+	13.2895	9.93e-06	0.0395	ACCTCCACCTTCTGGG
CDK9	hTFtarget	NC_000012.12:c68161740-68159740	308	323	+	13.7949	9.93e-06	0.0014	AAAAAAAAAAAAAAGA
NFE2	hTFtarget	NC_000012.12:c68161740-68159740	886	907	+	13.6667	9.96e-06	0.0121	TACACTGTATTTCTTTCCTTTT
ETS1	hTFtarget	NC_000012.12:c68161740-68159740	1846	1861	-	12.5	9.97e-06	0.0395	ATTTGGGTGTTGTAGT
C17orf96	hTFtarget	NC_000012.12:c68161740-68159740	187	211	+	13.5823	9.97e-06	0.0161	GCTACTCGGGAGGCTGAGGCGGGAG
SOX2	database	NC_000012.12:c68161740-68159740	712	727	+	13.5644	9.97e-06	0.0374	ATCTGAAAGACAAAGA
ESR1	hTFtarget	NC_000012.12:c68161740-68159740	1824	1839	+	13.5694	1e-05	0.0383	AAGGAGTCTAAAGGAA
IRF5	hTFtarget	NC_000012.12:c68161740-68159740	900	915	-	8.72727	1e-05	0.000779	AAAAAGAAAAAAGGAA
MED1	hTFtarget	NC_000012.12:c68161740-68159740	914	929	+	13.7662	1e-05	0.00181	TTTTCTTTTTTTTTTT
CTCF	hTFtarget	NC_000012.12:c68161740-68159740	996	1009	+	13.5758	1e-05	0.0398	CTCCACCTTCTGGG
IRF4	database	NC_000012.12:c68161740-68159740	131	146	+	13.8644	1.01e-05	0.00174	CAAAAAAAAAAAAAAA
IRF4	database	NC_000012.12:c68161740-68159740	300	315	+	13.8644	1.01e-05	0.00174	CAAAAAAAAAAAAAAA
GTF2I	hTFtarget	NC_000012.12:c68161740-68159740	714	729	+	13.5128	1.01e-05	0.0192	CTGAAAGACAAAGAAA
IRF3	hTFtarget	NC_000012.12:c68161740-68159740	909	933	-	12.3205	1.01e-05	0.00152	TCAAAAAAAAAAAAAGAAAAAAAGA
RB1	hTFtarget	NC_000012.12:c68161740-68159740	201	212	-	14.1579	1.01e-05	0.0402	TCTCCCGCCTCA
SMC3	hTFtarget	NC_000012.12:c68161740-68159740	994	1009	-	12.6667	1.01e-05	0.04	CCCAGAAGGTGGAGGT
BTAF1	hTFtarget	NC_000012.12:c68161740-68159740	696	711	-	13.6538	1.01e-05	0.000742	ACAAAAAAAAATAGGA
CEBPB	hTFtarget	NC_000012.12:c68161740-68159740	252	263	+	14.1061	1.01e-05	0.0378	GATTGCGCCACT
CTCF	hTFtarget	NC_000012.12:c68161740-68159740	997	1008	-	13.7121	1.01e-05	0.0401	CCAGAAGGTGGA
CTCF	hTFtarget	NC_000012.12:c68161740-68159740	995	1010	-	13	1.01e-05	0.0401	ACCCAGAAGGTGGAGG
CTCF	hTFtarget	NC_000012.12:c68161740-68159740	995	1008	-	13.0758	1.01e-05	0.0403	CCAGAAGGTGGAGG
EBF1	hTFtarget	NC_000012.12:c68161740-68159740	1215	1226	-	14.0758	1.01e-05	0.0403	TTCCCAGGGGGA
HES1	database	NC_000012.12:c68161740-68159740	166	178	+	13.3146	1.02e-05	0.0405	TGGCGAGTGCCTG
SP4	database	NC_000012.12:c68161740-68159740	2	25	+	11.6768	1.02e-05	0.0404	AGGCCGGGTGCGGTGGCTCACGCC
FOS	hTFtarget	NC_000012.12:c68161740-68159740	483	496	-	14.4848	1.02e-05	0.0404	CTATGACTCAGTCT
KDM5B	hTFtarget	NC_000012.12:c68161740-68159740	994	1009	-	11.3429	1.02e-05	0.0404	CCCAGAAGGTGGAGGT
RUNX1	hTFtarget	NC_000012.12:c68161740-68159740	1642	1653	+	13.5606	1.02e-05	0.0407	CCAACCACAAGC
SPI1	hTFtarget	NC_000012.12:c68161740-68159740	313	328	+	12.4848	1.02e-05	0.0393	AAAAAAAAAGAAATGA
TP53	hTFtarget	NC_000012.12:c68161740-68159740	899	910	-	13.8077	1.02e-05	0.039	GAAAAAAGGAAA
ZNF143	hTFtarget	NC_000012.12:c68161740-68159740	905	929	+	13.1667	1.02e-05	0.00215	TTTTTCTTTTTTTCTTTTTTTTTTT
CEBPB	hTFtarget	NC_000012.12:c68161740-68159740	252	265	+	14.197	1.02e-05	0.0381	GATTGCGCCACTGC
IRF4	database	NC_000012.12:c68161740-68159740	131	146	+	13.8119	1.02e-05	0.00176	CAAAAAAAAAAAAAAA
IRF4	database	NC_000012.12:c68161740-68159740	300	315	+	13.8119	1.02e-05	0.00176	CAAAAAAAAAAAAAAA
FLI1	hTFtarget	NC_000012.12:c68161740-68159740	1546	1559	+	-3.25	1.03e-05	0.0403	CTTTCCTTGCTTTC
KDM5B	hTFtarget	NC_000012.12:c68161740-68159740	132	156	+	12.3077	1.03e-05	0.00161	AAAAAAAAAAAAAAAAAAAAAAATT
POLR2A	hTFtarget	NC_000012.12:c68161740-68159740	44	58	+	13	1.03e-05	0.0136	GGAGGCCAAGGCGGG
SRF	hTFtarget	NC_000012.12:c68161740-68159740	994	1009	-	12.5152	1.03e-05	0.0408	CCCAGAAGGTGGAGGT
CREBBP	hTFtarget	NC_000012.12:c68161740-68159740	1896	1911	-	4.62857	1.03e-05	0.0409	GACAGATAGGCAGGGA
CTCF	hTFtarget	NC_000012.12:c68161740-68159740	994	1009	+	12.6364	1.03e-05	0.0408	ACCTCCACCTTCTGGG
CTCF	hTFtarget	NC_000012.12:c68161740-68159740	995	1010	+	13.2121	1.03e-05	0.0409	CCTCCACCTTCTGGGT
EP300	hTFtarget	NC_000012.12:c68161740-68159740	895	908	-	10.9571	1.03e-05	0.0393	AAAAAGGAAAGAAA
HES2	database	NC_000012.12:c68161740-68159740	166	178	+	13.2959	1.03e-05	0.0411	TGGCGAGTGCCTG
SP4	database	NC_000012.12:c68161740-68159740	2	25	+	11.697	1.03e-05	0.0404	AGGCCGGGTGCGGTGGCTCACGCC
TLX1	database	NC_000012.12:c68161740-68159740	237	253	+	12.6235	1.04e-05	0.0414	CTTGCAGTGAGCCGAGA
EZH2	hTFtarget	NC_000012.12:c68161740-68159740	302	323	+	12.1395	1.04e-05	0.00342	AAAAAAAAAAAAAAAAAAAAGA
GTF2I	hTFtarget	NC_000012.12:c68161740-68159740	226	234	-	14.1143	1.04e-05	0.0137	CTGCCTCCC
IRF5	hTFtarget	NC_000012.12:c68161740-68159740	145	160	+	8.58442	1.04e-05	0.000793	AAAAAAAAAATTAGCC
SMAD4	hTFtarget	NC_000012.12:c68161740-68159740	711	726	+	13.4156	1.04e-05	0.0389	TATCTGAAAGACAAAG
SMC3	hTFtarget	NC_000012.12:c68161740-68159740	997	1008	-	13.5	1.04e-05	0.0415	CCAGAAGGTGGA
SP2	hTFtarget	NC_000012.12:c68161740-68159740	899	914	+	13.5972	1.04e-05	0.00112	TTTCCTTTTTTCTTTT
ZNF384	hTFtarget	NC_000012.12:c68161740-68159740	889	913	-	6.16667	1.04e-05	0.000659	AAAGAAAAAAGGAAAGAAATACAGT
CTCF	hTFtarget	NC_000012.12:c68161740-68159740	994	1009	+	13.2424	1.04e-05	0.0413	ACCTCCACCTTCTGGG
TLX1	database	NC_000012.12:c68161740-68159740	237	253	+	12.6019	1.04e-05	0.0411	CTTGCAGTGAGCCGAGA
FLI1	hTFtarget	NC_000012.12:c68161740-68159740	1546	1557	+	1.2	1.05e-05	0.0409	CTTTCCTTGCTT
FLI1	hTFtarget	NC_000012.12:c68161740-68159740	895	910	+	-11.2424	1.05e-05	0.0203	TTTCTTTCCTTTTTTC
POLR3A	hTFtarget	NC_000012.12:c68161740-68159740	1081	1096	-	13.5641	1.05e-05	0.00107	TAAAAATACAAAAAAA
RAD21	hTFtarget	NC_000012.12:c68161740-68159740	993	1008	+	13.1061	1.05e-05	0.0419	AACCTCCACCTTCTGG
RAD21	hTFtarget	NC_000012.12:c68161740-68159740	993	1008	+	13.1061	1.05e-05	0.0418	AACCTCCACCTTCTGG
SMAD3	hTFtarget	NC_000012.12:c68161740-68159740	712	727	+	13.2308	1.05e-05	0.0332	ATCTGAAAGACAAAGA
TAF1	hTFtarget	NC_000012.12:c68161740-68159740	196	207	-	13.2632	1.05e-05	0.0418	CGCCTCAGCCTC
POU4F2	database	NC_000012.12:c68161740-68159740	1386	1398	+	14.0435	1.06e-05	0.0404	TATTAATGAGGCT
IRF3	hTFtarget	NC_000012.12:c68161740-68159740	718	742	+	12.2051	1.06e-05	0.00154	AAGACAAAGAAATAAAAAGTTAAAA
SMARCB1	hTFtarget	NC_000012.12:c68161740-68159740	486	494	-	14.5395	1.06e-05	0.0419	ATGACTCAG
SMC1A	hTFtarget	NC_000012.12:c68161740-68159740	995	1010	+	12.5758	1.06e-05	0.0421	CCTCCACCTTCTGGGT
POU3F1	database	NC_000012.12:c68161740-68159740	596	609	-	13.3267	1.06e-05	0.036	TTTGCATTTCTACC
ZFY	database	NC_000012.12:c68161740-68159740	45	58	-	14.102	1.06e-05	0.0419	CCCGCCTTGGCCTC
POU3F1	database	NC_000012.12:c68161740-68159740	596	609	+	13.3069	1.07e-05	0.0363	GGTAGAAATGCAAA
MYC	hTFtarget	NC_000012.12:c68161740-68159740	993	1008	-	13.25	1.07e-05	0.0423	CCAGAAGGTGGAGGTT
POLR3A	hTFtarget	NC_000012.12:c68161740-68159740	124	139	+	13.5513	1.07e-05	0.00107	AATAGCACAAAAAAAA
SIX5	hTFtarget	NC_000012.12:c68161740-68159740	1846	1861	-	12.4868	1.07e-05	0.0426	ATTTGGGTGTTGTAGT
SRF	hTFtarget	NC_000012.12:c68161740-68159740	995	1007	-	13.6515	1.07e-05	0.0426	CAGAAGGTGGAGG
STAG1	hTFtarget	NC_000012.12:c68161740-68159740	993	1008	-	12.9242	1.07e-05	0.0423	CCAGAAGGTGGAGGTT
TAF1	hTFtarget	NC_000012.12:c68161740-68159740	194	209	-	13	1.07e-05	0.0423	CCCGCCTCAGCCTCCC
ZNF384	hTFtarget	NC_000012.12:c68161740-68159740	993	1008	+	13.5	1.07e-05	0.0424	AACCTCCACCTTCTGG
CEBPB	hTFtarget	NC_000012.12:c68161740-68159740	252	263	-	14.1818	1.07e-05	0.0406	AGTGGCGCAATC
CREBBP	hTFtarget	NC_000012.12:c68161740-68159740	1897	1911	-	12.9701	1.07e-05	0.042	GACAGATAGGCAGGG
POU4F2	database	NC_000012.12:c68161740-68159740	1386	1398	-	14.0396	1.07e-05	0.0398	AGCCTCATTAATA
TFAP2D	database	NC_000012.12:c68161740-68159740	1022	1035	+	11.5714	1.07e-05	0.0212	TCCTGCCTCAGCCT
CEBPE	database	NC_000012.12:c68161740-68159740	250	261	-	12.9516	1.08e-05	0.0421	TGGCGCAATCTC
IRF4	database	NC_000012.12:c68161740-68159740	308	323	+	13.7627	1.08e-05	0.00176	AAAAAAAAAAAAAAGA
NANOG	hTFtarget	NC_000012.12:c68161740-68159740	717	728	-	13.4306	1.08e-05	0.0416	TTCTTTGTCTTT
CEBPE	database	NC_000012.12:c68161740-68159740	250	261	+	12.8687	1.08e-05	0.0409	GAGATTGCGCCA
SPI1	hTFtarget	NC_000012.12:c68161740-68159740	484	495	+	14.1842	1.09e-05	0.0427	GACTGAGTCATA
TBX3	database	NC_000012.12:c68161740-68159740	1178	1201	+	9.64286	1.09e-05	0.043	TGCTGGGATTACAGGTGTGAGCCA
FLI1	hTFtarget	NC_000012.12:c68161740-68159740	897	908	+	13.8636	1.1e-05	0.0437	TCTTTCCTTTTT
IRF2	hTFtarget	NC_000012.12:c68161740-68159740	1745	1756	+	13.9481	1.1e-05	0.0397	GAAGTAAAAGTG
MAFB	hTFtarget	NC_000012.12:c68161740-68159740	198	209	-	13.2368	1.1e-05	0.0437	CCCGCCTCAGCC
SPI1	hTFtarget	NC_000012.12:c68161740-68159740	486	495	+	14.4474	1.1e-05	0.0434	CTGAGTCATA
TEAD4	hTFtarget	NC_000012.12:c68161740-68159740	391	402	+	13.9242	1.1e-05	0.0437	AAATTCCTAGCA
CTCF	hTFtarget	NC_000012.12:c68161740-68159740	993	1008	+	13.2727	1.1e-05	0.0436	AACCTCCACCTTCTGG
IRF4	database	NC_000012.12:c68161740-68159740	308	323	+	13.7129	1.1e-05	0.00177	AAAAAAAAAAAAAAGA
IRF4	database	NC_000012.12:c68161740-68159740	914	929	-	13.7288	1.11e-05	0.00176	AAAAAAAAAAAGAAAA
RELA	hTFtarget	NC_000012.12:c68161740-68159740	9	24	-	12.0658	1.11e-05	0.044	GCGTGAGCCACCGCAC
CTCF	hTFtarget	NC_000012.12:c68161740-68159740	993	1008	-	12.7273	1.11e-05	0.0442	CCAGAAGGTGGAGGTT
EP300	hTFtarget	NC_000012.12:c68161740-68159740	669	684	+	13.3077	1.11e-05	0.0198	AAATAAATTACAAAGG
MED1	hTFtarget	NC_000012.12:c68161740-68159740	307	322	-	13.5455	1.12e-05	0.00248	CTTTTTTTTTTTTTTT
POLR2A	hTFtarget	NC_000012.12:c68161740-68159740	193	208	-	12.3421	1.12e-05	0.0223	CCGCCTCAGCCTCCCG
CTCF	hTFtarget	NC_000012.12:c68161740-68159740	995	1010	-	12.697	1.12e-05	0.0446	ACCCAGAAGGTGGAGG
CTCF	hTFtarget	NC_000012.12:c68161740-68159740	994	1009	+	12.6818	1.12e-05	0.0445	ACCTCCACCTTCTGGG
IRF4	database	NC_000012.12:c68161740-68159740	914	929	-	13.6832	1.12e-05	0.00177	AAAAAAAAAAAGAAAA
MRE11A	hTFtarget	NC_000012.12:c68161740-68159740	989	1008	+	12.8816	1.13e-05	0.0449	CTGCAACCTCCACCTTCTGG
RAD21	hTFtarget	NC_000012.12:c68161740-68159740	993	1008	+	13.1364	1.13e-05	0.0449	AACCTCCACCTTCTGG
CTCF	hTFtarget	NC_000012.12:c68161740-68159740	993	1008	-	13.0606	1.13e-05	0.045	CCAGAAGGTGGAGGTT
AP1	database	NC_000012.12:c68161740-68159740	486	494	-	13.8468	1.14e-05	0.0427	ATGACTCAG
MYC	hTFtarget	NC_000012.12:c68161740-68159740	486	494	-	14.0263	1.14e-05	0.0445	ATGACTCAG
MYC	hTFtarget	NC_000012.12:c68161740-68159740	486	494	-	14.0263	1.14e-05	0.0445	ATGACTCAG
NANOG	hTFtarget	NC_000012.12:c68161740-68159740	713	728	-	13.4306	1.14e-05	0.0284	TTCTTTGTCTTTCAGA
RELA	hTFtarget	NC_000012.12:c68161740-68159740	486	494	-	14.5	1.14e-05	0.0444	ATGACTCAG
SPI1	hTFtarget	NC_000012.12:c68161740-68159740	486	494	+	14.5395	1.14e-05	0.0445	CTGAGTCAT
SPI1	hTFtarget	NC_000012.12:c68161740-68159740	486	494	+	14.1316	1.14e-05	0.044	CTGAGTCAT
SPI1	hTFtarget	NC_000012.12:c68161740-68159740	486	494	-	14.1447	1.14e-05	0.0423	ATGACTCAG
CEBPA	hTFtarget	NC_000012.12:c68161740-68159740	252	262	+	13.9848	1.14e-05	0.0421	GATTGCGCCAC
GTF3C2	hTFtarget	NC_000012.12:c68161740-68159740	132	156	+	9.5974	1.15e-05	0.00252	AAAAAAAAAAAAAAAAAAAAAAATT
KDM5B	hTFtarget	NC_000012.12:c68161740-68159740	897	912	+	13.7639	1.15e-05	0.00342	TCTTTCCTTTTTTCTT
NANOG	hTFtarget	NC_000012.12:c68161740-68159740	712	727	-	13.3889	1.15e-05	0.0438	TCTTTGTCTTTCAGAT
TOP1	hTFtarget	NC_000012.12:c68161740-68159740	997	1008	-	13.7237	1.15e-05	0.0459	CCAGAAGGTGGA
ZNF76	hTFtarget	NC_000012.12:c68161740-68159740	1846	1861	-	12.3289	1.15e-05	0.0455	ATTTGGGTGTTGTAGT
CEBPB	hTFtarget	NC_000012.12:c68161740-68159740	252	263	+	13.8333	1.15e-05	0.0429	GATTGCGCCACT
CTCF	hTFtarget	NC_000012.12:c68161740-68159740	994	1009	-	12.4697	1.15e-05	0.0459	CCCAGAAGGTGGAGGT
NFE2L2	database	NC_000012.12:c68161740-68159740	278	288	+	13.9388	1.16e-05	0.0461	GTGACAGAGCA
ETS1	hTFtarget	NC_000012.12:c68161740-68159740	1846	1861	-	12.75	1.16e-05	0.0459	ATTTGGGTGTTGTAGT
FLI1	hTFtarget	NC_000012.12:c68161740-68159740	906	927	+	-3.3	1.16e-05	0.00835	TTTTCTTTTTTTCTTTTTTTTT
LHX2	hTFtarget	NC_000012.12:c68161740-68159740	485	495	-	13.8553	1.16e-05	0.0438	TATGACTCAGT
TBL1XR1	hTFtarget	NC_000012.12:c68161740-68159740	906	921	-	13.4648	1.16e-05	0.0407	AAAGAAAAAAAGAAAA
ZNF384	hTFtarget	NC_000012.12:c68161740-68159740	297	318	-	8.84722	1.16e-05	0.000821	TTTTTTTTTTTTTTTTTTGAGA
IRF5	database	NC_000012.12:c68161740-68159740	895	914	-	3.7551	1.16e-05	0.0434	AAAAGAAAAAAGGAAAGAAA
KLF9	hTFtarget	NC_000012.12:c68161740-68159740	159	174	+	12.7286	1.17e-05	0.0464	CCGGGCGTGGCGAGTG
CBFB	hTFtarget	NC_000012.12:c68161740-68159740	1642	1653	+	13.3947	1.17e-05	0.0466	CCAACCACAAGC
TFAP2C	hTFtarget	NC_000012.12:c68161740-68159740	994	1009	+	13.3421	1.17e-05	0.0463	ACCTCCACCTTCTGGG
CTCF	hTFtarget	NC_000012.12:c68161740-68159740	994	1009	+	12.6364	1.17e-05	0.0463	ACCTCCACCTTCTGGG
CTCF	hTFtarget	NC_000012.12:c68161740-68159740	991	1008	+	12.6364	1.17e-05	0.0464	GCAACCTCCACCTTCTGG
CTCF	hTFtarget	NC_000012.12:c68161740-68159740	994	1009	+	13.3816	1.17e-05	0.0465	ACCTCCACCTTCTGGG
ARID5B	database	NC_000012.12:c68161740-68159740	1845	1858	+	13.5941	1.18e-05	0.0464	AACTACAACACCCA
ETS1	hTFtarget	NC_000012.12:c68161740-68159740	1163	1184	-	11.3553	1.18e-05	0.0467	CCCAGCACTTTGGGAGGTTGAG
IRF5	hTFtarget	NC_000012.12:c68161740-68159740	725	740	+	8.18182	1.18e-05	0.000883	AGAAATAAAAAGTTAA
STAG1	hTFtarget	NC_000012.12:c68161740-68159740	993	1008	+	12.7879	1.18e-05	0.0471	AACCTCCACCTTCTGG
TP53	hTFtarget	NC_000012.12:c68161740-68159740	901	922	-	0.152778	1.18e-05	0.00521	AAAAGAAAAAAAGAAAAAAGGA
CTCF	hTFtarget	NC_000012.12:c68161740-68159740	997	1008	+	13.6711	1.18e-05	0.0469	TCCACCTTCTGG
NFE2	database	NC_000012.12:c68161740-68159740	1023	1038	+	13.4862	1.19e-05	0.0473	CCTGCCTCAGCCTCCC
GTF3C2	hTFtarget	NC_000012.12:c68161740-68159740	411	422	+	12.8158	1.19e-05	0.0463	GGATTACCTGAT
SMAD1	hTFtarget	NC_000012.12:c68161740-68159740	846	857	+	13.9474	1.19e-05	0.0475	ACGACTAGACCA
TAF1	hTFtarget	NC_000012.12:c68161740-68159740	1021	1036	-	12.4737	1.19e-05	0.0236	GAGGCTGAGGCAGGAG
TP53	hTFtarget	NC_000012.12:c68161740-68159740	129	150	+	0.111111	1.19e-05	0.00521	CACAAAAAAAAAAAAAAAAAAA
CEBPB	hTFtarget	NC_000012.12:c68161740-68159740	252	263	+	14.0455	1.19e-05	0.0448	GATTGCGCCACT
CTCF	hTFtarget	NC_000012.12:c68161740-68159740	994	1009	-	12.5303	1.19e-05	0.0472	CCCAGAAGGTGGAGGT
CTCF	hTFtarget	NC_000012.12:c68161740-68159740	997	1008	-	13.5606	1.19e-05	0.0472	CCAGAAGGTGGA
TBX4	database	NC_000012.12:c68161740-68159740	7	26	-	12.7653	1.19e-05	0.0236	AGGCGTGAGCCACCGCACCC
IRF5	database	NC_000012.12:c68161740-68159740	895	914	-	7.57724	1.2e-05	0.0446	AAAAGAAAAAAGGAAAGAAA
KDM5B	hTFtarget	NC_000012.12:c68161740-68159740	913	928	+	13.6944	1.2e-05	0.00342	TTTTTCTTTTTTTTTT
RELA	hTFtarget	NC_000012.12:c68161740-68159740	1206	1221	-	13.5758	1.2e-05	0.0477	AGGGGGAGTTCCAGAC
STAG1	hTFtarget	NC_000012.12:c68161740-68159740	995	1007	-	13.5303	1.2e-05	0.0477	CAGAAGGTGGAGG
SUZ12	hTFtarget	NC_000012.12:c68161740-68159740	1021	1036	+	12.75	1.2e-05	0.0159	CTCCTGCCTCAGCCTC
CTCF	hTFtarget	NC_000012.12:c68161740-68159740	992	1010	-	12.7121	1.2e-05	0.0477	ACCCAGAAGGTGGAGGTTG
IKZF1	database	NC_000012.12:c68161740-68159740	41	48	+	12.1341	1.21e-05	0.024	TTGGGAGG
IKZF1	database	NC_000012.12:c68161740-68159740	1168	1175	-	12.1341	1.21e-05	0.024	TTGGGAGG
MZF1	database	NC_000012.12:c68161740-68159740	1704	1711	+	12.5918	1.21e-05	0.0478	AGTGGGGA
POLR3A	database	NC_000012.12:c68161740-68159740	612	627	-	12.9818	1.21e-05	0.014	TCTTTGGTTCAAACCC
ESR1	hTFtarget	NC_000012.12:c68161740-68159740	608	623	+	13.7237	1.21e-05	0.0468	AAGTGGGTTTGAACCA
KDM5B	hTFtarget	NC_000012.12:c68161740-68159740	893	917	-	11.9487	1.21e-05	0.00182	AAAAAAAGAAAAAAGGAAAGAAATA
SPI1	hTFtarget	NC_000012.12:c68161740-68159740	995	1010	+	12.7368	1.21e-05	0.0479	CCTCCACCTTCTGGGT
SPI1	hTFtarget	NC_000012.12:c68161740-68159740	1512	1523	-	13.5571	1.21e-05	0.048	GGTGAGGAAGTC
YY1	hTFtarget	NC_000012.12:c68161740-68159740	36	57	-	10.9342	1.21e-05	0.0159	CCGCCTTGGCCTCCCAAAGTGC
ZEB1	hTFtarget	NC_000012.12:c68161740-68159740	1784	1792	-	13.4143	1.21e-05	0.0483	GCCCACCTG
CTCF	hTFtarget	NC_000012.12:c68161740-68159740	997	1008	-	13.4848	1.21e-05	0.048	CCAGAAGGTGGA
CTCF	hTFtarget	NC_000012.12:c68161740-68159740	994	1009	+	12.9697	1.21e-05	0.0479	ACCTCCACCTTCTGGG
CTCF	hTFtarget	NC_000012.12:c68161740-68159740	993	1009	-	12.4091	1.21e-05	0.048	CCCAGAAGGTGGAGGTT
EP300	hTFtarget	NC_000012.12:c68161740-68159740	915	930	+	13.4211	1.21e-05	0.0138	TTTCTTTTTTTTTTTT
EP300	hTFtarget	NC_000012.12:c68161740-68159740	310	325	-	13.4211	1.21e-05	0.0138	TTTCTTTTTTTTTTTT
IKZF4	database	NC_000012.12:c68161740-68159740	41	48	+	12.102	1.21e-05	0.024	TTGGGAGG
IKZF4	database	NC_000012.12:c68161740-68159740	1168	1175	-	12.102	1.21e-05	0.024	TTGGGAGG
IRF3	hTFtarget	NC_000012.12:c68161740-68159740	896	917	-	12.7746	1.22e-05	0.00208	AAAAAAAGAAAAAAGGAAAGAA
IRF3	hTFtarget	NC_000012.12:c68161740-68159740	134	155	+	12.7746	1.22e-05	0.00208	AAAAAAAAAAAAAAAAAAAAAT
CBX3	hTFtarget	NC_000012.12:c68161740-68159740	956	971	+	12.5526	1.22e-05	0.0253	TAGGCTGGAGTGTAGT
ERG	hTFtarget	NC_000012.12:c68161740-68159740	301	325	-	-15.1316	1.22e-05	0.00351	TTTCTTTTTTTTTTTTTTTTTTTTT
ZNF219	database	NC_000012.12:c68161740-68159740	1154	1165	-	13.4898	1.22e-05	0.0484	GAGGCGGGTGGA
ZNF219	database	NC_000012.12:c68161740-68159740	1154	1165	-	13.4944	1.23e-05	0.0485	GAGGCGGGTGGA
FLI1	hTFtarget	NC_000012.12:c68161740-68159740	894	911	-	-5.0303	1.23e-05	0.0156	AGAAAAAAGGAAAGAAAT
IRF3	hTFtarget	NC_000012.12:c68161740-68159740	903	924	-	12.7606	1.23e-05	0.00208	AAAAAAGAAAAAAAGAAAAAAG
NANOG	hTFtarget	NC_000012.12:c68161740-68159740	719	729	-	12.8472	1.23e-05	0.0472	TTTCTTTGTCT
POLR3A	hTFtarget	NC_000012.12:c68161740-68159740	257	272	-	13.4	1.23e-05	0.0245	CTGGAGTGCAGTGGCG
RBL2	hTFtarget	NC_000012.12:c68161740-68159740	202	213	+	13.9545	1.23e-05	0.0491	GAGGCGGGAGAA
TP53	hTFtarget	NC_000012.12:c68161740-68159740	714	735	+	-0.0277778	1.23e-05	0.00521	CTGAAAGACAAAGAAATAAAAA
CDK8	hTFtarget	NC_000012.12:c68161740-68159740	307	322	-	13.4286	1.23e-05	0.00233	CTTTTTTTTTTTTTTT
ZNF384	hTFtarget	NC_000012.12:c68161740-68159740	886	910	-	5.59722	1.23e-05	0.000767	GAAAAAAGGAAAGAAATACAGTGTA
CTCF	hTFtarget	NC_000012.12:c68161740-68159740	995	1009	+	12.8571	1.23e-05	0.049	CCTCCACCTTCTGGG
MED1	hTFtarget	NC_000012.12:c68161740-68159740	131	146	-	13.5065	1.24e-05	0.00204	TTTTTTTTTTTTTTTG
MED1	hTFtarget	NC_000012.12:c68161740-68159740	300	315	-	13.5065	1.24e-05	0.00204	TTTTTTTTTTTTTTTG
RUNX1	hTFtarget	NC_000012.12:c68161740-68159740	1643	1654	+	13.7857	1.24e-05	0.0495	CAACCACAAGCA
CTCF	hTFtarget	NC_000012.12:c68161740-68159740	997	1008	-	13.5526	1.24e-05	0.0493	CCAGAAGGTGGA
AP1	database	NC_000012.12:c68161740-68159740	482	493	-	12.1556	1.25e-05	0.0488	TGACTCAGTCTC
ETV5	hTFtarget	NC_000012.12:c68161740-68159740	486	500	-	13.9474	1.25e-05	0.0489	TCTTCTATGACTCAG
GTF3C2	hTFtarget	NC_000012.12:c68161740-68159740	300	324	+	9.4026	1.25e-05	0.00252	CAAAAAAAAAAAAAAAAAAAAAGAA
GTF3C2	hTFtarget	NC_000012.12:c68161740-68159740	127	151	+	9.38961	1.25e-05	0.00252	AGCACAAAAAAAAAAAAAAAAAAAA
IRF3	hTFtarget	NC_000012.12:c68161740-68159740	304	328	+	11.8333	1.25e-05	0.00175	AAAAAAAAAAAAAAAAAAGAAATGA
JUN	hTFtarget	NC_000012.12:c68161740-68159740	482	497	+	14.0303	1.25e-05	0.0482	GAGACTGAGTCATAGA
RUNX1	hTFtarget	NC_000012.12:c68161740-68159740	1642	1653	+	13.9242	1.25e-05	0.0497	CCAACCACAAGC
FOSL2	database	NC_000012.12:c68161740-68159740	484	494	+	14.3276	1.26e-05	0.0491	GACTGAGTCAT
HOXD13	database	NC_000012.12:c68161740-68159740	363	373	+	12.41	1.26e-05	0.0481	TTTATTAGTGA
FLI1	hTFtarget	NC_000012.12:c68161740-68159740	889	913	+	-19.1714	1.26e-05	0.006	ACTGTATTTCTTTCCTTTTTTCTTT
GTF3C2	hTFtarget	NC_000012.12:c68161740-68159740	917	938	-	13.1538	1.26e-05	0.00751	CCGTCTCAAAAAAAAAAAAAGA
ARRB1	hTFtarget	NC_000012.12:c68161740-68159740	1823	1840	+	11.5904	1.26e-05	0.0477	CAAGGAGTCTAAAGGAAA
IRF3	hTFtarget	NC_000012.12:c68161740-68159740	137	158	+	12.7042	1.26e-05	0.00208	AAAAAAAAAAAAAAAAAATTAG
POU5F1	hTFtarget	NC_000012.12:c68161740-68159740	906	921	-	13.2821	1.26e-05	0.026	AAAGAAAAAAAGAAAA
FOSL2	database	NC_000012.12:c68161740-68159740	484	494	-	14.2959	1.26e-05	0.0502	ATGACTCAGTC
HOXD13	database	NC_000012.12:c68161740-68159740	363	373	-	12.42	1.26e-05	0.0478	TCACTAATAAA
FLI1	hTFtarget	NC_000012.12:c68161740-68159740	894	915	+	-3.65714	1.27e-05	0.00835	ATTTCTTTCCTTTTTTCTTTTT
POU5F1	hTFtarget	NC_000012.12:c68161740-68159740	712	727	+	13.3247	1.27e-05	0.0439	ATCTGAAAGACAAAGA
SPI1	hTFtarget	NC_000012.12:c68161740-68159740	994	1011	+	12.0921	1.27e-05	0.0505	ACCTCCACCTTCTGGGTT
TAF1	hTFtarget	NC_000012.12:c68161740-68159740	980	1001	+	12.3947	1.27e-05	0.0503	CTCGGCTCACTGCAACCTCCAC
ZBTB17	hTFtarget	NC_000012.12:c68161740-68159740	192	207	-	11.8816	1.27e-05	0.0493	CGCCTCAGCCTCCCGA
CTCF	hTFtarget	NC_000012.12:c68161740-68159740	994	1009	+	12.6667	1.27e-05	0.0505	ACCTCCACCTTCTGGG
YY1	hTFtarget	NC_000012.12:c68161740-68159740	198	213	-	12.3289	1.28e-05	0.0506	TTCTCCCGCCTCAGCC
EWSR1	hTFtarget	NC_000012.12:c68161740-68159740	1541	1559	-	2.21212	1.29e-05	0.0164	GAAAGCAAGGAAAGAATGC
MYC	hTFtarget	NC_000012.12:c68161740-68159740	898	919	+	12.9912	1.29e-05	0.0249	CTTTCCTTTTTTCTTTTTTTCT
SPI1	hTFtarget	NC_000012.12:c68161740-68159740	1512	1523	-	13.5	1.29e-05	0.0502	GGTGAGGAAGTC
STAT3	hTFtarget	NC_000012.12:c68161740-68159740	200	221	+	12.2237	1.29e-05	0.051	CTGAGGCGGGAGAATGGCGTGA
CBX3	hTFtarget	NC_000012.12:c68161740-68159740	261	276	-	12.4342	1.29e-05	0.0253	CAGGCTGGAGTGCAGT
USF1	hTFtarget	NC_000012.12:c68161740-68159740	614	635	+	13.0395	1.29e-05	0.0504	GTTTGAACCAAAGAGTGGAGGG
CEBPB	database	NC_000012.12:c68161740-68159740	253	262	-	13.0484	1.3e-05	0.0501	GTGGCGCAAT
JUN	database	NC_000012.12:c68161740-68159740	481	494	+	14.0577	1.3e-05	0.0502	GGAGACTGAGTCAT
JUN	hTFtarget	NC_000012.12:c68161740-68159740	486	494	-	14.2535	1.3e-05	0.048	ATGACTCAG
JUND	hTFtarget	NC_000012.12:c68161740-68159740	486	494	-	13.9014	1.3e-05	0.0468	ATGACTCAG
ATF3	hTFtarget	NC_000012.12:c68161740-68159740	486	494	+	14.0563	1.3e-05	0.0506	CTGAGTCAT
SMARCA4	hTFtarget	NC_000012.12:c68161740-68159740	486	494	+	14.1842	1.3e-05	0.047	CTGAGTCAT
SPI1	hTFtarget	NC_000012.12:c68161740-68159740	994	1009	-	13	1.3e-05	0.0515	CCCAGAAGGTGGAGGT
SPI1	hTFtarget	NC_000012.12:c68161740-68159740	486	494	-	14.4085	1.3e-05	0.0489	ATGACTCAG
SPI1	hTFtarget	NC_000012.12:c68161740-68159740	486	494	-	14.169	1.3e-05	0.0493	ATGACTCAG
STAT3	hTFtarget	NC_000012.12:c68161740-68159740	486	494	-	13.75	1.3e-05	0.0501	ATGACTCAG
TBL1XR1	hTFtarget	NC_000012.12:c68161740-68159740	486	494	-	14.2763	1.3e-05	0.0466	ATGACTCAG
CREBBP	hTFtarget	NC_000012.12:c68161740-68159740	486	494	+	14.2286	1.3e-05	0.0514	CTGAGTCAT
EBF1	hTFtarget	NC_000012.12:c68161740-68159740	1213	1227	+	13.5	1.3e-05	0.0431	ACTCCCCCTGGGAAT
CEBPB	database	NC_000012.12:c68161740-68159740	253	262	-	13.0102	1.3e-05	0.0501	GTGGCGCAAT
GATA1	hTFtarget	NC_000012.12:c68161740-68159740	1158	1173	-	12.4409	1.31e-05	0.0517	GGGAGGTTGAGGCGGG
IRF1	hTFtarget	NC_000012.12:c68161740-68159740	896	913	-	10.5909	1.31e-05	0.0368	AAAGAAAAAAGGAAAGAA
NFE2	hTFtarget	NC_000012.12:c68161740-68159740	308	329	-	13.3333	1.31e-05	0.0121	GTCATTTCTTTTTTTTTTTTTT
ZNF280D	hTFtarget	NC_000012.12:c68161740-68159740	680	695	+	13.4156	1.31e-05	0.0423	AAAGGAGGAGAAAGAA
CTCF	hTFtarget	NC_000012.12:c68161740-68159740	995	1010	-	12.8469	1.31e-05	0.0522	ACCCAGAAGGTGGAGG
CTCF	hTFtarget	NC_000012.12:c68161740-68159740	994	1009	-	12.1515	1.31e-05	0.0521	CCCAGAAGGTGGAGGT
CTCF	hTFtarget	NC_000012.12:c68161740-68159740	993	1008	+	12.5303	1.31e-05	0.0521	AACCTCCACCTTCTGG
ESR1	hTFtarget	NC_000012.12:c68161740-68159740	982	997	+	13.1286	1.32e-05	0.0522	CGGCTCACTGCAACCT
REST	hTFtarget	NC_000012.12:c68161740-68159740	1448	1459	+	13.5526	1.32e-05	0.0525	GCAGTGCTGATC
ZNF143	hTFtarget	NC_000012.12:c68161740-68159740	136	156	+	13	1.32e-05	0.00324	AAAAAAAAAAAAAAAAAAATT
NFATC4	database	NC_000012.12:c68161740-68159740	386	395	+	12.7143	1.33e-05	0.051	AGGAAAAATT
CTCF	database	NC_000012.12:c68161740-68159740	995	1014	-	13.0758	1.33e-05	0.0526	TTGAACCCAGAAGGTGGAGG
POLR2A	hTFtarget	NC_000012.12:c68161740-68159740	1022	1037	+	12.8571	1.33e-05	0.0263	TCCTGCCTCAGCCTCC
SPI1	hTFtarget	NC_000012.12:c68161740-68159740	994	1009	-	12.7763	1.33e-05	0.053	CCCAGAAGGTGGAGGT
ZNF143	hTFtarget	NC_000012.12:c68161740-68159740	904	924	-	12.9872	1.33e-05	0.00324	AAAAAAGAAAAAAAGAAAAAA
CTCF	hTFtarget	NC_000012.12:c68161740-68159740	994	1009	-	12.303	1.33e-05	0.053	CCCAGAAGGTGGAGGT
CTCF	hTFtarget	NC_000012.12:c68161740-68159740	994	1009	-	12.4697	1.33e-05	0.0527	CCCAGAAGGTGGAGGT
NFATC4	database	NC_000012.12:c68161740-68159740	386	395	-	12.7245	1.33e-05	0.0509	AATTTTTCCT
ESR1	hTFtarget	NC_000012.12:c68161740-68159740	486	494	+	14.0921	1.34e-05	0.0531	CTGAGTCAT
MED1	hTFtarget	NC_000012.12:c68161740-68159740	132	147	-	13.3117	1.34e-05	0.00248	TTTTTTTTTTTTTTTT
MED1	hTFtarget	NC_000012.12:c68161740-68159740	133	148	-	13.3117	1.34e-05	0.00248	TTTTTTTTTTTTTTTT
MED1	hTFtarget	NC_000012.12:c68161740-68159740	134	149	-	13.3117	1.34e-05	0.00248	TTTTTTTTTTTTTTTT
MED1	hTFtarget	NC_000012.12:c68161740-68159740	135	150	-	13.3117	1.34e-05	0.00248	TTTTTTTTTTTTTTTT
MED1	hTFtarget	NC_000012.12:c68161740-68159740	136	151	-	13.3117	1.34e-05	0.00248	TTTTTTTTTTTTTTTT
MED1	hTFtarget	NC_000012.12:c68161740-68159740	137	152	-	13.3117	1.34e-05	0.00248	TTTTTTTTTTTTTTTT
MED1	hTFtarget	NC_000012.12:c68161740-68159740	138	153	-	13.3117	1.34e-05	0.00248	TTTTTTTTTTTTTTTT
MED1	hTFtarget	NC_000012.12:c68161740-68159740	139	154	-	13.3117	1.34e-05	0.00248	TTTTTTTTTTTTTTTT
MED1	hTFtarget	NC_000012.12:c68161740-68159740	301	316	-	13.3117	1.34e-05	0.00248	TTTTTTTTTTTTTTTT
MED1	hTFtarget	NC_000012.12:c68161740-68159740	302	317	-	13.3117	1.34e-05	0.00248	TTTTTTTTTTTTTTTT
MED1	hTFtarget	NC_000012.12:c68161740-68159740	303	318	-	13.3117	1.34e-05	0.00248	TTTTTTTTTTTTTTTT
MED1	hTFtarget	NC_000012.12:c68161740-68159740	304	319	-	13.3117	1.34e-05	0.00248	TTTTTTTTTTTTTTTT
MED1	hTFtarget	NC_000012.12:c68161740-68159740	305	320	-	13.3117	1.34e-05	0.00248	TTTTTTTTTTTTTTTT
MED1	hTFtarget	NC_000012.12:c68161740-68159740	306	321	-	13.3117	1.34e-05	0.00248	TTTTTTTTTTTTTTTT
OTX2	hTFtarget	NC_000012.12:c68161740-68159740	707	721	-	13.3896	1.34e-05	0.0473	TCTTTCAGATACAAA
BTAF1	hTFtarget	NC_000012.12:c68161740-68159740	194	205	+	13.6842	1.34e-05	0.0217	GGGAGGCTGAGG
BTAF1	hTFtarget	NC_000012.12:c68161740-68159740	1027	1038	-	13.6842	1.34e-05	0.0217	GGGAGGCTGAGG
USF2	hTFtarget	NC_000012.12:c68161740-68159740	1118	1126	+	13.6579	1.34e-05	0.0533	ATTGGCTAG
CTCF	hTFtarget	NC_000012.12:c68161740-68159740	996	1009	+	12.7121	1.34e-05	0.0534	CTCCACCTTCTGGG
EOMES	hTFtarget	NC_000012.12:c68161740-68159740	1738	1749	+	13.5	1.34e-05	0.0504	ATGGTGTGAAGT
E2F1	database	NC_000012.12:c68161740-68159740	202	212	+	14.1148	1.35e-05	0.0539	GAGGCGGGAGA
ZEB1	database	NC_000012.12:c68161740-68159740	1186	1197	-	13.1224	1.35e-05	0.052	TCACACCTGTAA
KDM5B	hTFtarget	NC_000012.12:c68161740-68159740	133	157	+	11.6923	1.35e-05	0.00195	AAAAAAAAAAAAAAAAAAAAAATTA
NFYB	hTFtarget	NC_000012.12:c68161740-68159740	906	921	-	7.97368	1.35e-05	0.0256	AAAGAAAAAAAGAAAA
ZNF384	hTFtarget	NC_000012.12:c68161740-68159740	1698	1713	+	13.2237	1.35e-05	0.0179	GGGCGAAGTGGGGAGG
CTCF	hTFtarget	NC_000012.12:c68161740-68159740	995	1010	-	12.789	1.35e-05	0.0537	ACCCAGAAGGTGGAGG
IRF5	hTFtarget	NC_000012.12:c68161740-68159740	905	920	-	7.7013	1.36e-05	0.000998	AAGAAAAAAAGAAAAA
SMARCA4	hTFtarget	NC_000012.12:c68161740-68159740	994	1009	+	13.1579	1.36e-05	0.0541	ACCTCCACCTTCTGGG
USF1	hTFtarget	NC_000012.12:c68161740-68159740	1108	1129	+	12.8947	1.36e-05	0.0526	GTTTCACCATATTGGCTAGGCT
ZNF143	hTFtarget	NC_000012.12:c68161740-68159740	226	245	-	12.3714	1.36e-05	0.0107	CACTGCAAGCTCTGCCTCCC
ERG	hTFtarget	NC_000012.12:c68161740-68159740	899	923	+	-15.6711	1.36e-05	0.00364	TTTCCTTTTTTCTTTTTTTCTTTTT
GATA1	database	NC_000012.12:c68161740-68159740	1899	1913	-	11.5526	1.37e-05	0.0524	GTGACAGATAGGCAG
MEF2A	hTFtarget	NC_000012.12:c68161740-68159740	1086	1099	+	13.3433	1.37e-05	0.0238	TTGTATTTTTAGTA
RELA	hTFtarget	NC_000012.12:c68161740-68159740	680	695	+	12.5897	1.37e-05	0.0252	AAAGGAGGAGAAAGAA
CTCF	hTFtarget	NC_000012.12:c68161740-68159740	994	1009	-	12.3182	1.37e-05	0.0544	CCCAGAAGGTGGAGGT
CTCF	hTFtarget	NC_000012.12:c68161740-68159740	993	1008	-	12.6	1.37e-05	0.0545	CCAGAAGGTGGAGGTT
EP300	hTFtarget	NC_000012.12:c68161740-68159740	480	494	+	8.92857	1.37e-05	0.0544	AGGAGACTGAGTCAT
MAFA	database	NC_000012.12:c68161740-68159740	194	214	-	13.1348	1.38e-05	0.0545	ATTCTCCCGCCTCAGCCTCCC
POLR2A	hTFtarget	NC_000012.12:c68161740-68159740	196	211	-	12.2105	1.38e-05	0.0548	CTCCCGCCTCAGCCTC
TBP	hTFtarget	NC_000012.12:c68161740-68159740	844	859	-	13.1711	1.38e-05	0.0549	TTTGGTCTAGTCGTAT
HNF1A	database	NC_000012.12:c68161740-68159740	345	365	+	12.7097	1.39e-05	0.0378	CCAAAATAATAATAAACTTTT
ESRRA	hTFtarget	NC_000012.12:c68161740-68159740	1141	1152	-	13.3	1.39e-05	0.0555	CACAAGGTCAGG
JUN	hTFtarget	NC_000012.12:c68161740-68159740	485	496	+	13.8289	1.39e-05	0.0547	ACTGAGTCATAG
MED1	hTFtarget	NC_000012.12:c68161740-68159740	904	919	+	13.2597	1.39e-05	0.00248	TTTTTTCTTTTTTTCT
SP1	hTFtarget	NC_000012.12:c68161740-68159740	158	169	+	13.3143	1.39e-05	0.0551	GCCGGGCGTGGC
STAT1	hTFtarget	NC_000012.12:c68161740-68159740	680	691	+	13.1053	1.39e-05	0.0531	AAAGGAGGAGAA
ZNF92	hTFtarget	NC_000012.12:c68161740-68159740	719	743	-	12.0694	1.39e-05	0.002	TTTTTAACTTTTTATTTCTTTGTCT
CTCF	hTFtarget	NC_000012.12:c68161740-68159740	994	1007	-	13.0152	1.39e-05	0.0552	CAGAAGGTGGAGGT
IRF5	hTFtarget	NC_000012.12:c68161740-68159740	299	314	+	7.61039	1.4e-05	0.00101	TCAAAAAAAAAAAAAA
RXRA	hTFtarget	NC_000012.12:c68161740-68159740	712	726	+	13.1039	1.4e-05	0.0523	ATCTGAAAGACAAAG
SOX2	hTFtarget	NC_000012.12:c68161740-68159740	712	727	-	13.1831	1.4e-05	0.0509	TCTTTGTCTTTCAGAT
SP2	hTFtarget	NC_000012.12:c68161740-68159740	124	145	-	13.0897	1.4e-05	0.00193	TTTTTTTTTTTTTTGTGCTATT
CTCF	hTFtarget	NC_000012.12:c68161740-68159740	995	1009	+	12.6212	1.4e-05	0.0555	CCTCCACCTTCTGGG
CTCF	hTFtarget	NC_000012.12:c68161740-68159740	994	1009	-	12.0606	1.4e-05	0.0556	CCCAGAAGGTGGAGGT
FOXP4	database	NC_000012.12:c68161740-68159740	143	157	+	13.5149	1.4e-05	0.00287	AAAAAAAAAAAATTA
MAFA	database	NC_000012.12:c68161740-68159740	194	214	-	13.0918	1.4e-05	0.0552	ATTCTCCCGCCTCAGCCTCCC
TBP	database	NC_000012.12:c68161740-68159740	1969	1983	+	12.7361	1.41e-05	0.0512	GTATAAATACCAGCA
POLR3A	database	NC_000012.12:c68161740-68159740	1003	1018	+	12.7273	1.41e-05	0.014	TTCTGGGTTCAAGCCA
IRF1	hTFtarget	NC_000012.12:c68161740-68159740	132	147	+	13.4935	1.41e-05	0.00237	AAAAAAAAAAAAAAAA
IRF1	hTFtarget	NC_000012.12:c68161740-68159740	133	148	+	13.4935	1.41e-05	0.00237	AAAAAAAAAAAAAAAA
IRF1	hTFtarget	NC_000012.12:c68161740-68159740	134	149	+	13.4935	1.41e-05	0.00237	AAAAAAAAAAAAAAAA
IRF1	hTFtarget	NC_000012.12:c68161740-68159740	135	150	+	13.4935	1.41e-05	0.00237	AAAAAAAAAAAAAAAA
IRF1	hTFtarget	NC_000012.12:c68161740-68159740	136	151	+	13.4935	1.41e-05	0.00237	AAAAAAAAAAAAAAAA
IRF1	hTFtarget	NC_000012.12:c68161740-68159740	137	152	+	13.4935	1.41e-05	0.00237	AAAAAAAAAAAAAAAA
IRF1	hTFtarget	NC_000012.12:c68161740-68159740	138	153	+	13.4935	1.41e-05	0.00237	AAAAAAAAAAAAAAAA
IRF1	hTFtarget	NC_000012.12:c68161740-68159740	139	154	+	13.4935	1.41e-05	0.00237	AAAAAAAAAAAAAAAA
IRF1	hTFtarget	NC_000012.12:c68161740-68159740	301	316	+	13.4935	1.41e-05	0.00237	AAAAAAAAAAAAAAAA
IRF1	hTFtarget	NC_000012.12:c68161740-68159740	302	317	+	13.4935	1.41e-05	0.00237	AAAAAAAAAAAAAAAA
IRF1	hTFtarget	NC_000012.12:c68161740-68159740	303	318	+	13.4935	1.41e-05	0.00237	AAAAAAAAAAAAAAAA
IRF1	hTFtarget	NC_000012.12:c68161740-68159740	304	319	+	13.4935	1.41e-05	0.00237	AAAAAAAAAAAAAAAA
IRF1	hTFtarget	NC_000012.12:c68161740-68159740	305	320	+	13.4935	1.41e-05	0.00237	AAAAAAAAAAAAAAAA
IRF1	hTFtarget	NC_000012.12:c68161740-68159740	306	321	+	13.4935	1.41e-05	0.00237	AAAAAAAAAAAAAAAA
IRF2	hTFtarget	NC_000012.12:c68161740-68159740	896	914	-	10.8333	1.41e-05	0.0341	AAAAGAAAAAAGGAAAGAA
MAZ	hTFtarget	NC_000012.12:c68161740-68159740	1696	1711	-	13.2857	1.41e-05	0.0538	TCCCCACTTCGCCCTG
BCL11A	hTFtarget	NC_000012.12:c68161740-68159740	669	684	-	13.1688	1.41e-05	0.0355	CCTTTGTAATTTATTT
CTCF	hTFtarget	NC_000012.12:c68161740-68159740	994	1009	-	12.2347	1.41e-05	0.0559	CCCAGAAGGTGGAGGT
EP300	hTFtarget	NC_000012.12:c68161740-68159740	907	921	+	12.8462	1.41e-05	0.024	TTTCTTTTTTTCTTT
MYEF2	database	NC_000012.12:c68161740-68159740	1370	1385	+	7.95122	1.42e-05	0.0527	CTTTTAAAAAAACTTT
FLI1	hTFtarget	NC_000012.12:c68161740-68159740	1546	1557	-	12.5294	1.42e-05	0.0519	AAGCAAGGAAAG
GTF3C2	hTFtarget	NC_000012.12:c68161740-68159740	1596	1617	-	12.9744	1.42e-05	0.00751	GGGCCTCTCAAACCTTTACAAA
KLF1	hTFtarget	NC_000012.12:c68161740-68159740	992	1007	-	13.2105	1.42e-05	0.0565	CAGAAGGTGGAGGTTG
POU5F1	hTFtarget	NC_000012.12:c68161740-68159740	719	734	+	13.141	1.42e-05	0.026	AGACAAAGAAATAAAA
IRF1	hTFtarget	NC_000012.12:c68161740-68159740	898	913	-	11.3521	1.43e-05	0.0433	AAAGAAAAAAGGAAAG
SP2	hTFtarget	NC_000012.12:c68161740-68159740	307	328	-	13.0641	1.43e-05	0.00193	TCATTTCTTTTTTTTTTTTTTT
USF1	hTFtarget	NC_000012.12:c68161740-68159740	1985	2000	-	12.4605	1.43e-05	0.0563	GCTGCACCTCCTCTGG
ELF1	hTFtarget	NC_000012.12:c68161740-68159740	1846	1861	+	13.2632	1.43e-05	0.0569	ACTACAACACCCAAAT
BCL6	hTFtarget	NC_000012.12:c68161740-68159740	1217	1225	+	14.0263	1.44e-05	0.0575	CCCCTGGGA
CTCF	hTFtarget	NC_000012.12:c68161740-68159740	995	1010	+	12.303	1.44e-05	0.057	CCTCCACCTTCTGGGT
PAX5	database	NC_000012.12:c68161740-68159740	151	169	+	12.9643	1.45e-05	0.0576	AAAATTAGCCGGGCGTGGC
BDP1	database	NC_000012.12:c68161740-68159740	1130	1141	+	13.1532	1.45e-05	0.017	GGTCTCAAACTC
JUNB	hTFtarget	NC_000012.12:c68161740-68159740	481	496	-	13.9091	1.45e-05	0.0576	CTATGACTCAGTCTCC
STAT1	hTFtarget	NC_000012.12:c68161740-68159740	1206	1221	-	10.1842	1.45e-05	0.0562	AGGGGGAGTTCCAGAC
STAT1	hTFtarget	NC_000012.12:c68161740-68159740	1206	1221	-	10.1842	1.45e-05	0.0562	AGGGGGAGTTCCAGAC
ARID3A	database	NC_000012.12:c68161740-68159740	1336	1357	+	12.6522	1.46e-05	0.0467	GTTTAAATACAATATATTTTAA
RAD21	hTFtarget	NC_000012.12:c68161740-68159740	997	1008	-	13.0455	1.46e-05	0.0581	CCAGAAGGTGGA
RAD21	hTFtarget	NC_000012.12:c68161740-68159740	993	1008	+	12.3286	1.46e-05	0.0579	AACCTCCACCTTCTGG
CTCF	hTFtarget	NC_000012.12:c68161740-68159740	172	187	+	13.2237	1.46e-05	0.0578	GTGCCTGTAGTCCCAG
E2F6	database	NC_000012.12:c68161740-68159740	202	213	+	13.3163	1.47e-05	0.0585	GAGGCGGGAGAA
TBX5	database	NC_000012.12:c68161740-68159740	1190	1197	+	13.6517	1.47e-05	0.0584	AGGTGTGA
SF1	database	NC_000012.12:c68161740-68159740	1143	1150	+	14.6789	1.47e-05	0.0585	TGACCTTG
ESRRG	database	NC_000012.12:c68161740-68159740	1143	1150	-	14.0459	1.47e-05	0.0523	CAAGGTCA
AP1	database	NC_000012.12:c68161740-68159740	486	493	-	11.9571	1.47e-05	0.0568	TGACTCAG
FLI1	hTFtarget	NC_000012.12:c68161740-68159740	304	328	+	-12.6711	1.47e-05	0.00558	AAAAAAAAAAAAAAAAAAGAAATGA
FOSL2	hTFtarget	NC_000012.12:c68161740-68159740	486	494	-	13.5634	1.47e-05	0.055	ATGACTCAG
FOXM1	hTFtarget	NC_000012.12:c68161740-68159740	295	314	-	13.1039	1.47e-05	0.0291	TTTTTTTTTTTTTTGAGACG
POLR3A	hTFtarget	NC_000012.12:c68161740-68159740	67	88	-	8.57143	1.47e-05	0.0225	ATGGTCTCGATCTCCTGACCTC
POLR3A	hTFtarget	NC_000012.12:c68161740-68159740	904	919	-	13.1795	1.47e-05	0.00144	AGAAAAAAAGAAAAAA
SP2	hTFtarget	NC_000012.12:c68161740-68159740	142	157	-	13.1944	1.47e-05	0.00154	TAATTTTTTTTTTTTT
STAG1	hTFtarget	NC_000012.12:c68161740-68159740	993	1008	-	12.8636	1.47e-05	0.0582	CCAGAAGGTGGAGGTT
CTCF	hTFtarget	NC_000012.12:c68161740-68159740	993	1008	+	12.7576	1.47e-05	0.0585	AACCTCCACCTTCTGG
EP300	hTFtarget	NC_000012.12:c68161740-68159740	899	914	+	13.1579	1.47e-05	0.0138	TTTCCTTTTTTCTTTT
E2F6	database	NC_000012.12:c68161740-68159740	202	213	+	13.2752	1.47e-05	0.0584	GAGGCGGGAGAA
TBX15	database	NC_000012.12:c68161740-68159740	1190	1197	+	15.3776	1.47e-05	0.0585	AGGTGTGA
TBX5	database	NC_000012.12:c68161740-68159740	1190	1197	+	13.6429	1.47e-05	0.0584	AGGTGTGA
IRF1	hTFtarget	NC_000012.12:c68161740-68159740	899	914	-	13.2987	1.48e-05	0.0137	AAAAGAAAAAAGGAAA
PAX5	hTFtarget	NC_000012.12:c68161740-68159740	153	168	+	13.1791	1.48e-05	0.0585	AATTAGCCGGGCGTGG
SUMO1	hTFtarget	NC_000012.12:c68161740-68159740	994	1009	+	12.0714	1.48e-05	0.0588	ACCTCCACCTTCTGGG
THAP11	hTFtarget	NC_000012.12:c68161740-68159740	1845	1856	+	13.5658	1.48e-05	0.0589	AACTACAACACC
CTCF	hTFtarget	NC_000012.12:c68161740-68159740	995	1009	+	12.4091	1.48e-05	0.0589	CCTCCACCTTCTGGG
CTCF	hTFtarget	NC_000012.12:c68161740-68159740	995	1009	+	12.4091	1.48e-05	0.0589	CCTCCACCTTCTGGG
FLI1	hTFtarget	NC_000012.12:c68161740-68159740	890	911	+	-4.27143	1.49e-05	0.00835	CTGTATTTCTTTCCTTTTTTCT
MYC	hTFtarget	NC_000012.12:c68161740-68159740	899	907	-	12.8026	1.49e-05	0.0564	AAAAGGAAA
SP2	hTFtarget	NC_000012.12:c68161740-68159740	297	318	-	13.0128	1.49e-05	0.00194	TTTTTTTTTTTTTTTTTTGAGA
ZNF92	hTFtarget	NC_000012.12:c68161740-68159740	126	150	-	11.9444	1.49e-05	0.00206	TTTTTTTTTTTTTTTTTTTGTGCTA
CREB1	hTFtarget	NC_000012.12:c68161740-68159740	890	905	-	12.8516	1.49e-05	0.0433	AAGGAAAGAAATACAG
CTCF	hTFtarget	NC_000012.12:c68161740-68159740	996	1009	+	12.5758	1.49e-05	0.0593	CTCCACCTTCTGGG
FOXP4	database	NC_000012.12:c68161740-68159740	130	144	+	13.4653	1.49e-05	0.00287	ACAAAAAAAAAAAAA
CTCF	hTFtarget	NC_000012.12:c68161740-68159740	997	1008	-	13.1212	1.5e-05	0.0597	CCAGAAGGTGGA
SPI1	hTFtarget	NC_000012.12:c68161740-68159740	993	1014	-	11.1184	1.51e-05	0.0597	TTGAACCCAGAAGGTGGAGGTT
GATA4	database	NC_000012.12:c68161740-68159740	900	911	-	13.367	1.52e-05	0.0287	AGAAAAAAGGAA
NANOG	hTFtarget	NC_000012.12:c68161740-68159740	670	685	-	13.0833	1.52e-05	0.0284	TCCTTTGTAATTTATT
NR2F2	hTFtarget	NC_000012.12:c68161740-68159740	1140	1155	+	12.7121	1.52e-05	0.0428	TCCTGACCTTGTGATC
RELA	hTFtarget	NC_000012.12:c68161740-68159740	1208	1219	-	13.3939	1.52e-05	0.0602	GGGGAGTTCCAG
BCL6	hTFtarget	NC_000012.12:c68161740-68159740	1756	1767	+	13.1831	1.53e-05	0.0592	GCCTTCAAAGAA
RXRA	hTFtarget	NC_000012.12:c68161740-68159740	895	906	-	13.1688	1.53e-05	0.0586	AAAGGAAAGAAA
HIC1	database	NC_000012.12:c68161740-68159740	1782	1797	-	13.4605	1.54e-05	0.0444	ATTATGCCCACCTGTG
ETS1	hTFtarget	NC_000012.12:c68161740-68159740	1846	1861	+	12.8947	1.54e-05	0.0608	ACTACAACACCCAAAT
FLI1	hTFtarget	NC_000012.12:c68161740-68159740	902	923	+	-4.41429	1.54e-05	0.00835	CCTTTTTTCTTTTTTTCTTTTT
STAG1	hTFtarget	NC_000012.12:c68161740-68159740	993	1008	-	12.2121	1.54e-05	0.0613	CCAGAAGGTGGAGGTT
ZNF143	hTFtarget	NC_000012.12:c68161740-68159740	907	927	-	12.8205	1.54e-05	0.00345	AAAAAAAAAGAAAAAAAGAAA
CTCF	hTFtarget	NC_000012.12:c68161740-68159740	995	1010	+	11.8485	1.54e-05	0.0611	CCTCCACCTTCTGGGT
E2F8	hTFtarget	NC_000012.12:c68161740-68159740	1846	1861	+	12.8816	1.54e-05	0.0608	ACTACAACACCCAAAT
EP300	hTFtarget	NC_000012.12:c68161740-68159740	193	217	+	12.5132	1.54e-05	0.0319	CGGGAGGCTGAGGCGGGAGAATGGC
FOXM1	hTFtarget	NC_000012.12:c68161740-68159740	696	715	+	13.026	1.55e-05	0.0291	TCCTATTTTTTTTTGTATCT
MYC	hTFtarget	NC_000012.12:c68161740-68159740	889	907	-	12.2763	1.55e-05	0.0586	AAAAGGAAAGAAATACAGT
CTCF	hTFtarget	NC_000012.12:c68161740-68159740	994	1009	-	12	1.55e-05	0.0615	CCCAGAAGGTGGAGGT
NANOG	hTFtarget	NC_000012.12:c68161740-68159740	669	684	-	12.9722	1.56e-05	0.029	CCTTTGTAATTTATTT
REST	hTFtarget	NC_000012.12:c68161740-68159740	33	44	-	12.1818	1.56e-05	0.0306	CCAAAGTGCTGG
REST	hTFtarget	NC_000012.12:c68161740-68159740	1172	1183	+	12.1818	1.56e-05	0.0306	CCAAAGTGCTGG
SPI1	hTFtarget	NC_000012.12:c68161740-68159740	1512	1523	-	13.1667	1.56e-05	0.0612	GGTGAGGAAGTC
THAP11	hTFtarget	NC_000012.12:c68161740-68159740	1846	1861	+	11.8026	1.56e-05	0.0617	ACTACAACACCCAAAT
CTCF	hTFtarget	NC_000012.12:c68161740-68159740	996	1009	+	12.6212	1.56e-05	0.0622	CTCCACCTTCTGGG
IRF5	hTFtarget	NC_000012.12:c68161740-68159740	899	914	-	7.20779	1.57e-05	0.0011	AAAAGAAAAAAGGAAA
NFE2	hTFtarget	NC_000012.12:c68161740-68159740	896	917	+	13.1026	1.57e-05	0.0121	TTCTTTCCTTTTTTCTTTTTTT
POLR2A	hTFtarget	NC_000012.12:c68161740-68159740	682	697	+	12.8701	1.57e-05	0.014	AGGAGGAGAAAGAATC
CTCF	hTFtarget	NC_000012.12:c68161740-68159740	995	1010	+	12.2424	1.57e-05	0.0625	CCTCCACCTTCTGGGT
FOS	hTFtarget	NC_000012.12:c68161740-68159740	484	495	+	13.8788	1.58e-05	0.0626	GACTGAGTCATA
SMAD4	hTFtarget	NC_000012.12:c68161740-68159740	888	903	-	13.1688	1.58e-05	0.0595	GGAAAGAAATACAGTG
SPI1	hTFtarget	NC_000012.12:c68161740-68159740	1845	1869	-	12.4605	1.58e-05	0.0505	TTTGTGGCATTTGGGTGTTGTAGTT
STAT1	hTFtarget	NC_000012.12:c68161740-68159740	684	699	+	10.5658	1.58e-05	0.0606	GAGGAGAAAGAATCCT
CTCF	hTFtarget	NC_000012.12:c68161740-68159740	994	1009	+	11.8	1.58e-05	0.0626	ACCTCCACCTTCTGGG
E2F1	hTFtarget	NC_000012.12:c68161740-68159740	202	213	+	13.6857	1.58e-05	0.0627	GAGGCGGGAGAA
ESRRG	database	NC_000012.12:c68161740-68159740	1141	1153	-	13.1224	1.59e-05	0.0627	TCACAAGGTCAGG
EBF1	database	NC_000012.12:c68161740-68159740	1216	1225	+	13.3596	1.59e-05	0.0632	CCCCCTGGGA
GTF3C2	hTFtarget	NC_000012.12:c68161740-68159740	1079	1103	-	8.83117	1.59e-05	0.003	TCTCTACTAAAAATACAAAAAAATT
CTCF	hTFtarget	NC_000012.12:c68161740-68159740	994	1007	-	12.5303	1.59e-05	0.0634	CAGAAGGTGGAGGT
CTCF	hTFtarget	NC_000012.12:c68161740-68159740	997	1008	-	13.0606	1.59e-05	0.0633	CCAGAAGGTGGA
BCL6B	database	NC_000012.12:c68161740-68159740	1755	1771	+	-0.683673	1.59e-05	0.0625	TGCCTTCAAAGAATCCC
NANOG	hTFtarget	NC_000012.12:c68161740-68159740	719	730	+	12.5	1.6e-05	0.0613	AGACAAAGAAAT
RB1	hTFtarget	NC_000012.12:c68161740-68159740	200	211	+	13.0132	1.6e-05	0.0633	CTGAGGCGGGAG
BRD4	hTFtarget	NC_000012.12:c68161740-68159740	1154	1175	+	12.7792	1.6e-05	0.041	TCCACCCGCCTCAACCTCCCAA
BRD4	hTFtarget	NC_000012.12:c68161740-68159740	912	933	-	12.9872	1.6e-05	0.00388	TCAAAAAAAAAAAAAGAAAAAA
RXRA	hTFtarget	NC_000012.12:c68161740-68159740	260	271	+	13.1842	1.6e-05	0.0634	CACTGCACTCCA
CTCF	hTFtarget	NC_000012.12:c68161740-68159740	995	1010	+	11.7576	1.6e-05	0.0635	CCTCCACCTTCTGGGT
EP300	hTFtarget	NC_000012.12:c68161740-68159740	906	921	-	12.9571	1.6e-05	0.0603	AAAGAAAAAAAGAAAA
FOXP4	database	NC_000012.12:c68161740-68159740	128	142	+	13.4059	1.6e-05	0.00287	GCACAAAAAAAAAAA
SMARCC2	database	NC_000012.12:c68161740-68159740	1844	1864	+	7.03061	1.6e-05	0.0632	TAACTACAACACCCAAATGCC
IRF4	database	NC_000012.12:c68161740-68159740	905	920	-	13.2034	1.61e-05	0.00245	AAGAAAAAAAGAAAAA
NANOG	hTFtarget	NC_000012.12:c68161740-68159740	712	727	-	13.0704	1.61e-05	0.0606	TCTTTGTCTTTCAGAT
NFE2	hTFtarget	NC_000012.12:c68161740-68159740	275	290	+	12.8485	1.61e-05	0.0628	TGGGTGACAGAGCAAG
BRD4	hTFtarget	NC_000012.12:c68161740-68159740	902	926	-	12.7792	1.61e-05	0.00478	AAAAAAAAGAAAAAAAGAAAAAAGG
ZNF384	hTFtarget	NC_000012.12:c68161740-68159740	143	164	-	7.875	1.61e-05	0.00111	GCCCGGCTAATTTTTTTTTTTT
E2F7	hTFtarget	NC_000012.12:c68161740-68159740	202	213	+	13.6447	1.61e-05	0.0639	GAGGCGGGAGAA
ETV7	hTFtarget	NC_000012.12:c68161740-68159740	1160	1181	-	11.6842	1.62e-05	0.0639	AGCACTTTGGGAGGTTGAGGCG
BRD4	hTFtarget	NC_000012.12:c68161740-68159740	1828	1839	+	13.1818	1.62e-05	0.0617	AGTCTAAAGGAA
SPI1	hTFtarget	NC_000012.12:c68161740-68159740	195	216	+	10.9857	1.62e-05	0.0641	GGAGGCTGAGGCGGGAGAATGG
STAG1	hTFtarget	NC_000012.12:c68161740-68159740	993	1008	-	11.8636	1.62e-05	0.0642	CCAGAAGGTGGAGGTT
CTCF	hTFtarget	NC_000012.12:c68161740-68159740	996	1009	+	12.803	1.62e-05	0.0642	CTCCACCTTCTGGG
EP300	hTFtarget	NC_000012.12:c68161740-68159740	1015	1039	-	12.4211	1.62e-05	0.0319	AGGGAGGCTGAGGCAGGAGAATGGC
ESRRA	database	NC_000012.12:c68161740-68159740	1143	1151	-	12.9083	1.63e-05	0.0648	ACAAGGTCA
FOSL1	hTFtarget	NC_000012.12:c68161740-68159740	486	494	+	14.3714	1.63e-05	0.0647	CTGAGTCAT
FOXO3	hTFtarget	NC_000012.12:c68161740-68159740	486	494	-	14.1184	1.63e-05	0.0637	ATGACTCAG
HDAC6	hTFtarget	NC_000012.12:c68161740-68159740	486	494	+	13.8592	1.63e-05	0.0587	CTGAGTCAT
IRF1	hTFtarget	NC_000012.12:c68161740-68159740	907	922	-	13.1558	1.63e-05	0.0137	AAAAGAAAAAAAGAAA
KDM5B	hTFtarget	NC_000012.12:c68161740-68159740	900	915	+	13.1806	1.63e-05	0.00342	TTCCTTTTTTCTTTTT
POLR2A	hTFtarget	NC_000012.12:c68161740-68159740	1158	1173	+	12.6714	1.63e-05	0.0195	CCCGCCTCAACCTCCC
BRD4	hTFtarget	NC_000012.12:c68161740-68159740	902	923	-	12.9615	1.63e-05	0.00388	AAAAAGAAAAAAAGAAAAAAGG
RXRA	hTFtarget	NC_000012.12:c68161740-68159740	486	494	-	13.9429	1.63e-05	0.0638	ATGACTCAG
SPI1	hTFtarget	NC_000012.12:c68161740-68159740	486	494	+	14.2237	1.63e-05	0.063	CTGAGTCAT
TRIM24	hTFtarget	NC_000012.12:c68161740-68159740	307	328	+	12.7821	1.63e-05	0.00221	AAAAAAAAAAAAAAAGAAATGA
CDK8	hTFtarget	NC_000012.12:c68161740-68159740	486	494	-	14.6842	1.63e-05	0.063	ATGACTCAG
CTCF	hTFtarget	NC_000012.12:c68161740-68159740	994	1009	-	12.0606	1.63e-05	0.0646	CCCAGAAGGTGGAGGT
CTCF	hTFtarget	NC_000012.12:c68161740-68159740	992	1009	+	12.2727	1.63e-05	0.0647	CAACCTCCACCTTCTGGG
CTCF	hTFtarget	NC_000012.12:c68161740-68159740	995	1010	-	12.2576	1.63e-05	0.0647	ACCCAGAAGGTGGAGG
E2F6	hTFtarget	NC_000012.12:c68161740-68159740	201	212	+	13.7143	1.63e-05	0.0648	TGAGGCGGGAGA
ESRRA	database	NC_000012.12:c68161740-68159740	1143	1151	+	12.878	1.63e-05	0.0648	TGACCTTGT
IRF4	database	NC_000012.12:c68161740-68159740	905	920	-	13.1584	1.63e-05	0.00246	AAGAAAAAAAGAAAAA
TBX3	database	NC_000012.12:c68161740-68159740	1178	1201	+	9.66972	1.64e-05	0.0649	TGCTGGGATTACAGGTGTGAGCCA
IRF2	database	NC_000012.12:c68161740-68159740	895	910	-	13.2805	1.64e-05	0.0626	GAAAAAAGGAAAGAAA
SOX2	hTFtarget	NC_000012.12:c68161740-68159740	1016	1027	+	12.6866	1.64e-05	0.0615	CCATTCTCCTGC
BTAF1	hTFtarget	NC_000012.12:c68161740-68159740	1986	1997	+	13.2763	1.64e-05	0.0217	CAGAGGAGGTGC
C17orf96	hTFtarget	NC_000012.12:c68161740-68159740	897	921	-	12.8861	1.64e-05	0.0161	AAAGAAAAAAAGAAAAAAGGAAAGA
CTCF	hTFtarget	NC_000012.12:c68161740-68159740	994	1009	+	11.6515	1.64e-05	0.0651	ACCTCCACCTTCTGGG
ATOH8	database	NC_000012.12:c68161740-68159740	1783	1791	-	13.3776	1.64e-05	0.0654	CCCACCTGT
E2F1	database	NC_000012.12:c68161740-68159740	200	213	+	12.7823	1.64e-05	0.0653	CTGAGGCGGGAGAA
E2F1	database	NC_000012.12:c68161740-68159740	200	213	+	12.8226	1.65e-05	0.0655	CTGAGGCGGGAGAA
JUND	hTFtarget	NC_000012.12:c68161740-68159740	484	495	-	13.0909	1.65e-05	0.0655	TATGACTCAGTC
ESR1	hTFtarget	NC_000012.12:c68161740-68159740	897	921	-	12.209	1.66e-05	0.0267	AAAGAAAAAAAGAAAAAAGGAAAGA
KDM5B	hTFtarget	NC_000012.12:c68161740-68159740	994	1009	+	11.4429	1.66e-05	0.066	ACCTCCACCTTCTGGG
RAD21	hTFtarget	NC_000012.12:c68161740-68159740	994	1011	+	12.1212	1.66e-05	0.066	ACCTCCACCTTCTGGGTT
TRIM24	hTFtarget	NC_000012.12:c68161740-68159740	299	320	+	12.7564	1.66e-05	0.00221	TCAAAAAAAAAAAAAAAAAAAA
CTCF	hTFtarget	NC_000012.12:c68161740-68159740	996	1009	-	12.3939	1.66e-05	0.066	CCCAGAAGGTGGAG
TFAP2D	database	NC_000012.12:c68161740-68159740	1022	1035	-	11.6098	1.67e-05	0.0332	AGGCTGAGGCAGGA
E2F4	database	NC_000012.12:c68161740-68159740	203	213	+	13.8966	1.67e-05	0.0663	AGGCGGGAGAA
REST	hTFtarget	NC_000012.12:c68161740-68159740	1447	1458	-	13.0526	1.67e-05	0.0663	ATCAGCACTGCC
CTCF	hTFtarget	NC_000012.12:c68161740-68159740	995	1010	-	12.303	1.67e-05	0.0661	ACCCAGAAGGTGGAGG
AR	hTFtarget	NC_000012.12:c68161740-68159740	962	973	-	12.9524	1.68e-05	0.0308	CCACTACACTCC
MAZ	hTFtarget	NC_000012.12:c68161740-68159740	994	1009	+	11.7368	1.68e-05	0.0668	ACCTCCACCTTCTGGG
SPI1	hTFtarget	NC_000012.12:c68161740-68159740	995	1010	-	12.8553	1.68e-05	0.0666	ACCCAGAAGGTGGAGG
C17orf96	hTFtarget	NC_000012.12:c68161740-68159740	901	925	-	12.8481	1.68e-05	0.0161	AAAAAAAGAAAAAAAGAAAAAAGGA
CTCF	hTFtarget	NC_000012.12:c68161740-68159740	995	1010	-	11.8939	1.68e-05	0.0666	ACCCAGAAGGTGGAGG
EZH2	hTFtarget	NC_000012.12:c68161740-68159740	721	742	+	11.7093	1.69e-05	0.00512	ACAAAGAAATAAAAAGTTAAAA
FOXM1	hTFtarget	NC_000012.12:c68161740-68159740	1467	1475	-	12.7403	1.69e-05	0.0589	GTTTCAAAT
MED1	hTFtarget	NC_000012.12:c68161740-68159740	909	924	+	13.1169	1.69e-05	0.00267	TCTTTTTTTCTTTTTT
POLR2A	hTFtarget	NC_000012.12:c68161740-68159740	1021	1036	+	11.9079	1.69e-05	0.0335	CTCCTGCCTCAGCCTC
SPI1	hTFtarget	NC_000012.12:c68161740-68159740	483	494	+	13.5263	1.69e-05	0.0643	AGACTGAGTCAT
TFAP2A	hTFtarget	NC_000012.12:c68161740-68159740	997	1008	+	13.1579	1.69e-05	0.0671	TCCACCTTCTGG
ZBTB17	hTFtarget	NC_000012.12:c68161740-68159740	320	335	+	11.25	1.69e-05	0.0671	AAGAAATGACTAGTCA
CTCF	hTFtarget	NC_000012.12:c68161740-68159740	994	1009	+	11.8788	1.69e-05	0.0673	ACCTCCACCTTCTGGG
ESRRA	database	NC_000012.12:c68161740-68159740	1141	1151	-	13.2714	1.7e-05	0.0678	ACAAGGTCAGG
BDP1	database	NC_000012.12:c68161740-68159740	1007	1018	-	12.9369	1.7e-05	0.017	TGGCTTGAACCC
FOS	hTFtarget	NC_000012.12:c68161740-68159740	486	494	-	14.1818	1.7e-05	0.0635	ATGACTCAG
FOSL1	hTFtarget	NC_000012.12:c68161740-68159740	486	494	+	14.0303	1.7e-05	0.0675	CTGAGTCAT
JUN	hTFtarget	NC_000012.12:c68161740-68159740	486	494	-	14.7879	1.7e-05	0.0676	ATGACTCAG
JUND	hTFtarget	NC_000012.12:c68161740-68159740	486	494	+	14	1.7e-05	0.0648	CTGAGTCAT
JUND	hTFtarget	NC_000012.12:c68161740-68159740	486	494	-	14.5152	1.7e-05	0.0674	ATGACTCAG
NR3C1	hTFtarget	NC_000012.12:c68161740-68159740	486	494	-	13.7763	1.7e-05	0.066	ATGACTCAG
POLR3A	hTFtarget	NC_000012.12:c68161740-68159740	999	1020	-	8.15714	1.7e-05	0.0225	AATGGCTTGAACCCAGAAGGTG
RELA	hTFtarget	NC_000012.12:c68161740-68159740	486	494	-	14.4868	1.7e-05	0.0645	ATGACTCAG
SIN3A	hTFtarget	NC_000012.12:c68161740-68159740	486	494	+	13.6338	1.7e-05	0.0653	CTGAGTCAT
SMARCA4	hTFtarget	NC_000012.12:c68161740-68159740	486	494	+	14.1579	1.7e-05	0.066	CTGAGTCAT
SPI1	hTFtarget	NC_000012.12:c68161740-68159740	486	494	+	14.0909	1.7e-05	0.0648	CTGAGTCAT
SPI1	hTFtarget	NC_000012.12:c68161740-68159740	486	494	-	14.1974	1.7e-05	0.0646	ATGACTCAG
VEZF1	hTFtarget	NC_000012.12:c68161740-68159740	195	216	-	11.9143	1.7e-05	0.04	CCATTCTCCCGCCTCAGCCTCC
CTCF	hTFtarget	NC_000012.12:c68161740-68159740	1990	2000	+	13.1711	1.7e-05	0.0677	GGAGGTGCAGC
CTCF	hTFtarget	NC_000012.12:c68161740-68159740	994	1007	+	12.4545	1.7e-05	0.0675	ACCTCCACCTTCTG
EP300	hTFtarget	NC_000012.12:c68161740-68159740	486	494	+	13.9437	1.7e-05	0.0645	CTGAGTCAT
SP2	database	NC_000012.12:c68161740-68159740	197	211	-	13.0517	1.71e-05	0.0677	CTCCCGCCTCAGCCT
SRF	database	NC_000012.12:c68161740-68159740	1728	1742	-	12.8716	1.71e-05	0.0627	ACCATTCAAGGACTG
STAG1	hTFtarget	NC_000012.12:c68161740-68159740	988	1009	-	11.6061	1.71e-05	0.0677	CCCAGAAGGTGGAGGTTGCAGT
THAP11	hTFtarget	NC_000012.12:c68161740-68159740	1846	1861	-	12.2237	1.71e-05	0.0678	ATTTGGGTGTTGTAGT
CTCF	hTFtarget	NC_000012.12:c68161740-68159740	993	1008	+	12.7368	1.71e-05	0.0681	AACCTCCACCTTCTGG
IRF3	hTFtarget	NC_000012.12:c68161740-68159740	901	922	-	12.1408	1.72e-05	0.00271	AAAAGAAAAAAAGAAAAAAGGA
PLAG1	database	NC_000012.12:c68161740-68159740	45	58	+	9.60204	1.73e-05	0.0685	GAGGCCAAGGCGGG
NR4A1	database	NC_000012.12:c68161740-68159740	1142	1151	+	13.8899	1.73e-05	0.068	CTGACCTTGT
NANOG	hTFtarget	NC_000012.12:c68161740-68159740	711	726	-	12.8974	1.73e-05	0.0635	CTTTGTCTTTCAGATA
EP300	hTFtarget	NC_000012.12:c68161740-68159740	462	477	-	13.1974	1.73e-05	0.0687	CCTGTAAAACTGGCTT
SF1	database	NC_000012.12:c68161740-68159740	1143	1151	+	12.9775	1.74e-05	0.0692	TGACCTTGT
FLI1	hTFtarget	NC_000012.12:c68161740-68159740	1549	1560	-	12.6268	1.74e-05	0.0336	AGAAAGCAAGGA
IRF1	hTFtarget	NC_000012.12:c68161740-68159740	895	914	-	12	1.74e-05	0.0671	AAAAGAAAAAAGGAAAGAAA
MED1	hTFtarget	NC_000012.12:c68161740-68159740	311	326	+	13	1.74e-05	0.00319	AAAAAAAAAAAGAAAT
REST	hTFtarget	NC_000012.12:c68161740-68159740	1450	1458	+	13.5395	1.74e-05	0.0689	AGTGCTGAT
SP1	hTFtarget	NC_000012.12:c68161740-68159740	198	213	+	12.5857	1.74e-05	0.0689	GGCTGAGGCGGGAGAA
TBP	hTFtarget	NC_000012.12:c68161740-68159740	846	857	+	13.3684	1.74e-05	0.0692	ACGACTAGACCA
ZNF263	hTFtarget	NC_000012.12:c68161740-68159740	1158	1173	-	12.2571	1.74e-05	0.0687	GGGAGGTTGAGGCGGG
CTCF	hTFtarget	NC_000012.12:c68161740-68159740	992	1010	+	11.6364	1.74e-05	0.0692	CAACCTCCACCTTCTGGGT
EP300	hTFtarget	NC_000012.12:c68161740-68159740	391	401	+	13.1184	1.74e-05	0.0649	AAATTCCTAGC
SMAD3	hTFtarget	NC_000012.12:c68161740-68159740	706	721	+	12.641	1.75e-05	0.0332	TTTTGTATCTGAAAGA
SPI1	hTFtarget	NC_000012.12:c68161740-68159740	996	1007	-	13.1184	1.75e-05	0.0697	CAGAAGGTGGAG
CTCF	hTFtarget	NC_000012.12:c68161740-68159740	994	1009	-	11.4848	1.75e-05	0.0696	CCCAGAAGGTGGAGGT
KAT5	hTFtarget	NC_000012.12:c68161740-68159740	53	68	+	12.5921	1.76e-05	0.0684	GGCGGGCGGATCACGA
TAF1	hTFtarget	NC_000012.12:c68161740-68159740	196	211	-	11.1711	1.76e-05	0.0631	CTCCCGCCTCAGCCTC
CDK9	hTFtarget	NC_000012.12:c68161740-68159740	307	322	+	13.0513	1.76e-05	0.0024	AAAAAAAAAAAAAAAG
CTCF	hTFtarget	NC_000012.12:c68161740-68159740	993	1008	-	11.7424	1.76e-05	0.0701	CCAGAAGGTGGAGGTT
HIRA	hTFtarget	NC_000012.12:c68161740-68159740	386	397	-	13.2368	1.77e-05	0.0662	GGAATTTTTCCT
MYB	hTFtarget	NC_000012.12:c68161740-68159740	1643	1654	-	13.0658	1.77e-05	0.0704	TGCTTGTGGTTG
SPI1	hTFtarget	NC_000012.12:c68161740-68159740	987	1010	-	11.6429	1.77e-05	0.0702	ACCCAGAAGGTGGAGGTTGCAGTG
TEAD4	hTFtarget	NC_000012.12:c68161740-68159740	391	402	-	13.0303	1.77e-05	0.0678	TGCTAGGAATTT
CTCF	hTFtarget	NC_000012.12:c68161740-68159740	995	1010	+	12.1212	1.77e-05	0.0705	CCTCCACCTTCTGGGT
ZNF263	database	NC_000012.12:c68161740-68159740	1020	1040	-	12.1429	1.78e-05	0.0452	TAGGGAGGCTGAGGCAGGAGA
[truncated: 4,156 more rows]
